# Supplementary material for: QSAR models of human data can enrich or replace LLNA testing for human skin sensitization
Source: Royal Society of Chemistry journal article supplement (doi:10.1039/c6gc01836j), 2016-01-01
Supplement: c6gc01836j1.xlsx [file c6gc01836j1.xlsx]

## Sheet: Human and LLNA
#	Chemical Name	CASRN	CANONICAL SMILES	Calc MW	LLNA Results					Human Results
					N	GM1 EC3 (%)	Class	GM1 EC3 (μg/cm2)	GM1 EC3 (mol/m2)	N	GM1 DSA05 (μg/cm2)	GM1 DSA05 (mol/m2)	Class
1	1-Octen-3-yl acetate	2442-10-6	CCCCCC(OC(C)=O)C=C	170	1	NC	0	NC		1	6712	3.94824	1
2	2,4-Dinitrochlorobenzene	97-00-7	Clc1ccc(cc1N(=O)=O)N(=O)=O	202.5	24	0.04	3	11	0.0054321	2	3.4	0.00167901	2
3	2-Hexylidene cyclopentanone	17373-89-6	CCCCCC=C1CCCC1=O	166	1	2.4	2	600	0.361446	1	255	0.153614	2
4	2-Mercaptobenzothiazole	149-30-4	Sc1nc2ccccc2s1	167	6	2.6	2	645	0.386228	2	1930	1.15569	1
5	3,3',4',5-Tetrachlorosalicylanilide	1154-59-2	Oc1c(Cl)cc(Cl)cc1C(=O)Nc1ccc(Cl)c(Cl)c1	351	2	0.04	3	8.8	0.00250712	4	27	0.00769231	2
6	3,4-Dihydrocoumarin	119-84-6	O=C1CCc2ccccc2O1	148	2	4.3	2	1067	0.720946	2	759	0.512838	1
7	4-phenylenediamine	106-50-3	Nc1ccc(N)cc1	108	17	0.12	3	29.7	0.0275	4	30	0.0277778	2
8	Aniline	62-53-3	Nc1ccccc1	93	5	33	1	8129	8.74086	1	2463	2.64839	1
9	Benzisothiazolone	2634-33-5	O=C1NSc2ccccc12	151	4	7.79	2	1948	1.29007	1	50	0.0331126	2
10	Benzocaine	94-09-7	CCOC(=O)c1ccc(N)cc1	165	7	7.8	2	1948	1.18061	4	10140	6.14545	1
11	Benzoyl peroxide	94-36-0	O=C(OOC(=O)c1ccccc1)c1ccccc1	242	6	0.07	3	17	0.00702479	5	1283	0.530165	1
12	Benzyl alcohol	100-51-6	OCc1ccccc1	108	1	NC	0	NC		1	48670	45.0648	1
13	Benzylidene acetone	122-57-6	CC(=O)C=Cc1ccccc1	146	1	3.7	2	925	0.633562	2	299	0.204795	2
14	Bourgeonal	18127-01-0	CC(C)(C)c1ccc(CCC=O)cc1	190	1	4.3	2	1075	0.565789	1	1541	0.811053	1
15	Butyl glycidyl ether	2426-08-6	CCCCOCC1CO1	130	1	30.9	1	7725	5.94231	1	437	0.336154	2
16	Carvone	6485-40-1	CC(=C)C1CC=C(C)C(=O)C1	150	4	10	2	2514	1.676	1	19284	12.856	1
17	Chlorpromazine	50-53-3	CN(C)CCCN1c2ccccc2Sc2ccc(Cl)cc12	318.5	2	5.8	2	1455	0.456829	1	1149	0.360754	1
18	Cinnamic aldehyde	104-55-2	O=CC=Cc1ccccc1	132	27	1	3	254	0.192424	5	382	0.289394	2
19	Cinnamyl alcohol	104-54-1	OCC=Cc1ccccc1	134	2	20	1	5007	3.73657	6	3002	2.2403	1
20	Cinnamyl nitrile	4360-47-8	N#CC=Cc1ccccc1	129	1	NC	0	NC		1	1828	1.41705	1
21	Citral	5392-40-5	CC(C)=CCCC(C)=CC=O	152	16	5	2	1246	0.819737	5	915	0.601974	1
22	Coumarin	91-64-5	O=C1Oc2ccccc2C=C1	146	2	30	1	7395	5.06507	2	14523	9.94726	1
23	Diethyl maleate	141-05-9	CCOC(=O)C=CC(=O)OCC	172	4	3.27	2	818	0.475581	2	400	0.232558	2
24	Diethylenetriamine	111-40-0	NCCNCCN	103	1	3.3	2	825	0.800971	1	411	0.399029	2
25	dl-Citronellol	26489-01-0	CC(CCO)CCC=C(C)C	156	1	44	1	10875	6.97115	1	1429	0.916026	1
26	Ethyl acrylate	140-88-5	CCOC(=O)C=C	100	2	32	1	8125	8.125	3	818	0.818	1
27	Ethylenediamine	107-15-3	NCCN	60	2	2.7	2	684	1.14	1	732	1.22	1
28	Eugenol	97-53-0	COc1cc(CC=C)ccc1O	164	23	11	1	2743	1.67256	1	5926	3.61341	1
29	Farnesol	4602-84-0	CC(C)=CCCC(C)=CCCC(C)=CCO	222	2	4.7	2	1187	0.534685	1	2593	1.16802	1
30	Formaldehyde	50-00-0	C=O	30	21	1.4	2	344	1.14667	2	191	0.636667	2
31	Geraniol	106-24-1	CC(C)=CCCC(C)=CCO	154	7	18	1	4474	2.90519	2	1265	0.821429	1
32	Glutaraldehyde	111-30-8	O=CCCCC=O	100	8	0.16	3	41	0.041	1	1073	1.073	1
33	Glyoxal	107-22-2	O=CC=O	58	3	0.75	3	187	0.322414	1	345	0.594828	2
34	Hydroxycitronellal	107-75-5	CC(CCCC(C)(C)O)CC=O	172	13	23	1	5764	3.35116	8	5237	3.04477	1
35	Imidazolidinyl urea	39236-46-9	OCN1C(=O)NC(O)=C1NC(=O)NCNC(=O)NC1=C(O)NC(=O)N1CO	388	1	24	1	6000	1.54639	1	3846	0.991237	1
36	Isocyclogeraniol	68527-77-5	CC1CC(C)=CC(C)C1CO	154	1	NC	0	NC		1	6250	4.05844	1
37	Isoeugenol	97-54-1	COc1cc(C=CC)ccc1O	164	66	1.4	2	342	0.208537	2	1016	0.619512	1
38	Kanamycin	25389-94-0	NCC1OC(OC2C(N)CC(N)C(OC3OC(CO)C(O)C(N)C3O)C2O)C(O)C(O)C1O	484	1	NC	0	NC		1	1874	0.38719	1
39	Lilial	80-54-6	CC(Cc1ccc(cc1)C(C)(C)C)C=O	204	6	8.8	2	2194	1.07549	1	335545	164.483	1
40	Menthadiene-7-methyl formate	68683-20-5	CC(C)C1=CCC(CCOC=O)=CC1	194	2	NC	0	NC		1	3406	1.75567	1
41	Methyl 2-nonynoate	111-80-8	CCCCCCC#CC(=O)OC	168	1	2.5	2	625	0.372024	1	79	0.0470238	2
42	Methyl 2-octynoate	111-12-6	CCCCCC#CC(=O)OC	154	1	0.5	3	125	0.0811688	1	388	0.251948	2
43	Methylanisylidene acetone	104-27-8	CCC(=O)C=Cc1ccc(OC)cc1	190	1	9.3	2	2325	1.22368	1	412	0.216842	2
44	Methylhexanedione	13706-86-0	CC(C)CC(=O)C(C)=O	128	1	26	1	6450	5.03906	2	3258	2.54531	1
45	Methylisothiazolinone	2682-20-4	CN1SC=CC1=O	115	2	0.87	3	218	0.189565	2	223.5	0.194348	2
46	Neomycin	1405-10-3	NCC1OC(OC2C(CO)OC(OC3C(O)C(N)CC(N)C3OC3OC(CN)C(O)C(O)C3N)C2O)C(N)C(O)C1O	614	1	NC	0	NC		5	3466	0.564495	1
47	Penicillin G	61-33-6	CC1(C)SC2C(NC(=O)Cc3ccccc3)C(=O)N2C1C(O)=O	334	11	17	1	4338	1.2988	4	634	0.18982	1
48	Pentachlorophenol	87-86-5	Oc1c(Cl)c(Cl)c(Cl)c(Cl)c1Cl	266.5	1	20	1	5000	1.87617	1	2155	0.80863	1
49	Pentaerythritol triacrylate	3524-68-3	OCC(COC(=O)C=C)(COC(=O)C=C)COC(=O)C=C	298	1	NC	0	NC		1	576	0.193289	1
50	Perillaldehyde	2111-75-3	CC(=C)C1CCC(C=O)=CC1	150	3	7.9	2	1987	1.32467	1	1484	0.989333	1
51	Phenyl benzoate	93-99-2	O=C(Oc1ccccc1)c1ccccc1	198	4	9.5	2	2366	1.19495	1	52489	26.5096	1
52	Phenylacetaldehyde	122-78-1	O=CCc1ccccc1	120	3	4.99	2	1247	1.03917	5	329	0.274167	2
53	Phenylpropionaldehyde	1335-10-0	O=CCCc1ccccc1	134	1	6.3	2	1575	1.17537	1	692	0.516418	1
54	p-methylhydrocinnamic aldehyde	5406-12-2	Cc1ccc(CCC=O)cc1	148	4	18	1	4417	2.98446	1	2378	1.60676	1
55	Propylidene phthalate	17369-59-4	CCC=C1OC(=O)c2ccccc12	174	1	3.7	2	925	0.531609	1	1150	0.66092	1
56	Pyridine	110-86-1	c1ccncc1	79	1	72	1	17975	22.7532	1	41051	51.9633	1
57	Streptomycin	3810-74-0	CNC1C(O)C(O)C(CO)OC1OC1C(OC2C(O)C(O)C(N=C(N)N)C(O)C2N=C(N)N)OC(C)C1(O)C=O	581	4	NC	0	NC		6	245	0.0421687	2
58	Sulfanilamide	63-74-1	Nc1ccc(cc1)S(N)(=O)=O	172	1	NC	0	NC		1	4310	2.50581	1
59	t-2-Hexenal	6728-26-3	CCCC=CC=O	98	2	3.78	2	945	0.964286	1	49	0.05	2
60	Tetramethylthiuram disulfide	137-26-8	CN(C)C(=S)SSC(=S)N(C)C	240	2	5.6	2	1396	0.581667	2	4544	1.89333	1
61	Thioglycerol	96-27-5	OCC(O)CS	108	1	3.6	2	895	0.828704	3	1232	1.14074	1
62	α-amylcinnamyl alcohol	101-85-9	CCCCCC(CO)=Cc1ccccc1	204	2	NC	0	NC		1	12308	6.03333	1
63	δ-damascone	57378-68-4	CC=CC(=O)C1C(C)C=CCC1(C)C	192	3	3.51	2	877	0.456771	1	193	0.100521	2
64	2-Methoxy-4-methylphenol	93-51-6	COc1cc(C)ccc1O	138	1	5.8	2	1450	1.05072	1	-		0
65	4-Methoxyacetophenone	100-06-1	COc1ccc(cc1)C(C)=O	150	1	NC	0	NC		1	-		0
66	6-Methylcoumarin	92-48-8	Cc1ccc2OC(=O)C=Cc2c1	160	2	NC	0	NC		1	-		0
67	Anisyl alcohol	1331-81-3	COc1ccccc1CO	138	1	5.9	2	1475	1.06884	1	-		0
68	Benzoic acid	65-85-0	OC(=O)c1ccccc1	122	1	NC	0	NC		1	-		0
69	Benzyl benzoate	120-51-4	O=C(OCc1ccccc1)c1ccccc1	212	1	17	1	4250	2.00472	2	-		0
70	Benzyl cinnamate	103-41-3	O=C(OCc1ccccc1)C=Cc1ccccc1	238	1	18	1	4600	1.93277	2	-		0
71	Benzyl salicylate	118-58-1	Oc1ccccc1C(=O)OCc1ccccc1	228	1	2.9	2	725	0.317982	2	-		0
72	Butanol	71-36-3	CCCCO	74	1	NC	0	NC		NA	-		0
73	Citronella oil	8000-29-1	CC(CCC=C(C)C)CC=O	154	1	NC	0	NC		1	-		0
74	Cyclamen aldehyde	103-95-7	CC(C)c1ccc(cc1)C(C)CC=O	190	1	22	1	5575	2.93421	1	-		0
75	Damascone	23696-85-7	CC=CC(=O)C1=C(C)C=CCC1(C)C	190	2	1.2	2	307	0.161579	1	-		0
76	Diethyl phthalate	84-66-2	CCOC(=O)c1ccccc1C(=O)OCC	222	1	NC	0	NC		1	-		0
77	Dimethyl sulfoxide	67-68-5	CS(C)=O	78	1	72	1	18000	23.0769	1	-		0
78	d-Limonene	5989-27-5	CC(=C)C1CCC(C)=CC1	136	6	32	1	32	0.0235294	2	-		0
79	Ethyl vanillin	121-32-4	CCOc1cc(C=O)ccc1O	166	1	NC	0	NC		NA	-		0
80	Glycerol	56-81-5	OCC(O)CO	92	1	NC	0	NC		1	-		0
81	Hexane	110-54-3	CCCCCC	86	1	NC	0	NC		1	-		0
82	Hexyl cinnamic aldehyde	101-86-0	CCCCCCC(C=O)=Cc1ccccc1	216	27	8.9	2	2233	1.0338	1	-		0
83	Hexyl salicylate	6259-76-3	CCCCCCOC(=O)c1ccccc1O	222	1	0.18	3	45	0.0202703	2	-		0
84	Hydrocortisone	50-23-7	CC12CC(O)C3C(CCC4=CC(=O)CCC34C)C1CCC2(O)C(=O)CO	362	1	NC	0	NC		1	-		0
85	Isocyclemone E	54464-57-2	CC1CC2=C(CC1(C)C(C)=O)C(C)(C)CCC2	234	1	25	1	6285	2.6859	1	-		0
86	Isocyclocitral	1335-66-6	CC1C=C(C)CC(C=O)C1C	152	1	7.4	2	1838	1.20921	2	-		0
87	Isomethyl-α-ionone	127-51-5	CC(=O)C(C)=CC1C(C)=CCCC1(C)C	206	1	21.8	1	5450	2.64563	1	-		0
88	Isopropanol	67-63-0	CC(C)O	60	1	NC	0	NC		1	-		0
89	Isopropyl myristate	110-27-0	CCCCCCCCCCCCCC(=O)OC(C)C	270	1	44	1	11000	4.07407	1	-		0
90	Lead acetate	301-04-2	CC(O)=O	60	1	NC	0	NC		NA	-		0
91	Linalool	78-70-6	CC(C)=CCCC(C)(O)C=C	154	1	55	1	13750	8.92857	3	-		0
92	Lyral	31906-04-4	CC(C)(O)CCCC1=CCC(CC1)C=O	210	2	17	1	4262	2.02952	2	-		0
93	Majantal	103694-68-4	Cc1cccc(CC(C)(C)CO)c1	178	1	NC	0	NC		1	-		0
94	Methoxy dicyclopentadiene carboxaldehyde	86803-90-9	COC1CC2CC1C1CC(CC21)C=O	194	1	NC	0	NC		1	-		0
95	Methyl salicylate	119-36-8	COC(=O)c1ccccc1O	152	2	17	1	4239	2.78882	1	-		0
96	Octanoic acid	124-07-2	CCCCCCCC(O)=O	144	1	NC	0	NC		1	-		0
97	p-aminobenzoic acid	150-13-0	Nc1ccc(cc1)C(O)=O	137	1	NC	0	NC		1	-		0
98	Propylene glycol	57-55-6	CC(O)CO	76	1	NC	0	NC		2	-		0
99	Resorcinol	108-46-3	Oc1cccc(O)c1	110	2	5.9	2	1481	1.34636	1	-		0
100	Salicylic acid	69-72-7	OC(=O)c1ccccc1O	138	1	12	1	3056	2.21449	1	-		0
101	Sodium lauryl sulfate	151-21-3	CCCCCCCCCCCCOS(O)(=O)=O	266	10	4	2	1001	0.376316	1	-		0
102	Sulfanilic acid	121-57-3	Nc1ccc(cc1)S(O)(=O)=O	173	4	NC	0	NC		NA	-		0
103	Tartaric acid	87-69-4	OC(C(O)C(O)=O)C(O)=O	150	1	NC	0	NC		NA	-		0
104	Tween 80	9005-65-6	CCCCCCCCC=CCCCCCCCC(=O)OCCOCC(OCCO)C1OC(CC1OCCO)OCCO	604	1	NC	0	NC		1	-		0
105	Xylene	1330-20-7	Cc1cccc(C)c1	106	1	96	1	23950	22.5943	1	-		0
106	α-amylcinnamic aldehyde	122-40-7	CCCCCC(C=O)=Cc1ccccc1	202	5	11	1	2699	1.33614	1	-		0
107	α-damascone	24720-09-0	CC=CC(=O)C1C(C)=CCCC1(C)C	192	1	3.3	2	825	0.429687	1	-		0
108	α-methyl cinnamic aldehyde	101-39-3	CC(C=O)=Cc1ccccc1	146	1	4.5	2	1125	0.770548	2	-		0
109	β-damascone	23726-91-2	C\C=C\C(=O)C1=C(C)CCCC1(C)C		1	2.4	2	600		2	-		0
110	(Chloro)methylisothiazolinone (Kathon)	2682-20-4/26172-55-4		149.5	13	0.01	3	2.8	0.00187291	5	5	0.00334448	2
111	Aluminum chloride	7446-70-0			1	NC	0	NC		NA	-		0
112	Basil oil	8015-73-4			1	6.2	2	1550		1	-		0
113	Benzalkonium chloride	8001-54-5			1	0.07	3	17		2	-		0
114	Beryllium sulfate	7787-56-6		105.075	1	0.68	3	170		1	11	0.0104687	2
115	Clove oils	8000-34-8			3	7.1	2	1775		3	-		0
116	Cobalt (II) salts	7646-79-9; 10124-43-3			2	0.57	3	141		2	279		2
117	Copper (II) chloride	7447-39-4			1	0.4	3	100		NA	-		0
118	Geranium oil	8000-46-2			1	NC	0	NC		1	-		0
119	Gold (III) chloride	13453-07-1		232.42	1	0.48	3	120		1	98.5	0.0423802	2
120	Jasmine absolute (grandiflorum)	92457-01-7			1	5.9	2	1475		1	967		1
121	Jasmine absolute (sambac)	92457-01-8			1	36	1	9100		1	-		0
122	Lemongrass oil	8007-02-1			1	6.5	2	1625		1	-		0
123	Litsea cubeba oil	68855-99-2			1	8.4	2	2100		1	-		0
124	Manganese chloride	7773-01-5			1	NC	0	NC		NA	-		0
125	Mercuric (II) chloride	7487-94-7		271.5	1	0.39	3	98		2	225	0.0828729	2
126	Nickel (II) salts	7718-54-9; 7786-81-4			8	NC	0	NC		3	27		2
127	Oakmoss	68917-10-2			1	3.8	2	950		1	3374		1
128	Palmarosa oil	8014-19-5			1	9.6	2	2400		1	-		0
129	Peru balsam absolute	8007-00-9			1	2.5	2	625		1	862		1
130	Potassium dichromate	7778-50-9			19	0.12	3	30		3	106		2
131	Spearmint oil	8008-79-5			1	8.2	2	2050		1	-		0
132	Tea leaf absolute	84650-60-2			1	NC	0	NC		1	-		0
133	Treemoss	68648-41-9			1	NC	0	NC		1	3423		1
134	Ylang ylang	8006-81-3; 68606-83-7; 83863-30-3			1	6.8	2	1700		1	16150		1
135	Zinc sulfate	7733-02-0		161.472	1	NC	0	NC		NA	-		0

## Sheet: Predictions
#	Test Substance	CASRN	Canonical SMILES	Human data	LLNA	QSAR	Combined	Cluster
1	1-Octen-3-yl acetate	2442-10-6	CCCCCC(OC(C)=O)C=C	1	0	0	0	7
2	2,4-Dinitrochlorobenzene	97-00-7	Clc1ccc(cc1N(=O)=O)N(=O)=O	1	1	1	1	22
3	2-Hexylidene cyclopentanone	17373-89-6	CCCCCC=C1CCCC1=O	1	1	0		12
4	2-Mercaptobenzothiazole	149-30-4	Sc1nc2ccccc2s1	1	1	1	1	1
5	3,3',4',5-Tetrachlorosalicylanilide	1154-59-2	Oc1c(Cl)cc(Cl)cc1C(=O)Nc1ccc(Cl)c(Cl)c1	1	1	1	1	22
6	3,4-Dihydrocoumarin	119-84-6	O=C1CCc2ccccc2O1	1	1	0		6
7	4-phenylenediamine	106-50-3	Nc1ccc(N)cc1	1	1	1	1	2
8	Aniline	62-53-3	Nc1ccccc1	1	1	1	1	2
9	Benzisothiazolone	2634-33-5	O=C1NSc2ccccc12	1	1	1	1	1
10	Benzocaine	94-09-7	CCOC(=O)c1ccc(N)cc1	1	1	1	1	19
11	Benzoyl peroxide	94-36-0	O=C(OOC(=O)c1ccccc1)c1ccccc1	1	1	0		3
12	Benzyl alcohol	100-51-6	OCc1ccccc1	1	0	0	0	1
13	Benzylidene acetone	122-57-6	CC(=O)C=Cc1ccccc1	1	1	0		4
14	Bourgeonal	18127-01-0	CC(C)(C)c1ccc(CCC=O)cc1	1	1	1	1	11
15	Butyl glycidyl ether	2426-08-6	CCCCOCC1CO1	1	1	0		10
16	Carvone	99-49-0; 2244-16-8; 6485-40-2	CC(=C)C1CC=C(C)C(=O)C1	1	1	0		9
17	Chlorpromazine	50-53-3	CN(C)CCCN1c2ccccc2Sc2ccc(Cl)cc12	1	1	1	1	18
18	Cinnamic aldehyde	104-55-2	O=CC=Cc1ccccc1	1	1	1	1	4
19	Cinnamyl alcohol	104-54-1	OCC=Cc1ccccc1	1	1	1	1	4
20	Cinnamyl nitrile	4360-47-8	N#CC=Cc1ccccc1	1	0	1		4
21	Citral	5392-40-5	CC(C)=CCCC(C)=CC=O	1	1	0		13
22	Coumarin	91-64-5	O=C1Oc2ccccc2C=C1	1	1	1	1	6
23	Diethyl maleate	141-05-9	CCOC(=O)C=CC(=O)OCC	1	1	1	1	19
24	Diethylenetriamine	111-40-0	NCCNCCN	1	1	1	1	19
25	dl-Citronellol	26489-01-0	CC(CCO)CCC=C(C)C	1	1	0		12
26	Ethyl acrylate	140-88-5	CCOC(=O)C=C	1	1	1	1	19
27	Ethylenediamine	107-15-3	NCCN	1	1	1	1	19
28	Eugenol	97-53-0	COc1cc(CC=C)ccc1O	1	1	1	1	5
29	Farnesol	4602-84-0	CC(C)=CCCC(C)=CCCC(C)=CCO	1	1	1	1	13
30	Formaldehyde	50-00-0	C=O	1	1	1	1	20
31	Geraniol	106-24-1	CC(C)=CCCC(C)=CCO	1	1	1	1	13
32	Glutaraldehyde	111-30-8	O=CCCCC=O	1	1	1	1	10
33	Glyoxal	107-22-2	O=CC=O	1	1	1	1	20
34	Hydroxycitronellal	107-75-5	CC(CCCC(C)(C)O)CC=O	1	1	0		15
35	Imidazolidinyl urea	39236-46-9	OCN1C(=O)NC(O)=C1NC(=O)NCNC(=O)NC1=C(O)NC(=O)N1CO	1	1	1	1	18
36	Isocyclogeraniol	68527-77-5	CC1CC(C)=CC(C)C1CO	1	0	0	0	14
37	Isoeugenol	97-54-1	COc1cc(C=CC)ccc1O	1	1	0		5
38	Kanamycin	59-01-8; 8063-07-8	NCC1OC(OC2C(N)CC(N)C(OC3OC(CO)C(O)C(N)C3O)C2O)C(O)C(O)C1O	1	0	1		17
39	Lilial	80-54-6	CC(Cc1ccc(cc1)C(C)(C)C)C=O	1	1	1	1	11
40	Menthadiene-7-methyl formate	68683-20-5	CC(C)C1=CCC(CCOC=O)=CC1	1	0	0	0	9
41	Methyl 2-nonynoate	111-80-8	CCCCCCC#CC(=O)OC	1	1	1	1	7
42	Methyl 2-octynoate	111-12-6	CCCCCC#CC(=O)OC	1	1	1	1	7
43	Methylanisylidene acetone	104-27-8	CCC(=O)C=Cc1ccc(OC)cc1	1	1	1	1	5
44	Methylhexanedione	13706-86-0	CC(C)CC(=O)C(C)=O	1	1	0		7
45	Methylisothiazolinone	2682-20-4	CN1SC=CC1=O	1	1	1	1	20
46	Neomycin	1405-10-3	NCC1OC(OC2C(CO)OC(OC3C(O)C(N)CC(N)C3OC3OC(CN)C(O)C(O)C3N)C2O)C(N)C(O)C1O	1	0	1		17
47	Penicillin G	61-33-6	CC1(C)SC2C(NC(=O)Cc3ccccc3)C(=O)N2C1C(O)=O	1	1	1	1	12
48	Pentachlorophenol	87-86-5	Oc1c(Cl)c(Cl)c(Cl)c(Cl)c1Cl	1	1	1	1	22
49	Pentaerythritol triacrylate	3524-68-3	OCC(COC(=O)C=C)(COC(=O)C=C)COC(=O)C=C	1	0	1		23
50	Perillaldehyde	2111-75-3	CC(=C)C1CCC(C=O)=CC1	1	1	1	1	9
51	Phenyl benzoate	93-99-2	O=C(Oc1ccccc1)c1ccccc1	1	1	1	1	3
52	Phenylacetaldehyde	122-78-1	O=CCc1ccccc1	1	1	0		4
53	Phenylpropionaldehyde	1335-10-0	O=CCCc1ccccc1	1	1	0		6
54	p-methylhydrocinnamic aldehyde	5406-12-2	Cc1ccc(CCC=O)cc1	1	1	0		6
55	Propylidene phthalate	17369-59-4	CCC=C1OC(=O)c2ccccc12	1	1	0		1
56	Pyridine	110-86-1	c1ccncc1	1	1	1	1	2
57	Streptomycin	3810-74-0	CNC1C(O)C(O)C(CO)OC1OC1C(OC2C(O)C(O)C(N=C(N)N)C(O)C2N=C(N)N)OC(C)C1(O)C=O	1	0	1		17
58	Sulfanilamide	63-74-1	Nc1ccc(cc1)S(N)(=O)=O	1	0	1		2
59	t-2-Hexenal	6728-26-3	CCCC=CC=O	1	1	1	1	10
60	Tetramethylthiuram disulfide	137-26-8	CN(C)C(=S)SSC(=S)N(C)C	1	1	1	1	18
61	Thioglycerol	96-27-5	OCC(O)CS	1	1	0		21
62	α-amylcinnamyl alcohol	101-85-9	CCCCCC(CO)=Cc1ccccc1	1	0	0	0	8
63	δ-damascone	57378-68-4	CC=CC(=O)C1C(C)C=CCC1(C)C	1	1	0		14
64	2-Methoxy-4-methylphenol	93-51-6	COc1cc(C)ccc1O	0	1	0		5
65	4-Methoxyacetophenone	100-06-1	COc1ccc(cc1)C(C)=O	0	0	1		5
66	6-Methylcoumarin	92-48-8	Cc1ccc2OC(=O)C=Cc2c1	0	0	0	0	6
67	Anisyl alcohol	1331-81-3	COc1ccccc1CO	0	1	0		5
68	Benzoic acid	65-85-0	OC(=O)c1ccccc1	0	0	0	0	1
69	Benzyl benzoate	120-51-4	O=C(OCc1ccccc1)c1ccccc1	0	1	0		3
70	Benzyl cinnamate	103-41-3	O=C(OCc1ccccc1)C=Cc1ccccc1	0	1	0		3
71	Benzyl salicylate	118-58-1	Oc1ccccc1C(=O)OCc1ccccc1	0	1	0		3
72	Butanol	71-36-3	CCCCO	0	0	0	0	10
73	Citronella oil	26489-02-1	CC(CCC=C(C)C)CC=O	0	0	0	0	12
74	Cyclamen aldehyde	103-95-7	CC(C)c1ccc(cc1)C(C)CC=O	0	1	1	1	11
75	Damascone	23696-85-7	CC=CC(=O)C1=C(C)C=CCC1(C)C	0	1	0		14
76	Diethyl phthalate	84-66-2	CCOC(=O)c1ccccc1C(=O)OCC	0	0	1		19
77	Dimethyl sulfoxide	67-68-5	CS(C)=O	0	1	1	1	20
78	d-Limonene	5989-27-5	CC(=C)C1CCC(C)=CC1	0	1	1	1	9
79	Ethyl vanillin	121-32-4	CCOc1cc(C=O)ccc1O	0	0	0	0	5
80	Glycerol	56-81-5	OCC(O)CO	0	0	0	0	21
81	Hexane	110-54-3	CCCCCC	0	0	0	0	7
82	Hexyl cinnamic aldehyde	101-86-0	CCCCCCC(C=O)=Cc1ccccc1	0	1	0		8
83	Hexyl salicylate	6259-76-3	CCCCCCOC(=O)c1ccccc1O	0	1	0		3
84	Hydrocortisone	50-23-7	CC12CC(O)C3C(CCC4=CC(=O)CCC34C)C1CCC2(O)C(=O)CO	0	0	0	0	16
85	Isocyclemone E	54464-57-2	CC1CC2=C(CC1(C)C(C)=O)C(C)(C)CCC2	0	1	1	1	16
86	Isocyclocitral	1335-66-6	CC1CC(C)=CC(C)C1C=O	0	1	0		14
87	Isomethyl-α-ionone	127-51-5	CC(=O)C(C)=CC1C(C)=CCCC1(C)C	0	1	0		14
88	Isopropanol	67-63-0	CC(C)O	0	0	0	0	21
89	Isopropyl myristate	110-27-0	CCCCCCCCCCCCCC(=O)OC(C)C	0	1	0		23
90	Lead acetate	15347-57-6	CC(O)=O	0	0	0	0	20
91	Linalool	78-70-6	CC(C)=CCCC(C)(O)C=C	0	1	0		13
92	Lyral	31906-04-4	CC(C)(O)CCCC1=CCC(CC1)C=O	0	1	0		15
93	Majantal	103694-68-4	Cc1cccc(CC(C)(C)CO)c1	0	0	1		11
94	Methoxy dicyclopentadiene carboxaldehyde	86803-90-9	COC1CC2CC1C1CC(CC21)C=O	0	0	1		15
95	Methyl salicylate	119-36-8	COC(=O)c1ccccc1O	0	1	0		1
96	Octanoic acid	124-07-2	CCCCCCCC(O)=O	0	0	0	0	7
97	p-aminobenzoic acid	150-13-0	Nc1ccc(cc1)C(O)=O	0	0	1		2
98	Propylene glycol	57-55-6	CC(O)CO	0	0	0	0	21
99	Resorcinol	108-46-3	Oc1cccc(O)c1	0	1	0		1
100	Salicylic acid	69-72-7	OC(=O)c1ccccc1O	0	1	0		1
101	Sodium lauryl sulfate	151-21-3	CCCCCCCCCCCCOS(O)(=O)=O	0	1	0		23
102	Sulfanilic acid	121-57-3	Nc1ccc(cc1)S(O)(=O)=O	0	0	1		2
103	Tartaric acid	87-69-4	OC(C(O)C(O)=O)C(O)=O	0	0	0	0	21
104	Tween 80	9005-65-6	CCCCCCCCC=CCCCCCCCC(=O)OCCOCC(OCCO)C1OC(CC1OCCO)OCCO	0	0	1		16
105	Xylene	1330-20-7	Cc1cccc(C)c1	0	1	0		6
106	α-amylcinnamic aldehyde	122-40-7	CCCCCC(C=O)=Cc1ccccc1	0	1	0		8
107	α-damascone	24720-09-0	CC=CC(=O)C1C(C)=CCCC1(C)C	0	1	0		14
108	α-methyl cinnamic aldehyde	101-39-3	CC(C=O)=Cc1ccccc1	0	1	0		8
109	β-damascone	23726-91-2	CC=CC(=O)C1=C(C)CCCC1(C)C	0	1	0		14

## Sheet: CosIng hits
SMILES	IUPAC Names	Other names	CASRN
OCC1(F)C(F)(F)C(F)(F)C(F)(F)C(F)(F)C1(F)F	(1,2,2,3,3,4,4,5,5,6,6-undecafluorocyclohexyl)methanol	(1,2,2,3,3,4,4,5,5,6,6-undecafluorocyclohexyl)methanol
CC(COC(C)=O)C(CCCCC)OC(C)=O		(1-acetyloxy-2-methyloctan-3-yl) acetate 1-(2-acetoxy-1-methyl-ethyl)hexyl acetate acetic acid 1-(2-acetoxy-1-methylethyl)hexyl ester acetic acid 1-(2-acetoxy-1-methyl-ethyl)hexyl ester (1-acetyloxy-2-methyl-octan-3-yl) ethanoate 67634-09-7 1,3-Octanediol, 2-methyl-, diacetate 2-Methyloctane-1,3-diyl diacetate EINECS 266-812-4	67634-09-7
CC(=O)OC(c1ccccc1)C(Cl)(Cl)Cl	(2,2,2-trichloro-1-phenylethyl) acetate	(2,2,2-trichloro-1-phenylethyl) acetate (2,2,2-trichloro-1-phenyl-ethyl) acetate acetic acid (2,2,2-trichloro-1-phenylethyl) ester acetic acid (2,2,2-trichloro-1-phenyl-ethyl) ester (2,2,2-trichloro-1-phenyl-ethyl) ethanoate 126753-06-8 39347-18-7 90-17-5 AI3-02454 W523801_ALDRICH .alpha.-(Trichloromethyl)benzyl acetate Acetic acid, .alpha.-(trichloromethyl)benzyl ester Benzenemethanol, .alpha.-(…	126753-06-8 39347-18-7 90-17-5
CC1CC(C)C(COC(C)=O)C(C)C1		(2,4,6-trimethylcyclohexyl)methyl acetate acetic acid (2,4,6-trimethylcyclohexyl)methyl ester (2,4,6-trimethylcyclohexyl)methyl ethanoate 67634-05-3 2,4,6-Trimethylcyclohexylmethyl acetate Cyclohexanemethanol, 2,4,6-trimethyl-, acetate EINECS 266-808-2
OCc1ccc(Cl)cc1Cl	(2,4-dichlorophenyl)methanol	(2,4-dichlorophenyl)methanol 1777-82-8 146668_ALDRICH ZINC00157458 2,4-Dichlorobenzyl alcohol Benzenemethanol, 2,4-dichloro- Benzyl alcohol, 2,4-dichloro- Dybenal NSC15635 35448_FLUKA InChI=1/C7H6Cl2O/c8-6-2-1-5(4-10)7(9)3-6/h1-3,10H,4H 2,4-DICHLOROBENZYLALCOHOL 2,4-Dichlorobenzenemethanol 4-06-00-02597 (Beilstein Handbook Reference) AI3-20619 BRN 1448652 Benzenemethanol, 2,4-dichloro- (9CI) EINE…
C[N+](C)(C)CC(O)CC(O)=O	(2,4-dihydroxy-4-oxobutyl)-trimethylazanium	(2,4-dihydroxy-4-oxobutyl)-trimethylazanium (2,4-dihydroxy-4-oxo-butyl)-trimethyl-ammonium (2,4-dihydroxy-4-oxobutyl)-trimethylammonium (2,4-dihydroxy-4-keto-butyl)-trimethyl-ammonium (2,4-dihydroxy-4-oxo-butyl)-trimethyl-azanium NINDS_000470 KBioGR_000915 SPBio_000017 Spectrum4_000388 KBio1_000470 Spectrum_000067 IDI1_000470 Spectrum5_001473 3-HYDROXY-4-TRIMETHYLAMMONIOBUTANOATE gamma-Trimethyl-…
CCCCCCCCCCCC(=O)NCCC[N+](C)(C)CC(N)=O	(2-amino-2-oxoethyl)-[3-(dodecanoylamino)propyl]-dimethylazanium	(2-amino-2-oxoethyl)-[3-(dodecanoylamino)propyl]-dimethylazanium (2-amino-2-oxo-ethyl)-[3-(dodecanoylamino)propyl]-dimethyl-ammonium (2-amino-2-oxoethyl)-dimethyl-[3-(1-oxododecylamino)propyl]ammonium (2-amino-2-keto-ethyl)-[3-(lauroylamino)propyl]-dimethyl-ammonium (2-amino-2-oxo-ethyl)-[3-(dodecanoylamino)propyl]-dimethyl-azanium
O=C1C(Nc2ccccc12)=C1Nc2ccccc2C1=O	(2E)-2-(3-oxo-1H-indol-2-ylidene)-1H-indol-3-one	(2E)-2-(3-oxo-1H-indol-2-ylidene)-1H-indol-3-one (2E)-2-(3-oxoindolin-2-ylidene)indolin-3-one (2E)-2-(3-oxo-2-indolinylidene)-3-indolinone (2E)-2-(3-ketoindolin-2-ylidene)pseudoindoxyl 12000-74-7 12626-73-2 93660-98-1 68651-46-7 11129-41-2 ST5308404 delta(sup 2,2')-Bipseudoindoxyl ZINC03861636 NCGC00163355-01 Indigo (dye) Indigo,natural Indigo Indigo Blue (2,2'-Biindoline)-3,3'-dione (delta(sup 2…	12000-74-7 12626-73-2 93660-98-1 68651-46-7 11129-41-2
CC(=O)C(=NNc1ccc(C)cc1N(=O)=O)C(=O)Nc1ccccc1	(2E)-2-[(4-methyl-2-nitrophenyl)hydrazinylidene]-3-oxo-N-phenylbutanamide	(2E)-2-[(4-methyl-2-nitrophenyl)hydrazinylidene]-3-oxo-N-phenylbutanamide (2E)-2-[(4-methyl-2-nitro-phenyl)hydrazono]-3-oxo-N-phenyl-butanamide (2E)-2-[(4-methyl-2-nitrophenyl)hydrazono]-3-oxo-N-phenylbutanamide (2E)-3-keto-2-[(4-methyl-2-nitro-phenyl)hydrazono]-N-phenyl-butyramide (2E)-2-[(4-methyl-2-nitro-phenyl)hydrazinylidene]-3-oxo-N-phenyl-butanamide 102723-11-5 106177-71-3 11129-85-4 39310…	102723-11-5 106177-71-3 11129-85-4 39310-24-2 7383-22-4
Cc1cc(Cl)cc2c1SC(=C1Sc3c(cc(Cl)cc3C)C1=O)C2=O	(2E)-5-chloro-2-(5-chloro-7-methyl-3-oxo-1-benzothiophen-2-ylidene)-7-methyl-1-benzothiophen-3-one	(2E)-5-chloro-2-(5-chloro-7-methyl-3-oxo-1-benzothiophen-2-ylidene)-7-methyl-1-benzothiophen-3-one (2E)-5-chloro-2-(5-chloro-7-methyl-3-oxo-benzothiophen-2-ylidene)-7-methyl-benzothiophen-3-one (2E)-5-chloro-2-(5-chloro-7-methyl-3-oxo-2-benzothiophenylidene)-7-methyl-3-benzothiophenone (2E)-5-chloro-2-(5-chloro-3-keto-7-methyl-benzothiophen-2-ylidene)-7-methyl-benzothiophen-3-one 5-Chloro-2-(5-ch…
Cc1cc(Cl)cc2SC(=C3Sc4cc(Cl)cc(C)c4C3=O)C(=O)c12		(2E)-6-chloro-2-(6-chloro-4-methyl-3-oxo-1-benzothiophen-2-ylidene)-4-methyl-1-benzothiophen-3-one (2E)-6-chloro-2-(6-chloro-4-methyl-3-oxo-benzothiophen-2-ylidene)-4-methyl-benzothiophen-3-one (2E)-6-chloro-2-(6-chloro-4-methyl-3-oxo-2-benzothiophenylidene)-4-methyl-3-benzothiophenone (2E)-6-chloro-2-(6-chloro-3-keto-4-methyl-benzothiophen-2-ylidene)-4-methyl-benzothiophen-3-one ZINC04529848 ST5…
O=C(C=CC=Cc1cc2OCOc2cc1)N1CCCCC1	(2E,4E)-5-(1,3-benzodioxol-5-yl)-1-piperidin-1-ylpenta-2,4-dien-1-one 5-(1,3-benzodioxol-5-yl)-1-piperidin-1-ylpenta-2,4-dien-1-one	(2E,4E)-5-(1,3-benzodioxol-5-yl)-1-piperidin-1-ylpenta-2,4-dien-1-one 5-(1,3-benzodioxol-5-yl)-1-piperidin-1-ylpenta-2,4-dien-1-one (2E,4E)-5-(1,3-benzodioxol-5-yl)-1-(1-piperidyl)penta-2,4-dien-1-one 5-(1,3-benzodioxol-5-yl)-1-(1-piperidyl)penta-2,4-dien-1-one 5-(1,3-benzodioxol-5-yl)-1-piperidino-penta-2,4-dien-1-one (2E,4E)-5-(1,3-benzodioxol-5-yl)-1-piperidino-penta-2,4-dien-1-one 5-(1,3-benz…	147030-08-8 94-62-2 7780-20-3
CC(C)=CCCC(COC(C)=O)C=C	(2-ethenyl-6-methylhept-5-enyl) acetate	(2-ethenyl-6-methylhept-5-enyl) acetate (6-methyl-2-vinyl-hept-5-enyl) acetate acetic acid (6-methyl-2-vinylhept-5-enyl) ester acetic acid (6-methyl-2-vinyl-hept-5-enyl) ester (2-ethenyl-6-methyl-hept-5-enyl) ethanoate Acetylated myrcene EINECS 270-162-7 Myrcenylacetat
CC(=O)Oc1ccc(CC=C)cc1OC	(2-methoxy-4-prop-2-enylphenyl) acetate	(2-methoxy-4-prop-2-enylphenyl) acetate (4-allyl-2-methoxy-phenyl) acetate acetic acid (4-allyl-2-methoxyphenyl) ester acetic acid (4-allyl-2-methoxy-phenyl) ester (2-methoxy-4-prop-2-enyl-phenyl) ethanoate 93-28-7 InChI=1/C12H14O3/c1-4-5-10-6-7-11(15-9(2)13)12(8-10)14-3/h4,6-8H,1,5H2,2-3H C14567 1,3,4-Eugenol acetate 1-Acetoxy-2-methoxy-4-allylbenzene 4-Allyl-2-methoxyphenol acetate 4-Allyl-2-me…	93-28-7
COc1ccccc1OC(=O)Cc1ccccc1		(2-methoxyphenyl) 2-phenylacetate 2-phenylacetic acid (2-methoxyphenyl) ester (2-methoxyphenyl) 2-phenylethanoate 4112-89-4 2-METHOXYPHENYL PHENYLACETATE Acetic acid, phenyl-, O-methoxyphenyl ester Benzeneacetic acid, 2-methoxyphenyl ester EINECS 223-898-8 FEMA No. 2535 Guaiacol phenylacetate Guaiacyl phenylacetate Methoxyphenyl phenylacetate, o- Methylcatechol acetate, o- W253502_ALDRICH Guaiacy…
CC(=O)OC(C)(C)CCCC(=C)C=C	(2-methyl-6-methylideneoct-7-en-2-yl) acetate	(2-methyl-6-methylideneoct-7-en-2-yl) acetate (1,1-dimethyl-5-methylene-hept-6-enyl) acetate acetic acid (1,1-dimethyl-5-methylenehept-6-enyl) ester acetic acid (1,1-dimethyl-5-methylene-hept-6-enyl) ester (2-methyl-6-methylidene-oct-7-en-2-yl) ethanoate 1118-39-4 69103-01-1 2-Methyl-6-methylene-7-octen-2-yl acetate 3-Methylene-7-methyl-1-octen-7-yl acetate 4-02-00-00205 (Beilstein Handbook Refer…	1118-39-4 69103-01-1
O=C1c2c(SC1=C1Sc3c(c(Cl)ccc3Cl)C1=O)c(Cl)ccc2Cl		(2Z)-4,7-dichloro-2-(4,7-dichloro-3-oxo-1-benzothiophen-2-ylidene)-1-benzothiophen-3-one (2Z)-4,7-dichloro-2-(4,7-dichloro-3-oxo-benzothiophen-2-ylidene)benzothiophen-3-one (2Z)-4,7-dichloro-2-(4,7-dichloro-3-oxo-2-benzothiophenylidene)-3-benzothiophenone (2Z)-4,7-dichloro-2-(4,7-dichloro-3-keto-benzothiophen-2-ylidene)benzothiophen-3-one 12236-65-6 129653-92-5 14295-43-3 4,4',7,7'-Tetrachlorothi…	12236-65-6 129653-92-5 14295-43-3
CC1CC(CO)CC(C)=C1		(3,5-dimethyl-1-cyclohex-3-enyl)methanol 67634-16-6 3,5-Dimethylcyclohexene-1-methanol 3-Cyclohexene-1-methanol, 3,5-dimethyl- EINECS 266-820-8	67634-16-6
CC(=O)OCC1CC(C)CC(C)C1	(3,5-dimethylcyclohexyl)methyl acetate	(3,5-dimethylcyclohexyl)methyl acetate acetic acid (3,5-dimethylcyclohexyl)methyl ester (3,5-dimethylcyclohexyl)methyl ethanoate 68213-86-5 3,5-Dimethylcyclohexylmethyl acetate Cyclohexanemethanol, 3,5-dimethyl-, acetate EINECS 269-269-1	68213-86-5
CC(C)C(=O)OCC(C)(C)C(O)C(C)C		(3-hydroxy-2,2,4-trimethylpentyl) 2-methylpropanoate (3-hydroxy-2,2,4-trimethyl-pentyl) 2-methylpropanoate 2-methylpropanoic acid (3-hydroxy-2,2,4-trimethylpentyl) ester 2-methylpropionic acid (3-hydroxy-2,2,4-trimethyl-pentyl) ester 129383-05-7 141136-23-4 25134-27-4 25265-77-4 77-68-9 80525-37-7 1,3-Pentanediol, 2,2,4-trimethyl-, monoisobutyrate 2,2,4-Trimethyl-1,3-pentanediol monoisobutyrate 2…	129383-05-7 141136-23-4 25134-27-4 25265-77-4 77-68-9 80525-37-7
CC(=O)Nc1ccc(cc1)OC(=O)c1ccccc1O	(4-acetamidophenyl) 2-hydroxybenzoate	(4-acetamidophenyl) 2-hydroxybenzoate 2-hydroxybenzoic acid (4-acetamidophenyl) ester 118-57-0 Spectrum2_001431 KBio2_000637 KBio2_003205 KBio2_005773 Spectrum4_001035 SPBio_001562 IDI1_000629 DivK1c_000629 NINDS_000629 KBioGR_001589 SPECTRUM1501170 KBio1_000629 NCGC00094917-02 Spectrum5_001149 NCGC00094917-01 Spectrum3_000936 KBio3_001972 2-Hydroxybenzoic acid, 4-(acetylamino)phenyl-, ester 4'-H…	118-57-0
O=S(=O)(Oc1ccc(Cl)cc1)c1ccc(Cl)cc1	(4-chlorophenyl) 4-chlorobenzenesulfonate	(4-chlorophenyl) 4-chlorobenzenesulfonate 4-chlorobenzenesulfonic acid (4-chlorophenyl) ester 80-33-1 (4-Chloor-fenyl)-4-chloor-benzeen-sulfonaat (4-Chlor-phenyl)-4-chlor-benzol-sulfonate (4-Cloro-fenil)-4-cloro-venzol-solfonato 4-Chlorobenzenesulfonate de 4-chlorophenyle 4-Chlorophenyl 4-chlorobenzenesulfonate Acaricydol E 20 Benzenesulfonic acid, 4-chloro-, 4-chlorophenyl ester Benzenesulfonic …	80-33-1
CC(C)=CCCC(C)=CCC(C)(C)C#N		(4E)-2,2,5,9-tetramethyldeca-4,8-dienenitrile 58260-78-9 2,2,5,9-Tetramethyl-4,8-decadienenitrile 4,8-Decadienenitrile, 2,2,5,9-tetramethyl- AI3-28395 EINECS 261-191-6	58260-78-9
CCOc1ccc(cc1)NN=C1C=CC(=O)c2ccccc12	(4E)-4-[(4-ethoxyphenyl)hydrazinylidene]naphthalen-1-one 4-[(4-ethoxyphenyl)hydrazinylidene]naphthalen-1-one	(4E)-4-[(4-ethoxyphenyl)hydrazinylidene]naphthalen-1-one 4-[(4-ethoxyphenyl)hydrazinylidene]naphthalen-1-one 4-[(4-ethoxyphenyl)hydrazono]naphthalen-1-one (4E)-4-[(4-ethoxyphenyl)hydrazono]naphthalen-1-one 4-[(4-ethoxyphenyl)hydrazono]-1-naphthalenone (4E)-4-[(4-ethoxyphenyl)hydrazono]-1-naphthalenone 6535-42-8 70699-55-7 1-Naphthalenol, 4-((4-ethoxyphenyl)azo)- 4-((4-Ethoxyphenyl)azo)-1-naphthal…	6535-42-8 70699-55-7
CCCCC=CCC=CCCCCC=CC=CCCC(O)=O		(4E,6E,12E,15E)-icosa-4,6,12,15-tetraenoic acid
CCC=CCC=CCC=CCC=CCC=CCC=CCCC(O)=O		(4E,7E,10E,13E,16E,19E)-docosa-4,7,10,13,16,19-hexaenoic acid DOCOSA-4,7,10,13,16,19-HEXAENOIC ACID 2091-24-9 KBio2_000018 KBio2_002586 KBio2_005154 KBioGR_000018 KBioSS_000018 Bio1_000721 Bio2_000018 Bio1_001210 Bio1_000232 Bio2_000498 CBiol_001946 KBio3_000035 KBio3_000036 (4Z,7E,10E,13E,16Z,19E)-docosa-4,7,10,13,16,19-hexaenoic acid
Oc1ccc(cc1)OC(=O)C1CCC(=O)N1	(4-hydroxyphenyl) 5-oxopyrrolidine-2-carboxylate	(4-hydroxyphenyl) 5-oxopyrrolidine-2-carboxylate 5-oxo-2-pyrrolidinecarboxylic acid (4-hydroxyphenyl) ester 5-ketopyrrolidine-2-carboxylic acid (4-hydroxyphenyl) ester
Cc1ccc(cc1)OC(=O)CC(=O)c1ccccc1	(4-methylphenyl) 3-oxo-3-phenylpropanoate	(4-methylphenyl) 3-oxo-3-phenylpropanoate (4-methylphenyl) 3-oxo-3-phenyl-propanoate 3-oxo-3-phenylpropanoic acid (4-methylphenyl) ester 3-keto-3-phenyl-propionic acid (4-methylphenyl) ester 67801-43-8 EINECS 267-164-5 p-Tolyl 3-oxo-3-phenylpropionate Benzenepropanoic acid, beta-oxo-, 4-methylphenyl ester	67801-43-8
CC(=O)Oc1ccc(cc1)C(C)(C)C	(4-tert-butylphenyl) acetate	(4-tert-butylphenyl) acetate acetic acid (4-tert-butylphenyl) ester (4-tert-butylphenyl) ethanoate 3056-64-2 4-tert-Butylphenyl acetate Acetic acid p-tert-butylphenyl ester AI3-18022 EINECS 221-288-6 NSC 6839 Phenol, 4-(1,1-dimethylethyl)-, acetate p-tert-Butylphenyl acetate NSC6839	3056-64-2
CC(CCC=O)=C1CC=C(C)CC1	(4Z)-4-(4-methyl-1-cyclohex-3-enylidene)pentanal	(4Z)-4-(4-methyl-1-cyclohex-3-enylidene)pentanal (4Z)-4-(4-methyl-1-cyclohex-3-enylidene)valeraldehyde 32540-03-7 53585-11-8 53585-12-9 4-(4-Methyl-3-cyclohexen-1-ylidene)pentanal Pentanal, 4-(4-methyl-3-cyclohexen-1-ylidene)- Pentanal, 4-(4-methyl-3-cyclohexen-1-ylidene)-, (4E)- Pentanal, 4-(4-methyl-3-cyclohexen-1-ylidene)-, (E)- Pentanal, 4-(4-methyl-3-cyclohexen-1-ylidene)-, (4Z)- Pentanal, 4…	32540-03-7 53585-11-8 53585-12-9
CC(C)=CCCC(C)=CCCC(C)=CCCC(C)(O)CC	(6E,10E)-3,7,11,15-tetramethylhexadeca-6,10,14-trien-3-ol	(6E,10E)-3,7,11,15-tetramethylhexadeca-6,10,14-trien-3-ol 70851-60-4 6,10,14-Hexadecatrien-3-ol, 3,7,11,15-tetramethyl- Dihydro geranyl linalool EINECS 274-941-2 Pseudo phytol 3,7,11,15-Hexadeca-6,10,14-trien-3-ol 3,7,11,15-Tetramethyl-6,10,14-hexadecatrien-3-ol	70851-60-4
CCCCCC=CCC=CCCCCCCCC(=O)NC(CC)N(C)C		(9E,12E)-N-(1-dimethylaminopropyl)octadeca-9,12-dienamide
CCCCCC=CCC=CCCCCCCCC(=O)N(CCO)CCO	(9E,12E)-N,N-bis(2-hydroxyethyl)octadeca-9,12-dienamide N,N-bis(2-hydroxyethyl)octadeca-9,12-dienamide	(9E,12E)-N,N-bis(2-hydroxyethyl)octadeca-9,12-dienamide N,N-bis(2-hydroxyethyl)octadeca-9,12-dienamide 56863-02-6 (9Z,12Z)-N,N-Bis(2-hydroxyethyl)octadeca-9,12-dien-1-amide 9,12-OCTADECADIENAMIDE, N,N-BIS(2-HYDROXYETHYL)- 9,12-Octadecadienamide, N,N-bis(2-hydroxyethyl)-, (9Z,12Z)- 9,12-Octadecadienamide, N,N-bis(2-hydroxyethyl)-, (Z,Z)- Arcalon 16 Clindrol LT 15-73-1 Comperlan F Cycloamide ND Cyc…	56863-02-6
C[Si](C)(C)O[Si](O[Si](c1ccccc1)(c1ccccc1)c1ccccc1)(c1ccccc1)c1ccccc1	(di(phenyl)-trimethylsilyloxysilyl)oxy-tri(phenyl)silane	(di(phenyl)-trimethylsilyloxysilyl)oxy-tri(phenyl)silane (di(phenyl)-trimethylsilyloxy-silyl)oxy-tri(phenyl)silane
COC(CC)OCCC=CCC	(E)-1-(1-Methoxypropoxy)hex-3-ene	(E)-1-(1-Methoxypropoxy)hex-3-ene 97358-55-9 97358-54-8 3-Hexene, 1-(1-methoxypropoxy)-, (E)- EINECS 306-628-4 3-Hexene, 1-(1-methoxypropoxy)-, (Z)- EINECS 306-630-5 (Z)-1-(1-methoxypropoxy)hex-3-ene	97358-55-9 97358-54-8
CC(OCCC=CCC)OCCC=CCC	(E)-1-[1-[(E)-hex-3-enoxy]ethoxy]hex-3-ene	(E)-1-[1-[(E)-hex-3-enoxy]ethoxy]hex-3-ene
CCCCCCC(O)CC=CCCCCCCCC(=O)NCCO		(E)-12-hydroxy-N-(2-hydroxyethyl)octadec-9-enamide 106-16-1 9-Octadecenamide, 12-hydroxy-N-(2-hydroxyethyl)-, (9Z,12R)- EINECS 203-368-2 Monoethanolamine ricinoleic acid amide N-(2-Hydroxyethyl)-12-hydroxy-9-octadecenamide N-(2-Hydroxyethyl)ricinoleamide Ricinoleamide MEA Ricinoleoyl monoethanolamide (R)-12-Hydroxy-N-(2-hydroxyethyl)oleamide 12-Hydroxy-9-octadecenamide, N-(2-hydroxyethyl)- 9-Octa…	106-16-1
CC(C=O)C=CC1C(C)=CCCC1(C)C	(E)-2-methyl-4-(2,6,6-trimethyl-1-cyclohex-2-enyl)but-3-enal	(E)-2-methyl-4-(2,6,6-trimethyl-1-cyclohex-2-enyl)but-3-enal
CC(C)CCCC(C)CCCC(C)CCCC(C)=CCO	(E)-3,7,11,15-tetramethylhexadec-2-en-1-ol 3,7,11,15-Tetramethylhexadec-2-en-1-ol	(E)-3,7,11,15-tetramethylhexadec-2-en-1-ol 3,7,11,15-Tetramethylhexadec-2-en-1-ol 102608-53-7 139912_ALDRICH (2E)-3,7,11,15-Tetramethyl-2-hexadecen-1-ol W502200_ALDRICH 2-Hexadecen-1-ol, 3,7,11,15-tetramethyl-, [R-[R*,R*-(E)]]- 80191_FLUKA	102608-53-7
CC(=O)C=CC(C)c1ccccc1		(E)-5-phenylhex-3-en-2-one 5-Phenylhex-3-en-2-one 60405-50-7 EINECS 262-221-0 3-Hexen-2-one, 5-phenyl-	60405-50-7
CC(C)CC=CCCO	(E)-6-Methylhept-3-en-1-ol	(E)-6-Methylhept-3-en-1-ol 1335-09-7 87677-91-6 68900-88-9 3-Hepten-1-ol, 6-methyl-, (3E)- EINECS 272-640-0 trans-6-Methyl-3-hepten-1-ol 6-Hepten-2-ol, 6-methyl- 6-Methyl-6-hepten-2-ol EINECS 215-619-3 Heptenol, methyl- METHYLHEPTENOL	1335-09-7 87677-91-6 68900-88-9
CCCCCCCC=CC=O		(E)-dec-2-enal dec-2-enal 3913-81-3 25447-70-5 LMFA06000053 W236608_ALDRICH 2-Decen-1-al 3-Heptylacrolein AI3-36267 Decenaldehyde Decylenic aldehyde EINECS 223-472-1 FEMA No. 2366 NSC 20747 30658_FLUKA (E)-2-Decenal 2-DECENAL (E) 2-Decenal, (2E)- 2-Decenal, (E)- EINECS 223-474-2 trans-2-Decenal	3913-81-3 25447-70-5
CCCCCCCCCC=CC=O	(E)-dodec-2-enal dodec-2-enal	(E)-dodec-2-enal dodec-2-enal 20407-84-5 2-Dodecen-1-al 2-Dodecenal, (E)- (E)-2-Dodecen-1-al (E)-Dodec-2-en-1-al 2-Dodecenal, (2E)- W240206_ALDRICH EINECS 243-797-2 trans-2-Dodecen-1-al 2-Dodecenal (natural) 3-Nonylacrolein AI3-36266 Dodec-2-en-1-al EINECS 225-402-5 FEMA No. 2402 NSC 22287 beta-Octyl acrolein LMFA06000072 trans-2-Dodecenal	20407-84-5
CCCCCCCCC=CCC=O	(E)-dodec-3-enal	(E)-dodec-3-enal 68083-57-8 (E)-3-Dodecenal 3-Dodecenal EINECS 268-406-2 3-dodecenal, E Dodec-3-en-1-al	68083-57-8
CCCCCCC(O)CC=CCCCCCCCC(=O)NCCCN(C)C	(E)-N-(3-dimethylaminopropyl)-12-hydroxyoctadec-9-enamide	(E)-N-(3-dimethylaminopropyl)-12-hydroxyoctadec-9-enamide (E)-N-(3-dimethylaminopropyl)-12-hydroxy-octadec-9-enamide
CCCCCCCCC=CCCCCCCCC[N+](C)(C)[O-]		(E)-N,N-dimethyloctadec-9-en-1-amine oxide 61792-38-9
Cc1ccccc1N(CC)C(=O)C=CC	(E)-N-ethyl-N-(2-methylphenyl)but-2-enamide N-ethyl-N-(2-methylphenyl)but-2-enamide	(E)-N-ethyl-N-(2-methylphenyl)but-2-enamide N-ethyl-N-(2-methylphenyl)but-2-enamide 483-63-6 NSC78382 BSPBio_002722 SMR000059145 BPBio1_001038 2-Butenamide, N-ethyl-N-(2-methylphenyl)- 3-12-00-01856 (Beilstein Handbook Reference) AI3-17732 BRN 3275497 Caswell No. 431B Crotalgin Crotamiton Crotamiton [BAN:INN:JAN] Crotamitone Crotamitonum [INN-Latin] Crotonyl-N-ethyl-o-toluidine EINECS 207-596-3 E…	483-63-6
CCCC=CCCC(C)=O	(E)-non-5-en-2-one	(E)-non-5-en-2-one 27039-84-5 (5E)-5-Nonen-2-one 5-Nonen-2-one EINECS 248-181-7	27039-84-5
CCC=CCCC(C)=O	(E)-Oct-5-en-2-one	(E)-Oct-5-en-2-one 19093-20-0 5-Octen-2-one, (5E)- 5-Octen-2-one, (E)- EINECS 242-810-9
CC=CCCCCCCCC=O	(E)-undec-9-enal	(E)-undec-9-enal 143-14-6 Undec-9-en-1-al 9-Hendecenal 9-UNDECENAL Aldehyde C-11 undecylenic EINECS 205-586-3 FEMA No. 3094 Undecenoic aldehyde	143-14-6
C[Si](C)(C)O[Si](C)(C)OC	(methoxy-dimethylsilyl)oxy-trimethylsilane	(methoxy-dimethylsilyl)oxy-trimethylsilane (methoxy-dimethyl-silyl)oxy-trimethyl-silane 18156-38-2 Disiloxane, methoxypentamethyl- Pentamethylmethoxydisiloxane	18156-38-2
ON=CCc1ccccc1	(NE)-N-(2-phenylethylidene)hydroxylamine N-(2-phenylethylidene)hydroxylamine	(NE)-N-(2-phenylethylidene)hydroxylamine N-(2-phenylethylidene)hydroxylamine 2-phenylacetaldehyde oxime 2-phenylacetaldoxime 7028-48-0 BRN 2040645 EINECS 230-309-8 Benzeneacetaldehyde, oxime NSC203259 CHEBI:47791 Z-Phenylacetaldoxime (1E)-phenylacetaldehyde oxime (E)-phenylacetaldoxime CHEBI:47793 Phenylacetaldehyde oxime NSC 203259 Phenylacetaldoxime c0646 4-07-00-00665 (Beilstein Handbook Refer…	7028-48-0
CC(CC(CC)=NO)CC	(NZ)-N-(5-methylheptan-3-ylidene)hydroxylamine	(NZ)-N-(5-methylheptan-3-ylidene)hydroxylamine
CC(C)C=C(C=O)c1ccccc1	(Z)-4-methyl-2-phenylpent-2-enal 4-methyl-2-phenylpent-2-enal	(Z)-4-methyl-2-phenylpent-2-enal 4-methyl-2-phenylpent-2-enal (Z)-4-methyl-2-phenyl-pent-2-enal 4-methyl-2-phenyl-pent-2-enal Benzeneacetaldehyde, .alpha.-(2-methylpropylidene)- W320005_ALDRICH
CC(C)=CCCC(C)=CCOC(=O)C(C)C	[(2E)-3,7-dimethylocta-2,6-dienyl] 2-methylpropanoate 3,7-dimethylocta-2,6-dienyl 2-methylpropanoate	[(2E)-3,7-dimethylocta-2,6-dienyl] 2-methylpropanoate 3,7-dimethylocta-2,6-dienyl 2-methylpropanoate 2-methylpropanoic acid 3,7-dimethylocta-2,6-dienyl ester 2-methylpropanoic acid [(2E)-3,7-dimethylocta-2,6-dienyl] ester 2-methylpropionic acid [(2E)-3,7-dimethylocta-2,6-dienyl] ester 2-methylpropionic acid 3,7-dimethylocta-2,6-dienyl ester 2345-26-8 2,6-Octadien-1-ol, 3,7-dimethyl-, isobutyrate,…	2345-26-8
CCC=CCCC=CCOC(C)=O	[(2E,6E)-nona-2,6-dienyl] acetate	[(2E,6E)-nona-2,6-dienyl] acetate acetic acid [(2E,6E)-nona-2,6-dienyl] ester [(2E,6E)-nona-2,6-dienyl] ethanoate 67674-47-9 2(E)-6(E)-Nonadienyl acetate 2,6-Nonadien-1-ol, acetate, (2E,6E)- 2,6-Nonadien-1-ol, acetate, (E,E)- EINECS 266-886-8 (2E,6E)-Nona-2,6-dienyl acetate	67674-47-9
COC(=O)OC1CCCC=CCC1	[(4Z)-1-cyclooct-4-enyl] methyl carbonate	[(4Z)-1-cyclooct-4-enyl] methyl carbonate carbonic acid [(4Z)-1-cyclooct-4-enyl] methyl ester Carbonate de cyclooct-4-ene-1-yle et de methyle [French] Carbonato de ciclooct-4-en-1-ilo y metilo [Spanish] Carbonato de ciclooct-4-eno-1-ilo e metilo [Portuguese] Carbonato di cicloott-4-en-1-ile e metile [Italian] Cyclooct-4-een-1-ylmethylcarbonaat [Dutch] Cyclooct-4-en-1-yl methyl carbonate Cyclooct-…
CC(C)=CCCC(C)=CCCC(C)OC(C)=O		[(5E)-6,10-dimethylundeca-5,9-dien-2-yl] acetate 6,10-dimethylundeca-5,9-dien-2-yl acetate [(4E)-1,5,9-trimethyldeca-4,8-dienyl] acetate 1,5,9-trimethyldeca-4,8-dienyl acetate acetic acid 1,5,9-trimethyldeca-4,8-dienyl ester acetic acid [(4E)-1,5,9-trimethyldeca-4,8-dienyl] ester 6,10-dimethylundeca-5,9-dien-2-yl ethanoate [(5E)-6,10-dimethylundeca-5,9-dien-2-yl] ethanoate 121469-35-0 3239-35-8 5…	121469-35-0 3239-35-8 50373-57-4 91482-37-0
C[N+](C)(C)c1cc2C(=NNc3ccc(N)cc3)C(=O)C=Cc2cc1	[(8Z)-8-[(4-aminophenyl)hydrazinylidene]-7-oxonaphthalen-2-yl]-trimethylazanium	[(8Z)-8-[(4-aminophenyl)hydrazinylidene]-7-oxonaphthalen-2-yl]-trimethylazanium [(8Z)-8-[(4-aminophenyl)hydrazono]-7-oxo-2-naphthyl]-trimethyl-ammonium [(8Z)-8-[(4-aminophenyl)hydrazono]-7-oxo-2-naphthyl]-trimethylammonium [(8Z)-8-[(4-aminophenyl)hydrazono]-7-keto-2-naphthyl]-trimethyl-ammonium [(8Z)-8-[(4-aminophenyl)hydrazinylidene]-7-oxo-naphthalen-2-yl]-trimethyl-azanium
CC(C)CCCC(C)CCCC(C)CCCC(C)=CCOC(C)=O	[(E)-3,7,11,15-tetramethylhexadec-2-enyl] acetate	[(E)-3,7,11,15-tetramethylhexadec-2-enyl] acetate acetic acid [(E)-3,7,11,15-tetramethylhexadec-2-enyl] ester [(E)-3,7,11,15-tetramethylhexadec-2-enyl] ethanoate Phytol acetate
CC(=CCOC(C)=O)c1ccccc1		[(E)-3-phenylbut-2-enyl] acetate 3-phenylbut-2-enyl acetate acetic acid [(E)-3-phenylbut-2-enyl] ester acetic acid 3-phenylbut-2-enyl ester [(E)-3-phenylbut-2-enyl] ethanoate 3-phenylbut-2-enyl ethanoate 20883-16-3 3-Phenyl-2-buten-1-ol acetate 3-Phenyl-2-butenyl acetate EINECS 244-098-5 2-Buten-1-ol, 3-phenyl-, acetate	20883-16-3
C[N+](C)(CC=CC[N+](CCO)(CCO)CCO)CC=CC[N+](CCO)(CCO)CCO	[(E)-4-[dimethyl-[(E)-4-[tris(2-hydroxyethyl)azaniumyl]but-2-enyl]azaniumyl]but-2-enyl]-tris(2-hydroxyethyl)azanium	[(E)-4-[dimethyl-[(E)-4-[tris(2-hydroxyethyl)azaniumyl]but-2-enyl]azaniumyl]but-2-enyl]-tris(2-hydroxyethyl)azanium [(E)-4-[dimethyl-[(E)-4-[tris(2-hydroxyethyl)ammonio]but-2-enyl]ammonio]but-2-enyl]-tris(2-hydroxyethyl)ammonium
CCCC=CCCOC(C)=O	[(E)-hept-3-enyl] acetate	[(E)-hept-3-enyl] acetate acetic acid [(E)-hept-3-enyl] ester [(E)-hept-3-enyl] ethanoate 1576-77-8 1576-78-9 trans-3-Heptenyl acetate 3-Hepten-1-ol, acetate 3-Hepten-1-yl acetate (Z)-Hept-3-enyl acetate 3-Hepten-1-ol, acetate, (3Z)- 3-Hepten-1-ol, acetate, (Z)- EINECS 216-412-0 cis-3-Heptenyl acetate (E)-Hept-3-enyl acetate 3-Hepten-1-ol, acetate, (3E)- 3-Hepten-1-ol, acetate, (E)- 3-Heptenyl ac…	1576-77-8 1576-78-9
CCCC=CCOC(=O)Cc1ccccc1		[(E)-hex-2-enyl] 2-phenylacetate 2-phenylacetic acid [(E)-hex-2-enyl] ester [(E)-hex-2-enyl] 2-phenylethanoate 68133-78-8 71605-86-2 2-Hexenyl phenylacetate EINECS 275-666-0 (E)-Hex-2-enyl phenylacetate Benzeneacetic acid, (2E)-2-hexenyl ester Benzeneacetic acid, 2-hexenyl ester, (E)- EINECS 268-705-8 trans-2-Hexenyl phenylacetate	68133-78-8 71605-86-2
CCCC=CCOC(=O)CC(C)C	[(E)-hex-2-enyl] 3-methylbutanoate	[(E)-hex-2-enyl] 3-methylbutanoate 3-methylbutanoic acid [(E)-hex-2-enyl] ester 3-methylbutyric acid [(E)-hex-2-enyl] ester 68698-59-9 Butanoic acid, 3-methyl-, (2E)-2-hexenyl ester (2E)-2-Hexenyl 3-methylbutanoate EINECS 272-088-0 trans-2-Hexenyl isovalerate Butanoic acid, 3-methyl-, 2-hexenyl ester, (E)- (E)-Hex-2-enyl isovalerate	68698-59-9
CCCC=CCOC(C)=O	[(E)-hex-2-enyl] acetate Hex-2-enyl acetate	[(E)-hex-2-enyl] acetate Hex-2-enyl acetate acetic acid [(E)-hex-2-enyl] ester acetic acid hex-2-enyl ester [(E)-hex-2-enyl] ethanoate hex-2-enyl ethanoate 10094-40-3 (2E)-2-Hexenyl acetate Methylphosphonic acid, bis(1,3-dimethylbutyl) ester 2-Hexen-1-ol, acetate EINECS 233-223-9 (Z)-2-Hexenyl acetate W256404_ALDRICH ZINC02036101 302503_ALDRICH
CCCC=CCOC(=O)CCCCC	[(E)-hex-2-enyl] hexanoate	[(E)-hex-2-enyl] hexanoate hexanoic acid [(E)-hex-2-enyl] ester 53398-86-0 (E)Hex-2-enyl hexanoate AI3-35968 EINECS 258-519-5 Hexanoic acid, (2E)-2-hexenyl ester Hexanoic acid, 2-hexenyl ester, (E)- trans-2-Hexenyl caproate trans-2-Hexenyl caproate (hexanoate) (Z)-2-Hexenyl hexanoate	53398-86-0
CCCC=CCOC(=O)CC	[(E)-hex-2-enyl] propanoate	[(E)-hex-2-enyl] propanoate propanoic acid [(E)-hex-2-enyl] ester propionic acid [(E)-hex-2-enyl] ester 53398-80-4 139729-91-2 trans-2-Hexenyl propionate (Z)-2-Hexenyl propanoate Cycloheptyl dipropylamidocyanidophosphate (E)-2-Hexenyl propionate (E)-Hex-2-enyl propionate 2-HEXEN-1-OL, PROPANOATE, (E)- 2-Hexen-1-ol, propanoate, (2E)- 2-Hexenyl propanoate AI3-35969 EINECS 258-513-2
CCC=CCCOC(=O)c1ccccc1N	[(E)-hex-3-enyl] 2-aminobenzoate	[(E)-hex-3-enyl] 2-aminobenzoate 2-aminobenzoic acid [(E)-hex-3-enyl] ester
CC(CC)C(=O)OCCC=CCC	[(E)-hex-3-enyl] 2-methylbutanoate Hex-3-enyl 2-methylbutanoate	[(E)-hex-3-enyl] 2-methylbutanoate Hex-3-enyl 2-methylbutanoate 2-methylbutanoic acid hex-3-enyl ester 2-methylbutanoic acid [(E)-hex-3-enyl] ester 2-methylbutyric acid hex-3-enyl ester 2-methylbutyric acid [(E)-hex-3-enyl] ester
CCC=CCCOC(=O)C(C)C	[(E)-hex-3-enyl] 2-methylpropanoate	[(E)-hex-3-enyl] 2-methylpropanoate 2-methylpropanoic acid [(E)-hex-3-enyl] ester 2-methylpropionic acid [(E)-hex-3-enyl] ester 84682-20-2 (E)-Hex-3-enyl isobutyrate EINECS 283-582-0	84682-20-2
CCC=CCCOC(=O)Cc1ccccc1	[(E)-hex-3-enyl] 2-phenylacetate hex-3-enyl 2-phenylacetate	[(E)-hex-3-enyl] 2-phenylacetate hex-3-enyl 2-phenylacetate 2-phenylacetic acid [(E)-hex-3-enyl] ester 2-phenylacetic acid hex-3-enyl ester [(E)-hex-3-enyl] 2-phenylethanoate hex-3-enyl 2-phenylethanoate (3E)-3-Hexenyl phenylacetate Acetic acid, phenyl-, 3-hexenyl ester
CCC=CCCOC(=O)CCCC	[(E)-hex-3-enyl] pentanoate	[(E)-hex-3-enyl] pentanoate pentanoic acid [(E)-hex-3-enyl] ester valeric acid [(E)-hex-3-enyl] ester 56922-81-7 35852-46-1 EINECS 252-761-5 Pentanoic acid, 3-hexenyl ester, (Z)- Valeric acid, 3-hexenyl ester, (Z)- Z-3-Hexenyl valerate cis-3-Hexenyl pentanoate (E)-3-Hexen-1-ol, pentanoate (Z)-3-Hexen-1-ol, pentanoate Neopentyl ethylphosphonofluoridoate cis-3-Hexenyl valerate (E)-Hex-3-enyl valera…	56922-81-7 35852-46-1
CCC(=O)OCCC=CCC	[(E)-hex-3-enyl] propanoate	[(E)-hex-3-enyl] propanoate propanoic acid [(E)-hex-3-enyl] ester propionic acid [(E)-hex-3-enyl] ester 53398-81-5 Propanoic acid, (E)-3-hexenyl ester (E)-Hex-3-enyl propionate EINECS 258-514-8 (Z)-3-Hexen-1-ol, propanoate (E)-3-Hexen-1-ol, propanoate	53398-81-5
CCC=CCCCCCOC(C)=O		[(E)-non-6-enyl] acetate acetic acid [(E)-non-6-enyl] ester [(E)-non-6-enyl] ethanoate 76238-22-7 (Z)-Non-6-enyl acetate AI3-34802 EINECS 278-397-7 cis-6-Nonen-1-yl acetate	76238-22-7
CC(C)C(OC(=O)c1ccccc1)C(C)(C)COC(=O)c1ccccc1	[1-(benzoyloxy)-2,2,4-trimethylpentan-3-yl] benzoate	[1-(benzoyloxy)-2,2,4-trimethylpentan-3-yl] benzoate [3-(benzoyloxy)-1-isopropyl-2,2-dimethyl-propyl] benzoate benzoic acid [1-isopropyl-2,2-dimethyl-3-(oxo-phenylmethoxy)propyl] ester benzoic acid [3-(benzoyloxy)-1-isopropyl-2,2-dimethyl-propyl] ester (2,2,4-trimethyl-1-phenylcarbonyloxy-pentan-3-yl) benzoate 68052-23-3 458058_ALDRICH 1,3-Pentanediol, 2,2,4-trimethyl-, dibenzoate 2,2,4-Trimethyl…	68052-23-3
OCC1COC(Cc2ccccc2)O1	[2-(phenylmethyl)-1,3-dioxolan-4-yl]methanol	[2-(phenylmethyl)-1,3-dioxolan-4-yl]methanol [2-(benzyl)-1,3-dioxolan-4-yl]methanol 5694-72-4 1,3-DIOXOLANE-4-METHANOL, 2-BENZYL- 1,3-Dioxolane, 2-benzyl-4-hydroxymethyl- 1,3-Dioxolane-4-methanol, 2-(phenylmethyl)- 2-Benzyl-1,3-dioxolan-4-ylmethanol 2-Benzyl-4-hydroxymethyl-1,3-dioxane 2-Benzyl-4-hydroxymethyl-1,3-dioxolane 2-Benzyl-4-methanol-1,3-dioxane 4-(Hydroxymethyl)-2-benzyl-1,3-dioxolane …	5694-72-4
CC(C)C(=O)OC(C(C)C)C(C)(C)COC(=O)C(C)C	[2,2,4-trimethyl-1-(2-methylpropanoyloxy)pentan-3-yl] 2-methylpropanoate	[2,2,4-trimethyl-1-(2-methylpropanoyloxy)pentan-3-yl] 2-methylpropanoate [1-isopropyl-2,2-dimethyl-3-(2-methylpropanoyloxy)propyl] 2-methylpropanoate 2-methylpropanoic acid [1-isopropyl-2,2-dimethyl-3-(2-methyl-1-oxopropoxy)propyl] ester 2-methylpropionic acid (3-isobutyryloxy-1-isopropyl-2,2-dimethyl-propyl) ester 53490-81-6 6846-50-0 NCGC00164194-01 1,3-Pentanediol, 2,2,4-trimethyl-, diisobutyr…	53490-81-6 6846-50-0
CC(C)(COC(=O)C(C)=C)COC(=O)C(C)=C	[2,2-dimethyl-3-(2-methylprop-2-enoyloxy)propyl] 2-methylprop-2-enoate	[2,2-dimethyl-3-(2-methylprop-2-enoyloxy)propyl] 2-methylprop-2-enoate 2-methylprop-2-enoic acid [2,2-dimethyl-3-(2-methyl-1-oxoprop-2-enoxy)propyl] ester 2-methylacrylic acid (3-methacryloyloxy-2,2-dimethyl-propyl) ester 104182-97-0 1985-51-9 2,2-Dimethyl-1,3-propanediyl bismethacrylate 2,2-Dimethylpropane dimethacrylate 2-Propenoic acid, 2-methyl-, 2,2-dimethyl-1,3-propanediyl ester CCRIS 7048 …	104182-97-0 1985-51-9
Cc1cccc(C)c1NC(=O)C[N+](Cc1ccccc1)(CC)CC	[2-[(2,6-dimethylphenyl)amino]-2-oxoethyl]-diethyl-(phenylmethyl)azanium	[2-[(2,6-dimethylphenyl)amino]-2-oxoethyl]-diethyl-(phenylmethyl)azanium [2-[(2,6-dimethylphenyl)amino]-2-oxo-ethyl]-diethyl-(phenylmethyl)ammonium [2-[(2,6-dimethylphenyl)amino]-2-oxoethyl]-diethyl-(phenylmethyl)ammonium benzyl-[2-[(2,6-dimethylphenyl)amino]-2-keto-ethyl]-diethyl-ammonium [2-[(2,6-dimethylphenyl)amino]-2-oxo-ethyl]-diethyl-(phenylmethyl)azanium BPBio1_001059 Prestwick3_000961 Pr…
CC(=O)Oc1ccc(cc1C1C(=O)Oc2ccc(cc21)C(C)(C)CC(C)(C)C)C(C)(C)CC(C)(C)C	[2-[2-oxo-5-(2,4,4-trimethylpentan-2-yl)-3H-1-benzofuran-3-yl]-4-(2,4,4-trimethylpentan-2-yl)phenyl] acetate	[2-[2-oxo-5-(2,4,4-trimethylpentan-2-yl)-3H-1-benzofuran-3-yl]-4-(2,4,4-trimethylpentan-2-yl)phenyl] acetate [2-[2-oxo-5-(1,1,3,3-tetramethylbutyl)-3H-benzofuran-3-yl]-4-(1,1,3,3-tetramethylbutyl)phenyl] acetate acetic acid [2-[2-oxo-5-(1,1,3,3-tetramethylbutyl)-3H-benzofuran-3-yl]-4-(1,1,3,3-tetramethylbutyl)phenyl] ester acetic acid [2-[2-keto-5-(1,1,3,3-tetramethylbutyl)-3H-benzofuran-3-yl]-4-…	216698-07-6
CC1(C)C(C1C=C(Cl)Cl)C(=O)OCc1cccc(c1)Oc1ccccc1	[3-(phenoxy)phenyl]methyl 3-(2,2-dichloroethenyl)-2,2-dimethylcyclopropane-1-carboxylate	[3-(phenoxy)phenyl]methyl 3-(2,2-dichloroethenyl)-2,2-dimethylcyclopropane-1-carboxylate [3-(phenoxy)phenyl]methyl 3-(2,2-dichlorovinyl)-2,2-dimethyl-cyclopropane-1-carboxylate 3-(2,2-dichlorovinyl)-2,2-dimethyl-1-cyclopropanecarboxylic acid [3-(phenoxy)phenyl]methyl ester 3-(2,2-dichlorovinyl)-2,2-dimethyl-cyclopropane-1-carboxylic acid [3-(phenoxy)benzyl] ester [3-(phenoxy)phenyl]methyl 3-(2,2-…	52341-32-9 52341-33-0
Cc1cc2c(cc1C)N=C1C(=NC(=O)NC1=O)N2CC(OC(C)=O)C(OC(C)=O)C(COC(C)=O)OC(C)=O		[3,4,5-triacetyloxy-1-(7,8-dimethyl-2,4-dioxobenzo[g]pteridin-10-yl)pentan-2-yl] acetate [2,3,4-triacetoxy-1-[(7,8-dimethyl-2,4-dioxo-benzo[g]pteridin-10-yl)methyl]butyl] acetate acetic acid [2,3,4-triacetoxy-1-[(7,8-dimethyl-2,4-dioxo-10-benzo[g]pteridinyl)methyl]butyl] ester acetic acid [2,3,4-triacetoxy-1-[(2,4-diketo-7,8-dimethyl-benzo[g]pteridin-10-yl)methyl]butyl] ester [3,4,5-triacetyloxy-…	752-13-6
[H]/N=C1\C=C(Br)C(=O)c2c\1c(O)c(cc2N)Nc1cc(ccc1)[N+](C)(C)C	[3-[(4,8-diamino-6-bromo-1,5-dioxonaphthalen-2-yl)amino]phenyl]-trimethylazanium	[3-[(4,8-diamino-6-bromo-1,5-dioxonaphthalen-2-yl)amino]phenyl]-trimethylazanium [3-[(4,8-diamino-6-bromo-1,5-dioxo-2-naphthyl)amino]phenyl]-trimethyl-ammonium [3-[(4,8-diamino-6-bromo-1,5-dioxo-2-naphthyl)amino]phenyl]-trimethylammonium [3-[(4,8-diamino-6-bromo-1,5-diketo-2-naphthyl)amino]phenyl]-trimethyl-ammonium [3-[(4,8-diamino-6-bromo-1,5-dioxo-naphthalen-2-yl)amino]phenyl]-trimethyl-azanium
CN(C)c1ccc(cc1)[C+](c1ccc(Nc2ccccc2)c2ccccc12)c1ccc(cc1)N(C)C	[4-[bis(4-dimethylaminophenyl)methylidene]naphthalen-1-ylidene]-phenylazanium	[4-[bis(4-dimethylaminophenyl)methylidene]naphthalen-1-ylidene]-phenylazanium [4-[bis(4-dimethylaminophenyl)methylene]-1-naphthylidene]-phenyl-ammonium [4-[bis(4-dimethylaminophenyl)methylene]-1-naphthylidene]-phenylammonium [4-[bis(4-dimethylaminophenyl)methylidene]naphthalen-1-ylidene]-phenyl-azanium ZINC03861454 ST5406458
Cc1cc(ccc1[C+](c1ccc(cc1C)N(Cc1cc(ccc1)S(O)(=O)=O)CC)c1ccc(cc1)N(CC)CC)N(Cc1cc(ccc1)S(O)(=O)=O)CC	[4-[bis[4-[ethyl-[(3-sulfophenyl)methyl]amino]-2-methylphenyl]methylidene]-1-cyclohexa-2,5-dienylidene]-diethylazanium	[4-[bis[4-[ethyl-[(3-sulfophenyl)methyl]amino]-2-methylphenyl]methylidene]-1-cyclohexa-2,5-dienylidene]-diethylazanium [4-[bis[4-[ethyl-[(3-sulfophenyl)methyl]amino]-2-methyl-phenyl]methylene]-1-cyclohexa-2,5-dienylidene]-diethyl-ammonium [4-[bis[4-[ethyl-[(3-sulfophenyl)methyl]amino]-2-methylphenyl]methylene]-1-cyclohexa-2,5-dienylidene]-diethylammonium [4-[bis[4-[ethyl-(3-sulfobenzyl)amino]-2-m…
CC(=O)OCCCNC(=O)C(OC(C)=O)C(C)(C)COC(C)=O	[4-acetyloxy-1-(3-acetyloxypropylamino)-3,3-dimethyl-1-oxobutan-2-yl] acetate	[4-acetyloxy-1-(3-acetyloxypropylamino)-3,3-dimethyl-1-oxobutan-2-yl] acetate [3-acetoxy-1-(3-acetoxypropylcarbamoyl)-2,2-dimethyl-propyl] acetate acetic acid [3-acetoxy-1-[(3-acetoxypropylamino)-oxomethyl]-2,2-dimethylpropyl] ester acetic acid [3-acetoxy-1-(3-acetoxypropylcarbamoyl)-2,2-dimethyl-propyl] ester [4-acetyloxy-1-(3-acetyloxypropylamino)-3,3-dimethyl-1-oxo-butan-2-yl] ethanoate
OC1C(COP(O)(O)=O)OC(C1O)N1C=CC(=O)NC1=O		[5-(2,4-dioxopyrimidin-1-yl)-3,4-dihydroxyoxolan-2-yl]methyl dihydrogen phosphate [5-(2,4-dioxopyrimidin-1-yl)-3,4-dihydroxy-tetrahydrofuran-2-yl]methyl dihydrogen phosphate [5-(2,4-dioxo-1-pyrimidinyl)-3,4-dihydroxy-2-tetrahydrofuranyl]methyl dihydrogen phosphate [5-(2,4-diketopyrimidin-1-yl)-3,4-dihydroxy-tetrahydrofuran-2-yl]methyl dihydrogen phosphate [5-(2,4-dioxopyrimidin-1-yl)-3,4-dihydrox…	58-97-9 28086-43-3
C=CCCCCCCCCC=O	undec-10-enal		112-45-8
C[Si](C)(C)O[Si](C)(C)C	trimethyl-trimethylsilyloxysilane		107-46-0 9006-65-9
C[N+](C)(C)CCOC(=O)C=C	trimethyl-(2-prop-2-enoyloxyethyl)azanium		20284-80-4 114122-07-5 139197-82-3
C[N+](C)(C)C	tetramethylazanium		14190-16-0 12545-87-8 28109-81-1 76913-76-3 12386-10-6
CCCC[N+](CCCC)(CCCC)CCCC	tetrabutylazanium		122544-96-1 70623-38-0 63314-37-4
CCC(=O)OCCC	Propyl propanoate
CCC(O)=O	Propanoic acid		68990-37-4 79-09-4 3349-08-4 68937-68-8 784139-72-6
CCCCCC=CCC=CCCCCCCCC(=O)OC(C)C	propan-2-yl (9E,12E)-octadeca-9,12-dienoate
CCCCCCCCC(=O)OCC=C	prop-2-enyl nonanoate		7493-72-3
CCCCCC(=O)OCC=C	prop-2-enyl hexanoate
CCC(C)COCC(=O)OCC=C	prop-2-enyl 2-(2-methylbutoxy)acetate		67634-01-9
CC=C	prop-1-ene		115-07-1 33004-01-2 676-63-1
C[Si](C)(C)O[Si](O[Si](C)(C)C)(O[Si](C)(C)C)c1ccccc1	phenyl-tris(trimethylsilyloxy)silane		2116-84-9 9076-37-3
C(c1ccccc1)c1ccccc1	phenylmethylbenzene		101-81-5
OCOCc1ccccc1	phenylmethoxymethanol		14548-60-8
Oc1ccccc1	PHENOL hydron; phenolate		1336-35-2 108-95-2 63496-48-0 73607-76-8 61788-41-8 14534-23-7 50356-25-7 8002-07-1 27073-41-2
O=C1CCCO1	oxolan-2-one		187997-16-6 96-48-0
CCCCCCC=C	oct-1-ene
CC(C)CC(CC(=O)NO)C(=O)NC(Cc1c[nH]c2ccccc12)C(=O)NC	N'-hydroxy-N-[3-(1H-indol-3-yl)-1-methylamino-1-oxopropan-2-yl]-2-(2-methylpropyl)butanediamide
CC(=O)N(CCN(C(C)=O)C(C)=O)C(C)=O	N-acetyl-N-[2-(diacetylamino)ethyl]acetamide		10543-57-4
CC(C)(CO)C(O)C(=O)NCCC(=O)NCCSSCCNC(=O)CCNC(=O)C(O)C(C)(C)CO	N-[3-[2-[2-[3-[(2,4-dihydroxy-3,3-dimethylbutanoyl)amino]propanoylamino]ethyldisulfanyl]ethylamino]-3-oxopropyl]-2,4-dihydroxy-3,3-dimethylbutanamide
CCCCCCCCCCCC[N+](C)(C)[O-]	N,N-dimethyldodecan-1-amine oxide		135526-66-8 160714-02-3 163221-07-6 1643-20-5 177162-47-9 73502-08-6
CN(=O)=O	N,N-dihydroxymethanamine Nitromethane		19527-13-0 75-52-5 104306-48-1
CCCCCCCCC=CCCCCCCCC(=O)NCCCN(C)C	N-(3-dimethylaminopropyl)octadec-9-enamide (E)-N-(3-dimethylaminopropyl)octadec-9-enamide		109-28-4
CCCCCCCCC=CCCCCCCCC(=O)NCCO	N-(2-hydroxyethyl)octadec-9-enamide (E)-N-(2-hydroxyethyl)octadec-9-enamide
CCC(=O)OC	Methyl propanoate		554-12-1
CCCCCC(=O)OC	Methyl hexanoate		106-70-7
COC(C)=O	METHYL ACETATE		79-20-9
COC(=O)Cc1ccccc1	Methyl 2-phenylacetate
COC(=O)C(N)Cc1ccc(O)cc1	methyl 2-amino-3-(4-hydroxyphenyl)propanoate
COC	Methoxymethane		115-10-6 157621-61-9
COc1ccccc1	Methoxybenzene		100-66-3
IC(I)I	Iodoform		75-47-8
CCCCCC[Si](OC)(OC)OC	hexyl-trimethoxysilane		145054-84-8 3069-19-0
CC=CC=CCOC(C)=O	Hexa-2,4-dienyl acetate [(2E,4E)-hexa-2,4-dienyl] acetate		1516-17-2
CC(=O)CCC=C	hex-5-en-2-one		109-49-9
SCc1ccco1	furan-2-ylmethanethiol		98-02-2
CCCCCCCCC(=O)NCCC[N+](C)(C)CC	ethyl-dimethyl-[3-(nonanoylamino)propyl]azanium
CCCCC(=O)OCC	Ethyl pentanoate		539-82-2
CCOC(=O)CC(C)C	Ethyl 3-methylbutanoate		108-64-5 117442-70-3
CCOC(=O)C(=C)O	ethyl 2-hydroxyprop-2-enoate
CCCOC(=O)CCCCC(=O)OCCC	DIPROPYL HEXANEDIOATE		106-19-4
C[Si](C)=O	dimethyl-oxosilane
C[N+](C)(CC=C)CC=C	dimethyl-di(prop-2-enyl)azanium
C[Si](C)(O[Si](C)(C)C)O[Si](C)(C)C	dimethyl-bis(trimethylsilyloxy)silane		107-51-7
C[N+](C)(CC(=O)OCCCCCCCCCCCCCC)CCCNC(=O)CCCCCCCC=CCC=CCCCCC	dimethyl-[3-[[(9E,12E)-octadeca-9,12-dienoyl]amino]propyl]-(2-oxo-2-tetradecoxyethyl)azanium
COC(=O)CC(=O)OC	Dimethyl propanedioate		108-59-8
COC(=O)CCCC(=O)OC	Dimethyl pentanedioate		111366-62-2 1119-40-0
COC(=O)CCCCC(=O)OC	Dimethyl hexanedioate
ClCCl	Dichloromethane		1605-72-7 75-09-2
CCC(=O)OCCCCCCCCC=C	dec-9-enyl propanoate		68480-06-8
C=CCCCCCCCCO	dec-9-en-1-ol		80449-44-1 13019-22-2
CCCCOC(=O)CC(C)C	Butyl 3-methylbutanoate		109-19-3
CCCCOC(=O)Cc1ccccc1	butyl 2-phenylacetate		122-43-0
CCCCOC(=O)C(C)C	Butyl 2-methylpropanoate		97-87-0
CCC(C)OC(C)=O	butan-2-yl acetate		116698-48-7 105-46-4
CC(C)COC(=O)CCC(=O)OCC(C)C	bis(2-methylpropyl) butanedioate
CC=O	acetaldehyde		75-07-0
Cc1cccc2CCCC(=O)c21	8-methyl-3,4-dihydro-2H-naphthalen-1-one		51015-28-2
CCOCCC(C)CCC=C(C)C	8-Ethoxy-2,6-dimethyloct-2-ene		69929-16-4
CC(=O)OC(C)CCCC(C)=C	6-methylhept-6-en-2-yl acetate
CC(C)=CCCC(C)=O	6-Methylhept-5-en-2-one		110-93-0 409-02-9 129085-68-3 132958-67-9
OC(=O)C1CCC(=O)N1	5-oxopyrrolidine-2-carboxylic acid		4042-36-8 149-87-1 98-79-3
Oc1cc(Cl)ccc1Oc1ccc(Cl)cc1	5-chloro-2-(4-chlorophenoxy)phenol
Oc1cc(Cl)ccc1Oc1ccc(Cl)cc1Cl	5-CHLORO-2-(2,4-DICHLOROPHENOXY)PHENOL		3380-34-5 112099-35-1 88032-08-0
CC(N)C(=O)NC(CCC(N)=O)C(O)=O	5-amino-2-(2-aminopropanoylamino)-5-oxopentanoic acid
CC1(C)NC(=O)NC1=O	5,5-dimethylimidazolidine-2,4-dione		25154-41-0 77-71-4
CC(=O)CCc1ccccc1	4-Phenylbutan-2-one		2550-26-7
CNC(CC(O)=O)C(=O)OC	4-methoxy-3-methylamino-4-oxobutanoic acid
CCc1ccc(O)cc1	4-Ethylphenol		29471-88-3 123-07-9 24979-70-2 101052-19-1
Oc1ccc(Cl)cc1	4-Chlorophenol
NCCCC(O)=O	4-Aminobutanoic acid 4-azaniumylbutanoate		28805-76-7 70582-09-1 56-12-2 3131-86-0
O=CC12CC=CCC1C1CC=CCC1O2	4,5a,6,9,9a,9b-hexahydro-1H-dibenzofuran-4a-carbaldehyde
CC1(C)COCN1	4,4-Dimethyl-1,3-oxazolidine		51200-87-4
CC(=O)CCc1ccc(cc1)OC	4-(4-Methoxyphenyl)butan-2-one		104-20-1
CC(=O)CCc1cc(OC)c(O)cc1	4-(4-Hydroxy-3-methoxyphenyl)butan-2-one		122-48-5
CN1C=CN(C)C1=[N+]=Nc1ccc(N)cc1	4-(1,3-dimethylimidazol-1-ium-2-yl)diazenylaniline
C=CC(=O)OCCC(O)=O	3-prop-2-enoyloxypropanoic acid		121938-31-6 24615-84-7
CCCCCCCCC=CC(=O)NC(Cc1ccccc1)C(O)=O	3-phenyl-2-[[(E)-undec-2-enoyl]amino]propanoic acid
C=C1CCOC1=O	3-methylideneoxolan-2-one
CCCCCCC(=O)OCCC(C)C	3-Methylbutyl heptanoate		109-25-1
CC(C)CCOC(C)=O	3-Methylbutyl acetate		123-92-2 29732-50-1
CC(=C)CCOC(=O)CC(C)C	3-methylbut-3-enyl 3-methylbutanoate		54410-94-5
CC(C)=CC(=O)OCCC(C)=C	3-methylbut-3-enyl 3-methylbut-2-enoate		72928-35-9
COC(C)(C)CCO	3-Methoxy-3-methylbutan-1-ol		56539-66-3 77908-12-4
CCCC=C1OC(=O)c2ccccc21	3-butylidene-2-benzofuran-1-one (3Z)-3-butylidene-2-benzofuran-1-one
CCCCCCCCCCCC(=O)NCCN(CCC(O)=O)CCO	3-[2-(dodecanoylamino)ethyl-(2-hydroxyethyl)amino]propanoic acid
CC(C)CCCC(C)CC=O	3,7-Dimethyloctanal		5988-91-0 81738-03-6 25795-46-4
CC(=O)OCCC(C)CCCC(C)=C	3,7-dimethyloct-7-enyl acetate		130980-16-4 141-11-7 20777-37-1 94481-73-9
CC(=C)CCCC(C)CCOC(=O)C(C)C	3,7-dimethyloct-7-enyl 2-methylpropanoate		138-23-8
CC(C)CCCC(C)(O)C=C	3,7-Dimethyloct-1-en-3-ol		18479-49-7
Oc1c(cc(Br)cc1Br)C(=O)Nc1cc(ccc1)C(F)(F)F	3,5-dibromo-2-hydroxy-N-[3-(trifluoromethyl)phenyl]benzamide		4776-06-1
CCCCCCCCCCCC(=O)NCCC[N+](C)(C)[O-]	3-(dodecanoylamino)-N,N-dimethylpropan-1-amine oxide		228113-46-0 61792-31-2
C[N+](C)(C)C(CC1=CNC(=S)N1)C([O-])=O	3-(2-sulfanylidene-1,3-dihydroimidazol-4-yl)-2-trimethylazaniumylpropanoate		497-30-3
O=COCCc1ccccc1	2-Phenylethyl formate		104-62-1
CC(C)C(=O)OCCc1ccccc1	2-Phenylethyl 2-methylpropanoate		103-48-0
OCCc1ccccc1	2-PHENYLETHANOL		60-12-8 1321-27-3
CCCCCCCCN1SC=CC1=O	2-octyl-1,2-thiazol-3-one
CCCC(=O)OCC(C)C	2-Methylpropyl butanoate		539-90-2
CC(C)C=O	2-Methylpropanal		26140-46-5 78-84-2
CC(CCC)COC(=O)C(C)CCC	2-Methylpentyl 2-methylpentanoate		90397-38-9
CC(C)CC(=O)OCC(C)CC	2-Methylbutyl 3-methylbutanoate		2445-77-4
CCC(C)(C)S	2-Methylbutane-2-thiol		1679-09-0
CC(C)(O)C=C	2-Methylbut-3-en-2-ol		115-18-4
COC(C)(C)C	2-Methoxy-2-methylpropane		1634-04-4
CC(O)C(=O)NCCO	2-Hydroxy-N-(2-hydroxyethyl)propanamide
C[N+](CCO)(CCNC(=O)CCCCCCCC=CCCCCCCCC)CCNC(=O)CCCCCCCC=CCCCCCCCC	2-hydroxyethyl-methyl-bis[2-[[(E)-octadec-9-enoyl]amino]ethyl]azanium
CC(=C)C(=O)OCCO	2-hydroxyethyl 2-methylprop-2-enoate
OC(=O)C(O)(c1ccccc1)c1ccccc1	2-hydroxy-2,2-di(phenyl)acetic acid		76-93-7
OC(C(=O)c1ccccc1)c1ccccc1	2-hydroxy-1,2-di(phenyl)ethanone		9000-05-9 9000-73-1 579-44-2 91845-21-5 119-53-9 8050-35-9
CCCCCCC1=CCCC1=O	2-Hexylcyclopent-2-en-1-one		95-41-0
CCOc1cc2ccccc2cc1	2-Ethoxynaphthalene		93-18-5
CN(C)C(C)(C)CO	2-dimethylamino-2-methylpropan-1-ol
NCCS	2-Aminoethanethiol		139720-70-0 60-23-1 3037-04-5 93965-19-6
CCOC(=O)CCC(N)C(O)=O	2-amino-5-ethoxy-5-oxopentanoic acid
[H]/N=C(\N)/NCCCC(N)C(O)=O	2-amino-5-(diaminomethylideneamino)pentanoic acid 2-amino-5-(diaminomethylideneazaniumyl)pentanoate		7004-12-8 74-79-3
Nc1cc(cc(c1O)N(=O)=O)N(=O)=O	2-Amino-4,6-dinitrophenol		96-91-3
CC(CC)C(N)C(O)=O	2-Amino-3-methylpentanoic acid		205879-85-2 198412-80-5 19883-67-1 7004-09-3 224311-99-3 1509-34-8 319-78-8
CC(C)(N)CO	2-Amino-2-methylpropan-1-ol		189832-99-3 124-68-5
CCCCCCCCNCCN(CC(O)=O)CCNCCCCCCCC	2-[bis[2-(octylamino)ethyl]amino]acetic acid		17670-95-0
CCCCCCCCc1ccccc1OCCOCCOCCOCCOCCOCCOCCOCCOCC(O)=O	2-[2-[2-[2-[2-[2-[2-[2-[2-(2-octylphenoxy)ethoxy]ethoxy]ethoxy]ethoxy]ethoxy]ethoxy]ethoxy]ethoxy]acetic acid		25338-58-3
CCCCCCCCCCOCCOCCOCCOCCOCCOCCO	2-[2-[2-[2-[2-(2-decoxyethoxy)ethoxy]ethoxy]ethoxy]ethoxy]ethanol		5168-89-8
CC(CN(CC(C)OCCO)CCN(CC(C)OCCO)CC(C)OCCO)OCCO	2-[1-[2-[bis[2-(2-hydroxyethoxy)propyl]amino]ethyl-[2-(2-hydroxyethoxy)propyl]amino]propan-2-yloxy]ethanol
COCC(C)OCC(C)OC(C)CO	2-[1-(1-methoxypropan-2-yloxy)propan-2-yloxy]propan-1-ol		11099-65-3 12002-24-3 1338-53-0 25498-49-1 29699-26-1 30373-82-1
CC(C)=CCC(=O)CC(C)C	2,7-Dimethyloct-6-en-4-one		66471-49-6
CC(C)(CO)C(O)C(=O)NCCC(=O)NCCSS(O)(=O)=O	2,4-dihydroxy-3,3-dimethyl-1-oxo-1-[[3-oxo-3-(2-sulfosulfanylethylamino)propyl]amino]butane
CCCCCC=CCC=CCCCCCCCC(=O)OC(COC(=O)CCCCCCCC=CCC=CCCCCC)COC(=O)CCCCCCCC=CCC=CCCCCC	2,3-bis[[(9E,12E)-octadeca-9,12-dienoyl]oxy]propyl (9E,12E)-octadeca-9,12-dienoate 2,3-di(octadeca-9,12-dienoyloxy)propyl octadeca-9,12-dienoate
CC(F)(F)C(C)(F)F	2,2,3,3-tetrafluorobutane
OCCOc1ccccc1	2-(phenoxy)ethanol		122-99-6 37220-49-8 134367-25-2 18249-17-7 200260-63-5 79586-53-1 9004-78-8 56257-90-0
Oc1ccccc1N(=O)=O	2-(dihydroxyamino)phenol 2-Nitrophenol
[H]/N=C(\N)/N(C)CC(O)=O	2-(carbamimidoyl-methylamino)acetic acid 2-(diaminomethylidene-methylazaniumyl)acetate		57-00-1
O=CCc1cccc2CCCCc12	2-(5,6,7,8-tetrahydronaphthalen-1-yl)acetaldehyde
CC(C)COc1cc2ccccc2cc1	2-(2-Methylpropoxy)naphthalene		2173-57-1
OCCSCCO	2-(2-hydroxyethylsulfanyl)ethanol
CCCOC(C)OCCc1ccccc1	2-(1-propoxyethoxy)ethylbenzene		7493-57-4
CCCC(O)Cc1ccccc1	1-phenylpentan-2-ol		116724-04-0 705-73-7
C=CCCC(=O)c1ccccc1	1-phenylpent-4-en-1-one		3240-29-7
CCCC(=O)c1ccccc1	1-phenylbutan-1-one		495-40-9
CC(=O)c1cc2ccccc2cc1	1-naphthalen-2-ylethanone		93-08-3 1333-52-4
COCC(C)OC(C)=O	1-methoxypropan-2-yl acetate
CCOC(C)Oc1ccccc1	1-ethoxyethoxybenzene
CCOCCOCCOCC	1-ETHOXY-2-(2-ETHOXYETHOXY)ETHANE
CC(O)CN	1-Aminopropan-2-ol		78-96-6 1674-56-2 2799-17-9
CC(C)Nc1ccc(N)c2c1C(=O)c1ccccc1C2=O	1-amino-4-(propan-2-ylamino)anthracene-9,10-dione		62649-65-4
CC1=CN(C2CC(O)C(CO)O2)C(=O)NC1=O	1-[4-hydroxy-5-(hydroxymethyl)oxolan-2-yl]-5-methylpyrimidine-2,4-dione
COc1ccc(cc1)OC	1,4-Dimethoxybenzene		150-78-7
CN1CCN(C)C1=O	1,3-Dimethylimidazolidin-2-one		80-73-9
OCNC(=O)NCO	1,3-Bis(hydroxymethyl)urea		140-95-4
CC(=O)OC(CC(=O)OCC)(CC(=O)OCC)C(=O)OCC	1,2,3-triethyl 2-acetyloxypropane-1,2,3-tricarboxylate		77-89-4
CC(C(OC)OC)c1ccccc1	1,1-dimethoxypropan-2-ylbenzene
CC1(C)CC(C)(c2ccccc12)c1ccccc1	1,1,3-trimethyl-3-phenyl-2H-indene
FC(F)(F)C1(F)C(F)(F)C(F)(F)C(F)(F)C(F)(F)C1(F)F	1,1,2,2,3,3,4,4,5,5,6-undecafluoro-6-(trifluoromethyl)cyclohexane		355-02-2
FC1(F)C2(F)C(F)(C(F)(F)C(F)(F)C1(F)F)C(F)(F)C(F)(F)C(F)(F)C2(F)F	1,1,2,2,3,3,4,4,4a,5,5,6,6,7,7,8,8,8a-octadecafluoronaphthalene		60433-11-6 60433-12-7 127964-38-9 306-94-5 70323-33-0 77115-10-7
CC(C)COCC(C)O	1-(2-methylpropoxy)propan-2-ol		23436-19-3
OCCN1CCNC1=O	1-(2-Hydroxyethyl)imidazolidin-2-one		3699-54-5
NCCNc1cccc2C(=O)c3ccccc3C(=O)c21	1-(2-aminoethylamino)anthracene-9,10-dione
CC(=O)c1ccc(CC)cc1CC	1-(2,4-diethylphenyl)ethanone		52191-01-2
CCCOCC(C)OCC(C)O	1-(1-propoxypropan-2-yloxy)propan-2-ol		29911-27-1
CCOC(C)OCCCCCC	1-(1-Ethoxyethoxy)hexane		54484-73-0
COC1CCc2ccccc21			1006-27-5 67952-67-4
C(C1OCCO1)c1ccccc1			101-49-5
Cc1ccc(cc1)OC(=O)Cc1ccccc1			101-94-0
CCO[Si](CCC(F)(F)C(F)(F)C(F)(F)C(F)(F)C(F)(F)C(F)(F)C(F)(F)C(F)(F)F)(OCC)OCC			101947-16-4
CC(C)=CCCC(C)=CCOC(=O)Cc1ccccc1			102-22-7 71648-43-6
CCCC(=O)OCc1ccccc1			103-37-7
COC(C)COC(C)CO			104512-57-4 112388-78-0 12002-35-6 197632-43-2 34590-94-8 83730-60-3 13588-28-8
O=C1c2ccccc2Nc2cc3c(cc12)Nc1ccccc1C3=O			1047-16-1 39362-27-1 42612-56-6 63440-25-5 65381-35-3 67051-64-3 67053-84-3 87397-48-6
C[Si]1(C)O[Si](C)(C)O[Si](C)(C)O[Si](C)(C)O1			104986-37-0 556-67-2 83874-62-8
C[Si]1(C)O[Si](C)(C)O[Si](C)(C)O[Si](C)(C)O[Si](C)(C)O[Si](C)(C)O[Si](C)(C)O1			107-50-6
C1COCCN1			110-91-8 147366-31-2 61791-40-0 88542-81-8 96122-95-1 99108-56-2
CCOCCOCCO			111-90-0
CCCCOCCOC(C)=O			112-07-2
Cc1cc(ccc1)OC(=O)Cc1ccccc1			122-27-0
NCC(O)CO			13552-31-3 98923-21-8 616-30-8
CC(CCCC(C)(C)O)CC(OC)OC			141-92-4
CCCCOC(=O)C(C)CC			144831-53-8 15706-73-7
FC(F)(F)C(F)(F)C(F)(F)C(F)(F)C(F)(F)C(F)(F)F			154452-93-4 355-42-0 82785-18-0
FC(F)(F)C(F)(F)C(F)(F)C(F)(F)C(F)(F)C(F)(F)C(F)(F)F			156930-32-4 335-57-9
CC=CC(C)C(=O)OCC			1617-23-8
Nc1ccc2c3c1cccc3C(=O)NC2=O			1742-95-6
O=C1C=CC(=O)O1			184288-31-1 108-31-6 224641-13-8 224641-15-0 224641-16-1 24937-72-2
CCCC(=O)OCC=C			2051-78-7
CC(=O)CCC(=O)OCCCC			2052-15-5
O=CCOc1ccccc1			2120-70-9
COC(=O)CCC(C)C			2412-80-8
CCCCCC=CCC=CCCCCCCCC(=O)OC(CO)COC(=O)CCCCCCCC=CCC=CCCCCC			2442-62-8
C1N2CN3CN1CN(C2)C3			24911-88-4 100-97-0 11103-67-6 15978-33-3 56549-34-9 74734-16-0 91773-48-7
COC1CCCCCN=1			2525-16-8
CCCCOCOCCCC			2568-90-3
COC(=O)c1ccc(cc1)C(C)(C)C			26537-19-9
CCCCCCCC[Si](OC)(OC)OC			3069-40-7
CCC(C)(CCC=C(C)C)CC=O			34687-43-9
CCOC(=O)CCCCCCCCC=C			36118-46-4 62453-48-9 692-86-4
CCCOC(=O)Cc1ccccc1			4606-15-9
CC1(C)C(C1C=C(Br)Br)C(=O)OC(C#N)c1cccc(c1)Oc1ccccc1			52820-00-5 59112-88-8 120710-25-0 120710-23-8 120710-24-9
CC(=CC)C(=O)OCC			5837-78-5 55514-48-2
COC(C)(C)CCCC(C)C=O			62439-41-2
CC(=C)C=C			68441-58-7 78006-92-5 78-79-5
NC(CCC(=O)NC(CS)C(=O)NCC(O)=O)C(O)=O			70-18-8
NCCCC(N)C(O)=O			70-26-8 7006-33-9 348-66-3 616-07-9
CC(C)=CCCC(C)(C=C)OC(=O)Cc1ccccc1			7143-69-3
NCCCCCCN			73398-58-0 124-09-4
CC(C)C(O)=O			79-31-2
FCC(F)(F)F			811-97-2 29759-38-4
OC(=O)Cc1c[nH]c2ccccc21			87-51-4 54692-39-6 6305-45-9
Oc1cccc2ccccc21			90-15-3 50356-21-3
Cc1cc2CCCNc2cc1			91-61-2
CC(C)CC(O)=O			92634-50-9 35915-22-1 503-74-2
CC1CC=C(CC=1)C(C)C			99-85-4
CCCCC(=O)OCC(COCC(CO)(CO)CO)(CO)CO	[3-hydroxy-2-[[3-hydroxy-2,2-bis(hydroxymethyl)propoxy]methyl]-2-(hydroxymethyl)propyl] pentanoate		67762-52-1
CC(=O)OCC(COC(C)=O)(COC(C)=O)COC(C)=O	[3-acetyloxy-2,2-bis(acetyloxymethyl)propyl] acetate
COC(=O)OCCC=CCC	[(E)-hex-3-enyl] methyl carbonate hex-3-enyl methyl carbonate		67633-96-9
CCC=CCCOC(=O)C(C)O	[(E)-hex-3-enyl] 2-hydroxypropanoate hex-3-enyl 2-hydroxypropanoate
CCC=CCC(=O)OCCC=CCC	[(E)-hex-3-enyl] (E)-hex-3-enoate hex-3-enyl hex-3-enoate
COc1ccccc1NN=C1C(=O)C=Cc2ccc(cc21)[N+](C)(C)C	[(8Z)-8-[(2-methoxyphenyl)hydrazinylidene]-7-oxonaphthalen-2-yl]-trimethylazanium
CC(C)=CCCC(C)=CCOC(=O)C(C)=CC	[(2E)-3,7-dimethylocta-2,6-dienyl] (E)-2-methylbut-2-enoate 3,7-dimethylocta-2,6-dienyl 2-methylbut-2-enoate		93981-55-6 7785-33-3 61827-81-4
CC(C)=CCC(COC(C)=O)C(C)C	(5-methyl-2-propan-2-ylhex-4-enyl) acetate
COC(=O)CCC[N+](C)(C)C	(4-methoxy-4-oxobutyl)-trimethylazanium
COc1cc(CC=C)ccc1OC(=O)Cc1ccccc1	(2-methoxy-4-prop-2-enylphenyl) 2-phenylacetate
CC(=O)OCC(CO)OC(C)=O	(1-acetyloxy-3-hydroxypropan-2-yl) acetate		101364-64-1 102-62-5 1300-63-6 25395-31-7 29860-16-0
CC(=O)OCC(OC(C)=O)C(OC(C)=O)C(OC(C)=O)C(C=O)OC(C)=O	(1,2,4,5-tetraacetyloxy-6-oxohexan-3-yl) acetate
CCCCOCC(C)OCC(C)O	1-(1-butoxypropan-2-yloxy)propan-2-ol	1-(1-butoxypropan-2-yloxy)propan-2-ol 1-(2-butoxy-1-methyl-ethoxy)propan-2-ol 1-(2-Butoxy-1-methylethoxy)propan-2-ol 29911-28-2 102646-52-6 12612-71-4 158884-53-8 220522-64-5 30941-36-7 36563-43-6 37335-69-6 39364-14-2 39364-15-3 57904-07-1 59029-72-0 71714-72-2 83931-37-7 9003-13-8 9007-07-2 9009-42-1 1-(2-BUTOXY-1-METHYLETHOXY)-2-PROPANOL 2-Propanol, 1-(2-butoxy-1-methylethoxy)- 4-01-00-02474 (…	29911-28-2 102646-52-6 12612-71-4 158884-53-8 220522-64-5 30941-36-7 36563-43-6 37335-69-6 39364-14-2 39364-15-3 57904-07-1 59029-72-0 71714-72-2 83931-37-7 9003-13-8 9007-07-2 9009-42-1
C(C([n]1ccc2ccccc12)[n]1ccc2ccccc12)c1ccccc1		1-(1-indol-1-yl-2-phenylethyl)indole 1-(1-indol-1-yl-2-phenyl-ethyl)indole 1-[1-(1-indolyl)-2-phenylethyl]indole 67801-37-0 1,1'-(2-Phenylethylidene)bis(1H-indole) 1H-Indole, 1,1'-(2-phenylethylidene)bis- 2-Phenyl-1,1-bis(1H-indol-1-yl)ethane EINECS 267-157-7	67801-37-0
CC(C)=CCCC(C)CC([n]1ccc2ccccc12)[n]1ccc2ccccc12		1-(1-indol-1-yl-3,7-dimethyloct-6-enyl)indole 1-(1-indol-1-yl-3,7-dimethyl-oct-6-enyl)indole 1-[1-(1-indolyl)-3,7-dimethyloct-6-enyl]indole 67801-16-5 1,1'-(3,7-Dimethyloct-6-enylidene)bis(1H-indole) 1H-Indole, 1,1'-(3,7-dimethyl-6-octenylidene)bis- 8,8-Bis(1H-indol-1-yl)-2,6-dimethyl-2-octene EINECS 267-136-2	67801-16-5
COCC(C)OCC(C)O		1-(1-methoxypropan-2-yloxy)propan-2-ol 1-(2-methoxy-1-methyl-ethoxy)propan-2-ol 1-(2-Methoxy-1-methylethoxy)propan-2-ol 37286-64-9 54004-82-9 20324-32-7 133597-45-2 2-Propanol, 1-(2-methoxy-1-methylethoxy)- EINECS 243-733-3 1-(2-METHOXY-1-METHYLETHOXY)-2-PROPANOL Adeka Carpal ML 250 Dowfroth 250 HSDB 5160 Jeffox OL 2700 PPG-3 Methyl ether Poly(oxy(methyl-1,2-ethanediyl)), alpha-methyl-omega-hydro…	37286-64-9 54004-82-9 20324-32-7 133597-45-2
CC(OCCC)OCCC		1-(1-propoxyethoxy)propane 105-82-8 Propane, 1,1'-[ethylidenebis(oxy)]bis- 1,1'-(Ethylidenebis(oxy))bispropane 1,1-Dipropoxyethane 4-01-00-03105 (Beilstein Handbook Reference) Acetaldehyde dipropyl acetal Acetaldehyde, dipropyl acetal Acetaldehyde-di-n-propyl acetal BRN 1697928 Dipropyl acetal EINECS 203-335-2 Propane, 1,1'-(ethylidenebis(oxy))bis- n-Propyl acetal	105-82-8
CCCCCCOCC(OC)OC	1-(2,2-Dimethoxyethoxy)hexane	1-(2,2-Dimethoxyethoxy)hexane 17597-95-4 2-Hexoxyacetaldehyde dimethylacetal AI3-28733 Acetaldehyde, (hexyloxy)-, dimethyl acetal EINECS 241-563-4 Hexane, 1-(2,2-dimethoxyethoxy)- Hexoxy dimethyl acetal Hexoxyacetaldehyde dimethyl acetal Hexoxyacetaldehyde dimethylacetal 2-Hexoxyacetaldehyde dimethyl acetal	17597-95-4
Cc1ccc(CC(OC)OC)cc1	1-(2,2-Dimethoxyethyl)-4-methylbenzene	1-(2,2-Dimethoxyethyl)-4-methylbenzene 1-(2,2-dimethoxyethyl)-4-methyl-benzene 42866-91-1 Benzene, 1-(2,2-dimethoxyethyl)-4-methyl- EINECS 255-976-2 p-(2,2-Dimethoxyethyl)toluene	42866-91-1
CCOC(C)COCC(C)O	1-(2-Ethoxypropoxy)propan-2-ol	1-(2-Ethoxypropoxy)propan-2-ol 10143-32-5 1-(2-Ethoxypropoxy)-2-propanol EINECS 233-408-4 2-Propanol, 1-(2-ethoxypropoxy)-	10143-32-5
CC(C)C(O)C(C)(C)COCCO	1-(2-Hydroxyethoxy)-2,2,4-trimethylpentan-3-ol	1-(2-Hydroxyethoxy)-2,2,4-trimethylpentan-3-ol 1-(2-hydroxyethoxy)-2,2,4-trimethyl-pentan-3-ol 68959-25-1 3-Pentanol, 1-(2-hydroxyethoxy)-2,2,4-trimethyl- EINECS 273-409-7
OCCNc1ccc(NCCCO)c2c1C(=O)c1ccccc1C2=O	1-(2-hydroxyethylamino)-4-(3-hydroxypropylamino)anthracene-9,10-dione	1-(2-hydroxyethylamino)-4-(3-hydroxypropylamino)anthracene-9,10-dione 1-(2-hydroxyethylamino)-4-(3-hydroxypropylamino)-9,10-anthraquinone 67674-26-4 1-((2-Hydroxyethyl)amino)-4-((3-hydroxypropyl)amino)anthraquinone 1-(2-Hydroxyethylamino)-4-(3-hydroxypropylamino)-9,10-anthracenedione 9,10-Anthracenedione, 1-((2-hydroxyethyl)amino)-4-((3-hydroxypropyl)amino)- EINECS 266-865-3	67674-26-4
COC(C)COCC(C)O	1-(2-Methoxypropoxy)propan-2-ol	1-(2-Methoxypropoxy)propan-2-ol 1321-21-7 13429-07-7 1-(2-METHOXYPROPOXY)-2-PROPANOL 2-Propanol, 1-(2-methoxypropoxy)- AI3-15574 EINECS 236-547-9 Polyoxypropylene (2) methyl ether Polypropylene glycol (2) methyl ether	1321-21-7 13429-07-7
ClC=CC[N+]12CN3CN(C1)CN(C2)C3		1-(3-Chloro-2-propenyl)-1lambda~5~,3,5,7-tetraazatricyclo[3.3.1.1~3,7~]decane 3,5,7-Triaza-1-azoniatricyclo[3.3.1.13,7]decane, 1-(3-chloro-2-propenyl)- 4080-31-3 (CHLORIDE SALT) AIDS-156135 AIDS156135 Dowicil {100[1-(3-chloroallyl)-3,5,7-triazo-1-azoniaadamantane} chloride] NSC172971 (CHLORIDE SALT) Quaternium-15 (*chloride salt*) {3,5,7-Triaza-1-azoniatricyclo[3.3.1.13,7]decane,} 1-(3-chloro-2-p…
COCCCOC(CC)OC(C)=O	1-(3-methoxypropoxy)propyl acetate	1-(3-methoxypropoxy)propyl acetate acetic acid 1-(3-methoxypropoxy)propyl ester 1-(3-methoxypropoxy)propyl ethanoate 88917-22-0 Propanol, (2-methoxymethylethoxy)-, acetate Propanol, 1(or 2)-(2-methoxymethylethoxy)-, acetate
CCC(=O)c1ccc(cc1)OC	1-(4-methoxyphenyl)propan-1-one	1-(4-methoxyphenyl)propan-1-one 121-97-1 p-Methoxypropiophenone 4&#8242;-Methoxypropiophenone ST5406149 InChI=1/C10H12O2/c1-3-10(11)8-4-6-9(12-2)7-5-8/h4-7H,3H2,1-2H M24809_ALDRICH ZINC00330146 AI3-04094 EINECS 204-512-7 NSC 11834 Propiophenone, 4'-methoxy- (8CI) AB-131/40236160 ghl.PD_Mitscher_leg0.581 1-Propanone, 1-(4-methoxyphenyl)- 4'-Methoxypropiophenone Ethyl 4-methoxyphenyl ketone NSC1183…	121-97-1
CC(=O)Cc1ccc(cc1)OC		1-(4-methoxyphenyl)propan-2-one 1-(4-methoxyphenyl)acetone 122-84-9 199176_ALDRICH ST5406450 Anisolacetone 1-(4-Methoxyphenyl)-2-propanone InChI=1/C10H12O2/c1-8(11)7-9-3-5-10(12-2)6-4-9/h3-6H,7H2,1-2H 64861_FLUKA W267406_ALDRICH Anisketone 1-(p-Anisyl)-2-propanone ghl.PD_Mitscher_leg0.658 1-(p-Methoxyphenyl)-2-propanone (natural) ZINC01848437 NSC46101 2-Propanone, (p-methoxyphenyl)- 4'-Methoxyphe…
CC(=O)c1c(C)c(c(c(c1C)N(=O)=O)C(C)(C)C)N(=O)=O		1-(4-tert-butyl-2,6-dimethyl-3,5-dinitrophenyl)ethanone 1-(4-tert-butyl-2,6-dimethyl-3,5-dinitro-phenyl)ethanone 81-14-1 4'-tert-Butyl-2',6'-dimethyl-3',5'-dinitroacetophenone Acetophenone, 4'-tert-butyl-2',6'-dimethyl-3',5'-dinitro- Ethanone, 1-[4-(1,1-dimethylethyl)-2,6-dimethyl-3,5-dinitrophenyl]- Musk ketone NSC15339 4-tert-Butyl-2,6-dimethyl-3,5-dinitroacetophenone 60720_FLUKA Ketone Moschus…	81-14-1
CC(=O)c1ccc(cc1)C(C)(C)C		1-(4-tert-butylphenyl)ethanone 43133-94-4 943-27-1 ST5405263 357642_ALDRICH 4&#8242;-tert-Butylacetophenone 1-((1,1-Dimethylethyl)phenyl)ethanone Ethanone, 1-((1,1-dimethylethyl)phenyl)- 4'-tert-Butylacetophenone 4-tert-Butylacetophenone Acetophenone, 4'-tert-butyl- Ethanone, 1-[4-(1,1-dimethylethyl)phenyl]- NSC826 p-tert-Butylacetophenone 1-(4-(1,1-DIMETHYLETHYL)PHENYL)ETHANONE Acetophenone, 4'-…	43133-94-4 943-27-1
[H]/N=C(/Nc1ccccc1C)\N/C(/N)=N/[H]	1-(diaminomethylidene)-2-(2-methylphenyl)guanidine	1-(diaminomethylidene)-2-(2-methylphenyl)guanidine 1-(diaminomethylene)-2-(2-methylphenyl)guanidine 93-69-6 92679-92-0 SBB016588 NSC164906 Maybridge4_003206 1-(o-Tolyl)biguanide 424668_ALDRICH 1-o-Tolylbiguanide Aliant Biguanide, 1-o-tolyl- Imidodicarbonimidic diamide, N-(2-methylphenyl)- NSC51980 Sopanox Vulkacit 1000 o-Tolylbiguanide 2-Tolylbiguanide 4-12-00-01764 (Beilstein Handbook Reference)…	93-69-6 92679-92-0
C(c1ccco1)[n]1cccc1		1-(furan-2-ylmethyl)pyrrole 1-(2-furylmethyl)pyrrole 1438-94-4 97558-64-0 1-(2-Furanylmethyl)-1H-pyrrole 1-(2-Furfuryl)pyrrole 1-FURFURYLPYRROLE 1-Furfuryl-1H-pyrrole 1H-Pyrrole, 1-(2-furanylmethyl)- 5-20-05-00033 (Beilstein Handbook Reference) BRN 0118476 EINECS 215-876-1 FEMA No. 3284 N-(2-Furfuryl)pyrrole N-Furfuryl pyrrole N-Furfurylpyrrole Pyrrole, 1-furfuryl- 264717_ALDRICH W328405_ALDRICH …	1438-94-4 97558-64-0
CC1(C)C(=O)NC(=O)N1CO	1-(hydroxymethyl)-5,5-dimethylimidazolidine-2,4-dione	1-(hydroxymethyl)-5,5-dimethylimidazolidine-2,4-dione 1-(hydroxymethyl)-5,5-dimethyl-imidazolidine-2,4-dione 5,5-dimethyl-1-methylol-hydantoin 116-25-6 27636-82-4 NSC 9185 1-Monomethylol-5,5-dimethylhydantoin GlycoServe ZINC00156245 Hydantoin, 1-(hydroxymethyl)-5,5-dimethyl- (8CI) Monomethylol dimethyl hydantoin MDM Hydantoin (VAN) NCGC00164225-01 EINECS 204-132-1 1-(Hydroxymethyl)-5,5-dimethyl h…	116-25-6 27636-82-4
CC(C)(CCC)OC(C)C(F)(F)C(F)(F)C(F)(F)C(F)(F)C(F)(F)C(F)(F)F	1,1,1,2,2,3,3,4,4,5,5,6,6-tridecafluoro-7-(2-methylpentan-2-yloxy)octane	1,1,1,2,2,3,3,4,4,5,5,6,6-tridecafluoro-7-(2-methylpentan-2-yloxy)octane 7-(1,1-dimethylbutoxy)-1,1,1,2,2,3,3,4,4,5,5,6,6-tridecafluoro-octane 7-(1,1-dimethylbutoxy)-1,1,1,2,2,3,3,4,4,5,5,6,6-tridecafluorooctane
COC(F)(F)C(F)(F)C(F)(F)C(F)(F)F	1,1,1,2,2,3,3,4,4-nonafluoro-4-methoxybutane	1,1,1,2,2,3,3,4,4-nonafluoro-4-methoxybutane 1,1,1,2,2,3,3,4,4-nonafluoro-4-methoxy-butane 163702-07-6 Butane, 1,1,1,2,2,3,3,4,4-nonafluoro-4-methoxy-	163702-07-6
FC(C(F)(F)F)C(F)(F)F	1,1,1,2,3,3,3-Heptafluoropropane	1,1,1,2,3,3,3-Heptafluoropropane 431-89-0 2-Hydroheptafluoropropane InChI=1/C3HF7/c4-1(2(5,6)7)3(8,9)10/h1 2H-Heptafluoropropane Apaflurane [INN,BAN] CCRIS 7786 EINECS 207-079-2 Khladon 227 Propane, 1,1,1,2,3,3,3-heptafluoro- 2-Hydroperfluoropropane	431-89-0
FC(F)CC(F)(F)F	1,1,1,3,3-Pentafluoropropane	1,1,1,3,3-Pentafluoropropane 220035-33-6 460-73-1 1,1,1,3,3,3-Pentafluoropropane F 245fa HFC 245fa Propane, 1,1,1,3,3,3-pentafluoro- R 245fa	220035-33-6 460-73-1
CC(C)(O)C(Cl)(Cl)Cl	1,1,1-trichloro-2-methylpropan-2-ol	1,1,1-trichloro-2-methylpropan-2-ol 1,1,1-trichloro-2-methyl-propan-2-ol 28471-22-9 57-15-8 NCGC00159392-04 2-Propanol, trichloro-2-methyl- Chloretone (TN) 1,1,1-Trichloro-2-methyl-2-propanol hemihydrate D01942 20801_RIEDEL 91210_FLUKA EINECS 249-042-3 NSC44794 .beta.,.beta.,.beta.-Trichloro-tert-butyl alcohol 1,1,1-Trichloro-2-methyl-2-propanol 1,1,1-Trichloro-tert-butyl alcohol 2-(Trichlorometh…	28471-22-9 57-15-8
CC(Cl)(Cl)Cl	1,1,1-Trichloroethane	1,1,1-Trichloroethane 74552-83-3 71-55-6 1,1,1-trichlorethane CHEBI:36015 91099_FLUKA 1,1,1-Trichloroethane, technical grade 1,1,1-TCE 1,1,1-Trichloraethan [German] 1,1,1-Trichloroethane [UN2831] [Poison] 1,1,1-Tricloroetano [Italian] 4-01-00-00138 (Beilstein Handbook Reference) AI3-02061 BRN 1731614 Baltana CCRIS 1290 CF 2 Caswell No. 875 Chlorothene SM Cleanite Dowclene LS EINECS 200-756-3 EPA …	74552-83-3 71-55-6
FC1(F)C2(F)C(F)(C(F)(F)C(F)(F)C3(F)C2(F)C(F)(F)C(F)(F)C(F)(F)C3(F)F)C(F)(F)C(F)(F)C1(F)F	1,1,2,2,3,3,4,4,4a,4b,5,5,6,6,7,7,8,8,8a,9,9,10,10,10a-tetracosafluorophenanthrene	1,1,2,2,3,3,4,4,4a,4b,5,5,6,6,7,7,8,8,8a,9,9,10,10,10a-tetracosafluorophenanthrene 306-91-2 Perfluoroperhydrophenanthrene CHEBI:39423 Phenanthrene,tetracosafluorotetradecahydro- tetracosafluorotetradecahydrophenanthrene Perfluorophenanthrene Phenanthrene, tetracosafluorotetradecahydro-	306-91-2
FC(F)(F)C1(F)C2(F)C(F)(C(F)(F)C(F)(F)C(F)(F)C2(F)F)C(F)(F)C(F)(F)C1(F)F	1,1,2,2,3,3,4,4,4a,5,5,6,6,7,7,8,8a-heptadecafluoro-8-(trifluoromethyl)naphthalene	1,1,2,2,3,3,4,4,4a,5,5,6,6,7,7,8,8a-heptadecafluoro-8-(trifluoromethyl)naphthalene 1,1,2,2,3,3,4,4,4a,5,5,6,6,7,7,8,8a-heptadecafluoro-8-(trifluoromethyl)decalin 89591-63-9 51294-16-7 306-92-3 Heptadecafluorodecahydro-1-(trifluoromethyl)naphthalene Naphthalene, 1,1,2,2,3,3,4,4,4a,5,5,6,6,7,7,8,8a-heptadecafluorodecahydro-8-(trifluoromethyl)- 1,1,2,2,3,3,4,4,4a,5,5,6,6,7,7,8,8a-Heptadecafluorodeca…
FC(F)(F)C1(F)C(F)(F)C(F)(F)C(F)(F)C1(F)F		1,1,2,2,3,3,4,4,5-nonafluoro-5-(trifluoromethyl)cyclopentane 1805-22-7 Cyclopentane, nonafluoro(trifluoromethyl)- EINECS 217-298-5 Nonafluoro(trifluoromethyl)cyclopentane Perfluoromethylcyclopentane	1805-22-7
FC1(F)C(F)(C(F)(F)C(F)(F)C(F)(F)C1(F)C(F)(F)F)C(F)(F)F	1,1,2,2,3,3,4,5,5,6-Decafluoro-4,6-bis(trifluoromethyl)cyclohexane	1,1,2,2,3,3,4,5,5,6-Decafluoro-4,6-bis(trifluoromethyl)cyclohexane 79956-40-4 335-27-3 NSC 4782 Hexadecafluoro-1,3-dimethylcyclohexane (cis?) Perfluoro-1,3-dimethylcyclohexane 77268_FLUKA 282316_ALDRICH EINECS 206-386-9 Cyclohexane, 1,1,2,2,3,3,4,5,5,6-decafluoro-4,6-bis(trifluoromethyl)- Cyclohexane, decafluoro-1,3-bis(trifluoromethyl)- Cyclohexane, perfluoro-1,3-dimethyl- Decafluoro-1,3-bis(tri…
CC(C)CCCCC(OCC)OCC	1,1-diethoxy-6-methylheptane	1,1-diethoxy-6-methylheptane 1,1-diethoxy-6-methyl-heptane 69178-43-4 Isooctane, 1,1-diethoxy- iso-Octanal diethylacetal 1,1-Diethoxyisooctane EINECS 273-905-3	69178-43-4
CC(OCC)OCC		1,1-Diethoxyethane 73506-93-1 105-57-7 30846-29-8 1,1-Diaethoxy-aethan 1,1-Diethoxy-ethaan 1,1-Dietossietano Acetaal Acetal Acetal diethylique 1,1-Diaethoxy-aethan [German] Acetaldehyde, diethyl acetal Diaethylacetal Diethyl acetal AI3-24135 Acetaal [Dutch] Acetal (natural) WLN: 2OY1 & O2 Acetal diethylique [French] Acetaldehyde ethyl acetal Acetale [Italian] BRN 1098310 Diaethylacetal [German] D…	73506-93-1 105-57-7 30846-29-8
CC(F)F	1,1-DIFLUOROETHANE	1,1-DIFLUOROETHANE 71281-71-5 75-37-6 1, 1-Difluoroethane 4-01-00-00120 (Beilstein Handbook Reference) Algofrene type 67 BRN 1696900 CCRIS 8974 Difluoroethane Dymel 152 Dymel 152A EINECS 200-866-1 Ethane, 1,1-difluoro- Ethylene fluoride Ethylidene difluoride Ethylidene fluoride FC 152a Fluorocarbon 152a Freon 152a Genetron 100 Genetron 152a HFC 152a HSDB 5205 Halocarbon 152A Hydrofluorocarbon 152…	71281-71-5 75-37-6
CCCCCCC(OC)OC		1,1-Dimethoxyheptane 10032-05-0 ZINC01850763 547182_ALDRICH AI3-36020 Aldehyde C-7 dimethyl acetal EINECS 233-103-6 Enanthal dimethyl acetal FEMA No. 2541 Heptaldehyde dimethyl acetal Heptanal dimethyl acetal Heptane, 1,1-dimethoxy- Oenanthal dimethyl acetal Heptanal, dimethyl acetal W254201_ALDRICH	10032-05-0
CCCCCCC#CC(OC)OC		1,1-Dimethoxynon-2-yne 1-methoxynon-2-ynoxymethane 13257-44-8 2-NONYNAL, DIMETHYL ACETAL 2-Nonyl-1-al dimethyl acetal 2-Nonyn-1-al dimethylacetal 2-Nonynal dimethylacetal 2-Nonyne, 1,1-dimethoxy- AI3-36004 BRN 4372599 EINECS 236-249-9 Parmavert	13257-44-8
CCCCCCCC(OC)OC	1,1-Dimethoxyoctane	1,1-Dimethoxyoctane 10022-28-3 C-8 Dimethylacetal Caprylaldehyde dimethyl acetal EINECS 233-018-4 FEMA No. 2798 Octaldehyde dimethyl acetal Octanal dimethyl acetal Octane, 1,1-dimethoxy- 547204_ALDRICH AI3-36021	10022-28-3
O=C1NS(=O)(=O)c2ccccc12	1,1-dioxo-1,2-benzothiazol-3-one	1,1-dioxo-1,2-benzothiazol-3-one 1,1-diketo-1,2-benzothiazol-3-one 61255-27-4 81-07-2 126987-83-5 474-91-9 D01085 Saccharin (JP15/NF) Sweeta (TN) SPBio_001564 ST073992 240931_ALDRICH Spectrum_000213 ZINC02560357 DivK1c_000164 1,1-Dioxo-1,2-dihydro-1lambda*6*-benzo[d]isothiazol-3-one BAS 00293362 NCIOpen2_005140 InChI=1/C7H5NO3S/c9-7-5-3-1-2-4-6(5)12(10,11)8-7/h1-4H,(H,8,9 NCIOpen2_005180 KBioSS_0…	61255-27-4 81-07-2 126987-83-5 474-91-9
OC1CCCc2ccccc21	1,2,3,4-Tetrahydronaphthalen-1-ol	1,2,3,4-Tetrahydronaphthalen-1-ol Tetralin-1-ol 1-tetralinol 87248-51-9 529-33-9 .alpha.-Tetralol 1,2,3,4-Tetrahydro-.alpha.-naphthol 1,2,3,4-Tetrahydro-1-naphthol 1-Naphthalenol, 1,2,3,4-tetrahydro- 1,2,3,4-Tetrahydro-alpha-naphthol 1-Tetralol 1-Hydroxytetralin 3-06-00-02457 (Beilstein Handbook Reference) ()-1,2,3,4-Tetrahydro-1-naphthol WLN: L66&TJ GQ EINECS 208-459-0 NSC 5172 Tetrahydro-1-naph…	87248-51-9 529-33-9
CC(=O)OC(CC(=O)OCCCC)(CC(=O)OCCCC)C(=O)OCCCC	1,2,3-tributyl 2-acetyloxypropane-1,2,3-tricarboxylate	1,2,3-tributyl 2-acetyloxypropane-1,2,3-tricarboxylate 1,2,3-tributyl 2-acetoxypropane-1,2,3-tricarboxylate 77-90-7 37070-91-0 NCGC00164157-01 2-(Acetyloxy)-1,2,3-propanetricarboxylic acid, tributyl ester 2-Acetyltributylcitrate AI3-01999 Acetylcitric acid, tributyl ester BRN 2303316 CCRIS 3409 Caswell No. 005AB Citric acid, tributyl ester, acetate (8CI) EINECS 201-067-0 FEMA No. 3080 HSDB 656 NS…	77-90-7 37070-91-0
CCOC(=O)C(O)(CC(=O)OCC)CC(=O)OCC	1,2,3-triethyl 2-hydroxypropane-1,2,3-tricarboxylate	1,2,3-triethyl 2-hydroxypropane-1,2,3-tricarboxylate 77-93-0 Triethyl citrate WLN: 2OV1XQVO2&1VO2 109290_ALDRICH ZINC01648322 2-Hydroxy-1,2,3-propanetricarboxylic acid, delta triethyl ester 2-Hydroxy-1,2,3-propanetricarboxylic acid, triethyl ester 4-03-00-01276 (Beilstein Handbook Reference) AI3-00659 BRN 1801199 EINECS 201-070-7 Eudraflex FEMA No. 3083 HSDB 729 Hydragen CAT NSC 8907 Triaethylcit…	77-93-0
CC=Cc1cc(OC)c(cc1)OC		1,2-dimethoxy-4-prop-1-enylbenzene 1,2-dimethoxy-4-[(E)-prop-1-enyl]benzene 1,2-dimethoxy-4-prop-1-enyl-benzene 93-16-3 6379-72-2 54349-79-0 W247618_ALDRICH 4-trans-Propenylveratrole BRN 1911285 Benzene, 1,2-dimethoxy-4-propenyl-, (E)- EINECS 228-958-7 trans-4-Propenylveratrole ZINC00404370 1,3,4-Isoeugenol methyl ether 1-(3,4-Dimethoxyphenyl)-1-propene 1-Propene, 1-(3,4-dimethoxyphenyl)- 1-Verat…
COc1ccccc1OC	1,2-Dimethoxybenzene	1,2-Dimethoxybenzene 91-16-7 140155_ALDRICH 94840_FLUKA Benzene, 1,2-dimethoxy- Benzene, o-dimethoxy- NSC16934 O,O-Dimethyl catechol Pyrocatechol dimethyl ether VERATROLE Veratrol WLN: 1OR BO1 o-Dimethoxybenzene InChI=1/C8H10O2/c1-9-7-5-3-4-6-8(7)10-2/h3-6H,1-2H 2-Dimethoxybenzol 2-Methoxyanisole AI3-02281 Brenzkatechindimethylether Catechol dimethyl ether Dimethylether pyrokatechinu [Czech] EINE…	91-16-7
CC1C=CCCC1(C)C=O		1,2-dimethylcyclohex-3-ene-1-carbaldehyde 1,2-dimethyl-1-cyclohex-3-enecarboxaldehyde 27939-60-2 3-Cyclohexene-1-carboxaldehyde, dimethyl- Dimethyl-3-cyclohexene-1-carboxaldehyde Dimethylcyclohex-3-ene-1-carbaldehyde EINECS 248-742-6 Trivertal	27939-60-2
CN1C(=O)C2C(N=CN2C)N(C)C1=O	1,3,7-trimethyl-4,5-dihydropurine-2,6-dione	1,3,7-trimethyl-4,5-dihydropurine-2,6-dione 1,3,7-trimethyl-4,5-dihydropurine-2,6-quinone 1,3,7-Trimethylxanthine, TMS Caffeine TMS
O=Cc1cc2OCOc2cc1	1,3-benzodioxole-5-carbaldehyde	1,3-benzodioxole-5-carbaldehyde 1,3-Benzodioxole-5-carboxaldehyde 30024-74-9 120-57-0 SBB007752 FR-0263 W291102_ALDRICH P49104_ALDRICH 3,4-METHYLEN-DIOXY-BENZALDEHYDE InChI=1/C8H6O3/c9-4-6-1-2-7-8(3-6)11-5-10-7/h1-4H,5H NCGC00091137-01 3,4-Dimethylenedioxybenzaldehyde 3,4-Methylene-dihydroxybenzaldehyde 3,4-Methylenedioxybenzaldehyde AI3-01198 CCRIS 5928 Dioxymethylene protocatechuic aldehyde EIN…
CC1(C)C(=O)N(CCO)C(=O)N1CCO	1,3-Bis(2-hydroxyethyl)-5,5-dimethylimidazolidine-2,4-dione	1,3-Bis(2-hydroxyethyl)-5,5-dimethylimidazolidine-2,4-dione 1,3-bis(2-hydroxyethyl)-5,5-dimethyl-imidazolidine-2,4-dione 1,3-bis(2-hydroxyethyl)-5,5-dimethyl-hydantoin 26850-24-8 DEDM Hydantoin Hydantoin, 1,3-bis(2-hydroxyethyl)-5,5-dimethyl- EINECS 248-052-5 Diethylol dimethyl hydantoin 1,3-Bis(2-hydroxyethyl)-5,5-dimethyl-2,4-imidazolidinedione 1,3-Di(hydroxyethyl)-5,5-dimethylhydantoin 2,4-Imi…	26850-24-8
CC(C)(C)CC(C)CC(=O)OC(COC(=O)CC(C)CC(C)(C)C)COC(=O)CC(C)CC(C)(C)C	1,3-bis(3,5,5-trimethylhexanoyloxy)propan-2-yl 3,5,5-trimethylhexanoate	1,3-bis(3,5,5-trimethylhexanoyloxy)propan-2-yl 3,5,5-trimethylhexanoate [2-(3,5,5-trimethylhexanoyloxy)-1-(3,5,5-trimethylhexanoyloxymethyl)ethyl] 3,5,5-trimethylhexanoate 3,5,5-trimethylhexanoic acid [2-(3,5,5-trimethyl-1-oxohexoxy)-1-[(3,5,5-trimethyl-1-oxohexoxy)methyl]ethyl] ester 3,5,5-trimethylhexanoic acid [2-(3,5,5-trimethylhexanoyloxy)-1-(3,5,5-trimethylhexanoyloxymethyl)ethyl] ester 565…	56554-53-1
CC(=O)OC(COC(C)=O)COC(C)=O		1,3-diacetyloxypropan-2-yl acetate [2-acetoxy-1-(acetoxymethyl)ethyl] acetate acetic acid [2-acetoxy-1-(acetoxymethyl)ethyl] ester 1,3-diacetyloxypropan-2-yl ethanoate 102-76-1 LS-2356 NCGC00091612-04 InChI=1/C9H14O6/c1-6(10)13-4-9(15-8(3)12)5-14-7(2)11/h9H,4-5H2,1-3H Spectrum5_001376 DivK1c_000740 NCGC00091612-01 NINDS_000740 propane-1,2,3-triyl triacetate Spectrum2_000939 KBio3_002116 SPECTRUM1…	102-76-1
CNC(=O)NC	1,3-Dimethylurea	1,3-Dimethylurea 96-31-1 475470-59-8 NSC24823 WLN: 1MVM1 Urea, N,N'-dimethyl- ZINC01653257 N,N'-Dimethylharnstoff c1155 NSC14910 Symmetric dimethylurea Urea, 1,3-dimethyl- 15450_RIEDEL N,N&#8242;-Dimethylurea sym-Dimethylurea 36574_RIEDEL 1.3-Dimethylurea 4-04-00-00207 (Beilstein Handbook Reference) AI3-24386 BRN 1740672 CCRIS 2509 EINECS 202-498-7 HSDB 3423 N,N'-Dimethylharnstoff [German] NSC 14…
C1OCCO1	1,3-DIOXOLANE	1,3-DIOXOLANE 646-06-0 InChI=1/C3H6O2/c1-2-5-3-4-1/h1-3H 184497_ALDRICH Ethylene glycol methylene ether Formaldehyde ethylene acetal 271020_ALDRICH ZINC02031535 1,3-Dioxacyclopentane 1,3-Dioxolan 1,3-Dioxole, dihydro- CCRIS 4912 Dioxolan [Czech] Dioxolane [UN1166] [Flammable liquid] EINECS 211-463-5 Ethylene glycol formal Formal glycol Glycol formal Glycol methylene ether Glycolformal HSDB 5737 U…
O=C1NCCS1	1,3-thiazolidin-2-one	1,3-thiazolidin-2-one Thiazolidin-2-one 2-Thiazolidinone 2682-49-7 ZINC03887192 NSC122613 NSC 122613	2682-49-7
CC(C)COC(=O)C(CC(=O)OCC(C)C)S(O)(=O)=O	1,4-bis(2-methylpropoxy)-1,4-dioxobutane-2-sulfonic acid	1,4-bis(2-methylpropoxy)-1,4-dioxobutane-2-sulfonic acid 1,4-diisobutoxy-1,4-dioxo-butane-2-sulfonic acid 1,4-diisobutoxy-1,4-dioxobutane-2-sulfonic acid 1,4-diisobutoxy-1,4-diketo-butane-2-sulfonic acid 1,4-bis(2-methylpropoxy)-1,4-dioxo-butane-2-sulfonic acid
Cc1ccc(cc1)Nc1ccc(Nc2ccc(C)cc2)c2c1C(=O)c1ccccc1C2=O	1,4-bis[(4-methylphenyl)amino]anthracene-9,10-dione	1,4-bis[(4-methylphenyl)amino]anthracene-9,10-dione 1,4-bis[(4-methylphenyl)amino]-9,10-anthraquinone 54848-06-5 60880-53-7 64553-67-9 128-80-3 ZINC03861500 1,4-Bis((4-methylphenyl)amino)-9,10-anthracenedione 1,4-Bis(p-tolylamino)anthraquinone 1,4-DI(P-TOLUIDINO)ANTHRAQUINONE 4-14-00-00460 (Beilstein Handbook Reference) 9,10-Anthracenedione, 1,4-bis((4-methylphenyl)amino)- Anthcoquinone Cyanine G…	54848-06-5 60880-53-7 64553-67-9 128-80-3
Nc1ccc(N)c2c1C(=O)c1ccccc1C2=O	1,4-diaminoanthracene-9,10-dione	1,4-diaminoanthracene-9,10-dione 1,4-Diamino-9,10-anthraquinone 168681-27-4 128-95-0 1,4-Diaminoanthrachinon NSC7833 NCIMech_000274 367834_ALDRICH 1,4-Anthraquinonyldiamine 1,4-DIAMINO-9,10-ANTHRACENEDIONE 1,4-Diamino-9-10-anthraquinone 1,4-Diaminoanthrachinon [Czech] 1,4-Diaminoanthraquinone 9,10-Anthracenedione, 1,4-diamino- Acetate Red Violet R Acetoquinone Light Heliotrope NL Acetylon Fast Re…	168681-27-4 128-95-0
CC(=O)COC(COCC(C)=O)COCC(C)=O	1-[1,3-bis(2-oxopropoxy)propan-2-yloxy]propan-2-one	1-[1,3-bis(2-oxopropoxy)propan-2-yloxy]propan-2-one 1-[2-acetonyloxy-1-(acetonyloxymethyl)ethoxy]propan-2-one 1-[2-acetonyloxy-1-(acetonyloxymethyl)ethoxy]acetone 228412-89-3 68958-64-5 POLYOXYL 25 GLYCERYL TRIOLEATE Poly(oxy-1,2-ethanediyl), alpha,alpha',alpha''-1,2,3-propanetriyltris(omega-(((9Z)-1-oxo-9-octadecenyl)oxy)-
OCC1OC(C(O)C1O)N1C=CC(=O)NC1=O	1-[3,4-dihydroxy-5-(hydroxymethyl)oxolan-2-yl]pyrimidine-2,4-dione	1-[3,4-dihydroxy-5-(hydroxymethyl)oxolan-2-yl]pyrimidine-2,4-dione 1-[3,4-dihydroxy-5-(hydroxymethyl)tetrahydrofuran-2-yl]pyrimidine-2,4-dione 1-[3,4-dihydroxy-5-(hydroxymethyl)-2-tetrahydrofuranyl]pyrimidine-2,4-dione 1-(3,4-dihydroxy-5-methylol-tetrahydrofuran-2-yl)pyrimidine-2,4-quinone 3083-77-0 58-96-8 40436-51-9 NCIOpen2_003486 NCI60_032162 NSC240592 Uridine-5-d 1-.beta.-D-Arabinofuranosylu…
O=C1c2c3Nc4ccc5c(c4Nc3ccc2C(=O)c2ccccc12)C(=O)c1ccccc1C5=O		11098-09-2 11129-81-0 192588-24-2 39280-72-3 50814-33-0 50926-10-8 81-77-6 5-24-09-00504 (Beilstein Handbook Reference) ZINC03873986 5,9,14,18-Anthrazinetetrone, 6,15-dihydro- 6,15-Dihydro-5,9,14,18-anthrazinetetrone Anthraquinone Deep Blue Anthraquinone blue Atic Vat Blue XRN Benzadone Blue RS Blue O Blue anthraquinone pigment C.I. 69800 C.I. Pigment Blue 60 C.I. Vat Blue 4 C.I. wet blue 4 Calco…	11098-09-2 11129-81-0 192588-24-2 39280-72-3 50814-33-0 50926-10-8 81-77-6
CC[n]1c2cc3OC4C(=Nc3cc2c2ccccc12)C(Cl)=C1Oc2cc3c(cc2N=C1C=4Cl)c1ccccc1[n]3CC		12698-54-3 6358-30-1 65381-32-0 Sanyo Permanent Violet BL-D 422 Sumikacoat Fast Violet RSB Sumitone Fast Violet RL Sumitone Fast Violet RL 4R Sumitone Fast Violet RLS Symuler Fast Violet BBL Symuler Fast Violet BBLN Unisperse Violet B-E Vynamon Violet 2B 8,18-Dichloro-5,15-diethyl-5,15-dihydrodiindolo(3,2-b:3',2'-m)tri- phenodioxazine 8,18-Dichloro-5,15-diethyl-5,15-dihydrodiindolo(3,2-b:3',2'-m)…	12698-54-3 6358-30-1 65381-32-0
CNCCCCCCCCCCC(C)=O	12-methylaminododecan-2-one	12-methylaminododecan-2-one
CC1CO1		16033-71-9 75-56-9 56671_FLUKA 1,2-Epoxypropane 1,2-PROPYLENE OXIDE 2,3-Epoxypropane 5-17-01-00017 (Beilstein Handbook Reference) AD 6 (suspending agent) AI3-07541 BRN 0079763 CCRIS 540 Caswell No. 713A EINECS 200-879-2 EPA Pesticide Chemical Code 042501 Epoxypropane Ethylene oxide, methyl- HSDB 173 Methyl ethylene oxide Methyl oxirane Methyloxacyclopropane Methyloxirane NCI-C50099 Oxirane, methy…	16033-71-9 75-56-9
CCCCCCC(CCOC(C)=O)OC(C)=O	1-acetyloxynonan-3-yl acetate	1-acetyloxynonan-3-yl acetate 1-(2-acetoxyethyl)heptyl acetate acetic acid 1-(2-acetoxyethyl)heptyl ester 1-acetyloxynonan-3-yl ethanoate 63270-14-4 EINECS 264-060-1 Nonane-1,3-diyl diacetate 1,3-Nonanediol, diacetate	63270-14-4
Nc1c2c(c(cc1S(O)(=O)=O)NC1CCCCC1)C(=O)c1ccccc1C2=O		1-amino-4-(cyclohexylamino)-9,10-dioxoanthracene-2-sulfonic acid 1-amino-4-(cyclohexylamino)-9,10-dioxo-anthracene-2-sulfonic acid 1-amino-4-(cyclohexylamino)-9,10-dioxo-2-anthracenesulfonic acid 1-amino-4-(cyclohexylamino)-9,10-diketo-anthracene-2-sulfonic acid 1-Amino-4-(cyclohexylamino)-9,10-dihydro-9,10-dioxoanthracene-2-sulphonic acid 2-Anthracenesulfonic acid, 1-amino-4-(cyclohexylamino)-9,…
FC(F)(F)C(F)(F)C(F)(F)C(F)(F)C(F)(F)C(F)(F)C(F)(F)C(F)(F)Br	1-bromo-1,1,2,2,3,3,4,4,5,5,6,6,7,7,8,8,8-heptadecafluorooctane	1-bromo-1,1,2,2,3,3,4,4,5,5,6,6,7,7,8,8,8-heptadecafluorooctane 1-bromo-1,1,2,2,3,3,4,4,5,5,6,6,7,7,8,8,8-heptadecafluoro-octane 423-55-2 D05439 Imagent Imagent (TN) Perflubron (USP) Perfluorooctylbromide 343862_ALDRICH Heptadecafluorooctyl bromide 1-Bromoheptadecafluorooctane 1-Bromoperfluorooctane EINECS 207-028-4 Imagent GI LiquiVent Long's compound OCTANE, 1-BROMOHEPTADECAFLUORO- Octane, 1-br…
CC(F)(F)Cl	1-Chloro-1,1-difluoroethane	1-Chloro-1,1-difluoroethane 1-chloro-1,1-difluoro-ethane 65762-25-6 75-68-3 295256_ALDRICH .alpha.-Chloroethylidene fluoride 1,1-Difluoro-1-chloroethane 1-Chloro-1,1-difluoroethane or Refrigerant gas R 142b [UN2517] [Flammable gas] 4-01-00-00127 (Beilstein Handbook Reference) BRN 1731584 CFC 142b Chlorodifluoroethane Chloroethylidene fluoride Chlorofluorocarbon 142b Difluoro-1-chloroethane EINECS…	65762-25-6 75-68-3
FC(F)=C(F)Cl		1-chloro-1,2,2-trifluoroethene 1-chloro-1,2,2-trifluoro-ethylene 1-Chloro-1,2,2-trifluoroethylene 1-chloro-1,2,2-trifluoro-ethene 105864-12-8 27837-89-4 39360-67-3 39403-94-6 39475-51-9 50935-29-0 52350-38-6 52683-04-2 52932-38-4 56749-16-7 57176-52-0 58339-48-3 58339-49-4 58339-57-4 58339-65-4 59889-02-0 69494-42-4 8045-75-8 84842-77-3 9002-83-9 9036-80-0 79-38-9 Kel-F 3 Kel-F 6061 Kel-F 81 Kel-…	105864-12-8 27837-89-4 39360-67-3 39403-94-6 39475-51-9 50935-29-0 52350-38-6 52683-04-2 52932-38-4 56749-16-7 57176-52-0 58339-48-3 58339-49-4 58339-57-4 58339-65-4 59889-02-0 69494-42-4 8045-75-8 84842-77-3 9002-83-9 9036-80-0 79-38-9
CC(O)CN(C)C	1-dimethylaminopropan-2-ol	1-dimethylaminopropan-2-ol 53657-16-2 108-16-7 1-(Dimethylamino)-2-propanol 2-Propanol, 1,1-(dimethylamino)- 2-Propanol, 1-(dimethylamino)- Dimethyl(2-hydroxypropyl)amine Dimethylisopropanolamine N,N-(Dimethylamino)-2-propanol N,N-Dimethyl-2-hydroxypropylamine N,N-Dimethylisopropanolamine NSC3163 WLN: QY1 & 1N1 & 1 1-Dimethylamino-2-propanol 39300_FLUKA 1-Dimethylamino-2-propanol solution 470228_…	53657-16-2 108-16-7
Cc1ccccc1C=C	1-Ethenyl-2-methylbenzene	1-Ethenyl-2-methylbenzene 1-methyl-2-vinyl-benzene 1-Methyl-2-vinylbenzene 1-ethenyl-2-methyl-benzene 9017-21-4 9036-57-1 51434-12-9 611-15-4 69180_FLUKA Benzene, ethenylmethyl-, homopolymer 2-Methylstyrene 2-Vinyltoluene 4-05-00-01367 (Beilstein Handbook Reference) BRN 1901764 Benzene, 1-ethenyl-2-methyl- (9CI) EINECS 210-256-7 O-METHYLSTYRENE Styrene, o-methyl- o-Vinyltoluene ortho-Methylstyren…	9017-21-4 9036-57-1 51434-12-9 611-15-4
C=CN1CCCCCC1=O		1-ethenylazepan-2-one 1-vinyl-2-azepanone 25189-83-7 146876-34-8 2235-00-9 1-vinylazepan-2-one InChI=1/C8H13NO/c1-2-9-7-5-3-4-6-8(9)10/h2H,1,3-7H 1-Ethenylhexahydro-2H-azepin-2-one 1-Vinylhexahydro-2H-azepin-2-one 2H-Azepin-2-one, 1-ethenylhexahydro- 415464_ALDRICH N-Vinylcaprolactam 2H-Azepin-2-one, 1-ethenylhexahydro-, homopolymer Poly-N-vinylcaprolactam EINECS 218-787-6 ZINC00395596	25189-83-7 146876-34-8 2235-00-9
CCOC(F)(F)C(F)(F)C(F)(F)C(F)(F)F	1-ethoxy-1,1,2,2,3,3,4,4,4-nonafluorobutane	1-ethoxy-1,1,2,2,3,3,4,4,4-nonafluorobutane 1-ethoxy-1,1,2,2,3,3,4,4,4-nonafluoro-butane 163702-05-4 Butane, 1-ethoxy-1,1,2,2,3,3,4,4,4-nonafluoro-	163702-05-4
CCOC(F)(F)C(F)(C(F)(F)F)C(F)(F)F		1-ethoxy-1,1,2,3,3,3-hexafluoro-2-(trifluoromethyl)propane 163702-06-5 Propane, 2-(ethoxydifluoromethyl)-1,1,1,2,3,3,3-heptafluoro-	163702-06-5
CC(C)CCCC(C)CCOCC	1-ethoxy-3,7-dimethyloctane	1-ethoxy-3,7-dimethyloctane 1-ethoxy-3,7-dimethyl-octane 22810-10-2 EINECS 245-237-2 Octane, 1-ethoxy-3,7-dimethyl- 3,7-Dimethyloctyl ethyl ether
CCOc1ccc(CC)cc1	1-Ethoxy-4-ethylbenzene	1-Ethoxy-4-ethylbenzene 1-ethoxy-4-ethyl-benzene 1585-06-4 Benzene, 1-ethoxy-4-ethyl- EINECS 216-438-2 p-Ethylphenetole
CCN1CCCC1=O	1-Ethylpyrrolidin-2-one	1-Ethylpyrrolidin-2-one 1-ETHYL-2-PYRROLIDINONE 1-Ethyl-2-pyrrolidone 2687-91-4 InChI=1/C6H11NO/c1-2-7-5-3-4-6(7)8/h2-5H2,1H NCGC00160611-01 NCGC00160611-02 04810_FLUKA 2-Pyrrolidinone, 1-ethyl- 5-21-06-00328 (Beilstein Handbook Reference) BRN 0107971 EINECS 220-250-6 N-Ethylpyrrolidinone N-Ethylpyrrolidone ZINC03861141 146358_ALDRICH	2687-91-4
C1C=Cc2ccccc21		1H-Indene 71551-80-9 9003-64-9 95-13-6 Indene Indonaphthene NSC9270 WLN: L56 BHJ ST5214452 1H-inden-1-ylidene InChI=1/C9H8/c1-2-5-9-7-3-6-8(9)4-1/h1-6H,7H EINECS 202-393-6 HSDB 5286 NSC62567 193828_ALDRICH NSC 9270 CHEBI:33052 168769_ALDRICH CHEBI:41921 I2800_ALDRICH Indenyl radical Inden
c1cccc2[nH]ccc21		1H-Indole 120-72-9 I3408_ALDRICH INDOLE 1-Benzo(b)pyrrole 2,3-Benzopyrole AI3-01540 CCRIS 4421 Caswell No. 498B EINECS 204-420-7 EPA Pesticide Chemical Code 025000 FEMA No. 2593 HSDB 599 Indol [German] Indole (natural) NSC 1964 INDOLE BENZO-PYRROLE InChI=1/C8H7N/c1-2-4-8-7(3-1)5-6-9-8/h1-6,9 CHEBI:16881 2,3-Benzopyrrole C00463 SB 00587 1H-Benzo[b]pyrrole 269077_ALDRICH Benzo[b]pyrrole LS-2832 442…	120-72-9
O=C1c2ccccc2NC1=O	1H-Indole-2,3-dione	1H-Indole-2,3-dione Indoline-2,3-dione Isatin 84788-92-1 91-56-5 5815-00-9 5-21-10-00221 (Beilstein Handbook Reference) AI3-03111 BRN 0383659 EINECS 202-077-8 NSC 9262 Tribulin SBB009100 58240_FLUKA S00335a ISN InChI=1/C8H5NO2/c10-7-5-3-1-2-4-6(5)9-8(7)11/h1-4H,(H,9,10,11 2,3-Diketoindoline 2,3-Dioxo-2,3-dihydroindole 2,3-Dioxoindoline 2,3-Indolinedione 2,3-Ketoindoline Indole-2,3-dione Isatic ac…	84788-92-1 91-56-5 5815-00-9
OC1=CC=NC(=O)N1		1H-pyrimidine-2,4-dione URACIL 66-22-8 16908-84-2 144104-68-7 42910-77-0 4433-21-0 4433-24-3 766-19-8 24897-50-5 2,4(1H,3H)-Pyrimidinedione, labeled with tritium NCI60_003718 InChI=1/C4H4N2O2/c7-3-1-2-5-4(8)6-3/h1-2H,(H2,5,6,7,8 U1128_SIGMA AC-907/30002021 CHEBI:17568 Urazil NSC29742 Uracil-5-d NCIMech_000782 STK301734 2,4-(1H,3H)-pyrimidinedione (9CI) ST5165192 U0750_SIGMA C00106 AI3-25470 BMS 2…
ON1C(O)Cc2ccccc12		1-hydroxy-2,3-dihydroindol-2-ol 1-hydroxyindolin-2-ol 1-hydroxy-2-indolinol
CC(=C)C(=O)OC(C)CO	1-hydroxypropan-2-yl 2-methylprop-2-enoate	1-hydroxypropan-2-yl 2-methylprop-2-enoate (2-hydroxy-1-methyl-ethyl) 2-methylprop-2-enoate 2-methylprop-2-enoic acid (2-hydroxy-1-methylethyl) ester 2-methylacrylic acid (2-hydroxy-1-methyl-ethyl) ester 51424-40-9 51480-40-1 63625-57-0 99609-88-8 4664-49-7 124742-02-5 138258-23-8 191411-56-0 204013-27-4 27072-46-4 27813-02-1 30348-68-6 32073-20-4 50851-93-9 50975-16-1 1,2-Propanediol, 2-methyl, …	51424-40-9 51480-40-1 63625-57-0 99609-88-8 4664-49-7 124742-02-5 138258-23-8 191411-56-0 204013-27-4 27072-46-4 27813-02-1 30348-68-6 32073-20-4 50851-93-9 50975-16-1
ON1C(=O)CCC1=O	1-hydroxypyrrolidine-2,5-dione	1-hydroxypyrrolidine-2,5-dione 1-hydroxypyrrolidine-2,5-quinone 6066-82-6 130672_ALDRICH HOSu InChI=1/C4H5NO3/c6-3-1-2-4(7)5(3)8/h8H,1-2H 1-Hydroxy-2,5-pyrrolidinedione 1-Hydroxysuccinimide 2,5-Pyrrolidinedione, 1-hydroxy- Hydroxysuccinimide N-Hydroxysuccinimide NSC74335 Succinimide, N-hydroxy- T0518-8029 ZINC01446435 CCRIS 2604 EINECS 228-001-3 NSC 74335 Succinimide, N-hydroxy- (8CI) 56480_FLUKA…
COc1ccccc1OCC=C		1-methoxy-2-prop-2-enoxybenzene 1-allyloxy-2-methoxy-benzene 1-allyloxy-2-methoxybenzene 1-methoxy-2-prop-2-enoxy-benzene 4125-43-3 EINECS 223-935-8 (2-methoxyphenyl) (2-propenyl) ether 1-(allyloxy)-2-methoxybenzene InChI=1/C10H12O2/c1-3-8-12-10-7-5-4-6-9(10)11-2/h3-7H,1,8H2,2H 2-Allyloxyanisole allyl o-anisyl ether NSC 76097 AI3-20936 allyl (2-methoxyphenyl) ether Allyl o-methoxyphenyl ether Ben…	4125-43-3
COCCCOCCCOC		1-methoxy-3-(3-methoxypropoxy)propane 111109-77-4 Dipropylene glycol dimethyl ether Propane, oxybis(methoxy-	111109-77-4
COc1ccc(CC=C)cc1	1-methoxy-4-prop-2-enylbenzene	1-methoxy-4-prop-2-enylbenzene 1-allyl-4-methoxy-benzene 1-Allyl-4-methoxybenzene 1-methoxy-4-prop-2-enyl-benzene 140-67-0 1407-27-8 77525-18-9 C10452 Estragole 34098_RIEDEL 05818_FLUKA Estragol NSC404113 WLN: 1U2R DO1 Methylchavicol NCGC00091434-02 NCGC00091434-01 W241105_ALDRICH A29208_ALDRICH BENZENE,1-ALLYL,4-METHOXY METHYLCHAVICOL InChI=1/C10H12O/c1-3-4-9-5-7-10(11-2)8-6-9/h3,5-8H,1,4H2,2H S…	140-67-0 1407-27-8 77525-18-9
CCCc1ccc(cc1)OC		1-Methoxy-4-propylbenzene 1-methoxy-4-propyl-benzene 104-45-0 SBB007737 FR-0223 W293008_ALDRICH 4-06-00-03181 (Beilstein Handbook Reference) 4-Propylmethoxybenzene AI3-03434 BRN 2042121 EINECS 203-203-4 FEMA No. 2930 Methyl p-propylphenyl ether NSC 37996 P-(N-PROPYL)ANISOLE p-Propyl anisole p-Propylmethoxybenzene p-n-Propyl anisole 4-Propylanisole 4-n-Propylanisole Anisole, p-propyl- Benzene, 1-m…	104-45-0
CCCCCCOC	1-Methoxyhexane	1-Methoxyhexane 4747-07-3 EINECS 225-263-0 Hexane, 1-methoxy- Methyl hexyl ether Methyl-n-Hexyl ether Ether, hexyl methyl ZINC02560611	4747-07-3
CCCC(S)CCOC		1-Methoxyhexane-3-thiol 94291-50-6 3-Hexanethiol, 1-methoxy- EINECS 304-874-7	94291-50-6
COCC(C)O	1-Methoxypropan-2-ol	1-Methoxypropan-2-ol 107-98-2 58769-19-0 65280_FLUKA InChI=1/C4H10O2/c1-4(5)3-6-2/h4-5H,3H2,1-2H 484407_ALDRICH Propyleneglycol monomethyl ether 1-Methoxy-2-propanol [UN3092] [Flammable liquid] 3-01-00-02146 (Beilstein Handbook Reference) AI3-15573 BRN 1731270 Closol Dowanol 33B EINECS 203-539-1 HSDB 1016 Methoxyisopropanol Methyl proxitol NSC 2409 PGME Poly-Solve MPM Propasol solvent M Propylene…	107-98-2 58769-19-0
CC(=O)c1cccc2ccccc21		1-naphthalen-1-ylethanone 1-(1-naphthyl)ethanone 941-98-0 NSC7659 67990_FLUKA 276766_ALDRICH ghl.PD_Mitscher_leg0.724 ZINC01688258 .alpha.-Acetonaphthone .alpha.-Acetylnaphthalene .alpha.-Naphthyl methyl ketone 1'-Acetonaphthone 1-(1-Naphthalenyl)ethanone 1-Acetonaphthalene 1-Acetonaphthone 1-Acetylnaphthalene ST5213423 InChI=1/C12H10O/c1-9(13)11-8-4-6-10-5-2-3-7-12(10)11/h2-8H,1H 1-Naphthyl meth…
CC(=O)c1ccccc1	1-Phenylethanone	1-Phenylethanone 98-86-2 Hypnon Hypnone Ketone, methyl phenyl- NSC7635 Usaf ek-496 WLN: 1VR W200905_ALDRICH 42163_FLUKA 442438_SUPELCO A10701_ALDRICH 00790_FLUKA c0117 1-phenylethan-1-one AIDS-017929 AIDS017929 InChI=1/C8H8O/c1-7(9)8-5-3-2-4-6-8/h2-6H,1H AC0 CHEBI:27632 ST5213401 ZINC00896628 AI3-00575 Acetofenon [Czech] Acetylbenzol Benzene, acetyl- Benzoylmethide CCRIS 1341 EINECS 202-708-7 FEM…
CCC(=O)OC(C)c1ccccc1	1-phenylethyl propanoate	1-phenylethyl propanoate propanoic acid 1-phenylethyl ester propionic acid 1-phenylethyl ester 117405-47-7 120-45-6 W268909_ALDRICH .alpha.-Methylbenzyl propionate Benzenemethanol, .alpha.-methyl-, propanoate Benzyl alcohol, .alpha.-methyl-, propionate NSC406571 Styrolyl propionate 1-Phenyl-1-ethyl propionate 1-Phenylethyl propionate 3-06-00-01680 (Beilstein Handbook Reference) AI3-04100 BENZYL A…	117405-47-7 120-45-6
CCCOCC(C)O		1-Propoxypropan-2-ol 1569-01-3 2-Propanol, 1-propoxy- 3-01-00-02147 (Beilstein Handbook Reference) BRN 1732636 EINECS 216-372-4 HSDB 6482 PROPASOL Solvent P Propylene glycol n-propyl ether Propylene glycol-n-monopropyl ether NCGC00090992-01 484326_ALDRICH DOWANOL PnP 424927_ALDRICH 1-PROPOXY-2-PROPANOL	1569-01-3
Cc1ccc(c(c1)OC)C(C)(C)C	1-tert-butyl-2-methoxy-4-methylbenzene	1-tert-butyl-2-methoxy-4-methylbenzene 1-tert-butyl-2-methoxy-4-methyl-benzene 88-40-4 Anisole, 2-tert-butyl-5-methyl- 2-tert-Butyl-5-methylanisole AI3-02456 Benzene, 1-(1,1-dimethylethyl)-2-methoxy-4-methyl- EINECS 201-827-1 ST5448545
CC(C)(C)c1c(c(C)c(c(C)c1N(=O)=O)N(=O)=O)N(=O)=O	1-tert-butyl-3,5-dimethyl-2,4,6-trinitrobenzene	1-tert-butyl-3,5-dimethyl-2,4,6-trinitrobenzene 1-tert-butyl-3,5-dimethyl-2,4,6-trinitro-benzene 81-15-2 46383_RIEDEL Musk xylene solution 1-(1,1-Dimethylethyl)-3,5-dimethyl-2,4,6-trinitrobenzene 2,4,6-Trinitro-3,5-dimethyl-1-tert-butylbenzene 4-05-00-01132 (Beilstein Handbook Reference) 5-tert-Butyl-2,4,6-trinitro-m-xylene 5-tert-Butyl-2,4,6-trinitro-m-xylene or musk xylene [UN2956] [Flammable s…	81-15-2
OCCNc1cc2OCOc2cc1	2-(1,3-benzodioxol-5-ylamino)ethanol	2-(1,3-benzodioxol-5-ylamino)ethanol
CC(C1OCCO1)c1ccccc1	2-(1-Phenylethyl)-1,3-dioxolane	2-(1-Phenylethyl)-1,3-dioxolane 4362-22-5 STOCK1S-03301 NSC 39437 1,3-Dioxolane, 2-(alpha-methylbenzyl)- AI3-31829 EINECS 224-449-9 1,3-Dioxolane, 2-(.alpha.-methylbenzyl)- 1,3-Dioxolane, 2-(1-phenylethyl)- NSC39437
CC(C)(C)C(=O)OCCOC(=O)C(C)(C)C	2-(2,2-dimethylpropanoyloxy)ethyl 2,2-dimethylpropanoate	2-(2,2-dimethylpropanoyloxy)ethyl 2,2-dimethylpropanoate 2,2-dimethylpropanoic acid 2-(2,2-dimethyl-1-oxopropoxy)ethyl ester 2,2-dimethylpropionic acid 2-pivaloyloxyethyl ester 20267-20-3 EINECS 243-660-7 Ethylene dipivalate Ethylene glycol, o,o-di(pivaloyl)-	20267-20-3
Nc1cc(N)c(cc1)OCCO	2-(2,4-diaminophenoxy)ethanol	2-(2,4-diaminophenoxy)ethanol 70643-20-8 2,4-Diaminophenoxyethanol 2-(2',4'-Diaminophenoxy)ethanol Ethanol, 2-(2,4-diaminophenoxy)-
Nc1cc(CCO)c(N)cc1		2-(2,5-diaminophenyl)ethanol
NC(=O)CSCC(N)=O	2-(2-amino-2-oxoethyl)sulfanylacetamide	2-(2-amino-2-oxoethyl)sulfanylacetamide 2-(2-amino-2-oxo-ethyl)sulfanylacetamide 2-[(2-amino-2-oxoethyl)thio]acetamide 2-[(2-amino-2-keto-ethyl)thio]acetamide 2-(2-amino-2-oxo-ethyl)sulfanylethanamide 14618-65-6 2,2'-Thiobis(acetamide) Acetamide, 2,2'-thiobis- NSC82327 WLN: ZV1S1VZ 2,2'-Thio-bis-acetamide 2,2'-Thiobisacetamide 4-03-00-00625 (Beilstein Handbook Reference) BRN 1764428 EINECS 238-65…	14618-65-6
NCCOCCO	2-(2-Aminoethoxy)ethanol	2-(2-Aminoethoxy)ethanol 929-06-6 06659_FLUKA Diethylene glycolamine 2-(2-Aminoethoxy)ethanol [UN3055] [Corrosive] 4-04-00-01412 (Beilstein Handbook Reference) 5-Aminoethyl 2-hydroxyethyl ether 5-Hydroxy-3-oxapentylamine BRN 0906728 EINECS 213-195-4 HSDB 5770 NSC 86108 UN3055 beta-(beta-Hydroxyethoxy)ethylamine beta-Hydroxy-beta'-aminodiethyl ether beta-Hydroxy-beta'-aminoethyl ether .beta.-(.bet…	929-06-6
CC(N)C(=O)NC(CCC(O)=O)C(O)=O	2-(2-aminopropanoylamino)pentanedioic acid	2-(2-aminopropanoylamino)pentanedioic acid 2-[(2-amino-1-oxopropyl)amino]pentanedioic acid 2-(alanylamino)glutaric acid L-ALA-GAMMA-D-GLU
CCCCOCCOCC(O)=O	2-(2-butoxyethoxy)acetic acid	2-(2-butoxyethoxy)acetic acid 2-(2-butoxyethoxy)ethanoic acid
CCCCOCCOCCO	2-(2-Butoxyethoxy)ethanol	2-(2-Butoxyethoxy)ethanol 112-34-5 210818-08-9 32250_FLUKA 4-01-00-02394 (Beilstein Handbook Reference) AI3-01954 BRN 1739225 BUCB Butoxy diethylene glycol Butoxydiethylene glycol Butoxydiglycol Butoxyethoxyethanol Butyl Ethyl Cellosolve Butyl carbitol Butyl diglycol Butyl digol Butyl dioxitol CCRIS 5321 Caswell No. 121B Caswell No. 125H DIETHYLENE GLYCOL MONOBUTYL ETHER Diethylene glycol butyl e…	112-34-5 210818-08-9
CCCCOCCOCCOC(C)=O	2-(2-Butoxyethoxy)ethyl acetate	2-(2-Butoxyethoxy)ethyl acetate Acetic acid 2-(2-butoxyethoxy)ethyl ester 2-(2-butoxyethoxy)ethyl ethanoate 124-17-4 98100-70-0 Ektasolve DB acetate InChI=1/C10H20O4/c1-3-4-5-12-6-7-13-8-9-14-10(2)11/h3-9H2,1-2H 537535_SIAL HSDB 334 2-(2-Butoxyethoxy) ethyl acetate 32260_FLUKA Butyldiglycol acetate NSC 5175 NSC6570 Glycol ether DB aceatate 2-(2-Butoxyethoxy)ethylester kyseliny octove [Czech] AI3-…	124-17-4 98100-70-0
CCOCCOCCOC(C)=O	2-(2-Ethoxyethoxy)ethyl acetate	2-(2-Ethoxyethoxy)ethyl acetate Acetic acid 2-(2-ethoxyethoxy)ethyl ester 2-(2-ethoxyethoxy)ethyl ethanoate 112-15-2 537527_ALDRICH DE Acetate 32240_FLUKA Ethyldiglycol acetate Diethylene glycol ethyl ether acetate Diethylene glycol monoethyl ether acetate Diglycol monoethyl ether acetate Ethanol, 2-(2-ethoxyethoxy)-, acetate InChI=1/C8H16O4/c1-3-10-4-5-11-6-7-12-8(2)9/h3-7H2,1-2H NSC8702 WLN: 2O…	112-15-2
Oc1c(cc(cc1NCCO)N(=O)=O)N(=O)=O	2-(2-hydroxyethylamino)-4,6-dinitrophenol	2-(2-hydroxyethylamino)-4,6-dinitrophenol 2-(2-hydroxyethylamino)-4,6-dinitro-phenol 2-(2-Hidroxi-3,5-dinitroanilino)etanol [Portuguese] 2-(2-Hidroxi-3,5-dinitroanilino)etanol [Spanish] 2-(2-Hydroxy-3,5-dinitroanilino)ethanol 2-(2-Hydroxy-3,5-dinitroanilino)ethanol [Danish] 2-(2-Hydroxy-3,5-dinitroanilino)ethanol [Dutch] 2-(2-Hydroxy-3,5-dinitroanilino)ethanol [French] 2-(2-Hydroxy-3,5-dinitroani…
CC(=C)C(=O)OCCOCCOC	2-(2-methoxyethoxy)ethyl 2-methylprop-2-enoate	2-(2-methoxyethoxy)ethyl 2-methylprop-2-enoate 2-methylprop-2-enoic acid 2-(2-methoxyethoxy)ethyl ester 2-methylacrylic acid 2-(2-methoxyethoxy)ethyl ester 113055-02-0 45103-58-0 61412-60-0 2-(2-Methoxyethoxy)ethyl methacrylate 2-Propenoic acid, 2-methyl-, 2-(2-methoxyethoxy)ethyl ester EINECS 256-190-2 2-Propenoic acid, 2-methyl-, 2-(2-methoxyethoxy)ethyl ester, homopolymer 447927_ALDRICH Di(eth…	113055-02-0 45103-58-0 61412-60-0
Cc1ccccc1CCO		2-(2-Methylphenyl)ethanol 19819-98-8 NCIOpen2_003816 AI3-07014 ZINC01602329 InChI=1/C9H12O/c1-8-4-2-3-5-9(8)6-7-10/h2-5,10H,6-7H2,1H 188123_ALDRICH 2-Methylphenethyl alcohol EINECS 243-349-6 NSC 409882 2-o-Tolylethanol Benzeneethanol, 2-methyl- NSC409882 Phenethyl alcohol, o-methyl- o-Methylphenethyl alcohol	19819-98-8
CC(=C)C(=O)OCCOC(=O)C(C)=C		2-(2-methylprop-2-enoyloxy)ethyl 2-methylprop-2-enoate 2-methylprop-2-enoic acid 2-(2-methyl-1-oxoprop-2-enoxy)ethyl ester 2-methylacrylic acid 2-methacryloyloxyethyl ester 156168-97-7 156932-37-5 170006-96-9 216753-70-7 25852-47-5 62886-53-7 73212-53-0 92308-31-1 12738-39-5 25721-76-0 37311-07-2 108772-05-0 121266-93-1 121978-90-3 130865-23-5 135623-36-8 138454-60-1 138533-09-2 154855-14-8 15694…	156168-97-7 156932-37-5 170006-96-9 216753-70-7 25852-47-5 62886-53-7 73212-53-0 92308-31-1 12738-39-5 25721-76-0 37311-07-2 108772-05-0 121266-93-1 121978-90-3 130865-23-5 135623-36-8 138454-60-1 138533-09-2 154855-14-8 156940-26-0 205501-13-9 37211-46-4 51026-92-7 56480-56-9 81897-47-4 97-90-5 141104-76-9
CC(=C)C(=O)OCCOP([O-])(=O)OCC[N+](C)(C)C	2-(2-methylprop-2-enoyloxy)ethyl 2-trimethylazaniumylethyl phosphate	2-(2-methylprop-2-enoyloxy)ethyl 2-trimethylazaniumylethyl phosphate 2-(2-methylprop-2-enoyloxy)ethyl 2-trimethylammonioethyl phosphate 2-(2-methyl-1-oxoprop-2-enoxy)ethyl 2-trimethylammonioethyl phosphate 2-methacryloyloxyethyl 2-trimethylammonioethyl phosphate 67881-98-5 2-Methacryloyloxyethyl phosphorylcholine 2-Moep Ethanaminium, 2-((hydroxy(2-((2-methyl-1-oxo-2-propenyl)oxy)ethoxy)phosphinyl…
NC(=O)CN1CCCC1=O		2-(2-oxopyrrolidin-1-yl)acetamide 2-(2-oxo-1-pyrrolidinyl)acetamide 2-(2-ketopyrrolidin-1-yl)acetamide 2-(2-oxopyrrolidin-1-yl)ethanamide 7491-74-9 BSPBio_000553 D01914 Myocalm Myocalm (TN) Piracetam (JAN/USAN) Prestwick2_000537 KBio2_007037 Spectrum3_001523 SMR000058196 KBioSS_001901 Prestwick_870 Spectrum4_000742 Spectrum2_001074 KBioGR_001064 ZINC03812874 SPBio_002474 BPBio1_000609 MLS00006971…	7491-74-9
O=CCOCCc1ccccc1	2-(2-phenylethoxy)acetaldehyde	2-(2-phenylethoxy)acetaldehyde 2-(2-phenylethoxy)ethanal 41847-88-5 (2-Phenylethoxy)acetaldehyde AI3-36127 Acetaldehyde, (2-phenylethoxy)- EINECS 255-565-8 Phenylethyl oxy-acetaldehyde Phenylethyloxy acetaldehyde	41847-88-5
CC(CCC=C(C)C)CCOCC=O	2-(3,7-dimethyloct-6-enoxy)acetaldehyde	2-(3,7-dimethyloct-6-enoxy)acetaldehyde 2-(3,7-dimethyloct-6-enoxy)ethanal 7492-67-3 ((3,7-Dimethyl-6-octenyl)oxy)acetaldehyde 2-01-00-00864 (Beilstein Handbook Reference) 6,10-Dimethyl-3-oxa-9-undecenal AI3-36126 Acetaldehyde, ((3,7-dimethyl-6-octenyl)oxy)- BRN 1767678 EINECS 231-324-2 FEMA No. 2310 Acetaldehyde, [(3,7-dimethyl-6-octenyl)oxy]- Citronelloxyacetaldehyde Citronellyloxyacetaldehyde …	7492-67-3
CNc1cc(ccc1N(=O)=O)OCCO	2-(3-methylamino-4-nitrophenoxy)ethanol	2-(3-methylamino-4-nitrophenoxy)ethanol 2-(3-methylamino-4-nitro-phenoxy)ethanol 59820-63-2 2-(3-(Methylamino)-4-nitrophenoxy)ethanol 3-Methylamino-4-nitrophenoxyethanol EINECS 261-940-7 Ethanol, 2-(3-(methylamino)-4-nitrophenoxy)- 2-(3-(Methylamino)-4-nitrophenoxy) ethanol	59820-63-2
CC(C)CCOCCc1ccccc1	2-(3-methylbutoxy)ethylbenzene	2-(3-methylbutoxy)ethylbenzene 2-isopentyloxyethylbenzene 2-isoamoxyethylbenzene 54173-86-3 56011-02-0 2-Phenylethyl isopentyl ether Anther BRN 2250579 Benzene, (2-(3-methylbutoxy)ethyl)- EINECS 259-943-3 Isoamyl phenylethyl ether Isopentyl phenethyl ether Phenylethyl isoamyl ether (2-(3-Methylbutoxy)ethyl)benzene
CC(C)c1cccc(CC=O)c1		2-(3-propan-2-ylphenyl)acetaldehyde 2-(3-isopropylphenyl)acetaldehyde 2-(3-propan-2-ylphenyl)ethanal 1335-44-0 Acetaldehyde, cumenyl- Benzeneacetaldehyde, ar-(1-methylethyl)- EINECS 215-634-5 ar-Isopropylphenylacetaldehyde	1335-44-0
OCCN1CCN=C1	2-(4,5-dihydroimidazol-1-yl)ethanol	2-(4,5-dihydroimidazol-1-yl)ethanol 61791-38-6 1H-Imidazole-1-ethanol, 4,5-dihydro-, 2-norcoco alkyl derivs. 1H-Imidazole-1-ethanol, 4,5-dihydro-2-norcocoyl- Coco fatty acids, condensate with aminoethylethanolamine Coconut fatty acid, aminoethylethanolamine imidazoline Cocoyl hydroxyethyl imidazoline Cocoyl imidazoline EINECS 263-170-7 1-(2-Hydroxyethyl)-2-coco-2-imidazoline 1-(2-Hydroxyethyl)-2-…	61791-38-6
C=CCc1cc(-c2cc(CC=C)c(O)cc2)c(O)cc1		2-(4-hydroxy-3-prop-2-enylphenyl)-4-prop-2-enylphenol 4-allyl-2-(3-allyl-4-hydroxy-phenyl)phenol 4-allyl-2-(3-allyl-4-hydroxyphenyl)phenol 2-(4-hydroxy-3-prop-2-enyl-phenyl)-4-prop-2-enyl-phenol 35354-74-6 564-73-8 3,5'-Diallyl-4,2'-dihydroxybiphenyl NSC 293100 H4914_SIGMA MLS001048916 SMR000387107 {1,1'-Biphenyl]-2,4'-diol, 3,5-di-2-propenyl- AIDS002243 AIDS-002243 MLS000759481 SMP2_000040 BB_NC…	35354-74-6 564-73-8
Cc1ccc(CC=O)cc1		2-(4-methylphenyl)acetaldehyde 2-(4-methylphenyl)ethanal 104-09-6 Methylphenylacetaldehyde, p- p-Tolylacetaldehyde (4-Methylphenyl)acetaldehyde 4-Methylbenzeneacetaldehyde Acetaldehyde, p-tolyl- BENZENEACETALDEHYDE, 4-METHYL- EINECS 203-173-2 FEMA No. 3071
CC(C)c1ccc(CC=O)cc1	2-(4-propan-2-ylphenyl)acetaldehyde	2-(4-propan-2-ylphenyl)acetaldehyde 2-(4-isopropylphenyl)acetaldehyde 2-(4-propan-2-ylphenyl)ethanal 4395-92-0 4-(1-Methylethyl)benzeneacetaldehyde 4-07-00-00747 (Beilstein Handbook Reference) 4-ISOPROPYLPHENYLACETALDEHYDE 4-Isopropyl phenylacetaldehyde Acetaldehyde, (p-isopropylphenyl)- BRN 2246668 Benzeneacetaldehyde, 4-(1-methylethyl)- Cortexal Cuminic acetaldehyde Cumyl acetaldehyde Cumylacet…	4395-92-0
CC(C)(C)c1ccc(CC#N)cc1		2-(4-tert-butylphenyl)acetonitrile 2-(4-tert-butylphenyl)ethanenitrile 3288-99-1 Acetonitrile, (p-tert-butylphenyl)- Benzeneacetonitrile, 4-(1,1-dimethylethyl)- NSC85354 p-tert-Butylbenzeneacetontrile ZINC01760302 (4-tert-Butylphenyl)acetonitrile EINECS 221-944-1 NSC 85354 p-tert-Butylbenzylcyanide	3288-99-1
COc1cc2ccc(cc2cc1)C(C)C(O)=O		2-(6-methoxynaphthalen-2-yl)propanoic acid 2-(6-methoxy-2-naphthyl)propanoic acid 2-(6-Methoxy-2-naphthyl)propionic acid 26159-31-9 22204-53-1 23981-80-8 EINECS 245-969-2 D00118 ST024763 EINECS 247-485-7 Prestwick3_000045 Oprea1_018821 Naprosyn (TN) Naproxen (JP15/USP/INN) (1)-2-(6-Methoxy-2-naphthyl)propionic acid NCGC00094733-01 NCGC00094733-02 C01517 Naproxen BSPBio_000169 2-Naphthaleneacetic …	26159-31-9 22204-53-1 23981-80-8
CCCCN(CCO)CCO	2-(butyl-(2-hydroxyethyl)amino)ethanol	2-(butyl-(2-hydroxyethyl)amino)ethanol 102-79-4 2,2'-Butyliminodiethanol 2-(N-Butyl-N-2-hydroxyethylamino)ethanol 4-04-00-01520 (Beilstein Handbook Reference) BRN 1739642 Bis(beta-hydroxyethyl)butylamine EINECS 203-055-0 N,N'-ETHANOLBUTYLIMINE NSC 60214 2,2'-(Butylimino)diethanol 2,2-(Butylimino)diethanol BIDE Butylbis(2-hydroxyethyl)amine Butyldiethanolamine Ethanol, 2,2'-(butylimino)bis- Ethano…	102-79-4
OC(=O)CSSCC(O)=O	2-(carboxymethyldisulfanyl)acetic acid	2-(carboxymethyldisulfanyl)acetic acid 2-(carboxymethyldisulfanyl)ethanoic acid 505-73-7 NCIStruc1_000215 NCI54088 NCGC00013664 AIDS021299 NCIStruc2_000205 Dithiodiacetic acid 2,2'-Dithiobisacetic acid 2,2'-Dithiodi(acetic) acid Acetic acid, dithiodi- (8CI) EINECS 208-019-8 Dithiodiglycollic acid NSC-54088 2,2&#8242;-Dithiodiacetic acid D5392_SIGMA AIDS-021299 2,2'-Dithiodiacetic acid Acetic acid…	505-73-7
CCCCCCCCCC[N+](C)(C)CC([O-])=O	2-(decyl-dimethylazaniumyl)acetate	2-(decyl-dimethylazaniumyl)acetate 2-(decyl-dimethyl-ammonio)acetate 2-(decyl-dimethylammonio)acetate 2-(decyl-dimethyl-azaniumyl)ethanoate 2644-45-3 (Carboxymethyl)decyldimethylammonium hydroxide 1-Decanaminium, N-(carboxymethyl)-N,N-dimethyl-, hydroxide, inner salt 1-Decanaminium, N-(carboxymethyl)-N,N-dimethyl-, inner salt Ammonium, (carboxymethyl)decyldimethyl-, hydroxide, inner salt Capryldi…	2644-45-3
FC(F)OCC(F)(C(F)(F)F)C(F)(F)F	2-(difluoromethoxymethyl)-1,1,1,2,3,3,3-heptafluoropropane	2-(difluoromethoxymethyl)-1,1,1,2,3,3,3-heptafluoropropane 2-(difluoromethoxymethyl)-1,1,1,2,3,3,3-heptafluoro-propane 163702-08-7 Propane, 2-(difluoromethoxymethyl)-1,1,1,2,3,3,3-heptafluoro-	163702-08-7
CCCCCCCCCCCCCC[N+](C)(C)CC([O-])=O		2-(dimethyl-tetradecylazaniumyl)acetate 2-(dimethyl-tetradecyl-ammonio)acetate 2-(dimethyl-tetradecylammonio)acetate 2-(dimethyl-myristyl-ammonio)acetate 2-(dimethyl-tetradecyl-azaniumyl)ethanoate 2601-33-4 41117-57-1 Myristyl dimethyl betaine Myristyl dimethyl glycine N-(Carboxymethyl)-N,N-dimethyl-1-tetradecanaminium hydroxide, inner salt (Carboxylatomethyl)dimethyltetradecylammonium 1-Tetradec…
CCCCCCCCCCCC[N+](C)(C)CC([O-])=O		2-(dodecyl-dimethylazaniumyl)acetate 2-(dodecyl-dimethyl-ammonio)acetate 2-(dodecyl-dimethylammonio)acetate 2-(lauryl-dimethyl-ammonio)acetate 2-(dodecyl-dimethyl-azaniumyl)ethanoate D9G EMPIGEN BB&#174; detergent N-(Alkyl C10-C16)-N,N-dimethylglycine betaine N,N-Dimethyl-N-dodecylglycine betaine N-DODECYL-N,N-DIMETHYLGLYCINATE 45165_FLUKA
OCOCCOCO	2-(hydroxymethoxy)ethoxymethanol	2-(hydroxymethoxy)ethoxymethanol 2-methyloloxyethoxymethanol 3586-55-8 (1,2-Ethanediylbis(oxy))bismethanol (Ethylenedioxy)dimethanol EINECS 222-720-6 Ethylene glycol bis(semiformal) Methanol, (1,2-ethanediylbis(oxy))bis-	3586-55-8
CC(C)C(=O)OCCOc1ccccc1		2-(phenoxy)ethyl 2-methylpropanoate 2-methylpropanoic acid 2-(phenoxy)ethyl ester 2-methylpropionic acid 2-(phenoxy)ethyl ester 103-60-6 NSC227210 Ethylene glycol monophenylether isobutyrate Phenoxyethyl isobutyrate NSC406209 AI3-02711 W287318_ALDRICH ST5410666 Isobutyric acid, 2-phenoxyethyl ester 2-Phenoxyethyl 2-methylpropanoate 2-Phenoxyethyl isobutyrate Propanoic acid, 2-methyl-, 2-phenoxyet…	103-60-6
CCC(=O)OCCOc1ccccc1	2-(phenoxy)ethyl propanoate	2-(phenoxy)ethyl propanoate propanoic acid 2-(phenoxy)ethyl ester propionic acid 2-(phenoxy)ethyl ester 23495-12-7 W514802_ALDRICH BRN 2214059 2-Phenoxyethyl propionate Ethanol, 2-phenoxy-, propanoate Ethanol, 2-phenoxy-, propionate Ethyleneglycol monophenyl ether propionate NSC6707 Phenoxyethyl propionate Propionic acid, 2-phenoxyethyl ester WLN: 2VO2OR NSC 6707 2-Phenoxyethanol propionate ZINC0…	23495-12-7
OCCOCc1ccccc1	2-(phenylmethoxy)ethanol	2-(phenylmethoxy)ethanol 2-(Benzyloxy)ethanol 622-08-2 2-(BENZYLOXY) ETHANOL 2-Benzyloxyethanol 4-06-00-02241 (Beilstein Handbook Reference) AI3-01040 BRN 2043566 Benzyl cellosolve Benzylcelosolv [Czech] EINECS 210-719-3 HSDB 2104 NSC 8886 ZINC01648307 InChI=1/C9H12O2/c10-6-7-11-8-9-4-2-1-3-5-9/h1-5,10H,6-8H Benzyl "cellosolve" Ethanol, 2-(benzyloxy)- Ethanol, 2-(phenylmethoxy)- Ethylene glycol m…	622-08-2
OC1COC(Cc2ccccc2)OC1	2-(phenylmethyl)-1,3-dioxan-5-ol	2-(phenylmethyl)-1,3-dioxan-5-ol 2-(benzyl)-1,3-dioxan-5-ol 4740-79-8 1,3-Dioxan-5-ol, 2-(phenylmethyl)- 2-Benzyl-1,3-dioxan-5-ol 5-Hydroxy-2-benzyl-1,3-dioxane EINECS 225-249-4
CCC(C)(NC(=O)C=C)S(O)(=O)=O	2-(prop-2-enoylamino)butane-2-sulfonic acid	2-(prop-2-enoylamino)butane-2-sulfonic acid 2-(1-oxoprop-2-enylamino)butane-2-sulfonic acid 2-acrylamidobutane-2-sulfonic acid
OC(=O)C(Cl)(Cl)Cl	2,2,2-trichloroacetic acid hydron; 2,2,2-trichloroacetate	2,2,2-trichloroacetic acid 2,2,2-trichloroethanoic acid 76-03-9 36789_RIEDEL NCIOpen2_000772 30566_FLUKA PS34_SUPELCO 27242_RIEDEL T0324_SIAL 4-02-00-00508 (Beilstein Handbook Reference) AI3-24157 Acide trichloracetique [French] Acido tricloroacetico [Italian] BRN 0970119 CCRIS 4015 Caswell No. 870 EINECS 200-927-2 EPA Pesticide Chemical Code 081002 HSDB 1779 Konesta Kyselina trichloroctova [Czec…	76-03-9
CC(=C)C(=O)OCC(F)(F)F		2,2,2-trifluoroethyl 2-methylprop-2-enoate 2-methylprop-2-enoic acid 2,2,2-trifluoroethyl ester 2-methylacrylic acid 2,2,2-trifluoroethyl ester 352-87-4 54802-79-8 2,2,2-Trifluoroethyl methacrylate 2-Propenoic acid, 2-methyl-, 2,2,2-trifluoroethyl ester Methacrylic acid, 2,2,2-trifluoroethyl ester NSC32617 Trifluoroethyl methacrylate 373761_ALDRICH 2-Propenoic acid, 2-methyl-, 2,2,2-trifluoroethy…
O=C(Nc1ccccc1)C(F)(F)F	2,2,2-Trifluoro-N-phenylacetamide	2,2,2-Trifluoro-N-phenylacetamide 2,2,2-trifluoro-N-phenyl-acetamide 2,2,2-trifluoro-N-phenyl-ethanamide 404-24-0 2,2,2-Trifluoroacetanilide Acetamide, 2,2,2-trifluoro-N-phenyl- Acetanilide, 2,2,2-trifluoro- NSC9474 ChemDiv3_000689 alpha,alpha,alpha-Trifluoroacetanilide alpha, alpha, alpha-Trifluoroacetanilide ZINC00170161 AIDS019074 SBB017011 Trifluoroacetanilide NSC 9474 AIDS-019074 Acetamide, …	404-24-0
CC(=C)C(=O)OCC(F)(F)C(F)(F)C(F)(F)C(F)F		2,2,3,3,4,4,5,5-octafluoropentyl 2-methylprop-2-enoate 2-methylprop-2-enoic acid 2,2,3,3,4,4,5,5-octafluoropentyl ester 2-methylacrylic acid 2,2,3,3,4,4,5,5-octafluoropentyl ester 355-93-1 30998-06-2 470988_ALDRICH 2,2,3,3,4,4,5,5-Octafluoropentyl methacrylate EINECS 206-596-0 1H,1H,5H-Octafluoropentyl methacrylate 2-Propenoic acid, 2-methyl-, 2,2,3,3,4,4,5,5-octafluoropentyl ester 2-Propenoic ac…
CC(C)(C)CC(C)(C)CC(C)(C)CC(C)(C)CC(C)(C)CC(C)(C)CC(C)(C)CC(C)(C)C		2,2,4,4,6,6,8,8,10,10,12,12,14,14,16,16-hexadecamethylheptadecane 61693-08-1 Heptadecane, 2,2,4,4,6,6,8,8,10,10,12,12,14,14,16,16-hexadecamethyl-
C[Si]1(C)O[Si](C)(C)O[Si](C)(C)O[Si](C)(C)O[Si](C)(C)O[Si](C)(C)O1	2,2,4,4,6,6,8,8,10,10,12,12-dodecamethyl-1,3,5,7,9,11-hexaoxa-2,4,6,8,10,12-hexasilacyclododecane	2,2,4,4,6,6,8,8,10,10,12,12-dodecamethyl-1,3,5,7,9,11-hexaoxa-2,4,6,8,10,12-hexasilacyclododecane 540-97-6 Cyclohexasiloxane, dodecamethyl- DODECAMETHYLCYCLOHEXASILOXANE EINECS 208-762-8
C[Si]1(C)O[Si](C)(C)O[Si](C)(C)O[Si](C)(C)O[Si](C)(C)O1	2,2,4,4,6,6,8,8,10,10-decamethyl-1,3,5,7,9,2,4,6,8,10-pentaoxapentasilecane	2,2,4,4,6,6,8,8,10,10-decamethyl-1,3,5,7,9,2,4,6,8,10-pentaoxapentasilecane 541-02-6 4-04-00-04128 (Beilstein Handbook Reference) BRN 1800166 CCRIS 1328 NCGC00163981-01 Cyclopentasiloxane, decamethyl- DECAMETHYLCYCLOPENTASILOXANE Dekamethylcyklopentasiloxan [Czech] Dimethylsiloxane pentamer Dow corning 345 Dow corning 345 fluid EINECS 208-764-9 HSDB 5683 KF 995 NUC silicone VS 7158 SF 1202 Silico…	541-02-6
C[Si]1(C)O[Si](C)(C)O[Si](C)(C)O1	2,2,4,4,6,6-hexamethyl-1,3,5,2,4,6-trioxatrisilinane	2,2,4,4,6,6-hexamethyl-1,3,5,2,4,6-trioxatrisilinane 541-05-9 AI3-62005 CCRIS 1326 Cyclotrisiloxane, hexamethyl- DC 246 Dimethylsiloxane cyclic trimer EINECS 208-765-4 HEXAMETHYLCYCLOTRISILOXANE LS 8120 SDK 10 235687_ALDRICH NCGC00164098-01 302902_ALDRICH	541-05-9
CC(CC(C)(C)C)CC(C)(C)C	2,2,4,6,6-PENTAMETHYLHEPTANE	2,2,4,6,6-PENTAMETHYLHEPTANE 13475-82-6 06753_FLUKA EINECS 236-757-0 Heptane, 2,2,4,6,6-pentamethyl-	13475-82-6
CC(C)CC(C)(C)C	2,2,4-Trimethylpentane	2,2,4-Trimethylpentane 31921-36-5 540-84-1 34862_SIAL 34499_RIEDEL 59045_FLUKA 360066_ALDRICH BRN 1696876 32291_RIEDEL 360597_SIAL 155012_SIAL InChI=1/C8H18/c1-7(2)6-8(3,4)5/h7H,6H2,1-5H 59030_FLUKA 650439_ALDRICH 2,4,4-Trimethylpentane 4-01-00-00439 (Beilstein Handbook Reference) AI3-23976 c1078 EINECS 208-759-1 HSDB 5682 ISO-OCTANE NSC 39117 Isobutyltrimethylmethane Isooctane NSC39117 Pentane, …	31921-36-5 540-84-1
CC(C)CCOC(Cc1ccccc1)OCCC(C)C	2,2-bis(3-methylbutoxy)ethylbenzene	2,2-bis(3-methylbutoxy)ethylbenzene 2,2-diisopentyloxyethylbenzene 2,2-diisoamoxyethylbenzene 68555-28-2 (2,2-Bis(3-methylbutoxy)ethyl)benzene Benzene, (2,2-bis(3-methylbutoxy)ethyl)- EINECS 271-419-6 Phenylacetaldehyde diisoamylacetal	68555-28-2
NC(=O)C(Br)(Br)C#N	2,2-DIBROMO-2-CYANOACETAMIDE	2,2-DIBROMO-2-CYANOACETAMIDE 2,2-dibromo-2-cyano-acetamide 2,2-dibromo-2-cyano-ethanamide 10222-01-2 EPA Pesticide Chemical Code 101801 HSDB 6982 NSC 98283 XD 7287L XD-1603 XD-7287l Antimicrobial 540978_ALDRICH Dibromocyano acetic acid amide ZINC01638458 FR-2220 NCIOpen2_006184 NSC98283 NCGC00164203-01 SBB008529 2,2-Dibromo-2-carbamoylacetonitrile 2,2-Dibromo-3-nitrilopropionamide 3-02-00-01641 (…	10222-01-2
COC(Cc1ccccc1)OC	2,2-dimethoxyethylbenzene	2,2-dimethoxyethylbenzene 101-48-4 77811_FLUKA ZINC00391851 .alpha.-Tolylaldehyde dimethyl acetal Acetaldehyde, phenyl-, dimethyl acetal Benzene, (2,2-dimethoxyethyl)- Ethane, 1,1-dimethoxy-2-phenyl- Hyscylene P NSC5174 Phenacetaldehyde dimethyl acetal Phenylacetaldehyde dimethyl acetal Phenylacetic aldehyde dimethyl acetal Viridine WLN: 1OYO1 & 1R W287601_ALDRICH (2,2-Dimethoxyethyl)benzene 1,1-…	101-48-4
C[Si]1(C)Oc2ccccc2C(=O)O1		2,2-dimethyl-1,3,2-benzodioxasilin-4-one
CC(C)(Cc1ccccc1)C=O	2,2-dimethyl-3-phenylpropanal	2,2-dimethyl-3-phenylpropanal 2,2-dimethyl-3-phenyl-propanal 2,2-dimethyl-3-phenyl-propionaldehyde 1009-62-7 2,2-Dimethyl-3-phenylpropionaldehyde AI3-28154 Benzenepropanal, alpha,alpha-dimethyl- EINECS 213-771-5
COCCCNC(=O)C(O)C(O)C(O)C(O)CO		2,3,4,5,6-pentahydroxy-N-(3-methoxypropyl)hexanamide
CC(C=O)C(C)CC(C)(C)C	2,3,5,5-Tetramethylhexanal	2,3,5,5-Tetramethylhexanal 68391-29-7 Hexanal, 2,3,5,5-tetramethyl- EINECS 269-940-9	68391-29-7
CCC=CCC=CCC=CCCCCCCCC(=O)OC(COC(=O)CCCCCCCC=CCC=CCC=CCC)COC(=O)CCCCCCCC=CCC=CCC=CCC		2,3-bis[[(9E,12E,15E)-octadeca-9,12,15-trienoyl]oxy]propyl (9E,12E,15E)-octadeca-9,12,15-trienoate 2,3-di(octadeca-9,12,15-trienoyloxy)propyl octadeca-9,12,15-trienoate octadeca-9,12,15-trienoic acid 2,3-bis(1-oxooctadeca-9,12,15-trienoxy)propyl ester (9E,12E,15E)-octadeca-9,12,15-trienoic acid 2,3-bis[(9E,12E,15E)-1-oxooctadeca-9,12,15-trienoxy]propyl ester octadeca-9,12,15-trienoic acid 2,3-di(…
CCCCCC=CCC=CCC=CCC=CCCCC(=O)OCC(O)CO	2,3-dihydroxypropyl (5E,8E,11E,14E)-icosa-5,8,11,14-tetraenoate	2,3-dihydroxypropyl (5E,8E,11E,14E)-icosa-5,8,11,14-tetraenoate (5E,8E,11E,14E)-icosa-5,8,11,14-tetraenoic acid 2,3-dihydroxypropyl ester (5E,8E,11E,14E)-icosa-5,8,11,14-tetraenoic acid glyceryl ester
CCC=CCC=CCC=CCCCCCCCC(=O)OCC(O)CO		2,3-dihydroxypropyl (9E,12E,15E)-octadeca-9,12,15-trienoate 2,3-dihydroxypropyl octadeca-9,12,15-trienoate (9E,12E,15E)-octadeca-9,12,15-trienoic acid 2,3-dihydroxypropyl ester octadeca-9,12,15-trienoic acid 2,3-dihydroxypropyl ester octadeca-9,12,15-trienoic acid glyceryl ester (9E,12E,15E)-octadeca-9,12,15-trienoic acid glyceryl ester 75685-85-7 1-Monolinolenoyl-rac-glycerol 2,3-Dihydroxypropyl…
CC(=C)C(=O)OCC(O)CO		2,3-dihydroxypropyl 2-methylprop-2-enoate 2-methylprop-2-enoic acid 2,3-dihydroxypropyl ester 2-methylacrylic acid glyceryl ester 5919-74-4 201594-54-9 205515-17-9 28474-30-8 96614-21-0 2,3-Dihydroxypropyl methacrylate 2-Methyl-2-propenoic acid, 2,3-dihydroxypropyl ester 2-Propenoic acid, 2-methyl-, 2,3-dihydroxypropyl ester EINECS 227-642-6 Glyceryl methacrylate Polyglycerylmethacrylate 2-Propen…
OCC(O)COC(=O)CS	2,3-dihydroxypropyl 2-sulfanylacetate	2,3-dihydroxypropyl 2-sulfanylacetate 2-mercaptoacetic acid 2,3-dihydroxypropyl ester 2-mercaptoacetic acid glyceryl ester 2,3-dihydroxypropyl 2-sulfanylethanoate 30618-84-9 Acetic acid, mercapto-, monoester with 1,2,3-propanetriol Acetic acid, mercapto-, monoester with glycerol EINECS 250-264-8 Glycerol monomercaptoacetate Glyceryl monothioglycolate Glyceryl thioglycolate Mercaptoacetic acid, mo…
C[N+](C)(C)CCOP([O-])(=O)OCC(O)CO		2,3-dihydroxypropyl 2-trimethylazaniumylethyl phosphate 2,3-dihydroxypropyl 2-trimethylammonioethyl phosphate glyceryl 2-trimethylammonioethyl phosphate 563-24-6 107208-73-1 Choline glycerophosphate Ethanaminium, 2-(((2,3-dihydroxypropoxy)hydroxyphosphinyl)oxy)-N,N,N-trimethyl-, inner salt GLYCERYLPHOSPHORYLCHOLINE	563-24-6 107208-73-1
OCC(O)COC(=O)CCS	2,3-dihydroxypropyl 3-sulfanylpropanoate	2,3-dihydroxypropyl 3-sulfanylpropanoate 3-mercaptopropanoic acid 2,3-dihydroxypropyl ester 3-mercaptopropionic acid glyceryl ester 67874-65-1 2,3-Dihydroxypropyl 3-mercaptopropionate 3-Mercaptopropanoic acid, glyceryl monoester EINECS 267-492-9 Propanoic acid, 3-mercapto-, 2,3-dihydroxypropyl ester	67874-65-1
CCCCCC=CCC=CCCCCCCCC(=O)OCC(O)CO	2,3-dihydroxypropyl octadeca-9,12-dienoate 2,3-dihydroxypropyl (9E,12E)-octadeca-9,12-dienoate	2,3-dihydroxypropyl octadeca-9,12-dienoate 2,3-dihydroxypropyl (9E,12E)-octadeca-9,12-dienoate octadeca-9,12-dienoic acid 2,3-dihydroxypropyl ester (9E,12E)-octadeca-9,12-dienoic acid 2,3-dihydroxypropyl ester (9E,12E)-octadeca-9,12-dienoic acid glyceryl ester octadeca-9,12-dienoic acid glyceryl ester
C[N+](C)(C)CC(O)CO		2,3-dihydroxypropyl-trimethylazanium 2,3-dihydroxypropyl-trimethyl-ammonium 2,3-dihydroxypropyl-trimethylammonium glyceryl-trimethyl-ammonium 2,3-dihydroxypropyl-trimethyl-azanium
CC(=C)CC(C)(C)C	2,4,4-Trimethylpent-1-ene	2,4,4-Trimethylpent-1-ene 12002-23-2 25167-70-8 107-39-1 92670_FLUKA 1-Methyl-1-neopentylethylene 2,4,4-Trimethyl-1-pentene 2,4,4-Trimethyl-2-pentene NCGC00166004-01 UN2050 2,4,4-TRIMETHYLPENTENE Diisobutylene, isomeric compounds [UN2050] [Flammable liquid] EINECS 246-690-9 Pentene, 2,4,4-trimethyl- NSC73942 4-01-00-00892 (Beilstein Handbook Reference) AI3-30049 BRN 1098309 1-Pentene, 2,4,4-trime…	12002-23-2 25167-70-8 107-39-1
C[Si]1(CCC(F)(F)F)O[Si](C)(CCC(F)(F)F)O[Si](C)(CCC(F)(F)F)O[Si](C)(CCC(F)(F)F)O1	2,4,6,8-tetramethyl-2,4,6,8-tetrakis(3,3,3-trifluoropropyl)-1,3,5,7,2,4,6,8-tetraoxatetrasilocane	2,4,6,8-tetramethyl-2,4,6,8-tetrakis(3,3,3-trifluoropropyl)-1,3,5,7,2,4,6,8-tetraoxatetrasilocane 429-67-4 2,4,6,8-Tetramethyl-2,4,6,8-tetrakis(3,3,3-trifluoropropyl)cyclotetrasiloxane Cyclotetrasiloxane, 2,4,6,8-tetramethyl-2,4,6,8-tetrakis(3,3,3-trifluoropropyl)- EINECS 207-060-9	429-67-4
CC(C)c1cc(ccc1C=O)C(C)C		2,4-di(propan-2-yl)benzaldehyde 2,4-Diisopropylbenzaldehyde 68459-95-0 2,4-Bis(isopropyl)benzaldehyde Benzaldehyde, 2,4-bis(1-methylethyl)- EINECS 270-621-1	68459-95-0
NC(=O)CC(N)C(O)=O	2,4-diamino-4-oxobutanoic acid 4-amino-2-azaniumyl-4-oxobutanoate	2,4-diamino-4-oxobutanoic acid 2,4-diamino-4-oxo-butanoic acid 2,4-diamino-4-keto-butyric acid 3130-87-8 70-47-3 7006-34-0 EINECS 218-163-3 2-amino-3-carbamoylpropanoic acid Asparagine D-form ()-2-Aminosuccinic acid 4-amide 11180_FLUKA DL-Asparagine monohydrate DL-Aspartic acid 4-amide CHEBI:22653 D(-)-Asparagine monohydrate Hasp ( -)-Asparagine DL-Aspartamine EINECS 221-521-1 NSC 206243 NSC 7891…	3130-87-8 70-47-3 7006-34-0
CC(C)(CO)C(O)C(=O)NCCCO	2,4-Dihydroxy-N-(3-hydroxypropyl)-3,3-dimethylbutanamide	2,4-Dihydroxy-N-(3-hydroxypropyl)-3,3-dimethylbutanamide 2,4-dihydroxy-N-(3-hydroxypropyl)-3,3-dimethyl-butanamide 2,4-dihydroxy-N-(3-hydroxypropyl)-3,3-dimethyl-butyramide 1113-70-8 17307-32-3 16485-10-2 62507-76-0 Butanamide, 2,4-dihydroxy-N-(3-hydroxypropyl)-3,3-dimethyl-, (2R)- Butanamide, 2,4-dihydroxy-N-(3-hydroxypropyl)-3,3-dimethyl-, (R)- Butanamide, 2,4-dihydroxy-N-(3-hydroxypropyl)-3,3-…	1113-70-8 17307-32-3 16485-10-2 62507-76-0
CC1(C)COC(C)(OC1)c1ccccc1	2,5,5-Trimethyl-2-phenyl-1,3-dioxane	2,5,5-Trimethyl-2-phenyl-1,3-dioxane 5406-58-6 m-Dioxane, 2,5,5-trimethyl-2-phenyl- 1,3-Dioxane, 2,5,5-trimethyl-2-phenyl- EINECS 226-466-7 NSC 7039 m-Dioxane, 2,5,5-trimethyl-2-phenyl- (8CI) NSC7039	5406-58-6
NC1C(=O)N=C(N)NC=1N		2,5,6-triamino-1H-pyrimidin-4-one 2,5,6-Triamino-4-pyrimidol AIDS-019723 AIDS019723 EINECS 213-725-4 NSC 9313 2,4,5-Triamino-6-oxypyrimidine 2,5,6-Triamino-4(1H)-pyrimidinone 2,5,6-Triaminopyrimidin-4-ol 2,4,5-Triamino-6-hydroxypyrimidine 2,4,5-Triamino-6-pyrimidinol 2,4,5-Triaminopyrimidin-6(1H)-one 2,5,6-Triamino-4-oxopyrimidine 2,5,6-Triamino-4-pyrimidinol 2,5,6-Triamino-4-pyrimidinone 4(1H)-P…
NC(=O)CCC(N)C(O)=O	2,5-diamino-5-oxopentanoic acid	2,5-diamino-5-oxopentanoic acid 2,5-diamino-5-oxo-pentanoic acid 2,5-diamino-5-keto-valeric acid 6899-04-3 585-21-7 Glutaminsaeure-5-amid Hgln AI3-32686 Glutamine DL-form Glutamine, DL- (8CI) NSC 97925 glutamic acid gamma-amide (+-)-Glutamine C00303 GLUTAMIDE .gamma.-Glutamine Cebrogen GLUTAMINE,L- Glutamic acid amide Glutamine, L- L-2-Aminoglutaramidic acid L-Glutamic acid .gamma.-amide L-Glutam…	6899-04-3 585-21-7
CC(CC(C)C)CC(=O)CC(C)C	2,6,8-Trimethylnonan-4-one	2,6,8-Trimethylnonan-4-one 123-18-2 Isobutyl heptyl ketone NSC66186 EINECS 204-607-3 NSC 66186 2,6,8-Trimethyl-4-nonanone 4-Nonanone, 2,6,8-trimethyl-	123-18-2
NCCCCC(N)C(O)=O	2,6-diaminohexanoic acid 2-amino-6-azaniumylhexanoate	2,6-diaminohexanoic acid 70-54-2 56-87-1 NCGC00166296-01 NCGC00164527-01 lysine acid lysine L-lys L-lysine LYS (+-)-2,6-Diaminohexanoic acid (+-)-Lysine (RS)-Lysine DL-Lysine DL-alpha,epsilon-Diaminocaproic acid EINECS 200-740-6 LYSINE (DL) Lysine, DL- Lysin alpha,epsilon-diaminocaproic acid CHEBI:25094 C16440 ()-2,6-Diaminocaproic acid L2513_SIGMA 2-amino-6-azaniumylhexanoate 2-amino-6-azaniumyl…	70-54-2 56-87-1
Cc1cc(N)cc(C)c1N	2,6-Dimethylbenzene-1,4-diamine	2,6-Dimethylbenzene-1,4-diamine (4-amino-2,6-dimethyl-phenyl)amine 7218-02-2 EINECS 230-608-3 4-Amino-2,6-dimethylaniline CCRIS 8131	7218-02-2
CC(C)=CCCC(C)(C)O	2,6-Dimethylhept-5-en-2-ol	2,6-Dimethylhept-5-en-2-ol 6090-15-9 2,6-Dimethyl-2-hepten-6-ol 2,6-Dimethyl-5-hepten-2-ol 5-Hepten-2-ol, 2,6-dimethyl- AI3-38066 EINECS 228-029-6	6090-15-9
CC(C)=CCCC(C)=C	2,6-Dimethylhepta-1,5-diene	2,6-Dimethylhepta-1,5-diene 6709-39-3 EINECS 229-757-7 2,6-Dimethyl-1,5-heptadiene 1,5-Heptadiene, 2,6-dimethyl-	6709-39-3
CC(C)CC(=O)CC(C)C	2,6-Dimethylheptan-4-one	2,6-Dimethylheptan-4-one 108-83-8 68514-40-9 4-HEPTANONE,2,6-DIMETHYL DIISOBUTYL,KETONE InChI=1/C9H18O/c1-7(2)5-9(10)6-8(3)4/h7-8H,5-6H2,1-4H 273848_ALDRICH Diisobutylketone 2,6-Dimethyl-4-heptanone 2,6-Dimethyl-heptan-4-on 2,6-Dimetil-eptan-4-one 4-Heptanone, 2,6-dimethyl- DIBK Di-isobutylcetone Diisobutilchetone Diisobutyl ketone Diisobutylketon Isobutyl ketone Isovalerone NSC15136 WLN: 1Y1 & 1…	108-83-8 68514-40-9
CC(CCCC(C)(C)OC(C)=O)C=C	2,6-Dimethyloct-7-en-2-yl acetate	2,6-Dimethyloct-7-en-2-yl acetate 1,1,5-trimethylhept-6-enyl acetate acetic acid 1,1,5-trimethylhept-6-enyl ester 2,6-dimethyloct-7-en-2-yl ethanoate 53767-93-4 7-Octen-2-ol, 2,6-dimethyl-, acetate EINECS 258-751-7 2,6-Dimethyl-7-octen-2-yl acetate	53767-93-4
NCC(=O)NCC(O)=O		2-[(2-aminoacetyl)amino]acetic acid 2-[(2-amino-1-oxoethyl)amino]acetic acid 2-(glycylamino)acetic acid 2-(2-aminoethanoylamino)ethanoic acid 61499-00-1 C02037 Glycylglycine Diglycine 50199_FLUKA Glycyl-glycine ST5411703 .alpha.-Glycylglycine G7278_SIGMA Glycine, N-glycyl- N-Glycylglycine NSC49346 Glycine dipeptide G3915_SIGMA InChI=1/C4H8N2O3/c5-1-3(7)6-2-4(8)9/h1-2,5H2,(H,6,7)(H,8,9 AIDS-018854…	61499-00-1
COc1cc(ccc1NCCO)N(=O)=O	2-[(2-methoxy-4-nitrophenyl)amino]ethanol	2-[(2-methoxy-4-nitrophenyl)amino]ethanol 2-[(2-methoxy-4-nitro-phenyl)amino]ethanol 66095-81-6 2-((2-Methoxy-4-nitrophenyl)amino)ethanol 2-Hydroxyethylamino-5-nitroanisole EINECS 266-138-0 Ethanol, 2-((2-methoxy-4-nitrophenyl)amino)-	66095-81-6
OCCNc1ccccc1N(=O)=O	2-[(2-nitrophenyl)amino]ethanol	2-[(2-nitrophenyl)amino]ethanol 4926-55-0 NSC 33878 ZINC03887467 NSC 68401 2-((2-Nitrophenyl)amino)ethanol Ethanol, 2-(o-nitroanilino)- (8CI) NSC68401 EINECS 225-555-8 Ethanol, 2-((2-nitrophenyl)amino)- 2-Nitro-N-(2-hydroxyethyl)aniline Ethanol, 2-(o-nitroanilino)- Ethanol, 2-[(2-nitrophenyl)amino]- HC Yellow No. 2 N-(2-Hydroxyethyl)-2-nitroaniline N-(2-Hydroxyethyl)-o-nitroaniline NSC33878	4926-55-0
COc1ccc(cc1N)NCCO	2-[(3-amino-4-methoxyphenyl)amino]ethanol	2-[(3-amino-4-methoxyphenyl)amino]ethanol 2-[(3-amino-4-methoxy-phenyl)amino]ethanol 83763-47-7 EINECS 280-733-2 Ethanol, 2-((3-amino-4-methoxyphenyl)amino)- 2-((3-Amino-4-methoxyphenyl)amino)ethanol 2-Amino-4-hydroxyethylaminoanisole	83763-47-7
NC(=O)CNc1cccc(O)c1	2-[(3-hydroxyphenyl)amino]acetamide	2-[(3-hydroxyphenyl)amino]acetamide 2-[(3-hydroxyphenyl)amino]ethanamide 7228-00-4 2-((3-Hydroxyphenyl)amino)acetamide EINECS 230-628-2	7228-00-4
Nc1ccc(cc1N(=O)=O)N(CCO)CCO	2-[(4-amino-3-nitrophenyl)-(2-hydroxyethyl)amino]ethanol	2-[(4-amino-3-nitrophenyl)-(2-hydroxyethyl)amino]ethanol 2-[(4-amino-3-nitro-phenyl)-(2-hydroxyethyl)amino]ethanol 29705-39-3 Ethanol, 2,2'-((4-amino-3-nitrophenyl)imino)bis- 2,2'-((4-Amino-3-nitrophenyl)imino)bisethanol	29705-39-3
Nc1ccc(cc1N(=O)=O)NCCO		2-[(4-amino-3-nitrophenyl)amino]ethanol 2-[(4-amino-3-nitro-phenyl)amino]ethanol 24905-87-1 2-((4-Amino-3-nitrophenyl)amino)ethanol 2-(4-Amino-3-nitroanilino)ethanol EINECS 246-521-9 Ethanol, 2-((4-amino-3-nitrophenyl)amino)- Ethanol, 2-(4-amino-3-nitroanilino)- HC Red no. 7
Nc1ccc(cc1)N(CCO)CCO		2-[(4-aminophenyl)-(2-hydroxyethyl)amino]ethanol SBB010947 ZINC05117196 Oprea1_006778 2-[(4-Amino-phenyl)-(2-hydroxy-ethyl)-amino]-ethanol 2,2'-(4-Aminophenylimino)diethanol EINECS 231-473-3 N,N-Bis-(2-hydroxyethyl)-4-phenylenediamine BAS 13520215 2,2'-(p-Aminophenylimino)diethanol
Cc1cc(c(cc1)NCCO)N(=O)=O	2-[(4-methyl-2-nitrophenyl)amino]ethanol	2-[(4-methyl-2-nitrophenyl)amino]ethanol 2-[(4-methyl-2-nitro-phenyl)amino]ethanol
CCC=CCCOCC=O		2-[(E)-hex-3-enoxy]acetaldehyde 2-hex-3-enoxyacetaldehyde 2-[(E)-hex-3-enoxy]ethanal 2-hex-3-enoxyethanal 68133-72-2 (Z)-(3-Hexenyloxy)acetaldehyde Acetaldehyde, ((3Z)-3-hexenyloxy)- Acetaldehyde, (3-hexenyloxy)-, (Z)- EINECS 268-699-7 cis-3-Hexenyl oxyacetaldehyde cis-3-Hexenyloxyacetaldehyde cis-Hexenyl oxyacetaldehyde	68133-72-2
OC(=O)C(Cc1ccccc1)NC(=O)Cc1c[nH]c2ccccc12	2-[[2-(1H-indol-3-yl)acetyl]amino]-3-phenylpropanoic acid	2-[[2-(1H-indol-3-yl)acetyl]amino]-3-phenylpropanoic acid 2-[[2-(1H-indol-3-yl)acetyl]amino]-3-phenyl-propanoic acid 2-[[2-(1H-indol-3-yl)-1-oxoethyl]amino]-3-phenylpropanoic acid 2-[[2-(1H-indol-3-yl)acetyl]amino]-3-phenyl-propionic acid 2-[2-(1H-indol-3-yl)ethanoylamino]-3-phenyl-propanoic acid
CC(=O)C(=NNc1ccc(cc1Cl)-c1cc(Cl)c(cc1)NN=C(C(=O)Nc1ccc(C)cc1C)C(C)=O)C(=O)Nc1ccc(C)cc1C	2-[[2-chloro-4-[3-chloro-4-[2-[1-[(2,4-dimethylphenyl)amino]-1,3-dioxobutan-2-ylidene]hydrazinyl]phenyl]phenyl]hydrazinylidene]-N-(2,4-dimethylphenyl)-3-oxobutanamide (2E)-2-[[2-chloro-4-[3-chloro-4-[(2E)-2-[1-[(2,4-dimethylphenyl)amino]-1,3-dioxobutan-2-ylidene]hydrazinyl]phenyl]phenyl]hydrazinylidene]-N-(2,4-dimethylphenyl)-3-oxobutanamide	2-[[2-chloro-4-[3-chloro-4-[2-[1-[(2,4-dimethylphenyl)amino]-1,3-dioxobutan-2-ylidene]hydrazinyl]phenyl]phenyl]hydrazinylidene]-N-(2,4-dimethylphenyl)-3-oxobutanamide (2E)-2-[[2-chloro-4-[3-chloro-4-[(2E)-2-[1-[(2,4-dimethylphenyl)amino]-1,3-dioxobutan-2-ylidene]hydrazinyl]phenyl]phenyl]hydrazinylidene]-N-(2,4-dimethylphenyl)-3-oxobutanamide (2E)-2-[[2-chloro-4-[3-chloro-4-[(N'E)-N'-[1-[(2,4-dime…
Cc1c(cccc1NCCO)NCCO		2-[[3-(2-hydroxyethylamino)-2-methylphenyl]amino]ethanol 2-[[3-(2-hydroxyethylamino)-2-methyl-phenyl]amino]ethanol
CC(=C)C(=O)OCCOC(=O)NCCC(C)CC(C)(C)CNC(=O)OCCOC(=O)C(C)=C	2-[[3,5,5-trimethyl-6-[2-(2-methylprop-2-enoyloxy)ethoxycarbonylamino]hexyl]carbamoyloxy]ethyl 2-methylprop-2-enoate	2-[[3,5,5-trimethyl-6-[2-(2-methylprop-2-enoyloxy)ethoxycarbonylamino]hexyl]carbamoyloxy]ethyl 2-methylprop-2-enoate 2-methylprop-2-enoic acid 2-[oxo-[[3,5,5-trimethyl-6-[[2-(2-methyl-1-oxoprop-2-enoxy)ethoxy-oxomethyl]amino]hexyl]amino]methoxy]ethyl ester 2-methylacrylic acid 2-[[6-(2-methacryloyloxyethoxycarbonylamino)-3,5,5-trimethyl-hexyl]carbamoyloxy]ethyl ester 122367-37-7 221391-32-8 72869…	122367-37-7 221391-32-8 72869-86-4 220896-20-8 41137-60-4 58608-10-9
OCCNc1ccc(cc1N(=O)=O)NCCO	2-[[4-(2-hydroxyethylamino)-3-nitrophenyl]amino]ethanol	2-[[4-(2-hydroxyethylamino)-3-nitrophenyl]amino]ethanol 2-[[4-(2-hydroxyethylamino)-3-nitro-phenyl]amino]ethanol 84041-77-0 2,2'-((2-Nitro-1,4-phenylene)diimino)bisethanol EINECS 281-856-4 Ethanol, 2,2'-((2-nitro-1,4-phenylene)diimino)bis- N,N'-Bis(2-hydroxyethyl)-2-nitro-p-phenylenediamine	84041-77-0
OCCNc1ccc(cc1N(=O)=O)N(CCO)CCO	2-[[4-(bis(2-hydroxyethyl)amino)-2-nitrophenyl]amino]ethanol	2-[[4-(bis(2-hydroxyethyl)amino)-2-nitrophenyl]amino]ethanol 2-[[4-(bis(2-hydroxyethyl)amino)-2-nitro-phenyl]amino]ethanol 33229-34-4 2,2'-((4-((2-Hydroxyethyl)amino)-3-nitrophenyl)imino)bis(ethanol) 2,2'-((4-((2-Hydroxyethyl)amino)-3-nitrophenyl)imino)bisethanol 3-Nitro-N(sup 1),N(sup 1),N(sup 4)-tris(2-hydroxyethyl)- BRN 2148848 CCRIS 1358 EINECS 251-410-3 Ethanol, 2,2'-((4-((2-hydroxyethyl)ami…
CCN(CCO)c1cc(c(cc1)NCCO)N(=O)=O	2-[[4-(ethyl-(2-hydroxyethyl)amino)-2-nitrophenyl]amino]ethanol	2-[[4-(ethyl-(2-hydroxyethyl)amino)-2-nitrophenyl]amino]ethanol 2-[[4-(ethyl-(2-hydroxyethyl)amino)-2-nitro-phenyl]amino]ethanol
CC(OCCc1ccccc1)OCCc1ccccc1	2-[1-(2-phenylethoxy)ethoxy]ethylbenzene	2-[1-(2-phenylethoxy)ethoxy]ethylbenzene 122-71-4 1,1-Bis(phenethyloxy)ethane Acetaldehyde diphenethyl acetal Benzene, 1,1'-(ethylidenebis(oxy-2,1-ethanediyl))bis- EINECS 204-568-2 Benzene, 1,1'-[ethylidenebis(oxy-2,1-ethanediyl)]bis- Phenylethylacetal	122-71-4
OCCOC(COCCO)C(OCCO)C(OCCO)C(COCCO)OCCO		2-[1,2,4,5,6-pentakis(2-hydroxyethoxy)hexan-3-yloxy]ethanol 2-[1-[1,2-bis(2-hydroxyethoxy)ethyl]-2,3,4-tris(2-hydroxyethoxy)butoxy]ethanol 39393-06-1 51923-21-8 53694-15-8 60739-59-5 64696-11-3 68189-06-0 94336-12-6 Poly(oxy-1,2-ethanediyl), alpha-hydro-omega-hydroxy-, ether with D-glucitol (6:1)
OCCOC(COCCO)COCCO		2-[1,3-bis(2-hydroxyethoxy)propan-2-yloxy]ethanol 2-[2-(2-hydroxyethoxy)-1-(2-hydroxyethoxymethyl)ethoxy]ethanol 30729-28-3 31694-55-0 37234-10-9 62886-79-7 9086-72-0 21156-05-8 223797-38-4 1,2,3-Propanetriol, ethoxylated 1,2,3-Propanetriol, polymer with oxirane Ethoxylated glycerin Ethoxylated glycerine Glycereth-12 Glycereth-20 Glycereth-26 Glycereth-7 Glycerin, ethylene oxide condensate Glycer…	30729-28-3 31694-55-0 37234-10-9 62886-79-7 9086-72-0 21156-05-8 223797-38-4
OCCOCCOCCO	2-[2-(2-hydroxyethoxy)ethoxy]ethanol	2-[2-(2-hydroxyethoxy)ethoxy]ethanol 118662-30-9 121202-29-7 676-18-6 112-27-6 EDO-EDO-EDO 90390_FLUKA InChI=1/C6H14O4/c7-1-3-9-5-6-10-4-2-8/h7-8H,1-6H 95126_FLUKA PGE 1,2-Bis(2-hydroxyethoxy)ethane 2,2'-Ethylenedioxydiethanol 2,2'-Ethylenedioxyethanol 3,6-Dioxaoctane-1,8-diol Di-.beta.-hydroxyethoxyethane Ethanol, 2,2'-(ethylenedioxy)di- Ethanol, 2,2'-[1,2-ethanediylbis(oxy)]bis- Ethylene glycol…	118662-30-9 121202-29-7 676-18-6 112-27-6
OCCNc1ccc(cc1OCCO)N(=O)=O	2-[2-(2-hydroxyethylamino)-5-nitrophenoxy]ethanol	2-[2-(2-hydroxyethylamino)-5-nitrophenoxy]ethanol 2-[2-(2-hydroxyethylamino)-5-nitro-phenoxy]ethanol 59820-43-8 NCGC00091524-01 2-((2-(2-Hydroxyethoxy)-4-nitrophenyl)amino)ethanol 2-(3-Nitro-6-(beta-hydroxyethylamino)phenoxy)ethanol CCRIS 4258 Ethanol, 2-((2-(2-hydroxyethoxy)-4-nitrophenyl)amino)- HC YELLOW NO. 4 HC Yellow 4 N,O-Di(2-hydroxyethyl)-2-amino-5-nitrophenol 2-({2-[(2-hydroxyethyl)amin…	59820-43-8
OCCSCCSCCO	2-[2-(2-hydroxyethylsulfanyl)ethylsulfanyl]ethanol	2-[2-(2-hydroxyethylsulfanyl)ethylsulfanyl]ethanol 2-[2-(2-hydroxyethylthio)ethylthio]ethanol 26652-79-9 5244-34-8 ST5308395 3,6-Dithiaoctane-1,8-diol 62150_FLUKA ZINC02140921 D5295_SIGMA Ethanol, 2,2'-(ethylenedithio)di- Ethanol, 2,2'-[1,2-ethanediylbis(thio)]bis- Ethylenedithioethanol 2,2&#8242;-(Ethylenedithio)diethanol 2,2'-(Ethylenedithio)diethanol 235334_ALDRICH Lindlar Catalyst Poison 2,2'…	26652-79-9 5244-34-8
CC(=C)C(=O)OCCOCCOC(=O)C(C)=C	2-[2-(2-methylprop-2-enoyloxy)ethoxy]ethyl 2-methylprop-2-enoate	2-[2-(2-methylprop-2-enoyloxy)ethoxy]ethyl 2-methylprop-2-enoate 2-methylprop-2-enoic acid 2-[2-(2-methyl-1-oxoprop-2-enoxy)ethoxy]ethyl ester 2-methylacrylic acid 2-(2-methacryloyloxyethoxy)ethyl ester 25101-18-2 129011-76-3 171428-77-6 2358-84-1 67957-99-7 76611-52-4 77302-64-8 DGM 2 DIETHYLENE GLYCOL BIS(METHACRYLATE) Diethylene glycol dimethacrylate Diethylene glycol dimethacrylate monomer Di…	25101-18-2 129011-76-3 171428-77-6 2358-84-1 67957-99-7 76611-52-4 77302-64-8
OCCN(CCO)CCN(CCO)CCO	2-[2-(bis(2-hydroxyethyl)amino)ethyl-(2-hydroxyethyl)amino]ethanol	2-[2-(bis(2-hydroxyethyl)amino)ethyl-(2-hydroxyethyl)amino]ethanol 140-07-8 2,2',2'',2'''-(1,2-Ethanediyldinitrilo)tetrakisethanol 2,2',2'',2'''-Ethylenedinitrilotetraethanol EINECS 205-396-0 Ethanol, 2,2',2'',2'''-(ethylenedinitrilo)tetra- (8CI) NSC 21705 Tetrahydroxyethyl ethylenediamine 2,2',2'',2'''-(Ethylenediimino)tetraethanol ENTOL Ethanol, 2,2',2'',2'''-(1,2-ethanediyldinitrilo)tetrakis- …
CCCCCCCCCCCC(=O)N(CC(O)=O)CCN(CC(O)=O)CC(O)=O	2-[2-(bis(carboxymethyl)amino)ethyl-dodecanoylamino]acetic acid	2-[2-(bis(carboxymethyl)amino)ethyl-dodecanoylamino]acetic acid 2-[2-(bis(carboxymethyl)amino)ethyl-dodecanoyl-amino]acetic acid 2-[2-(bis(carboxymethyl)amino)ethyl-(1-oxododecyl)amino]acetic acid 2-[2-(bis(carboxymethyl)amino)ethyl-lauroyl-amino]acetic acid 2-[2-(bis(carboxymethyl)amino)ethyl-dodecanoyl-amino]ethanoic acid
CCCCCCCCCC(=O)NCCN(CC(O)=O)CCOCC(O)=O	2-[2-(carboxymethyloxy)ethyl-[2-(decanoylamino)ethyl]amino]acetic acid	2-[2-(carboxymethyloxy)ethyl-[2-(decanoylamino)ethyl]amino]acetic acid 2-[2-(carboxymethyloxy)ethyl-[2-(1-oxodecylamino)ethyl]amino]acetic acid 2-[2-(caprylamino)ethyl-[2-(carboxymethyloxy)ethyl]amino]acetic acid 2-[2-(carboxymethyloxy)ethyl-[2-(decanoylamino)ethyl]amino]ethanoic acid
CCCCCCCC(=O)NCCN(CC(O)=O)CCOCC(O)=O		2-[2-(carboxymethyloxy)ethyl-[2-(octanoylamino)ethyl]amino]acetic acid 2-[2-(carboxymethyloxy)ethyl-[2-(1-oxooctylamino)ethyl]amino]acetic acid 2-[2-(caprylylamino)ethyl-[2-(carboxymethyloxy)ethyl]amino]acetic acid 2-[2-(carboxymethyloxy)ethyl-[2-(octanoylamino)ethyl]amino]ethanoic acid
CCCCCCCCCCCC(=O)NCCN(CC(O)=O)CCO	2-[2-(dodecanoylamino)ethyl-(2-hydroxyethyl)amino]acetic acid	2-[2-(dodecanoylamino)ethyl-(2-hydroxyethyl)amino]acetic acid 2-[2-hydroxyethyl-[2-(1-oxododecylamino)ethyl]amino]acetic acid 2-[2-hydroxyethyl-[2-(lauroylamino)ethyl]amino]acetic acid 2-[2-(dodecanoylamino)ethyl-(2-hydroxyethyl)amino]ethanoic acid
C1OC1c1ccccc1C1CO1	2-[2-(oxiran-2-yl)phenyl]oxirane	2-[2-(oxiran-2-yl)phenyl]oxirane 2-[2-(2-oxiranyl)phenyl]oxirane 2246-49-3 16832-59-0 EINECS 218-837-7 EINECS 240-854-3 m-Bis(epoxyethyl)benzene o-Bis(epoxyethyl)benzene	2246-49-3 16832-59-0
C[N+](C)(C)CCOP(O)(=O)OCC(COC(=O)CCCCCCCC=CCCCCCCCCC)OC(=O)CCCCCCCC=CCCCCCCCCC	2-[2,3-bis[[(E)-nonadec-9-enoyl]oxy]propoxy-hydroxyphosphoryl]oxyethyl-trimethylazanium	2-[2,3-bis[[(E)-nonadec-9-enoyl]oxy]propoxy-hydroxyphosphoryl]oxyethyl-trimethylazanium 2-[2,3-bis[[(E)-nonadec-9-enoyl]oxy]propoxy-hydroxy-phosphoryl]oxyethyl-trimethyl-ammonium 2-[2,3-bis[(E)-1-oxononadec-9-enoxy]propoxy-hydroxyphosphoryl]oxyethyl-trimethylammonium 2-[2,3-bis[[(E)-nonadec-9-enoyl]oxy]propoxy-hydroxy-phosphoryl]oxyethyl-trimethyl-azanium LS-2447
CCCCCCOCCOCCOCCOCC(O)=O	2-[2-[2-(2-hexoxyethoxy)ethoxy]ethoxy]acetic acid	2-[2-[2-(2-hexoxyethoxy)ethoxy]ethoxy]acetic acid 2-[2-[2-(2-hexoxyethoxy)ethoxy]ethoxy]ethanoic acid
CC(=C)C(=O)OCCOCCOCCOC(=O)C(C)=C	2-[2-[2-(2-methylprop-2-enoyloxy)ethoxy]ethoxy]ethyl 2-methylprop-2-enoate	2-[2-[2-(2-methylprop-2-enoyloxy)ethoxy]ethoxy]ethyl 2-methylprop-2-enoate 2-methylprop-2-enoic acid 2-[2-[2-(2-methyl-1-oxoprop-2-enoxy)ethoxy]ethoxy]ethyl ester 2-methylacrylic acid 2-[2-(2-methacryloyloxyethoxy)ethoxy]ethyl ester 113723-03-8 116117-65-8 120415-48-7 121150-61-6 121484-13-7 143083-95-8 184845-37-2 202134-79-0 212247-03-5 37291-80-8 52325-89-0 64641-52-7 72145-92-7 76611-53-5 773…	113723-03-8 116117-65-8 120415-48-7 121150-61-6 121484-13-7 143083-95-8 184845-37-2 202134-79-0 212247-03-5 37291-80-8 52325-89-0 64641-52-7 72145-92-7 76611-53-5 77302-65-9 109-16-0 102770-39-8 107869-00-1
[H]/N=C(/N)\NCCSSCCN/C(/N)=N\[H]	2-[2-[2-(diaminomethylideneamino)ethyldisulfanyl]ethyl]guanidine	2-[2-[2-(diaminomethylideneamino)ethyldisulfanyl]ethyl]guanidine 2-[2-(2-guanidinoethyldisulfanyl)ethyl]guanidine Lopac-G-4788 NCGC00015473-01 HSCI1_000328 Bis(2-guanidinoethyl)disulfide 2-Guanidinoethyl disulfide Lopac0_000490 Bis(2-guanidoethyl)disulphide Guanidine, 1,1'-(dithiodiethylene)di- Guanidine, N,N'-(dithiodi-2,1-ethanediyl)bis- (9CI) Guanidinoethyl disulfide Guanidoethyl disulfide Gua…
CCCCCCCCCCCCNCCNCCNCC(O)=O	2-[2-[2-(dodecylamino)ethylamino]ethylamino]acetic acid	2-[2-[2-(dodecylamino)ethylamino]ethylamino]acetic acid 2-[2-[2-(laurylamino)ethylamino]ethylamino]acetic acid 2-[2-[2-(dodecylamino)ethylamino]ethylamino]ethanoic acid 73201-27-1 Dodecylbis(aminoethyl)glycine Dodicin Dodicin [BAN] EINECS 229-930-7 EPA Pesticide Chemical Code 413300 Glycine, N-(2-((2-(dodecylamino)ethyl)amino)ethyl)- Lauryl diethylenediaminoglycine N-(2-((-(Dodecylamino)ethyl)ami…	73201-27-1
CCCCCCCCCCCCOCCOCCOCCOCCOCCOCCOCCO	2-[2-[2-[2-[2-[2-(2-dodecoxyethoxy)ethoxy]ethoxy]ethoxy]ethoxy]ethoxy]ethanol	2-[2-[2-[2-[2-[2-(2-dodecoxyethoxy)ethoxy]ethoxy]ethoxy]ethoxy]ethoxy]ethanol 2-[2-[2-[2-[2-[2-(2-lauryloxyethoxy)ethoxy]ethoxy]ethoxy]ethoxy]ethoxy]ethanol 3055-97-8 3,6,9,12,15,18,21-Heptaoxatritriacontan-1-ol EINECS 221-283-9 Laureth-7 Lauryl alcohol hexa(oxyethylene) ethanol PEG-7 Lauryl ether Polyethylene glycol (7) lauryl ether Polyoxyethylene (7) lauryl ether Heptaethylene glycol monododec…	3055-97-8
CCCCCCCCCCCCOCCOCCOCCOCCOCCOCCOCCOCCO	2-[2-[2-[2-[2-[2-[2-(2-dodecoxyethoxy)ethoxy]ethoxy]ethoxy]ethoxy]ethoxy]ethoxy]ethanol	2-[2-[2-[2-[2-[2-[2-(2-dodecoxyethoxy)ethoxy]ethoxy]ethoxy]ethoxy]ethoxy]ethoxy]ethanol 2-[2-[2-[2-[2-[2-[2-(2-lauryloxyethoxy)ethoxy]ethoxy]ethoxy]ethoxy]ethoxy]ethoxy]ethanol 101226-62-4 3055-98-9 81208-94-8 Octaethyleneglycol-dodecylmonoether dodecyloctaethyleneglycol monoether n-Dodecyl octaethylene glycol monoether C-12-E-8 C12E8 Dodecyl octaethylene glycol ether Dodecyloctaglycol 55377_FLUK…	101226-62-4 3055-98-9 81208-94-8
OCCOCCOCCOCCOCCOCCOCCOCCO	2-[2-[2-[2-[2-[2-[2-(2-hydroxyethoxy)ethoxy]ethoxy]ethoxy]ethoxy]ethoxy]ethoxy]ethanol	2-[2-[2-[2-[2-[2-[2-(2-hydroxyethoxy)ethoxy]ethoxy]ethoxy]ethoxy]ethoxy]ethoxy]ethanol 5117-19-1 EINECS 225-856-4 15879_FLUKA PED-diol (n=8) CHEBI:44794 Octaethylene glycol 3,6,9,12,15,18,21-HEPTAOXATRICOSANE-1,23-DIOL PE8	5117-19-1
CCCCCCCCCCCCOCCOCCOCCOCCOCCOCCOCCOCCOCCO		2-[2-[2-[2-[2-[2-[2-[2-(2-dodecoxyethoxy)ethoxy]ethoxy]ethoxy]ethoxy]ethoxy]ethoxy]ethoxy]ethanol 2-[2-[2-[2-[2-[2-[2-[2-(2-lauryloxyethoxy)ethoxy]ethoxy]ethoxy]ethoxy]ethoxy]ethoxy]ethoxy]ethanol 3055-99-0 Dodecyl nonaethylene glycol ether Dodecylnonaglycol P9641_SIGMA Polyoxyethylene 9 lauryl ether 3,6,9,12,15,18,21,24,27-Nonaoxanonatriacontan-1-ol CHEBI:46859 DODECYL NONA ETHYLENE GLYCOL ETHER…	3055-99-0
CCCCCCCCOCCOCCOCCOCCOCCOCCOCCOCCOCC(O)=O	2-[2-[2-[2-[2-[2-[2-[2-(2-octoxyethoxy)ethoxy]ethoxy]ethoxy]ethoxy]ethoxy]ethoxy]ethoxy]acetic acid	2-[2-[2-[2-[2-[2-[2-[2-(2-octoxyethoxy)ethoxy]ethoxy]ethoxy]ethoxy]ethoxy]ethoxy]ethoxy]acetic acid 2-[2-[2-[2-[2-[2-[2-[2-(2-octoxyethoxy)ethoxy]ethoxy]ethoxy]ethoxy]ethoxy]ethoxy]ethoxy]ethanoic acid
CCCCCCCCCCCCOCCOCCOCCOCCOCCOCCOCCOCCOCCOCCOCCOCCO	2-[2-[2-[2-[2-[2-[2-[2-[2-[2-[2-(2-dodecoxyethoxy)ethoxy]ethoxy]ethoxy]ethoxy]ethoxy]ethoxy]ethoxy]ethoxy]ethoxy]ethoxy]ethanol	2-[2-[2-[2-[2-[2-[2-[2-[2-[2-[2-(2-dodecoxyethoxy)ethoxy]ethoxy]ethoxy]ethoxy]ethoxy]ethoxy]ethoxy]ethoxy]ethoxy]ethoxy]ethanol 2-[2-[2-[2-[2-[2-[2-[2-[2-[2-[2-(2-lauryloxyethoxy)ethoxy]ethoxy]ethoxy]ethoxy]ethoxy]ethoxy]ethoxy]ethoxy]ethoxy]ethoxy]ethanol 3056-00-6 3,6,9,12,15,18,21,24,27,30,33,36-Dodecaoxaoctatetracontan-1-ol EINECS 221-286-5 Laureth-12 PEG-12 Lauryl ether Polyethylene glycol 6…	3056-00-6
CC(C)(C)CC(C)(C)c1ccc(cc1)OCCOCCOCCS(O)(=O)=O	2-[2-[2-[4-(2,4,4-trimethylpentan-2-yl)phenoxy]ethoxy]ethoxy]ethanesulfonic acid	2-[2-[2-[4-(2,4,4-trimethylpentan-2-yl)phenoxy]ethoxy]ethoxy]ethanesulfonic acid 2-[2-[2-[4-(1,1,3,3-tetramethylbutyl)phenoxy]ethoxy]ethoxy]ethanesulfonic acid 55837-16-6	55837-16-6
CCCCCCCCC=CCCCCCCCC(=O)NCCN(CC(O)=O)CCO	2-[2-hydroxyethyl-[2-[[(E)-octadec-9-enoyl]amino]ethyl]amino]acetic acid	2-[2-hydroxyethyl-[2-[[(E)-octadec-9-enoyl]amino]ethyl]amino]acetic acid 2-[2-hydroxyethyl-[2-[[(E)-1-oxooctadec-9-enyl]amino]ethyl]amino]acetic acid 2-[2-hydroxyethyl-[2-[[(E)-octadec-9-enoyl]amino]ethyl]amino]ethanoic acid 93893-26-6 (Z)-N-(2-Hydroxyethyl)-N-(2-((1-oxo-9-octadecenyl)amino)ethyl)glycine EINECS 299-614-1	93893-26-6
CCCCCCCCCCCCNCCCNCC(O)=O	2-[3-(dodecylamino)propylamino]acetic acid	2-[3-(dodecylamino)propylamino]acetic acid 2-[3-(laurylamino)propylamino]acetic acid 2-[3-(dodecylamino)propylamino]ethanoic acid 34395-72-7 6-Dodecyl-2,6-diazahexane-1-carboxylic acid EINECS 251-993-4 Glycine, N-(3-(dodecylamino)propyl)- Lauryl aminopropylglycine N-(3-(Dodecylamino)propyl)glycine	34395-72-7
CCCCCCCCCCCCCCCC(=O)NCCC[N+](C)(C)CC([O-])=O	2-[3-(hexadecanoylamino)propyl-dimethylazaniumyl]acetate	2-[3-(hexadecanoylamino)propyl-dimethylazaniumyl]acetate 2-[3-(hexadecanoylamino)propyl-dimethyl-ammonio]acetate 2-[dimethyl-[3-(1-oxohexadecylamino)propyl]ammonio]acetate 2-(dimethyl-(3-palmitamidopropyl)ammonio)acetate 2-[3-(hexadecanoylamino)propyl-dimethyl-azaniumyl]ethanoate 32954-43-1 68928-60-9 21244-99-5 N-Palmitoylamidopropyl-N,N-dimethylbetaine Palmitamidopropyl betaine Pendecamaina [IN…	32954-43-1 68928-60-9 21244-99-5
CC(C)=CCCC(C)CC(OCCc1ccccc1)OCCc1ccccc1	2-[3,7-dimethyl-1-(2-phenylethoxy)oct-6-enoxy]ethylbenzene	2-[3,7-dimethyl-1-(2-phenylethoxy)oct-6-enoxy]ethylbenzene 68140-52-3 2-Octene, 2,6-dimethyl-8,8-bis(2-phenylethoxy)- Benzene, 1,1'-((3,7-dimethyl-6-octenylidene)bis(oxy-2,1-ethanediyl))bis- EINECS 268-804-6 1,1'-((3,7-Dimethyl-6-octenylidene)bis(oxyethylene))bisbenzene	68140-52-3
CC(C)(C)CC(C)(C)c1ccc(cc1)OCCO		2-[4-(2,4,4-trimethylpentan-2-yl)phenoxy]ethanol 2-[4-(1,1,3,3-tetramethylbutyl)phenoxy]ethanol 81398-86-9 9010-42-8 9010-43-9 9077-65-0 9002-93-1 2315-67-5 63869-93-2 111287-03-7 125692-92-4 13463-07-5 39409-11-5 66057-68-9 66057-69-0 66057-82-7 Triton X-100 (TN) 2-(4-(1,1,3,3-Tetramethylbutyl)phenoxy)ethanol 2-(p-(1,1,3,3-Tetramethylbutyl)phenoxy)ethanol ETHANOL, 2-(P-(1,1,3,3-TETRAMETHYLBUTYL)…	81398-86-9 9010-42-8 9010-43-9 9077-65-0 9002-93-1 2315-67-5 63869-93-2 111287-03-7 125692-92-4 13463-07-5 39409-11-5 66057-68-9 66057-69-0 66057-82-7
CC(C)(C)CC(C)(C)c1ccc(cc1)OCCOS(O)(=O)=O	2-[4-(2,4,4-trimethylpentan-2-yl)phenoxy]ethyl hydrogen sulfate	2-[4-(2,4,4-trimethylpentan-2-yl)phenoxy]ethyl hydrogen sulfate 2-[4-(1,1,3,3-tetramethylbutyl)phenoxy]ethyl hydrogen sulfate
OCCC1NC(CCO)NC(CCO)N1	2-[4,6-bis(2-hydroxyethyl)-1,3,5-triazinan-2-yl]ethanol	2-[4,6-bis(2-hydroxyethyl)-1,3,5-triazinan-2-yl]ethanol 63310-09-8 1,3,5-TRIHYDROXYETHYLHEXAHYDROTRIAZINE 1,3,5-Tris(2-hydroxyethyl)hexahydro-1,3,5-triazine 1,3,5-Tris(2-hydroxyethyl)hexahydro-s-triazine 1,3,5-Tris(hydroxy-ethyl)s-hexahydrotriazine 2,2',2''-(Hexahydro-1,3,5-triazine-1,3,5-triyl)triethanol 4-26-00-00010 (Beilstein Handbook Reference) Actane BRN 0124982 Busan 1060 CCRIS 6246 Caswel…	63310-09-8
[H]/N=C(/Nc1ccc(Cl)cc1)\N/C(/NCCCCCCN/C(/N/C(/Nc1ccc(Cl)cc1)=N\[H])=N\[H])=N/[H]		2-[6-[[amino-[[amino-[(4-chlorophenyl)amino]methylidene]amino]methylidene]amino]hexyl]-1-[amino-[(4-chlorophenyl)amino]methylidene]guanidine (1Z)-2-[6-[[amino-[[amino-[(4-chlorophenyl)amino]methylidene]amino]methylidene]amino]hexyl]-1-[amino-[(4-chlorophenyl)amino]methylidene]guanidine (1E)-2-[6-[[amino-[[amino-[(4-chlorophenyl)amino]methylidene]amino]methylidene]amino]hexyl]-1-[amino-[(4-chlorop…
CCCCCCCCC=CCCCCCCCC[N+](C)(C)CC([O-])=O	2-[dimethyl-[(E)-octadec-9-enyl]azaniumyl]acetate	2-[dimethyl-[(E)-octadec-9-enyl]azaniumyl]acetate 2-[dimethyl-[(E)-octadec-9-enyl]ammonio]acetate 2-[dimethyl-[(E)-octadec-9-enyl]azaniumyl]ethanoate
CCCCCCCCCCCCCCCCCC(=O)NCCC[N+](C)(C)CC([O-])=O		2-[dimethyl-[3-(octadecanoylamino)propyl]azaniumyl]acetate 2-[dimethyl-[3-(octadecanoylamino)propyl]ammonio]acetate 2-[dimethyl-[3-(1-oxooctadecylamino)propyl]ammonio]acetate 2-(dimethyl-(3-stearamidopropyl)ammonio)acetate 2-[dimethyl-[3-(octadecanoylamino)propyl]azaniumyl]ethanoate 39761-83-6 6179-44-8 (Carboxymethyl)dimethyl-3-((1-oxooctadecyl)amino)propylammonium hydroxide 1-Propanaminium, N-(…
CCCCCCCCCCCCCC(=O)NCCC[N+](C)(C)CC([O-])=O	2-[dimethyl-[3-(tetradecanoylamino)propyl]azaniumyl]acetate	2-[dimethyl-[3-(tetradecanoylamino)propyl]azaniumyl]acetate 2-[dimethyl-[3-(tetradecanoylamino)propyl]ammonio]acetate 2-[dimethyl-[3-(1-oxotetradecylamino)propyl]ammonio]acetate 2-[dimethyl-[3-(tetradecanoylamino)propyl]azaniumyl]ethanoate 59272-84-3 (Carboxymethyl)dimethyl-3-((1-oxotetradecyl)amino)propylammonium hydroxide 1-Propanaminium, N-(carboxymethyl)-N,N-dimethyl-3-((1-oxotetradecyl)amino…	59272-84-3
CCCCCCCCC=CCCCCCCCC(=O)NCCC[N+](C)(C)CC([O-])=O	2-[dimethyl-[3-[[(E)-octadec-9-enoyl]amino]propyl]azaniumyl]acetate	2-[dimethyl-[3-[[(E)-octadec-9-enoyl]amino]propyl]azaniumyl]acetate 2-[dimethyl-[3-[[(E)-octadec-9-enoyl]amino]propyl]ammonio]acetate 2-[dimethyl-[3-[[(E)-1-oxooctadec-9-enyl]amino]propyl]ammonio]acetate 2-[dimethyl-[3-[[(E)-octadec-9-enoyl]amino]propyl]azaniumyl]ethanoate
C=CCOC1CC2CC1C1C=CCC21		2279-18-7 104263-79-8 26912-64-1 4,7-Methano-1H-indene, 3a,4,5,6,7,7a-hexahydro-5(or 6)-(2-propenyloxy)- 4,7-Methano-1H-indene, 3a,4,5,6,7,7a-hexahydro-5-(2-propenyloxy)- 5-(Allyloxy)-3a,4,5,6,7,7a-hexahydro-4,7-methano-1H-indene EINECS 218-908-2 Hexahydro-4,7-methanoinden-5(or 6)-propenyl ether	2279-18-7 104263-79-8 26912-64-1
CC(C)=CCCC(C)=CCCC(C)=CCSCC(NC(C)=O)C(O)=O		2-acetamido-3-(3,7,11-trimethyldodeca-2,6,10-trienylsulfanyl)propanoic acid 2-acetamido-3-[(2E,6E)-3,7,11-trimethyldodeca-2,6,10-trienyl]sulfanylpropanoic acid 2-acetamido-3-[(2E,6E)-3,7,11-trimethyldodeca-2,6,10-trienyl]sulfanyl-propanoic acid 2-acetamido-3-[[(2E,6E)-3,7,11-trimethyldodeca-2,6,10-trienyl]thio]propanoic acid 2-acetamido-3-(3,7,11-trimethyldodeca-2,6,10-trienylthio)propanoic acid …
CC(=O)NC(CS)C(O)=O	2-acetamido-3-sulfanylpropanoic acid	2-acetamido-3-sulfanylpropanoic acid 2-acetamido-3-sulfanyl-propanoic acid 2-acetamido-3-mercaptopropanoic acid 2-acetamido-3-mercapto-propionic acid 616-91-1 SPECTRUM1500105 Acetylcysteine (JAN/USP/INN) D00221 Mucomyst (TN) NCI60_000255 WLN: SH1YVQMV1 -L AcCySR CPD1G-185 N-acetylcysteinyl conjugate mercapturic acid Flumicil L-Cysteine, N-acetyl-, NSC111180 Sodium 2-acetamido-3-mercaptopropionate…	616-91-1
CC(=O)NC(CCSC)C(O)=O	2-acetamido-4-methylsulfanylbutanoic acid	2-acetamido-4-methylsulfanylbutanoic acid 2-acetamido-4-methylsulfanyl-butanoic acid 2-acetamido-4-(methylthio)butanoic acid 2-acetamido-4-(methylthio)butyric acid 25129-27-5 65-82-7 10402-93-4 98672-82-3 1509-92-8 ALD-N026671 C02712 N-Acetylmethionine 01310_FLUKA Acetylmethionin Acetylmethionine Methionin NSC118514 WLN: 1VMYVQ2S1 Thiomedon EINECS 214-224-3 A17900_ALDRICH BRN 1725554 EINECS 216-1…	25129-27-5 65-82-7 10402-93-4 98672-82-3 1509-92-8
CC(=O)NC(CCC(N)=O)C(O)=O	2-acetamido-5-amino-5-oxopentanoic acid	2-acetamido-5-amino-5-oxopentanoic acid 2-acetamido-5-amino-5-oxo-pentanoic acid 2-acetamido-5-amino-5-keto-valeric acid 30703-24-3 7577-60-8 2490-97-3 N-Acetyl-L-glutamine .alpha.-N-Acetyl-L-glutamine Aceglutamid Aceglutamide Acetylglutamine Glutamine, N2-acetyl-, L- L-Glutamine, N2-acetyl- N(sup2)-Acetyl-L-glutamine L-2-Acetamidoglutaramic acid N2-Acetyl-L-glutamine NSC186896 Aceglutamida [INN-…	30703-24-3 7577-60-8 2490-97-3
CC(=O)NC(CCC(O)=O)C(O)=O		2-acetamidopentanedioic acid 2-acetamidoglutaric acid 1188-37-0 5817-08-3 EINECS 227-388-6 ACETYL-GLU N-acetyl L-glutamic acid N-acetyl-L-glutamate N-acetyl-glutamate N-acetylglutamic acid acetyl-glutamate NCGC00094839-01 NCGC00094839-02 Acetyl-L-glutamic acid A8875_SIGMA Glutamic acid, N-acetyl- DivK1c_001273 DL-Acetylglutamic acid CDS1_000233 N-Acetyl-DL-glutamic acid BB_NC-0521 Maybridge1_0025…	1188-37-0 5817-08-3
[H]/N=C1/NC(=O)CN/1C	2-amino-1-methyl-5H-imidazol-4-one	2-amino-1-methyl-5H-imidazol-4-one 15231-31-9 45514-66-7 82016-55-5 60-27-5 KBioSS_000909 1-Methylglycocyamidine C00791 AO-840/40806907 DivK1c_000351 SPECTRUM1600300 NINDS_000351 KBio3_002554 SDCCGMLS-0066864.P001 Spectrum3_001717 Spectrum4_001806 KBio2_000909 BSPBio_003334 2-Imino-1-methylimidazolidin-4-one AI3-15321 Creatinine (VAN) (8CI) Creatinine,heated EINECS 200-466-7 NSC 13123 SPBio_00080…	15231-31-9 45514-66-7 82016-55-5 60-27-5
CCC(N)(CO)CO	2-amino-2-ethylpropane-1,3-diol	2-amino-2-ethylpropane-1,3-diol 2-amino-2-ethyl-propane-1,3-diol 115-70-8 AI3-03358 Aminoethyl propanediol EINECS 204-101-2 NSC 8803 2-Amino-1,3-dihydroxy-2-ethylpropane 1,3-Propanediol, 2-amino-2-ethyl- 2-Ethyl-2-aminopropanediol AEPD NSC8803 ST5412012 AIDS-018599 InChI=1/C5H13NO2/c1-2-5(6,3-7)4-8/h7-8H,2-4,6H2,1H AIDS018599 2-AMINO-2-ETHYL-1,3-PROPANEDIOL 2-Amino-2-ethylpropanediol	115-70-8
CC(N)(CO)CO		2-Amino-2-methylpropane-1,3-diol 2-amino-2-methyl-propane-1,3-diol 115-69-5 17162-11-7 1,1-Di(hydroxymethyl)ethylamine 1,3-Propanediol, 2-amino-2-methyl- 2-Amino-2-methyl-1,3-propanediol 2-Amino-2-methylpropanediol AMPD Aminoglycol Gentimon Isobutandiol-2-amine NSC6364 WLN: Q1XZ1 & 1Q CHEBI:991 A9074_SIGMA 4-04-00-01881 (Beilstein Handbook Reference) AI3-03949 BRN 0635708 EINECS 204-100-7 NSC 636…
NC(Cc1c[nH]c2ccccc21)C(O)=O		2-amino-3-(1H-indol-3-yl)propanoic acid 2-amino-3-(1H-indol-3-yl)propionic acid 6912-86-3 73-22-3 27813-82-7 54-12-6 KBio3_002158 Propionic acid, 2-amino-3-indol-3-yl NSC97942 Tryptophan, D- CHEBI:27897 alpha-amino-beta-3-indolepropionic acid beta-3-indolylalanine AI3-24395 KBio2_003075 KBio2_005643 CCRIS 719 SPBio_001204 BSPBio_002938 STK029637 Spectrum5_001310 NCIOpen2_006535 NCGC00094805-02 AR…	6912-86-3 73-22-3 27813-82-7 54-12-6
NC(CSSCC(N)C(O)=O)C(O)=O	2-amino-3-(2-amino-3-hydroxy-3-oxopropyl)disulfanylpropanoic acid 2-azaniumyl-3-(2-azaniumyl-3-oxido-3-oxopropyl)disulfanylpropanoate	2-amino-3-(2-amino-3-hydroxy-3-oxopropyl)disulfanylpropanoic acid 2-amino-3-(2-amino-3-hydroxy-3-oxo-propyl)disulfanyl-propanoic acid 2-amino-3-(2-amino-3-hydroxy-3-keto-propyl)disulfanyl-propionic acid 923-32-0 24645-67-8 3,3'-Dithiobis(2-aminopropanoic acid), dl- Propanoic acid, 3,3'-dithiobis(2-amino-, (R-(R*,R*))- 30220_FLUKA ST5319354 EINECS 200-296-3 CYSTINE L-cystine NSC205366 meso-Cystine…	923-32-0 24645-67-8
NC(CC1=CNC(=S)N1)C(O)=O		2-amino-3-(2-sulfanylidene-1,3-dihydroimidazol-4-yl)propanoic acid 2-amino-3-(2-thioxo-1,3-dihydroimidazol-4-yl)propanoic acid 2-amino-3-(2-thioxo-1,3-dihydroimidazol-4-yl)propionic acid 13552-61-9 ST5437245 1H-Imidazole-4-propanoic acid, alpha-amino-2,3-dihydro-2-thioxo- 2-Thiol-L-histidine 2-Thiolhistidine Histidine-2-thiol	13552-61-9
NC(Cc1c[nH]c2ccc(O)cc21)C(O)=O	2-amino-3-(5-hydroxy-1H-indol-3-yl)propanoic acid	2-amino-3-(5-hydroxy-1H-indol-3-yl)propanoic acid 2-amino-3-(5-hydroxy-1H-indol-3-yl)propionic acid 34953-84-9 56-69-9 114-03-4 4298-20-8 72572-97-5 72572-98-6 5-22-14-00278 (Beilstein Handbook Reference) 5-Hydroxytryptophan L-form BRN 0088200 CCRIS 4418 Cincofarm EINECS 224-411-1 L-5-Hydroxytryptophan L-Tryptophan, 5-hydroxy- Levothym Oxitriptan [INN] Oxitriptano [INN-Spanish] Oxitriptanum [INN-…	34953-84-9 56-69-9 114-03-4 4298-20-8 72572-97-5 72572-98-6
CC(C)C(N)C(O)=O	2-Amino-3-methylbutanoic acid 2-azaniumyl-3-methylbutanoate	2-Amino-3-methylbutanoic acid 2-amino-3-methyl-butanoic acid 2-amino-3-methyl-butyric acid 186023-77-8 72-18-4 516-06-3 DL-2-Amino-3-methylbutanoic acid 2-Amino-3-methylbutanoic acid, DL- Valine, DL- W344400_ALDRICH Butanoic acid, 2-amino-3-methyl- Butanoic acid, 2-amino-3-methyl-, (S)- L-(+)-.alpha.-Aminoisovaleric acid NSC76038 VALINE, (L) Valine, L- WLN: QVYZY1&1 WLN: QVYZY1&1 -L V0375_SIGMA C…	186023-77-8 72-18-4 516-06-3
NC(CS)C(O)=O	2-amino-3-sulfanylpropanoic acid 2-azaniumyl-3-sulfanylpropanoate	2-amino-3-sulfanylpropanoic acid 2-amino-3-sulfanyl-propanoic acid 2-amino-3-mercaptopropanoic acid 2-amino-3-mercapto-propionic acid 4371-52-2 52-90-4 3374-22-9 L-HSCH2CH(NH2)COOH CYS L-cysteine cysteine CHEBI:15356 Hcys (+-)-Cysteine EINECS 222-160-2 NSC 63864 dl-Cysteina [Polish] ()-2-Amino-3-mercaptopropionic acid 40912_FLUKA AIDS-160777 Zystein D-CYSTEINE NCGC00160365-01 NSC647530 861677_ALD…	4371-52-2 52-90-4 3374-22-9 7242-49-1
CC(C)CC(N)C(O)=O	2-Amino-4-methylpentanoic acid 2-azaniumyl-4-methylpentanoate	2-Amino-4-methylpentanoic acid 2-amino-4-methyl-pentanoic acid 61-90-5 7005-03-0 328-39-2 .alpha.-Aminoisocaproic acid L(+)-Leucine L-(-)-2-Amino-4-methylpentanoic acid LEUCINE,(L) Leucine, L- NSC46709 Norvaline, 4-methyl- Pentanoic acid, 2-amino-4-methyl- Pentanoic acid, 2-amino-4-methyl-, (S)- Valeric acid, 2-amino-4-methyl- WLN: QVYZ1Y1&1 -L NCI60_004103 L5897_SIGMA 61840_FLUKA L7875_SIGMA L-L…	61-90-5 7005-03-0 328-39-2
CSCCC(N)C(O)=O		2-amino-4-methylsulfanylbutanoic acid 2-amino-4-methylsulfanyl-butanoic acid 2-amino-4-(methylthio)butanoic acid 2-Amino-4-(methylthio)butyric acid 63-68-3 7005-18-7 59-51-8 Methilanin Urimeth C01733 (+-)-Methionine AI3-18475 CCRIS 3717 DL-2-Amino-4-(methylthio)-butyric acid DL-Methioninum EINECS 200-432-1 FEMA No. 3301 Methionine DL- Methionine, amorphous NSC 9241 Pedameth Racemethionine Racemet…	63-68-3 7005-18-7 59-51-8
NC(=O)NCCCC(N)C(O)=O	2-amino-5-(carbamoylamino)pentanoic acid	2-amino-5-(carbamoylamino)pentanoic acid 2-amino-5-ureido-pentanoic acid 2-amino-5-ureidopentanoic acid 2-amino-5-ureido-valeric acid 2-amino-5-(aminocarbonylamino)pentanoic acid 627-77-0 372-75-8 13594-51-9 N(5)-carbamoyl-DL-ornithine N(5)-carbamoylornithine citrulina KBioSS_000397 DivK1c_006619 BSPBio_002570 SDCCGMLS-0066976.P001 EINECS 211-012-2 to_000034 DL-Citrulline NSC46711 Spectrum5_00179…
NC(CCC(=O)NC(CSSCC(NC(=O)CCC(N)C(O)=O)C(=O)NCC(O)=O)C(=O)NCC(O)=O)C(O)=O	2-amino-5-[[3-[2-[(4-amino-5-hydroxy-5-oxopentanoyl)amino]-3-(carboxymethylamino)-3-oxopropyl]disulfanyl-1-(carboxymethylamino)-1-oxopropan-2-yl]amino]-5-oxopentanoic acid 2-azaniumyl-5-[[3-[2-[(4-azaniumyl-5-oxido-5-oxopentanoyl)amino]-3-(carboxymethylamino)-3-oxopropyl]disulfanyl-1-(carboxymethylamino)-1-oxopropan-2-yl]amino]-5-oxopentanoate	2-amino-5-[[3-[2-[(4-amino-5-hydroxy-5-oxopentanoyl)amino]-3-(carboxymethylamino)-3-oxopropyl]disulfanyl-1-(carboxymethylamino)-1-oxopropan-2-yl]amino]-5-oxopentanoic acid 2-amino-5-[[1-[[2-[(4-amino-5-hydroxy-5-oxo-pentanoyl)amino]-3-(carboxymethylamino)-3-oxo-propyl]disulfanylmethyl]-2-(carboxymethylamino)-2-oxo-ethyl]amino]-5-oxo-pentanoic acid 2-amino-5-[[1-[[2-[(4-amino-5-hydroxy-1,5-dioxope…
CCNC(=O)CCC(N)C(O)=O		2-amino-5-ethylamino-5-oxopentanoic acid 2-amino-5-ethylamino-5-oxo-pentanoic acid 2-amino-5-ethylamino-5-keto-valeric acid 3081-61-6 L-Glutamine, N-ethyl- NCGC00095702-01 L-Theanine NSC21308 L-Glutamic acid gamma-(ethylamide) Ngamma-Ethyl-L-glutamine T6576_SIGMA Theanine	3081-61-6
COC(=O)CCC(N)C(O)=O	2-amino-5-methoxy-5-oxopentanoic acid	2-amino-5-methoxy-5-oxopentanoic acid 2-amino-5-methoxy-5-oxo-pentanoic acid 2-amino-5-keto-5-methoxy-valeric acid 1499-55-4 14487-45-7 L-Glutamic acid, 5-methyl ester NSC12959 U 22020 5-Methyl-L-glutamate 5-Methyl DL-glutamate (5)-Methyl L-hydrogen glutamate AI3-52387 EINECS 216-110-9 EINECS 238-494-7
NCC(O)=O	2-Aminoacetic acid carbonocyanidic acid 2-azaniumylacetate	2-Aminoacetic acid carbonocyanidic acid 2-aminoethanoic acid 32817-15-5 33242-26-1 52955-63-2 57678-19-0 63183-41-5 7490-95-1 87867-94-5 25718-94-9 56-40-6 17829-66-2 NCGC00024503-01 G3649_SIGMA Glycine-UL-14C hydrochloride Amitone Polyglycine II Acide aminoacetique [INN-French] G7403_SIGMA InChI=1/C2H5NO2/c3-1-2(4)5/h1,3H2,(H,4,5 50046_FLUKA Glycine, non-medical Acidum aminoaceticum [INN-Latin] …	32817-15-5 33242-26-1 52955-63-2 57678-19-0 63183-41-5 7490-95-1 87867-94-5 25718-94-9 56-40-6 17829-66-2
CCC(N)CO		2-Aminobutan-1-ol 5856-63-3 5856-62-2 96-20-8 13054-87-0 (R)-2-Aminobutan-1-ol 1-Butanol, 2-amino-, (2R)- 1-Butanol, 2-amino-, (R)- 1-Butanol, 2-amino-, (theta)- 2-Amino-1-butanol, (R)- EINECS 227-476-4 1-(Hydroxymethyl)propylamine 1-Butanol, 2-amino- 1-Hydroxy-2-butylamine 2-AMINO-1-BUTANOL 2-Amino-1-hydroxybutane 2-Aminobutyl alcohol Butanol-2-amine NSC1068 WLN: ZY2&1Q (+)-2-Amino-1-butanol EIN…	5856-63-3 5856-62-2 96-20-8 13054-87-0
NCCS(O)=O	2-Aminoethanesulfinic acid	2-Aminoethanesulfinic acid CHEBI:16668 H1384_SIGMA NCGC00024496-01 Tocris-0208 Lopac0_000573 C00519 EU-0100573 Lopac-H-1384 NCGC00015499-01
NCCO		2-aminoethanol 9007-33-4 141-43-5 NChemBio.2007.13-comp20 NCGC00090789-01 07969_FLUKA 2-Hydroxyethylamine Aminoethanol C00189 672130_ALDRICH Aminopolyethylene glycol 5'000 O-(2-Aminoethyl)polyethylene glycol 5000 2-Amino ethanol 02400_FLUKA InChI=1/C2H7NO/c3-1-2-4/h4H,1-3H Etanolamina [Italian] Aminopolyethylene glycol 3'000 O-(2-Aminoethyl)polyethylene glycol 3'000 CHEBI:16000 2-Ethanolamine Env…	9007-33-4 141-43-5
NCCOS(O)(=O)=O	2-Aminoethyl hydrogen sulfate 2-azaniumylethyl sulfate	2-Aminoethyl hydrogen sulfate 926-39-6 2-Aminoethyl sulfuric acid EINECS 213-135-7 Aminoethyl sulfate 2-Aminoethyl sulfate EOS Ethanol, 2-amino-, hydrogen sulfate (ester) Ethanolamine O-sulfate Mono(2-aminoethyl) sulfate NSC3532 2-Aminoethanol, hydrogen sulfate (ester) 2-Aminoethyl hydrogen sulphate AI3-16953 06720_ALDRICH Sulfuric acid mono 2-aminoethylester NSC 204188 NSC 3532 WAS-34 NSC204188 …	926-39-6
Nc1ccccc1O	2-Aminophenol	2-Aminophenol 95-55-6 2AF 2-Hydroxyanaline 2-Aminobenzenol 2-Hydroxyaniline C01987 o-Aminophenol HSDB 4246 NSC 1534 Questiomycin B UN2512 o-Aminophenol [UN2512] [Poison] 1-Amino-2-hydroxybenzene 1-Hydroxy-2-aminobenzene 2-Amino-1-hydroxybenzene BASF URSOL 3GA Benzofur GG C.I. 76520 C.I. Oxidation Base 17 Fouramine OP NSC1534 Nako Yellow 3GA Nako Yellow ga Paradone Olive Green B Pelagol 3GA Pelago…	95-55-6
CCCCCC=CCC=CCCCCCCCC(=O)OCC(C)N	2-aminopropyl (9E,12E)-octadeca-9,12-dienoate	2-aminopropyl (9E,12E)-octadeca-9,12-dienoate (9E,12E)-octadeca-9,12-dienoic acid 2-aminopropyl ester 71685-98-8 EINECS 275-840-6 2-aminopropyl (9Z,12Z)-octadeca-9,12-dienoate	71685-98-8
CCCCOCCc1ccccc1	2-butoxyethylbenzene	2-butoxyethylbenzene 5331-14-6 Benzene, (2-butoxyethyl)- Butyl phenethyl ether NSC2252 (2-Butoxyethyl)benzene AI3-19956 EINECS 226-226-1 NSC 2252 Phenylethyl n-butyl ether	5331-14-6
CCCCN1C(=O)c2ccccc2C1=O	2-butylisoindole-1,3-dione	2-butylisoindole-1,3-dione 2-butylisoindoline-1,3-dione 2-butylisoindoline-1,3-quinone 1515-72-6 N-Butylphthalimide NSC3559 Phthalimide, N-butyl- 1-Phthalimidobutane AI3-02418 EINECS 216-157-5 NSC 3559 ST5307870 Phthalimide, N-butyl- (8CI) N-n-Butylphthalimide ZINC01666841 1H-Isoindole-1,3(2H)-dione, 2-butyl-
CCNc1cc(cc(Cl)c1O)N(=O)=O		2-chloro-6-ethylamino-4-nitrophenol 2-chloro-6-ethylamino-4-nitro-phenol
NC(=O)CCl	2-Chloroacetamide	2-Chloroacetamide 2-Chloroethanamide 79-07-2 NSC54286 ZINC04722803 .alpha.-Chloroacetamide Acetamide, 2-chloro- Chloracetamid Chloracetamide Chloroacetamide Mergal AF Microcide NSC8408 Usaf do-29 WLN: ZV1G 22790_FLUKA ACETIC ACID,CHLORO,AMIDE InChI=1/C2H4ClNO/c3-1-2(4)5/h1H2,(H2,4,5 ST5214005 C0267_SIGMA sJYHCaDIKTp@ 2-Chloracetamide 4-02-00-00490 (Beilstein Handbook Reference) AI3-60133 BRN 0878…
Nc1cc(Cl)c(N)cc1		2-chlorobenzene-1,4-diamine (4-amino-2-chloro-phenyl)amine 141740-59-2 86830-29-7 SBB007575 InChI=1/C6H7ClN2/c7-5-3-4(8)1-2-6(5)9/h1-3H,8-9H 1,4-Benzenediamine, 2-chloro- 1,4-Diamino-2-chlorobenzene 2-CHLORO-P-PHENYLENEDIAMINE 2-Chlor-p-fenylendiamin [Czech] 2-Chloro-(1,4-phenylenediamine) 2-Chloro-1,4-benzenediamine 2-Chloro-1,4-diaminobenzene 2-Chloro-4-phenylenediamine 3-Chlor-p-fenylendiamin …	141740-59-2 86830-29-7
[H]/N=C(/N)\NC#N	2-Cyanoguanidine	2-Cyanoguanidine 125148-58-5 461-58-5 139351-77-2 139351-78-3 157480-33-6 AIDS-103486 AIDS103486 Dicyanadiamide 36600_FLUKA ST5409136 1-Cyanoguanidine Cyanoguanidine Dicyandiamide Dicyanodiamide Guanidine, cyano- N-Cyanoguanidine NSC2031 Pyroset DO InChI=1/C2H4N4/c3-1-6-2(4)5/h(H4,4,5,6 D76609_ALDRICH ACR-H 3636 AI3-14632 Araldite HT 986 Araldite XB 2879B Araldite XB 2979B Bakelite VE 2560 CCRIS …
CCN(CCO)CC	2-Diethylaminoethanol	2-Diethylaminoethanol 102802-00-6 100-37-8 31760_FLUKA AIDS-018580 AIDS018580 471321_ALDRICH NCGC00090925-01 15417_RIEDEL ETHANOL,2-DIETHYLAMINO InChI=1/C6H15NO/c1-3-7(4-2)5-6-8/h8H,3-6H2,1-2H (2-Hydroxyethyl)diethylamine (Diethylamino)ethanol .beta.-(Diethylamino)ethanol .beta.-(Diethylamino)ethyl alcohol 2-(Diethylamino)ethanol 2-(Diethylamino)ethyl alcohol 2-(N,N-Diethylamino)ethanol 2-Hydroxy…	102802-00-6 100-37-8
CN(C)CCO	2-DIMETHYLAMINOETHANOL	2-DIMETHYLAMINOETHANOL 108-01-0 116134-09-9 InChI=1/C4H11NO/c1-5(2)3-4-6/h6H,3-4H2,1-2H 391263_ALDRICH (2-Hydroxyethyl)dimethylamine (Dimethylamino)ethanol .beta.-(Dimethylamino)ethanol .beta.-Dimethylaminoethyl alcohol .beta.-Hydroxyethyldimethylamine 2-(Dimethylamino)-1-ethanol 2-(Dimethylamino)ethanol 2-(N,N-Dimethylamino)ethanol Amietol M 21 Bimanol DIMETHYLAMINOETHANOL DMAE Deanol Dimethyl(2…	108-01-0 116134-09-9
CC(=C)C(=O)OCCN(C)C	2-dimethylaminoethyl 2-methylprop-2-enoate	2-dimethylaminoethyl 2-methylprop-2-enoate 2-methylprop-2-enoic acid 2-dimethylaminoethyl ester 2-methylacrylic acid 2-dimethylaminoethyl ester 114975-29-0 124942-19-4 134946-66-0 141303-14-2 68224-31-7 2867-47-2 135397-44-3 25154-86-3 90803-74-0 234907_ALDRICH Methacrylic acid 2-(dimethylamino)ethyl ester 2-(Dimethylamino)ethyl 2-methyl-2-propenoate 2-Dimethylaminoethyl methacrylate [UN2522] [Po…	114975-29-0 124942-19-4 134946-66-0 141303-14-2 68224-31-7 2867-47-2 135397-44-3 25154-86-3 90803-74-0
CCOCCc1ccccc1	2-ethoxyethylbenzene	2-ethoxyethylbenzene 1817-90-9 (2-Ethoxyethyl)benzene EINECS 217-331-3 NSC 37997 Benzene, (2-ethoxyethyl)- Ethyl phenethyl ether NSC37997	1817-90-9
CCNCCO		2-Ethylaminoethanol 110-73-6 2-(ETHYLAMINO)ETHANOL 2-N-Monoethylaminoethanol AI3-26462 EINECS 203-797-5 Ethanol, 2-(ethylamino)- Ethyl ethanolamine N-Ethylaminoethanol N-Ethylmonoethanolamine 471461_ALDRICH N-Ethylethanolamine InChI=1/C4H11NO/c1-2-5-3-4-6/h5-6H,2-4H2,1H (2-Hydroxyethyl)ethylamine	110-73-6
CCCCC(COC(=O)C(C)(C)C)CC	2-ethylhexyl 2,2-dimethylpropanoate	2-ethylhexyl 2,2-dimethylpropanoate 2,2-dimethylpropanoic acid 2-ethylhexyl ester 2,2-dimethylpropionic acid 2-ethylhexyl ester 16387-18-1 Propanoic acid, 2,2-dimethyl-, 2-ethylhexyl ester 2-Ethylhexyl pivalate EINECS 240-437-6 2,2-Dimethylpropionic acid, 2-ethylhexyl ester
CC(=C)C(=O)OCC(CCCC)CC		2-ethylhexyl 2-methylprop-2-enoate 2-methylprop-2-enoic acid 2-ethylhexyl ester 2-methylacrylic acid 2-ethylhexyl ester 100242-87-3 118955-12-7 153286-32-9 64125-64-0 75577-75-2 94290-92-3 688-84-6 25719-51-1 2-Propenoic acid, 2-methyl-, 2-ethylhexyl ester Methacrylate, 2-ethylisohexy 64072_FLUKA NSC 24173 NSC 32647 2-Ethylhexyl methacryate 4-02-00-01528 (Beilstein Handbook Reference) AI3-03266 2…	100242-87-3 118955-12-7 153286-32-9 64125-64-0 75577-75-2 94290-92-3 688-84-6 25719-51-1
CC(C)C(=O)OCC(CCCC)CC	2-ethylhexyl 2-methylpropanoate	2-ethylhexyl 2-methylpropanoate 2-methylpropanoic acid 2-ethylhexyl ester 2-methylpropionic acid 2-ethylhexyl ester 35061-61-1 Isobutyric acid, 2-ethylhexyl ester 2-Ethylhexyl isobutyrate AI3-21637 EINECS 252-341-1 Propanoic acid, 2-methyl-, 2-ethylhexyl ester	35061-61-1
CCCCC(COC(=O)C=C)CC	2-ethylhexyl prop-2-enoate	2-ethylhexyl prop-2-enoate prop-2-enoic acid 2-ethylhexyl ester acrylic acid 2-ethylhexyl ester 103-11-7 126830-03-3 9003-77-4 126830-02-2 78733-32-1 1322-13-0 93460-77-6 84948-57-2 1-Hexanol, 2-ethyl-, acrylate 2-Ethyl-1-hexyl acrylate 2-Ethylhexyl 2-propenoate 2-Ethylhexyl acrylate 2-Propenoic acid, 2-ethylhexyl ester Acrylic acid, 2-ethylhexyl ester NSC4803 Octyl acrylate WLN: 4Y2 & 1OV1U1 ST5…	103-11-7 126830-03-3 9003-77-4 126830-02-2 78733-32-1 1322-13-0 93460-77-6 84948-57-2
CC(O)(CNC(=O)C(F)(F)F)C(=O)Nc1ccc(c(c1)C(F)(F)F)N(=O)=O		2-hydroxy-2-methyl-N-[4-nitro-3-(trifluoromethyl)phenyl]-3-[(2,2,2-trifluoroacetyl)amino]propanamide 2-hydroxy-2-methyl-N-[4-nitro-3-(trifluoromethyl)phenyl]-3-[(2,2,2-trifluoro-1-oxoethyl)amino]propanamide 2,2,2-trifluoro-N-[2-hydroxy-3-keto-2-methyl-3-[[4-nitro-3-(trifluoromethyl)phenyl]amino]propyl]acetamide 2-hydroxy-2-methyl-N-[4-nitro-3-(trifluoromethyl)phenyl]-3-(2,2,2-trifluoroethanoylami…
OC1=CC=CC=CC1=O	2-hydroxycyclohepta-2,4,6-trien-1-one	2-hydroxycyclohepta-2,4,6-trien-1-one 2-hydroxy-1-cyclohepta-2,4,6-trienone 533-75-5 Tropolone C15474 AIDS-228516 AIDS228516 NSC89303 2-Hydroxy-2,4,6-cycloheptatrien-1-one 93555_FLUKA InChI=1/C7H6O2/c8-6-4-2-1-3-5-7(6)9/h1-5H,(H,8,9 ZINC00392003 NCIMech_000829 NCI60_041986 T89702_ALDRICH 2,4,6-Cycloheptatrien-1-one, 2-hydroxy- 2-Hydroxycyclohepta-2,4,6-trienone 2-Hydroxytropone 4-08-00-00159 (Bei…
C[N+](C)(CCO)CCCNC(=O)C(O)C(O)C(O)C(O)CO	2-hydroxyethyl-dimethyl-[3-(2,3,4,5,6-pentahydroxyhexanoylamino)propyl]azanium	2-hydroxyethyl-dimethyl-[3-(2,3,4,5,6-pentahydroxyhexanoylamino)propyl]azanium 2-hydroxyethyl-dimethyl-[3-(2,3,4,5,6-pentahydroxyhexanoylamino)propyl]ammonium 2-hydroxyethyl-dimethyl-[3-[(2,3,4,5,6-pentahydroxy-1-oxohexyl)amino]propyl]ammonium
NC(=O)NCCO	2-hydroxyethylurea	2-hydroxyethylurea 2078-71-9 1320-51-0 1-Ethanolurea 4-04-00-01545 (Beilstein Handbook Reference) NSC1127 Urea, (2-hydroxyethyl)- Monoethylolurea N-(2-Hydroxyethyl)urea N-(beta-Hydroxyethyl)urea NSC 1127 ZINC01587868 BRN 1098722 T0501-8420 (2-Hydroxyethyl)urea Monoethanolurea 554693_ALDRICH (beta-Hydroxyethyl)urea (Hydroxyethyl)urea EINECS 215-304-0 Urea, (hydroxyethyl)-	2078-71-9 1320-51-0
CC(O)C(N)=O		2-hydroxypropanamide Lactamide 2043-43-8 NSC 61454 NSC 9903 Propanamide, 2-hydroxy- (9CI) alpha-Hydroxypropionamide 292923_ALDRICH DL-Lactamide DL-Lactic acid amide FR-0204 NSC61454 .alpha.-Hydroxypropionamide 2-Hydroxypropionamide Lactic acid amide Lactic amide NSC9903 Propanamide, 2-hydroxy- STK045828 ARONIS002233 EINECS 218-049-3	2043-43-8
NCCS(=O)(=O)S	2-hydroxysulfonothioylethanamine	2-hydroxysulfonothioylethanamine 2-hydroxysulfonothioylethylamine 2937-54-4 31999-89-0 2-Aminoethanethiosulfonic acid EINECS 220-918-7 Thiotaurine	2937-54-4 31999-89-0
COC(C)Oc1ccc(CC=C)cc1OC		2-methoxy-1-(1-methoxyethoxy)-4-prop-2-enylbenzene 4-allyl-2-methoxy-1-(1-methoxyethoxy)benzene 2-methoxy-1-(1-methoxyethoxy)-4-prop-2-enyl-benzene 68213-85-4 4-Allyl-2,alpha-dimethoxyphenetole Benzene, 2-methoxy-1-(1-methoxyethoxy)-4-(2-propenyl)- EINECS 269-268-6	68213-85-4
COc1ccccc1C=O	2-Methoxybenzaldehyde	2-Methoxybenzaldehyde 135-02-4 2-Methoxyphenylformaldehyde 4-08-00-00180 (Beilstein Handbook Reference) AI3-01375 BRN 0606301 EINECS 205-171-7 Formylanisole, o- NSC 58960 Salicylaldehyde methyl ether 64770_FLUKA 109622_ALDRICH ST5213390 InChI=1/C8H8O2/c1-10-8-5-3-2-4-7(8)6-9/h2-6H,1H 2-Anisaldehyde 2-Methoxybenzenecarboxaldehyde 6-Methoxybenzaldehyde Benzaldehyde, 2-methoxy- Benzaldehyde, o-metho…	135-02-4
COc1cc(N)ccc1N	2-methoxybenzene-1,4-diamine	2-methoxybenzene-1,4-diamine (4-amino-2-methoxy-phenyl)amine 5307-02-8 1,4-Benzenediamine, 2-methoxy- 2,5-Diaminoanisole 2-METHOXY-1,4-BENZENEDIAMINE 2-Methoxy-p-phenylenediamine 2-Mppd 4-13-00-01431 (Beilstein Handbook Reference) BRN 2803125 CCRIS 1980 EINECS 226-161-9 HSDB 6250 p-Diaminoanisole p-Phenylenediamine, 2-methoxy- ZINC04807288	5307-02-8
COCCO		2-Methoxyethanol 109-86-4 102868-77-9 104841-59-0 12623-96-0 126966-17-4 134919-42-9 138753-86-3 142172-77-8 146162-92-7 154701-70-9 154885-26-4 158360-78-2 162582-19-6 163294-10-8 163733-28-6 165338-17-0 166441-82-3 178613-33-7 185250-24-2 187523-66-6 189209-93-6 193008-24-1 195970-98-0 207799-14-2 212969-32-9 216693-45-7 41396-14-9 54386-07-1 57244-93-6 64543-87-9 69592-91-2 72664-19-8 77102-87…	109-86-4 102868-77-9 104841-59-0 12623-96-0 126966-17-4 134919-42-9 138753-86-3 142172-77-8 146162-92-7 154701-70-9 154885-26-4 158360-78-2 162582-19-6 163294-10-8 163733-28-6 165338-17-0 166441-82-3 178613-33-7 185250-24-2 187523-66-6 189209-93-6 193008-24-1 195970-98-0 207799-14-2 212969-32-9 216693-45-7 41396-14-9 54386-07-1 57244-93-6 64543-87-9 69592-91-2 72664-19-8 77102-87-5 86002-19-9 900…
COCCc1ccccc1		2-methoxyethylbenzene 3558-60-9 .beta.-Phenylethyl methyl ether 2-Phenylethyl methyl ether Benzene, (2-methoxyethyl)- Ether, methyl phenethyl Methyl 2-phenethyl ether Methyl phenethyl ether Methyl phenethyl oxide Methyl phenylethyl ether NSC81229 Phenylethyl methyl ether (2-Methoxyethyl)benzene 1-Methoxy-2-phenylethane 2-Phenethyl methyl ether 4-06-00-03069 (Beilstein Handbook Reference) BRN 1857…
COc1cc2ccccc2cc1		2-Methoxynaphthalene 93-04-9 Nerolin Yara Yara W525308_ALDRICH .beta.-Methoxynaphthalene .beta.-Naphthol methyl ether .beta.-Naphthyl methyl ether 2-Naphthol methyl ether 2-Naphthyl methyl ether Methyl .beta.-naphthyl ether Methyl 2-naphthyl ether NSC4171 Naphthalene, 2-methoxy- Nerolin (old) Yara yara Yara-Yara Yura yara InChI=1/C11H10O/c1-12-11-7-6-9-4-2-3-5-10(9)8-11/h2-8H,1H 148245_ALDRICH ZI…	93-04-9
CC(C)(CS(O)(=O)=O)NC(=O)C=C	2-methyl-2-(prop-2-enoylamino)propane-1-sulfonic acid	2-methyl-2-(prop-2-enoylamino)propane-1-sulfonic acid 2-methyl-2-(1-oxoprop-2-enylamino)propane-1-sulfonic acid 2-acrylamido-2-methyl-propane-1-sulfonic acid 201849-71-0 201849-72-1 201849-73-2 201849-74-3 27119-07-9 60474-89-7 88528-38-5 82989-71-7 155380-40-8 107240-62-0 114705-58-7 127889-32-1 2-Acrylamido-2-methylpropanesulfonic acid 2-Acrylamido-2-methylpropanesulfonate ST5307457 2-(acryloyl…	201849-71-0 201849-72-1 201849-73-2 201849-74-3 27119-07-9 60474-89-7 88528-38-5 82989-71-7 155380-40-8 107240-62-0 114705-58-7 127889-32-1
CC1NCCC(N=1)C(O)=O	2-methyl-3,4,5,6-tetrahydropyrimidine-4-carboxylic acid	2-methyl-3,4,5,6-tetrahydropyrimidine-4-carboxylic acid 96702-03-3 117305-84-7 1,4,5,6-tetrahydro-2-methyl-4-pyrimidine carboxylic acid ECTOINE NSC614616 4-Pyrimidinecarboxylic acid, 1,4,5,6-tetrahydro-2-methyl-, (+)- 4-Pyrimidinecarboxylic acid, 1,4,5,6-tetrahydro-2-methyl- 2-Methyl-4-carboxy-3,4,5,6-tetrahydropyrimidine Thp(B)	96702-03-3 117305-84-7
CC1C(=O)CCC=1CC=CCC	2-methyl-3-[(E)-pent-2-enyl]cyclopent-2-en-1-one	2-methyl-3-[(E)-pent-2-enyl]cyclopent-2-en-1-one 2-methyl-3-[(E)-pent-2-enyl]-1-cyclopent-2-enone 11050-62-7 39346-90-2 8029-70-7 2-Cyclopenten-1-one, 2-methyl-3-(2-pentenyl)- 2-Methyl-3-(2-pentenyl)-2-cyclopenten-1-one 2-Methyl-3-pent-2-enylcyclopent-2-enone EINECS 234-273-4 FEMA No. 3552 Isojasmone Isojasmone (natural)
CNCC(O)=O	2-methylaminoacetic acid 2-methylazaniumylacetate	2-methylaminoacetic acid 2-Methylaminoethanoic acid 783292-49-9 25951-24-0 107-97-1 CHEBI:15611 84529_FLUKA AIDS-018622 AIDS018622 (Methylamino)acetic acid (Methylamino)ethanoic acid 4-04-00-02363 (Beilstein Handbook Reference) AI3-15410 Acetic acid, (methylamino)- BRN 1699442 EINECS 203-538-6 Glycine, N-methyl- Methylglycine N-Methylaminoacetic acid Sarcosin Sarcosinic acid Cocobetaine Cocoyl sa…	783292-49-9 25951-24-0 107-97-1
CNCCO		2-Methylaminoethanol 109-83-1 (2-Hydroxyethyl)methylamine (Hydroxyethyl)methylamine .beta.-(Methylamino)ethanol 2-(Methylamino)ethanol 2-(N-Methylamino)ethanol 2-(N-Monomethylamino)ethanol 2-Hydroxy-N-methylethylamine Amietol M 11 Ethanol, 2-(methylamino)- METHLAMINOETHANOL Methyl(.beta.-hydroxyethyl)amine Methyl(2-hydroxyethyl)amine Methyl(hydroxyethyl)amine Methylaminoethanol Methylethanolamine…	109-83-1
Cc1cc(N)ccc1N		2-methylbenzene-1,4-diamine (4-amino-2-methyl-phenyl)amine 62488-19-1 25376-45-8 124688-01-3 156031-30-0 33379-31-6 para-Toluenediamine para-Toluylenediamine para-Tolylenediamine ZINC00388337 1,4-Benzenediamine, 2-methyl- 2,5-Diaminotoluene 2,5-Toluenediamine 2-METHYL-1,4-BENZENEDIAMINE 2-Methyl-para-phenylenediamine 4-13-00-00246 (Beilstein Handbook Reference) 4-Amino-2-methylaniline BRN 0774521…	62488-19-1 25376-45-8 124688-01-3 156031-30-0 33379-31-6
CCCC(=O)OCC(C)CC	2-methylbutyl butanoate	2-methylbutyl butanoate butanoic acid 2-methylbutyl ester butyric acid 2-methylbutyl ester 51115-64-1 2-Methylbutyl butyrate AI3-33702 Butanoic acid, 2-methylbutyl ester EINECS 256-973-9
CCCCC(C)C(O)=O	2-METHYLHEXANOIC ACID	2-METHYLHEXANOIC ACID 104490-70-2 22160-12-9 Hexanoic acid, 2-methyl- Methylhexanoic acid alpha-Methylcaproic acid W319104_ALDRICH Hexanoic acid, methyl- 338273_ALDRICH .alpha.-Methylcaproic acid LMFA01020080 2-methyl-hexanoic acid 67435_FLUKA 2-Hexanecarboxylic acid 2-Methylcaproic acid 4-02-00-00969 (Beilstein Handbook Reference) BRN 1721227 EINECS 224-883-9 FEMA No. 3191
CCCC(C)C(O)=O	2-Methylpentanoic acid	2-Methylpentanoic acid 2-Methylvaleric acid 22160-39-0 97-61-0 .alpha.-Methylvaleric acid 2-Pentanecarboxylic acid Methylpropylacetic acid NSC8406 Pentanoic acid, 2-methyl- Valeric acid, 2-methyl- WLN: QVY3 & 1 69643_FLUKA 2-methyl valeric acid 2-methyl-pentanoic acid LMFA01020074 ()-2-Methylvaleric acid W275409_ALDRICH 4-02-00-00942 (Beilstein Handbook Reference) AI3-26042 BRN 1720655 EINECS 202…
CC(=C)C(O)=O	2-methylprop-2-enoic acid	2-methylprop-2-enoic acid Methacrylic acid 115708-68-4 463311-95-7 79-41-4 2-Methylenepropionic acid 4-02-00-01518 (Beilstein Handbook Reference) AI3-15724 Acide methacrylique [French] Acido metacrilico [Spanish] BRN 1719937 CCRIS 5925 EINECS 201-204-4 HSDB 2649 Kyselina methakrylova [Czech] Methacrylic acid, inhibited [UN2531] [Corrosive] NSC 7393 Propenoic acid, 2-methyl UN2531 alpha-Methylacry…	115708-68-4 463311-95-7 79-41-4
CC(C)C	2-Methylpropane	2-Methylpropane ISOBUTANE 75-28-5 100494-20-0 70357-15-2 CHEBI:30363 D04623 1,1-Dimethylethane A 31 (hydrocarbon) Caswell No. 503A EINECS 200-857-2 EPA Pesticide Chemical Code 097101 HSDB 608 Propane, 2-methyl- R 600a Trimethylmethane Isobutane (NF) 295450_ALDRICH 539821_ALDRICH (CH3)2CH-CH3
CC(=CC)C(=O)OCC(C)C	2-methylpropyl (E)-2-methylbut-2-enoate 2-methylpropyl 2-methylbut-2-enoate	2-methylpropyl (E)-2-methylbut-2-enoate 2-methylpropyl 2-methylbut-2-enoate isobutyl (E)-2-methylbut-2-enoate isobutyl 2-methylbut-2-enoate (E)-2-methylbut-2-enoic acid isobutyl ester 2-methylbut-2-enoic acid isobutyl ester 61692-84-0 2-Butenoic acid, 2-methyl-, 2-methylpropyl ester, (2E)- 2-Butenoic acid, 2-methyl-, 2-methylpropyl ester, (E)- Isobutyl angelate EINECS 262-908-5 Isobutyl 2-methylc…	61692-84-0
CNc1ccccc1C(=O)OCC(C)C	2-methylpropyl 2-methylaminobenzoate	2-methylpropyl 2-methylaminobenzoate isobutyl 2-methylaminobenzoate 2-methylaminobenzoic acid isobutyl ester 65505-24-0 2-Methylpropyl 2-(methylamino)benzoate 2-Methylpropyl 2-N-methylaminobenzoate Benzoic acid, 2-(methylamino)-, 2-methylpropyl ester EINECS 265-798-7 Isobutyl 2-(methylamino)benzoate Isobutyl 2-N-methylaminobenzoate Isobutyl N-methylanthranilate iso-Butyl N-methyl anthranilate
CC(C)COC(=O)C(C)CC	2-methylpropyl 2-methylbutanoate	2-methylpropyl 2-methylbutanoate isobutyl 2-methylbutanoate 2-methylbutanoic acid isobutyl ester 2-methylbutyric acid isobutyl ester 2445-67-2 Butyric acid, 2-methyl-, isobutyl ester AI3-33627 Butanoic acid, 2-methyl-, 2-methylpropyl ester EINECS 219-492-5 Isobutyl 2-methylbutyrate	2445-67-2
CC(=C)C(=O)OCC(C)C	2-methylpropyl 2-methylprop-2-enoate	2-methylpropyl 2-methylprop-2-enoate isobutyl 2-methylprop-2-enoate 2-methylprop-2-enoic acid isobutyl ester 2-methylacrylic acid isobutyl ester 266675-13-2 97-86-9 2-Methylpropyl 2-methyl-2-propenoate 4-02-00-01526 (Beilstein Handbook Reference) BRN 1747595 CCRIS 4829 EINECS 202-613-0 HSDB 5312 Isobutyl alpha-methacrylate Isobutyl alpha-methylacrylate Isobutyl methacrylate, inhibited [UN2283] [F…	266675-13-2 97-86-9
CC(C)C(=O)OCC(C)C	2-Methylpropyl 2-methylpropanoate	2-Methylpropyl 2-methylpropanoate Isobutyl 2-methylpropanoate 2-methylpropanoic acid isobutyl ester 2-methylpropionic acid isobutyl ester 97-85-8 NSC 6538 UN2528 2-Methylpropyl 2-methylpropionate 2-Methylpropyl isobutyrate Isobutyl isobutanoate Isobutyl isobutyrate Isobutyric acid, isobutyl ester NSC6538 Propanoic acid, 2-methyl-, 2-methylpropyl ester WLN: 1Y1 & VO1Y1 & 1 ZINC00391110 InChI=1/C8H…	97-85-8
CC(C)COC(=O)Cc1ccccc1	2-methylpropyl 2-phenylacetate	2-methylpropyl 2-phenylacetate isobutyl 2-phenylacetate 2-phenylacetic acid isobutyl ester 2-methylpropyl 2-phenylethanoate 102-13-6 CCRIS 7324 EINECS 203-007-9 FEMA No. 2210 Isobutyl alpha-toluate NSC 6602 Acetic acid, phenyl-, isobutyl ester Benzeneacetic acid, 2-methylpropyl ester Isobutyl .alpha.-toluate Isobutyl phenylacetate Isobutyl phenylethanoate NSC6602 Phenylacetic acid, isobutyl ester…	102-13-6
CC(C)COC(=O)CCc1ccco1	2-methylpropyl 3-furan-2-ylpropanoate	2-methylpropyl 3-furan-2-ylpropanoate Isobutyl 3-(2-furyl)propanoate 3-(2-furyl)propanoic acid isobutyl ester 3-(2-furyl)propionic acid isobutyl ester 105-01-1 2-FURANPROPIONIC ACID, ISOBUTYL ESTER 2-Furanpropanoic acid, 2-methylpropyl ester 2-Methylpropyl 2-furanpropanoate BRN 4991049 EINECS 203-261-0 FEMA No. 2198 Isobutyl 2-furanpropionate Isobutyl 3-(2-furan)propionate Isobutyl furan-2-propio…	105-01-1
CC(C)COC(=O)CC(C)C	2-Methylpropyl 3-methylbutanoate	2-Methylpropyl 3-methylbutanoate isobutyl 3-methylbutanoate 3-methylbutanoic acid isobutyl ester 3-methylbutyric acid isobutyl ester 589-59-3 Isobutyl isovalerate AI3-33586 Isobutylisovalerate EINECS 209-653-8 2-Methylpropyl 3-methylbutyrate 2-Methylpropyl isovalerate Butanoic acid, 3-methyl-, 2-methylpropyl ester Isobutyl 3-methylpropanoate Isovaleric acid, isobutyl ester NSC6993 WLN: 1Y1&1VO1Y1…	589-59-3
CC(C)COC(C)=O	2-Methylpropyl acetate	2-Methylpropyl acetate Isobutyl acetate acetic acid isobutyl ester 2-Methylpropyl ethanoate 110-19-0 537470_SIAL .beta.-Methylpropyl ethanoate 2-Methyl-1-propyl acetate Acetate d'isobutyle Acetic acid, 2-methylpropyl ester Acetic acid, isobutyl ester Isobutyl ethanoate NSC8035 WLN: 1Y1 & 1OV1 ZINC00388187 InChI=1/C6H12O2/c1-5(2)4-8-6(3)7/h5H,4H2,1-3H 94823_FLUKA W217506_ALDRICH W217514_ALDRICH 4-…
CC(C)COC=O	2-Methylpropyl formate	2-Methylpropyl formate Isobutyl formate formic acid isobutyl ester 2-methylpropyl methanoate 542-55-2 158658_ALDRICH ZINC01867146 Formic acid, 2-methylpropyl ester Formic acid, isobutyl ester Isobutyl methanoate NSC6968 Tetryl formate WLN: VHO1Y1&1 InChI=1/C5H10O2/c1-5(2)3-7-4-6/h4-5H,3H2,1-2H 2-Methyl-1-propyl formate 4-02-00-00029 (Beilstein Handbook Reference) AI3-24240 BRN 1738888 EINECS 208-…	542-55-2
CCCCCC(=O)OCC(C)C	2-METHYLPROPYL HEXANOATE	2-METHYLPROPYL HEXANOATE Isobutyl hexanoate hexanoic acid isobutyl ester 105-79-3 AI3-24254 EINECS 203-332-6 FEMA No. 2202 Hexanoic acid, 2-methylpropyl ester Hexanoic acid, isobutyl ester Isobutyl caproate Isobutyl caproate (natural) W220205_ALDRICH W220213_ALDRICH 2-Methyl-1-propyl caproate	105-79-3
CCC(=O)OCC(C)C	2-METHYLPROPYL PROPANOATE	2-METHYLPROPYL PROPANOATE Isobutyl propanoate propanoic acid isobutyl ester propionic acid isobutyl ester 540-42-1 FEMA No. 2212 307580_ALDRICH Isobutyl propionate (natural) 2-Methyl-1-propyl propanoate Isobutyl propionate [UN2394] [Flammable liquid] 2-Methylpropyl propionate Isobutyl propionate NSC8450 Propanoic acid, 2-methylpropyl ester Propionic acid, isobutyl ester WLN: 2VO1Y1&1 NSC 8450 InC…	540-42-1
Nc1cc(c(cc1)Nc1ccccc1)N(=O)=O	2-Nitro-N-phenylbenzene-1,4-diamine	2-Nitro-N-phenylbenzene-1,4-diamine 2-nitro-N-phenyl-benzene-1,4-diamine (4-amino-2-nitro-phenyl)-phenyl-amine 2784-89-6 1,4-Benzenediamine, 2-nitro-N(sup 1)-phenyl- 1,4-Benzenediamine, 2-nitro-N1-phenyl- 2-Nitro-4-aminodiphenylamine 2-Nitro-N'-phenyl-1,4-benzenediamine 2-Nitro-N(sup 1)-phenyl-1,4-benzenediamine 2-Nitro-N1-phenyl-1,4-benzenediamine 4-Amino-2-nitrodiphenylamine EINECS 220-494-3 HC…	2784-89-6
CCCCCC1=CCCC1=O		2-Pentylcyclopent-2-en-1-one 2-pentyl-1-cyclopent-2-enone 2-amylcyclopent-2-en-1-one 25564-22-1 BB_NC-0256 EINECS 247-104-4 2-Cyclopenten-1-one, 2-pentyl- 2-Pentyl-2-cyclopenten-1-one 4-07-00-00195 (Beilstein Handbook Reference) Amyl cyclopentenone BRN 1857975 365343_ALDRICH ZINC02077861
OC(=O)Cc1ccccc1	2-Phenylacetic acid	2-Phenylacetic acid 2-Phenylethanoic acid 103-82-2 51146-16-8 CHEBI:30745 .alpha.-Toluic acid NCI60_002571 .omega.-Phenylacetic acid NSC125718 AIDS-017618 AIDS017618 NSC139637 PAA Benzeneacetiic acid Benzylformic acid C07086 Phenylacetic acid W287814_ALDRICH P6061_SIGMA PAC alpha-Tolylic acid NCI60_000596 InChI=1/C8H8O2/c9-8(10)6-7-4-2-1-3-5-7/h1-5H,6H2,(H,9,10 PHENYL-ACETIC ACID W287806_ALDRICH …
O=C(S)Cc1ccccc1		2-phenylethanethioic S-acid 2-phenylthioacetic acid AI3-26091 EINECS 203-073-9 NSC 9582 PHENYLTHIOACETIC ACID Phenyl thioacetic acid Phenylthioacetate
CC=CC(=O)OCCc1ccccc1	2-phenylethyl (E)-but-2-enoate 2-phenylethyl but-2-enoate	2-phenylethyl (E)-but-2-enoate 2-phenylethyl but-2-enoate but-2-enoic acid 2-phenylethyl ester (E)-but-2-enoic acid 2-phenylethyl ester 68141-20-8 6289-54-9 2-Phenethyl crotonate 2-Butenoic acid, 2-phenylethyl ester, (E)- 2-Butenoic acid, 2-phenylethyl ester, (2E)- 2-Butenoic acid, 2-phenylethyl ester 2-Phenylethyl crotonate NSC 5683 2-Phenylethyl trans-2-butenoate EINECS 268-842-3 NSC5683 Phenet…
CC(C)(C)C(=O)OCCc1ccccc1	2-phenylethyl 2,2-dimethylpropanoate	2-phenylethyl 2,2-dimethylpropanoate 2,2-dimethylpropanoic acid 2-phenylethyl ester 2,2-dimethylpropionic acid 2-phenylethyl ester 67662-96-8 Phenethyl pivalate Phenylethyl trimethylacetate Propanoic acid, 2,2-dimethyl-, 2-phenylethyl ester AI3-34502 EINECS 266-841-2
Nc1ccccc1C(=O)OCCc1ccccc1		2-Phenylethyl 2-aminobenzoate 2-aminobenzoic acid 2-phenylethyl ester 133-18-6 Benzyl carbinyl anthranilate W285900_ALDRICH AI3-36132 CCRIS 4695 EINECS 205-098-0 FEMA No. 2859 NSC 66441 beta-Phenethyl o-aminobenzoate beta-Phenethyl-o-aminobenzoate .beta.-Phenethyl-o-aminobenzoate 2-Phenylethyl anthranilate 2-Phenylethyl o-aminobenzoate 2-Phenylethyl-o-aminobenzoate Anthranilic acid, phenethyl est…
O=C(Cc1ccccc1)OCCc1ccccc1	2-phenylethyl 2-phenylacetate	2-phenylethyl 2-phenylacetate 2-phenylacetic acid 2-phenylethyl ester 2-phenylethyl 2-phenylethanoate 102-20-5 56961-74-1 Phenethyl alpha-toluate .beta.-Phenylethyl phenylacetate 2-Phenylethyl .alpha.-toluate 2-Phenylethyl phenylacetate Acetic acid, phenyl-, phenethyl ester Benzeneacetic acid, 2-phenylethyl ester Benzylcarbinyl .alpha.-toluate NSC6676 Phenethyl .alpha.-toluate Phenethyl phenylace…	102-20-5 56961-74-1
CC(C)CC(=O)OCCc1ccccc1	2-Phenylethyl 3-methylbutanoate	2-Phenylethyl 3-methylbutanoate 3-methylbutanoic acid 2-phenylethyl ester 3-methylbutyric acid 2-phenylethyl ester 140-26-1 Benzylcarbinyl isopentanoate Benzylcarbinyl isovalerate EINECS 205-406-3 FEMA No. 2871 NSC 21899 Phenethyl 3-methylbutyrate Phenethyl isovalerate (natural) Phenethyl isovalerianate Phenylethyl 3-methylbutyrate Phenylethyl isovalerate .beta.-Phenylethyl isovalerate Butanoic a…	140-26-1
CC(=O)OCCc1ccccc1	2-Phenylethyl acetate	2-Phenylethyl acetate acetic acid 2-phenylethyl ester 2-phenylethyl ethanoate 103-45-7 46030_FLUKA Phenylethyl acetate 290580_ALDRICH NCIOpen2_000347 C12303 (2-PHENYLETHYL)ACETATE 4-06-00-03073 (Beilstein Handbook Reference) AI3-03878 BRN 0638179 EINECS 203-113-5 FEMA No. 2857 NSC 71927 Phenethyl acetate (natural) Phenethyl alcohol, acetate beta-Phenylethyl acetate NSC71927 ZINC00388671 ST5405467…
CCCC(=O)OCCc1ccccc1	2-Phenylethyl butanoate	2-Phenylethyl butanoate butanoic acid 2-phenylethyl ester butyric acid 2-phenylethyl ester 103-52-6 Benzylcarbinyl butyrate Butanoic acid, 2-phenylethyl ester Butyric acid, phenethyl ester NSC1271 Phenethyl butyrate Phenylethyl butyrate .beta.-Phenylethyl butyrate NSC406207 W286109_ALDRICH beta-Phenethyl n-butanoate Phenethyl butyrate (natural) InChI=1/C12H16O2/c1-2-6-12(13)14-10-9-11-7-4-3-5-8-1…	103-52-6
CCC(=O)OCCc1ccccc1		2-Phenylethyl propanoate propanoic acid 2-phenylethyl ester propionic acid 2-phenylethyl ester 122-70-3 Phenylethanol propanoate W286702_ALDRICH 2-Phenethyl propionate 2-Phenethylpropionate 2-Phenylethyl propionate 3-06-00-01709 (Beilstein Handbook Reference) AI3-18544 BRN 2097455 Benzylcarbinyl propionate Caswell No. 655D EINECS 204-567-7 ENT 18544 EPA Pesticide Chemical Code 102601 EcoPCO ACU F…	122-70-3
C(Cc1ccccc1)c1ccccc1	2-phenylethylbenzene	2-phenylethylbenzene 39660-70-3 103-29-7 B33706_ALDRICH NSC30686 ghl.PD_Mitscher_leg0.651 AB-131/40879352 C14685 1,1'-ethane-1,2-diyldibenzene InChI=1/C14H14/c1-3-7-13(8-4-1)11-12-14-9-5-2-6-10-14/h1-10H,11-12H 1,2-Diphenylethane 1,2-Diphenylethane, s Benzene, 1,1'-(1,2-ethanediyl)bis- Bibenzyl Dibenzil Dibenzyl Diphenylethylene Ethane, 1,2-diphenyl- NSC8789 WLN: R2R s-Diphenylethane ST5406346 14…	39660-70-3 103-29-7
Oc1ccccc1-c1ccccc1	2-Phenylphenol	2-Phenylphenol 90-43-7 192076-92-9 61788-42-9 39387-78-5 c0269 (1,1'-Biphenyl)-2-ol 2-Fenylfenol [Czech] 2-Hydroxybifenyl [Czech] 2-Phenyl phenol 2-Phenylphenol [BSI:ISO] 4-06-00-04579 (Beilstein Handbook Reference) AI3-00062 Anthrapole 73 BRN 0606907 Biphenyl-2-o1 CCRIS 1388 Caswell No. 623AA o-Hydroxydiphenyl EINECS 201-993-5 EPA Pesticide Chemical Code 064103 HSDB 1753 Invalon OP Kiwi lustr 27…	90-43-7 192076-92-9 61788-42-9 39387-78-5
CC(C=O)c1ccccc1	2-Phenylpropanal	2-Phenylpropanal 2-Phenylpropionaldehyde 93-53-8 1340-11-0 34713-70-7 alpha-Phenylpropionaldehyde alpha-Tolualdehyde, alpha-methyl- alpha-Methyltolualdehyde W288608_ALDRICH alpha-Methylbenzeneacetaldehyde 241369_ALDRICH FR-0124 53790_FLUKA alpha-Methylbenzenealdehydealpha- SBB007693 alpha-Methylphenylacetaldehyde 2-Fenyl-1-propanal [Czech] 2-Phenyl propionaldehyde 2-Phenyl-1-propanal AI3-02934 Al…
CC(=O)OCC(C)c1ccccc1		2-Phenylpropyl acetate acetic acid 2-phenylpropyl ester 2-phenylpropyl ethanoate 50373-50-7 10402-52-5 144939-28-6 Benzeneethanol, beta-methyl-, acetate EINECS 233-871-2 Hydratropic acetate Hydratropyl acetate NSC 190972 PHENETHYL ALCOHOL, beta-METHYL-, ACETATE beta-Methylphenylethyl acetate ST5444483 Benzeneethanol, .beta.-methyl-, acetate NSC190972 (S)-beta-Methylphenethyl acetate EINECS 256-55…	50373-50-7 10402-52-5 144939-28-6
C=CCOCCc1ccccc1	2-prop-2-enoxyethylbenzene	2-prop-2-enoxyethylbenzene 2-allyloxyethylbenzene 14289-65-7 Ether, allyl phenethyl NSC70009 Allyl phenethyl ether Allyl phenylethyl ether Benzene, (2-(2-propenyloxy)ethyl)- EINECS 238-212-2 Ether, allyl phenethyl (8CI) NSC 70009 Allyl-1-phenylethyl(2)ether	14289-65-7
CC(S)C(O)=O	2-sulfanylpropanoic acid	2-sulfanylpropanoic acid 2-Mercaptopropanoic acid 2-Mercaptopropionic acid 71563-86-5 4-03-00-00682 (Beilstein Handbook Reference) BRN 0506218 EINECS 201-206-5 FEMA No. 3180 PROPANOIC ACID, 2-MERCAPTO- Propionic acid, 2-mercapto- Thiolactic acid Thiolactic acid [UN2936] [Poison] UN2936 alpha-Mercaptopropanoic acid alpha-Mercaptopropionic acid W318000_ALDRICH CHEBI:47872 88880_FLUKA T31003_ALDRICH…	71563-86-5
COc1ccc(cc1C(C)(C)C)OC	2-tert-Butyl-1,4-dimethoxybenzene	2-tert-Butyl-1,4-dimethoxybenzene 2-tert-butyl-1,4-dimethoxy-benzene 21112-37-8 Benzene, 2-(1,1-dimethylethyl)-1,4-dimethoxy- Benzene, 2-tert-butyl-1,4-dimethoxy- Dimethoxy-1,4-tert-butyl-2-benzene EINECS 244-216-5	21112-37-8
C[N+](C)(C)CC([O-])=O	2-trimethylazaniumylacetate	2-trimethylazaniumylacetate 2-trimethylammonioacetate 2-trimethylazaniumylethanoate 11042-12-9 24980-93-6 45631-77-4 590-30-7 107-43-7 Rubrine C Trimethylaminoacetic acid Trimethylglycine Trimethylglycocoll alpha-Earleine N,N,N-trimethylammonioacetate 14290_FLUKA B2629_SIGMA (Carboxymethyl)trimethylammonium hydroxide inner salt CHEBI:17750 .beta.ine Loramine AMB-13 NSC166511 WLN: QV1K1 & 1 & 1 & …	11042-12-9 24980-93-6 45631-77-4 590-30-7 107-43-7
CC(Cc1ccc2OCOc2c1)C=O		3-(1,3-benzodioxol-5-yl)-2-methylpropanal 3-(1,3-benzodioxol-5-yl)-2-methyl-propanal 3-(1,3-benzodioxol-5-yl)-2-methyl-propionaldehyde 1205-17-0 2-Methyl-3-(3,4-methylenedioxyphenyl)-propanal W523909_ALDRICH .alpha.-Methyl-3,4-methylenedioxy-hydrocinnamic aldehyde 1,3-Benzodioxole-5-propanal, .alpha.-methyl- Hydrocinnamaldehyde, .alpha.-methyl-3,4-(methylenedioxy)- NSC22282 STOCK2S-10456 1,3-Benz…	1205-17-0
CC(C)CCCCCCCCCCCCCCC(=O)NC(CC)C(C([O-])=O)[N+](C)(C)C		3-(16-methylheptadecanoylamino)-2-trimethylazaniumylpentanoate 3-(16-methylheptadecanoylamino)-2-trimethylammonio-pentanoate 3-[(16-methyl-1-oxoheptadecyl)amino]-2-trimethylammoniopentanoate 3-(16-methylheptadecanoylamino)-2-trimethylammonio-valerate 3-(16-methylheptadecanoylamino)-2-trimethylazaniumyl-pentanoate
CCOC(C)OC(C)(CCC=C(C)C)C=C		3-(1-Ethoxyethoxy)-3,7-dimethylocta-1,6-diene 3-(1-ethoxyethoxy)-3,7-dimethyl-octa-1,6-diene 1-(1,5-dimethyl-1-vinyl-hex-4-enoxy)ethoxyethane 40910-49-4 Acetaldehyde linalyl ethyl acetal 1 1,6-Octadiene, 3,7-dimethyl-3-(1-ethoxyethoxy)- 1,6-Octadiene, 3-(1-ethoxyethoxy)-3,7-dimethyl- 1-Ethoxy-1-linalyloxethane 3,7-Dimethyl-3-(1-ethoxyethoxy)-1,6-octadiene Acetaldehyde ethyl linalyl acetal BRN 308…	40910-49-4
OC(=O)CCSCCC(O)=O	3-(2-carboxyethylsulfanyl)propanoic acid	3-(2-carboxyethylsulfanyl)propanoic acid 3-(2-carboxyethylthio)propanoic acid 3-(2-carboxyethylthio)propionic acid 111-17-1 NCIOpen2_002942 ST5307952 .beta.,.beta.'-Thiodipropionic acid 3,3'-Thiodipropionic acid 4-Thiaheptanedioic acid Bis(2-carboxyethyl) sulfide Diethyl sulfide 2,2'-dicarboxylic acid Kyselina .beta.,.beta.'-thiodipropionova NSC8166 Propanoic acid, 3,3'-thiobis- Propionic acid, 3…	111-17-1
CCc1ccccc1CC(C)(C)C=O	3-(2-ethylphenyl)-2,2-dimethylpropanal	3-(2-ethylphenyl)-2,2-dimethylpropanal 3-(2-ethylphenyl)-2,2-dimethyl-propanal 3-(2-ethylphenyl)-2,2-dimethyl-propionaldehyde 67634-14-4 3-(o-Ethylphenyl)-2,2-dimethylpropionaldehyde Benzenepropanal, 2-ethyl-alpha,alpha-dimethyl- EINECS 266-818-7 para-Ethyl-alpha,alpha-dimethyl-hydrocinnamaldehyde	67634-14-4
CC(O)C(=O)NCCC[N+](C)(C)C	3-(2-hydroxypropanoylamino)propyl-trimethylazanium	3-(2-hydroxypropanoylamino)propyl-trimethylazanium 3-(2-hydroxypropanoylamino)propyl-trimethyl-ammonium 3-[(2-hydroxy-1-oxopropyl)amino]propyl-trimethylammonium 3-lactamidopropyl-trimethyl-ammonium 3-(2-hydroxypropanoylamino)propyl-trimethyl-azanium
COCCOCCC[Si](C)(O[Si](C)(C)C)O[Si](C)(C)C		3-(2-methoxyethoxy)propyl-methyl-bis(trimethylsilyloxy)silane 150266-49-2 185116-92-1 193764-85-1 27306-78-1 Poly(oxy-1,2-ethanediyl), alpha-methyl-omega-(3-(1,3,3,3-tetramethyl-1-((trimethylsilyl)oxy)disiloxanyl)propyl)- Polyethylene glycol mono(3-(tetramethyl-1-(trimethylsiloxy)disiloxanyl)propyl)ether Silwet L 77 Poly(oxy-1,2-ethanediyl), alpha-methyl-omega-(3-(1,3,3,3-tetramethyl-1-((trimethy…	150266-49-2 185116-92-1 193764-85-1 27306-78-1
COC(=O)C(Cc1ccccc1)NC(=O)C(CC(O)=O)NCCC(C)(C)C	3-(3,3-dimethylbutylamino)-4-[(1-methoxy-1-oxo-3-phenylpropan-2-yl)amino]-4-oxobutanoic acid	3-(3,3-dimethylbutylamino)-4-[(1-methoxy-1-oxo-3-phenylpropan-2-yl)amino]-4-oxobutanoic acid 3-(3,3-dimethylbutylamino)-4-[[2-methoxy-2-oxo-1-(phenylmethyl)ethyl]amino]-4-oxo-butanoic acid 3-(3,3-dimethylbutylamino)-4-[[2-methoxy-2-oxo-1-(phenylmethyl)ethyl]amino]-4-oxobutanoic acid 4-[[1-(benzyl)-2-keto-2-methoxy-ethyl]amino]-3-(3,3-dimethylbutylamino)-4-keto-butyric acid 3-(3,3-dimethylbutylami…
CNc1cc(ccc1N(=O)=O)OCC(O)CO	3-(3-methylamino-4-nitrophenoxy)propane-1,2-diol	3-(3-methylamino-4-nitrophenoxy)propane-1,2-diol 3-(3-methylamino-4-nitro-phenoxy)propane-1,2-diol
CC(C)(C)c1cccc(CC(C)C=O)c1	3-(3-tert-butylphenyl)-2-methylpropanal	3-(3-tert-butylphenyl)-2-methylpropanal 3-(3-tert-butylphenyl)-2-methyl-propanal 3-(3-tert-butylphenyl)-2-methyl-propionaldehyde 62518-65-4 Benzenepropanal, 3-(1,1-dimethylethyl)-alpha-methyl- EINECS 263-580-6 Benzenepropanal, 3-(1,1-dimethylethyl)-.alpha.-methyl- Benzenepropanl, 3-[1,1-dimethylethyl]-.alpha.-methyl- 3-(m-tert-Butylphenyl)-2-methylpropionaldehyde	62518-65-4
O=C(Nc1cc(Cl)c(Cl)cc1)Nc1ccc(Cl)cc1		3-(4-chlorophenyl)-1-(3,4-dichlorophenyl)urea 101-20-2 NSC-72005 AIDS053795 Solubacter TCC (soap bacteriostat) TCC Soap D06223 Trichlocarban 1-(4-Chlorophenyl)-3-(3,4-dichlorophenyl)urea 105937_ALDRICH 3,4,4&#8242;-Trichlorocarbanilide Triclocarban [USAN:INN] NCIOpen2_008923 Triclocarbanum [INN-Latin] Triclocarban (USAN) ZINC00121480 NCGC00164034-01 1-(3',4'-Dichlorophenyl)-3-(4'-chlorophenyl)ure…	101-20-2
O=C(Nc1ccc(Cl)cc1)Nc1cc(c(Cl)cc1)C(F)(F)F	3-(4-chlorophenyl)-1-[4-chloro-3-(trifluoromethyl)phenyl]urea	3-(4-chlorophenyl)-1-[4-chloro-3-(trifluoromethyl)phenyl]urea 369-77-7 Halocarban Halocarbano [INN-Spanish] Halocarbanum [INN-Latin] N-(4-Chlorophenyl)-N'-(4-chloro-3-(tifluoromethyl)phenyl)urea N-(4-Chlorophenyl)-N'-(4-chloro-3-(trifluoromethyl)phenyl)urea NSC 114133 TFC Trifluoromethyldichlorocarbanilide Urea, N-(4-chlorophenyl)-N'-(4-chloro-3-(trifluoromethyl)phenyl)- ZINC00001188 AIDS-057326 …	369-77-7
CCc1ccc(CC(C)(C)C=O)cc1	3-(4-ethylphenyl)-2,2-dimethylpropanal	3-(4-ethylphenyl)-2,2-dimethylpropanal 3-(4-ethylphenyl)-2,2-dimethyl-propanal 3-(4-ethylphenyl)-2,2-dimethyl-propionaldehyde 67634-15-5 p-ethyl-.alpha.,.alpha.-dimethyl hydrocinnamic aldehyde 2,2-Dimethyl-3-(p-ethylphenyl)propanal 3-(p-Ethylphenyl)-2,2-dimethylpropionaldehyde Benzenepropanal, 2(or 4)-ethyl-alpha,alpha-dimethyl- Benzenepropanal, 4-ethyl-alpha,alpha-dimethyl- Benzenepropanal, alph…	67634-15-5
CC(C)c1ccc(CCC=O)cc1	3-(4-propan-2-ylphenyl)propanal	3-(4-propan-2-ylphenyl)propanal 3-(4-isopropylphenyl)propanal 3-(4-isopropylphenyl)propionaldehyde 7775-00-0 3-(p-Isopropylphenyl)propionaldehyde 3-(p-Isopropylphenyl)propionaldeyde 3-p-Cumenylpropionaldehyde 4-(1-Methylethyl)benzenepropanal Benzenepropanal, 4-(1-methylethyl)- Cuminacetaldehyde Cuminyl acetaldehyde Cymylpropanal, p- EINECS 231-885-3 FEMA No. 2957 Hydrocinnamaldehyde, p-isopropyl-…	7775-00-0
CC(CC=O)c1ccc(cc1)C(C)(C)C		3-(4-tert-butylphenyl)butanal 3-(4-tert-butylphenyl)butyraldehyde 39390-70-0 75166-25-5 2-(4-tert-Butylbenzyl)propionaldehyde 4-07-00-00802 (Beilstein Handbook Reference) AI3-36196 BRN 0880140 Benzenepropanal, 4-(1,1-dimethylethyl)-alpha-methyl- EINECS 201-289-8 HYDROCINNAMALDEHYDE, p-tert-BUTYL-alpha-METHYL- NSC 22275 Propionaldehyde, beta-(4-tert-butylphenyl)-alpha-methyl- alpha-Methyl, beta-(p…	39390-70-0 75166-25-5
[H]/N=C(/N)\NCCC(O)=O	3-(diaminomethylideneamino)propanoic acid	3-(diaminomethylideneamino)propanoic acid 3-guanidinopropanoic acid 3-Guanidinopropionic acid 353-09-3 3-carbamimidamidopropanoic acid EINECS 206-530-0 Guanidinopropionic acid N-(Aminoiminomethyl)-beta-alanine C03065 PDSP2_000137 CHEBI:15968 dl-.beta.-Guanidino propionic acid 3-Guanidinopropanoate .beta.-Guanidinopropionic acid PDSP1_000138 N-[amino(imino)methyl]-beta-alanine G6878_SIGMA beta-Gua…	353-09-3
CCCCCCCCCCCCCCCC(=O)NCCC[N+](C)(C)[O-]	3-(hexadecanoylamino)-N,N-dimethylpropan-1-amine oxide	3-(hexadecanoylamino)-N,N-dimethylpropan-1-amine oxide 3-(hexadecanoylamino)-N,N-dimethyl-propan-1-amine oxide N,N-dimethyl-3-(1-oxohexadecylamino)propan-1-amine oxide N,N-dimethyl-3-palmitamido-propan-1-amine oxide 67806-12-6 Amides, palmitic, N-(3-(dimethylamino)propyl), N-oxide Hexadecanamide, N-(3-(dimethylamino)propyl)-N-oxide Hexadecanamide, N-(3-(dimethyloxidoamino)propyl)- N-(3-(Dimethyla…	67806-12-6
CCCCCCCCCCCCCCCC(=O)NCCC[N+](C)(C)C	3-(hexadecanoylamino)propyl-trimethylazanium	3-(hexadecanoylamino)propyl-trimethylazanium 3-(hexadecanoylamino)propyl-trimethyl-ammonium trimethyl-[3-(1-oxohexadecylamino)propyl]ammonium trimethyl-(3-palmitamidopropyl)ammonium 3-(hexadecanoylamino)propyl-trimethyl-azanium
CC(C)(C)CC(C)(C)CC(O)=O	3,3,5,5-tetramethylhexanoic acid	3,3,5,5-tetramethylhexanoic acid
CC(O)C(C)C(C)C(C)C(C)(C)C	3,4,5,6,6-pentamethylheptan-2-ol	3,4,5,6,6-pentamethylheptan-2-ol
Oc1cc2NCCOc2cc1	3,4-Dihydro-2H-1,4-benzoxazin-6-ol	3,4-Dihydro-2H-1,4-benzoxazin-6-ol 26021-57-8 ZINC04959769 2H-1,4-Benzoxazin-6-ol, 3,4-dihydro- Oprea1_760613 EINECS 247-415-5 BAS 02083762 3,4-Dihydro-2H-benzo[1,4]oxazin-6-ol Hydroxybenzomorpholine Oprea1_132826	26021-57-8
COc1ccc(C=O)cc1OC	3,4-Dimethoxybenzaldehyde	3,4-Dimethoxybenzaldehyde 120-14-9 ST5213394 3,4-Dimethoxybenzenecarbonal 4-O-Methylvanillin Benzaldehyde, 3,4-dimethoxy- Methylvanillin NSC8500 Protocatechualdehyde dimethyl ether Protocatechuic aldehyde dimethyl ether Vanillin methyl ether Veratral Veratryl aldehyde WLN: VHR CO1 DO1 p-Veratric aldehyde NSC24521 94860_FLUKA NCGC00091642-02 W310905_ALDRICH 4-08-00-01765 (Beilstein Handbook Refere…	120-14-9
CC(CCO)CC(C)(C)C		3,5,5-Trimethylhexan-1-ol 201404-81-1 140237-16-7 3452-97-9 NSC97226 Nonylol InChI=1/C9H20O/c1-8(5-6-10)7-9(2,3)4/h8,10H,5-7H2,1-4H EINECS 222-376-7 1-Hexanol, 3,5,5-trimethyl- 3,5,5-Trimethyl-1-hexanol 3,5,5-Trimethylhexanol NSC83151 EPA Pesticide Chemical Code 492200 FEMA No. 3324 NSC 83151 NSC 97226 Trimethylhexyl alcohol 3,5,5-Trimethylhexyl alcohol 289485_ALDRICH W332402_ALDRICH NCIOpen2_001…	201404-81-1 140237-16-7 3452-97-9
CC(CC=O)CC(C)(C)C		3,5,5-Trimethylhexanal 5435-64-3 W352403_ALDRICH 303550_ALDRICH NSC 21482 3,5,5-Trimethylcapronaldehyde 4-01-00-03362 (Beilstein Handbook Reference) AI3-22274 BRN 1740882 EINECS 226-603-0 FEMA No. 3524 Hexanal, 3,5,5-trimethl- Hexanal, 3,5,5-trimethyl- NSC21482 Isononylaldehyde tert-Butylisopentanal	5435-64-3
CC(CC(C)(C)C)CCOC(=O)CC(C)CC(C)(C)C	3,5,5-Trimethylhexyl 3,5,5-trimethylhexanoate	3,5,5-Trimethylhexyl 3,5,5-trimethylhexanoate 3,5,5-trimethylhexanoic acid 3,5,5-trimethylhexyl ester 59219-71-5 3,5,5-Trimethyl-1-hexyl 3,5,5-trimethylhexanoate EINECS 261-665-2 Hexanoic acid, 3,5,5-trimethyl-, 3,5,5-trimethylhexyl ester Isononyl isononanoate 3,5,5-Trimethylhexyl 3,5,5-trimethylcaproat 82356_FLUKA	59219-71-5
CC(CC(C)(C)C)CCOC(C)=O	3,5,5-Trimethylhexyl acetate	3,5,5-Trimethylhexyl acetate acetic acid 3,5,5-trimethylhexyl ester 3,5,5-trimethylhexyl ethanoate 58430-94-7 1-Hexanol, 3,5,5-trimethyl-, acetate 3,5,5-Trimethylhexan-1-ol acetate 4-02-00-00168 (Beilstein Handbook Reference) ACETIC ACID, 3,5,5-TRIMETHYLHEXYL ESTER BRN 1758391 EINECS 261-245-9 Isononyl acetate Nonanyl acetate	58430-94-7
CC(CC(C)(C)C)CCOC=O	3,5,5-Trimethylhexyl formate	3,5,5-Trimethylhexyl formate formic acid 3,5,5-trimethylhexyl ester 3,5,5-trimethylhexyl methanoate 67355-38-8 1-Hexanol, 3,5,5-trimethyl-, formate EINECS 266-661-4	67355-38-8
CC(=O)C(C)C(=C)C(C)C(C)(C)C	3,5,6,6-tetramethyl-4-methylideneheptan-2-one	3,5,6,6-tetramethyl-4-methylideneheptan-2-one 3,5,6,6-tetramethyl-4-methylene-heptan-2-one 3,5,6,6-Tetramethyl-4-methyleneheptan-2-one 3-methyl-4-(1,2,2-trimethylpropyl)pent-4-en-2-one 3,5,6,6-tetramethyl-4-methylidene-heptan-2-one 81786-75-6 2-Heptanone, 3,5,6,6-tetramethyl-4-methylene- EINECS 279-825-5	81786-75-6
CCCC(C)CC(C)CC(C)CC	3,5,7-trimethyldecane	3,5,7-trimethyldecane 90622-58-5 Alkanes, C11-15, iso-
Oc1c(I)c2Oc3c(cc(I)c(O)c3I)C3(OC(=O)c4ccccc34)c2cc1I	3',6'-dihydroxy-2',4',5',7'-tetraiodospiro[2-benzofuran-3,9'-xanthene]-1-one	3',6'-dihydroxy-2',4',5',7'-tetraiodospiro[2-benzofuran-3,9'-xanthene]-1-one 3',6'-dihydroxy-2',4',5',7'-tetraiodo-spiro[isobenzofuran-3,9'-xanthene]-1-one 3',6'-dihydroxy-2',4',5',7'-tetraiodo-1-spiro[isobenzofuran-3,9'-xanthene]one 3',6'-dihydroxy-2',4',5',7'-tetraiodo-spiro[2-benzofuran-3,9'-xanthene]-1-one 10557-31-0 30495-83-1 SMP2_000049 200964_ALDRICH C.I. 45430:2 Solvent Red- 140 2',4',5'…
Oc1ccc2c(Oc3c(ccc(O)c3N(=O)=O)C32OC(=O)c2ccccc32)c1N(=O)=O		3',6'-dihydroxy-4',5'-dinitrospiro[2-benzofuran-3,9'-xanthene]-1-one 3',6'-dihydroxy-4',5'-dinitro-spiro[isobenzofuran-3,9'-xanthene]-1-one 3',6'-dihydroxy-4',5'-dinitro-1-spiro[isobenzofuran-3,9'-xanthene]one 3',6'-dihydroxy-4',5'-dinitro-spiro[2-benzofuran-3,9'-xanthene]-1-one 24545-86-6 3',6'-Dihydroxy-4',5'-dinitrospiro(isobenzofuran-1(3H),9'-(9H)xanthene)-3-one 3',6'-Dihydroxy-4',5'-dinitros…	24545-86-6
CC(CCC(C)(O)CC)CC	3,6-Dimethyloctan-3-ol	3,6-Dimethyloctan-3-ol 151-19-9 AI3-23412 Aprol 100 EINECS 205-787-6 NSC 5613 3,6-Dimethyl-3-octanol 3-Octanol, 3,6-dimethyl- AR 1 NSC5613	151-19-9
CC(C)CCCC(C)CCCC(C)CCCC(C)(O)C=C	3,7,11,15-Tetramethylhexadec-1-en-3-ol	3,7,11,15-Tetramethylhexadec-1-en-3-ol 505-32-8 NCGC00090800-01 1-Hexadecene-3-ol, 3,7,11,15-tetramethyl 59229_FLUKA 1-Hexadecyl-3-ol, 3,7,11,15-tetramethyl NSC93744 W519200_ALDRICH ZERO/001270 1-Hexadecen-3-ol, 3,7,11,15-tetramethyl- 1-Hexadecen-3-ol, 3,7,11,15-tetramethyl- (VAN) (8CI)(9CI) 2,6,10,14-Tetramethylhexadec-15-en-14-ol 2,6,10-Trimethyl-14-vinylpentadecan-14-ol 3,7,11,15-Tetramethyl-1…	505-32-8
CC(C)=CCCC(C)=CCCC(C)=CCCC(C)(O)C=C	3,7,11,15-Tetramethylhexadeca-1,6,10,14-tetraen-3-ol (6E,10E)-3,7,11,15-tetramethylhexadeca-1,6,10,14-tetraen-3-ol	3,7,11,15-Tetramethylhexadeca-1,6,10,14-tetraen-3-ol (6E,10E)-3,7,11,15-tetramethylhexadeca-1,6,10,14-tetraen-3-ol 1113-21-9 2211-30-5 3790-75-8 EINECS 214-201-8 Geranyl linalool Geranyllinalool (6E,10E)-3,7,11,15-Tetramethyl-1,6,10,14-hexadecatetraen-3-ol 1,6,10,14-Hexadecatetraen-3-ol, 3,7,11,15-tetramethyl-, (E,E)- (E,E)-3,7,11,15-Tetramethylhexadeca-1,6,10,14-tetraen-3-ol 1,6,10,14-Hexadecate…	1113-21-9 2211-30-5 3790-75-8
CC(C)CCCC(C)CCCC(C)CCCC(C)(O)C(O)CO	3,7,11,15-Tetramethylhexadecane-1,2,3-triol	3,7,11,15-Tetramethylhexadecane-1,2,3-triol 74563-64-7 3,7,11,15,-Tetramethyl-1,2,3-hexadecanetriol EINECS 277-923-2 Phytantriol 1,2,3-Hexadecanetriol, 3,7,11,15-tetramethyl-
CC(C)=CCCC(C)=CCCC(C)(C=C)OC(C)=O		3,7,11-Trimethyldodeca-1,6,10-trien-3-yl acetate [(6E)-3,7,11-trimethyldodeca-1,6,10-trien-3-yl] acetate (1,5,9-trimethyl-1-vinyl-deca-4,8-dienyl) acetate [(4E)-1,5,9-trimethyl-1-vinyl-deca-4,8-dienyl] acetate acetic acid [(4E)-1,5,9-trimethyl-1-vinyldeca-4,8-dienyl] ester acetic acid (1,5,9-trimethyl-1-vinyldeca-4,8-dienyl) ester acetic acid [(4E)-1,5,9-trimethyl-1-vinyl-deca-4,8-dienyl] ester a…
CCC(C)(O)CCC=C(C)C		3,7-Dimethyloct-6-en-3-ol 18479-51-1 2270-57-7 94006-45-8 1,2-Dihydrolinalool 3,7-Dimethyl-6-octen-3-ol 6-Octen-3-ol, 3,7-dimethyl- AI3-24906 Dihydrolinalool EINECS 242-359-8	18479-51-1 2270-57-7 94006-45-8
CC(CC#N)CCC=C(C)C	3,7-Dimethyloct-6-enenitrile	3,7-Dimethyloct-6-enenitrile 51566-62-2 3,7-Dimethyl-6-octene-1-nitrile 6-OCTENENITRILE, 3,7-DIMETHYL- Citronellonitrile Citronellyl nitrile EINECS 257-288-8	51566-62-2
CC(C)=CCCC(C)CC(O)=O	3,7-dimethyloct-6-enoic acid	3,7-dimethyloct-6-enoic acid 57030-77-0 502-47-6 W314218_ALDRICH C16462 3,7-Dimethyl-6-octenoic acid 4-02-00-01610 (Beilstein Handbook Reference) 6-OCTENOIC ACID, 3,7-DIMETHYL- BRN 1722960 Citronellic acid EINECS 207-939-7 FEMA No. 3142 Rhodinolic acid LMFA01020104 SBB006596 303429_ALDRICH	57030-77-0 502-47-6
CC(C)=CCCC(C)CCOC(=O)C(C)C	3,7-dimethyloct-6-enyl 2-methylpropanoate	3,7-dimethyloct-6-enyl 2-methylpropanoate 2-methylpropanoic acid 3,7-dimethyloct-6-enyl ester 2-methylpropionic acid 3,7-dimethyloct-6-enyl ester 97-89-2 76444-25-2 3,7-Dimethyloct-6-enyl isobutyrate AI3-33225 Citronellyl 2-methylpropanoate EINECS 202-616-7 FEMA No. 2313 FEMA No. 2983 Isobutyric acid, 3,7-dimethyl-6-octenyl ester (8CI) NSC 46148 Propanoic acid, 2-methyl-, 3,7-dimethyl-6-octenyl R…	97-89-2 76444-25-2
CC(C)=CCCC(C)CCOC(=O)CC(C)C	3,7-dimethyloct-6-enyl 3-methylbutanoate	3,7-dimethyloct-6-enyl 3-methylbutanoate 3-methylbutanoic acid 3,7-dimethyloct-6-enyl ester 3-methylbutyric acid 3,7-dimethyloct-6-enyl ester 94345-75-2 93919-92-7 94086-64-3 68922-10-1 (S)-3,7-Dimethyloct-6-enyl isovalerate Citronellyl iso-valerate Citronellyl isovalerate EINECS 301-852-9 (1)-3,7-Dimethyloct-6-enyl isovalerate (R)-3,7-Dimethyloct-6-enyl isovalerate EINECS 305-129-9 3,7-Dimethylo…	94345-75-2 93919-92-7 94086-64-3 68922-10-1
CC(C)=CCCC(C)CCOC(C)=O	3,7-dimethyloct-6-enyl acetate	3,7-dimethyloct-6-enyl acetate acetic acid 3,7-dimethyloct-6-enyl ester 3,7-dimethyloct-6-enyl ethanoate 20425-54-1 67601-05-2 67650-82-2 150-84-5 Acetic acid, citronellyl ester EINECS 205-775-0 (1)-3,7-Dimethyloct-6-enyl acetate 1-02-00-00065 (Beilstein Handbook Reference) 3,7-Dimethyl-6-octen-1-ol acetate 3,7-Dimethyl-6-octen-1-yl ethanoate 6-Octen-l-ol, 3,7-dimethyl-, acetate 2-Octen-8-ol, 2,6…	20425-54-1 67601-05-2 67650-82-2 150-84-5
CC(C)=CCCC(C)CCOC(=O)CCC		3,7-dimethyloct-6-enyl butanoate butanoic acid 3,7-dimethyloct-6-enyl ester butyric acid 3,7-dimethyloct-6-enyl ester 76444-24-1 94133-43-4 93919-89-2 141-16-2 134982-45-9 (1)-3,7-Dimethyloct-6-enyl butyrate 2-02-00-00248 (Beilstein Handbook Reference) 3,7-Dimethyl-6-octen-1-yl butyrate 3,7-Dimethyl-6-octenyl butanoate AI3-24200 BRN 1707201 Butyric acid, 3,7-dimethyl-6-octenyl ester (8CI) 6-Octen…
CC(C)=CCCC(C)CCOC(=O)CC	3,7-dimethyloct-6-enyl propanoate	3,7-dimethyloct-6-enyl propanoate propanoic acid 3,7-dimethyloct-6-enyl ester propionic acid 3,7-dimethyloct-6-enyl ester 94086-40-5 141-14-0 76444-23-0 89460-13-9 (1)-3,7-Dimethyloct-6-enyl propionate 3,7-DIMETHYL-6-OCTEN-1-OL PROPIONATE 3,7-Dimethyl-6-octen-1-ol propanoate 3,7-Dimethyl-6-octen-1-yl propanoate 3,7-Dimethyl-6-octen-1-yl propionate 6-Octen-1-ol, 3,7-dimethyl-, propanoate 6-Octen-1…
CC(CCO)CCCC(C)=C	3,7-Dimethyloct-7-en-1-ol	3,7-Dimethyloct-7-en-1-ol .alpha.-Citronellol
CC(CCO)CCC(O)C(C)=C	3,7-Dimethyloct-7-ene-1,6-diol	3,7-Dimethyloct-7-ene-1,6-diol 22460-95-3 22626-42-2 7-Octene-1,6-diol, 3,7-dimethyl- EINECS 245-015-5	22460-95-3 22626-42-2
CC(=C)CCCC(C)CCOC(=O)CC(C)C	3,7-dimethyloct-7-enyl 3-methylbutanoate	3,7-dimethyloct-7-enyl 3-methylbutanoate 3-methylbutanoic acid 3,7-dimethyloct-7-enyl ester 3-methylbutyric acid 3,7-dimethyloct-7-enyl ester 7778-96-3 (S)-3,7-Dimethyloct-7-enyl isovalerate 3,7,-Dimethyl-7-octenyl 3-methylbutanoate, (S)- 3,7-Dimethyl-7-octen-1-yl 3-methylbutanoate 3,7-Dimethyl-7-octen-1-yl isovalerate, (-)- Butanoic acid, 3-methyl-, (3S)-3,7-dimethyl-7-octenyl ester Butanoic aci…	7778-96-3
CC(=C)CCCC(C)CCOC(=O)CCC	3,7-dimethyloct-7-enyl butanoate	3,7-dimethyloct-7-enyl butanoate butanoic acid 3,7-dimethyloct-7-enyl ester butyric acid 3,7-dimethyloct-7-enyl ester 141-15-1 3,7-Dimethyl-7-octen-1-yl butyrate BUTANOIC ACID, 3,7-DIMETHYL-7-OCTENYL ESTER Butyric acid, 3,7-dimethyl-7-octenyl ester EINECS 205-462-9 3,7-Dimethyl-7-octen-1-yl butanoate	141-15-1
CC(CCCC(C)=C)CCOC=O	3,7-dimethyloct-7-enyl formate	3,7-dimethyloct-7-enyl formate formic acid 3,7-dimethyloct-7-enyl ester 3,7-dimethyloct-7-enyl methanoate 141-09-3 Rhodinyl methanoate 3,7-Dimethyl-7-octen-1-yl formate 3,7-Dimethyl-7-octen-1-yl methanoate 7-OCTEN-1-OL, 3,7-DIMETHYL-, FORMATE EINECS 205-456-6	141-09-3
CC(=C)CCCC(C)CCOC(=O)CC	3,7-dimethyloct-7-enyl propanoate	3,7-dimethyloct-7-enyl propanoate propanoic acid 3,7-dimethyloct-7-enyl ester propionic acid 3,7-dimethyloct-7-enyl ester 105-89-5 3,7-Dimethyl-7-octen-1-yl propanoate 3,7-Dimethyl-7-octen-1-yl propionate 7-OCTEN-1-OL, 3,7-DIMETHYL-, PROPIONATE 7-Octen-1-ol, 3,7-dimethyl-, propanoate EINECS 203-343-6 FEMA No. 2986 Rhodinyl propanoate Rhodinyl propionate
CC(C)=CCCC(C)(C=C)OC(=O)c1ccccc1N	3,7-dimethylocta-1,6-dien-3-yl 2-aminobenzoate	3,7-dimethylocta-1,6-dien-3-yl 2-aminobenzoate (1,5-dimethyl-1-vinyl-hex-4-enyl) 2-aminobenzoate 2-aminobenzoic acid (1,5-dimethyl-1-vinylhex-4-enyl) ester 2-aminobenzoic acid (1,5-dimethyl-1-vinyl-hex-4-enyl) ester 7149-26-0 1,6-Octadien-3-ol, 3,7-dimethyl-, 2-aminobenzoate 3,7-Dimethyl-1,6-octadien-3-yl, anthranilate Anthranilic acid, 1,5-dimethyl-1-vinyl-4-hexenyl ester Anthranilic acid, linal…
CC(C)=CCCC(C)(C=C)OC=O	3,7-dimethylocta-1,6-dien-3-yl formate	3,7-dimethylocta-1,6-dien-3-yl formate (1,5-dimethyl-1-vinyl-hex-4-enyl) formate formic acid (1,5-dimethyl-1-vinylhex-4-enyl) ester formic acid (1,5-dimethyl-1-vinyl-hex-4-enyl) ester 3,7-dimethylocta-1,6-dien-3-yl methanoate 115-99-1 NSC 46116 1,6-Octadien-3-ol, 3,7-dimethyl-, formate LINOLOOL, FORMATE Linalool, formate Linalyl formate NSC46116 W264202_ALDRICH 3,7-Dimethyl-1,6-octadien-3-ol form…	115-99-1
CC(C)=CCCC(C)=CCOC(=O)CC(C)C	3,7-dimethylocta-2,6-dienyl 3-methylbutanoate [(2E)-3,7-dimethylocta-2,6-dienyl] 3-methylbutanoate	3,7-dimethylocta-2,6-dienyl 3-methylbutanoate [(2E)-3,7-dimethylocta-2,6-dienyl] 3-methylbutanoate 3-methylbutanoic acid [(2E)-3,7-dimethylocta-2,6-dienyl] ester 3-methylbutanoic acid 3,7-dimethylocta-2,6-dienyl ester 3-methylbutyric acid [(2E)-3,7-dimethylocta-2,6-dienyl] ester 3-methylbutyric acid 3,7-dimethylocta-2,6-dienyl ester 3915-83-1 (Z)-Geranyl isovalerate 2,6-OCTADIEN-1-OL, 3,7-DIMETHY…
CC(C)CCCC(C)CC#N	3,7-Dimethyloctanenitrile	3,7-Dimethyloctanenitrile 3,7-dimethylcaprylonitrile 40188-41-8 Octanenitrile, 3,7-dimethyl-	40188-41-8
CC(C)CCCC(C)CCOC(C)=O		3,7-Dimethyloctyl acetate acetic acid 3,7-dimethyloctyl ester 3,7-dimethyloctyl ethanoate 20780-49-8 3,7-Dimethyloctanyl acetate 3,7-Dimethyloctanyl-1-acetate AI3-28806 Dihydrocitronellyl acetate EINECS 244-034-6 Tetrahydrogeranyl acetate 1-OCTANOL, 3,7-DIMETHYL-, ACETATE 3,7-Dimethyl-1-octanol, acetate 3,7-Dimethyl-1-octanyl acetate 3,7-Dimethyl-1-octyl acetate	20780-49-8
CC(C)CCCC(C)CCOC(=O)CCC	3,7-dimethyloctyl butanoate	3,7-dimethyloctyl butanoate butanoic acid 3,7-dimethyloctyl ester butyric acid 3,7-dimethyloctyl ester 67874-80-0 3,7-Dimethyloctanyl butyrate 3,7-Dimethyloctyl butyrate BRN 1772718 BUTANOIC ACID, 3,7-DIMETHYLOCTYL ESTER EINECS 267-508-4 Tetrahydrogeranyl butyrate	67874-80-0
CC(C)(CO)C(O)C(=O)NCCC(O)=O	3-[(2,4-dihydroxy-3,3-dimethylbutanoyl)amino]propanoic acid	3-[(2,4-dihydroxy-3,3-dimethylbutanoyl)amino]propanoic acid 3-[(2,4-dihydroxy-3,3-dimethyl-butanoyl)amino]propanoic acid 3-[(2,4-dihydroxy-3,3-dimethyl-1-oxobutyl)amino]propanoic acid 3-[(2,4-dihydroxy-3,3-dimethyl-butanoyl)amino]propionic acid 599-54-2 79-83-4 3-(2,4-dihydroxy-3,3-dimethylbutanamido)propanoic acid CHEBI:7916 N-(2,4-dihydroxy-3,3-dimethylbutanoyl)-beta-alanine (1)-N-(2,4-Dihydrox…
CC(C)(O)CC(O)C(=O)NCCC(O)=O		3-[(2,4-dihydroxy-4-methylpentanoyl)amino]propanoic acid 3-[(2,4-dihydroxy-4-methyl-pentanoyl)amino]propanoic acid 3-[(2,4-dihydroxy-4-methyl-1-oxopentyl)amino]propanoic acid 3-[(2,4-dihydroxy-4-methyl-pentanoyl)amino]propionic acid
CCC=CCCOCCC#N	3-[(E)-hex-3-enoxy]propanenitrile	3-[(E)-hex-3-enoxy]propanenitrile 3-[(E)-hex-3-enoxy]propionitrile
OCCCNc1ccc(cc1N(=O)=O)N(CCO)CCO	3-[[4-(bis(2-hydroxyethyl)amino)-2-nitrophenyl]amino]propan-1-ol	3-[[4-(bis(2-hydroxyethyl)amino)-2-nitrophenyl]amino]propan-1-ol 3-[[4-(bis(2-hydroxyethyl)amino)-2-nitro-phenyl]amino]propan-1-ol
CCOCCCC(C)OCCOCC(C)CO	3-[2-(5-ethoxypentan-2-yloxy)ethoxy]-2-methylpropan-1-ol	3-[2-(5-ethoxypentan-2-yloxy)ethoxy]-2-methylpropan-1-ol 3-[2-(4-ethoxy-1-methyl-butoxy)ethoxy]-2-methyl-propan-1-ol 3-[2-(4-ethoxy-1-methylbutoxy)ethoxy]-2-methylpropan-1-ol 3-[2-(5-ethoxypentan-2-yloxy)ethoxy]-2-methyl-propan-1-ol 96733-38-9 116357-06-3 55934-93-5 ((Butoxymethylethoxy)methylethoxy)propan-1-ol EINECS 259-910-3 Propanol, (2-(2-butoxymethylethoxy)methylethoxy)- Tripropylene glycol…
CCCCCCCC(=O)NC(CSSCC(NC(=O)CCCCCCC)C(O)=O)C(O)=O		3-[3-hydroxy-2-(octanoylamino)-3-oxopropyl]disulfanyl-2-(octanoylamino)propanoic acid 3-[3-hydroxy-2-(octanoylamino)-3-oxo-propyl]disulfanyl-2-(octanoylamino)propanoic acid 3-[3-hydroxy-3-oxo-2-(1-oxooctylamino)propyl]disulfanyl-2-(1-oxooctylamino)propanoic acid 2-(caprylylamino)-3-[2-(caprylylamino)-3-hydroxy-3-keto-propyl]disulfanyl-propionic acid
CC(=O)OC(CC([O-])=O)C[N+](C)(C)C	3-acetyloxy-4-trimethylazaniumylbutanoate	3-acetyloxy-4-trimethylazaniumylbutanoate 3-acetoxy-4-trimethylammonio-butanoate 3-acetoxy-4-trimethylammoniobutanoate 3-acetoxy-4-trimethylammonio-butyrate 3-acetyloxy-4-trimethylazaniumyl-butanoate 870-77-9 14992-62-2 1-Propanaminium, 2-(acetyloxy)-3-carboxy-N,N,N-trimethyl-, inner salt ACETYLCARNITINE Acetyl carnitine 1-Propanaminium, 2-(acetoxy)-3-carboxy-N,N,N-trimethyl-, hydroxide, inner sa…	870-77-9 14992-62-2
Nc1c(Cl)c(O)ccc1Cl	3-Amino-2,4-dichlorophenol	3-Amino-2,4-dichlorophenol 3-amino-2,4-dichloro-phenol 61693-42-3 EINECS 262-909-0 Phenol, 3-amino-2,4-dichloro-
COC(=O)C(Cc1ccccc1)NC(=O)C(N)CC(O)=O		3-amino-4-[(1-methoxy-1-oxo-3-phenylpropan-2-yl)amino]-4-oxobutanoic acid 3-amino-4-[[2-methoxy-2-oxo-1-(phenylmethyl)ethyl]amino]-4-oxo-butanoic acid 3-amino-4-[[2-methoxy-2-oxo-1-(phenylmethyl)ethyl]amino]-4-oxobutanoic acid 3-amino-4-[[1-(benzyl)-2-keto-2-methoxy-ethyl]amino]-4-keto-butyric acid 3-amino-4-[(1-methoxy-1-oxo-3-phenyl-propan-2-yl)amino]-4-oxo-butanoic acid 53906-69-7 22839-47-0 7…	53906-69-7 22839-47-0 7421-84-3
CCOC(=O)C(N)CC(O)=O	3-amino-4-ethoxy-4-oxobutanoic acid	3-amino-4-ethoxy-4-oxobutanoic acid 3-amino-4-ethoxy-4-oxo-butanoic acid 3-amino-4-ethoxy-4-keto-butyric acid 21860-85-5 NSC120026 .alpha.-Ethyl aspartate
NCCC(O)=O		3-aminoprop-2-ynoic acid 3-Aminopropanoic acid 3-Aminopropionic acid 3-aminopropiolic acid 28854-76-4 39748-53-3 107-95-9 87867-95-6 NSC7603 Propanoic acid, 3-amino- AI3-18470 Alanine, beta- EINECS 203-536-5 FEMA No. 3252 NSC 7603 3-Aminopropionsaeure B-ALANINE beta-alanine W325201_ALDRICH 05159_FLUKA NCGC00024495-01 Beta Alanine Tocris-0206 AIDS-018621 C00099 A9920_SIGMA AIDS018621 H2NCH2CH2COOH…	28854-76-4 39748-53-3 107-95-9 87867-95-6
NCCCOP(O)(O)=O		3-Aminopropyl dihydrogen phosphate 1071-28-9 1-Propanol, 3-amino-, dihydrogen phosphate (ester) 3-Amino-1-propanol dihydrogen phosphate (ester) 3-Aminopropyl monophosphate 4-04-00-01628 (Beilstein Handbook Reference) BRN 1763687	1071-28-9
[H]/N=C(/N)\c1cc(Br)c(cc1)OCCCOc1ccc(cc1Br)/C(/N)=N/[H]	3-bromo-4-[3-(2-bromo-4-carbamimidoylphenoxy)propoxy]benzenecarboximidamide	3-bromo-4-[3-(2-bromo-4-carbamimidoylphenoxy)propoxy]benzenecarboximidamide 3-bromo-4-[3-(2-bromo-4-carbamimidoyl-phenoxy)propoxy]benzamidine 3-bromo-4-[3-(2-bromo-4-carbamimidoylphenoxy)propoxy]benzamidine 4-[3-(4-amidino-2-bromo-phenoxy)propoxy]-3-bromo-benzamidine 3-bromo-4-[3-(2-bromo-4-carbamimidoyl-phenoxy)propoxy]benzenecarboximidamide 496-00-4 Dibromopropamidine Dibrompropamidine Dibrompr…	496-00-4
[H]/N=C(/N)\c1cc(Br)c(cc1)OCCCCCCOc1ccc(cc1Br)/C(/N)=N/[H]		3-bromo-4-[6-(2-bromo-4-carbamimidoylphenoxy)hexoxy]benzenecarboximidamide 3-bromo-4-[6-(2-bromo-4-carbamimidoyl-phenoxy)hexoxy]benzamidine 3-bromo-4-[6-(2-bromo-4-carbamimidoylphenoxy)hexoxy]benzamidine 4-[6-(4-amidino-2-bromo-phenoxy)hexoxy]-3-bromo-benzamidine 3-bromo-4-[6-(2-bromo-4-carbamimidoyl-phenoxy)hexoxy]benzenecarboximidamide 93856-82-7	93856-82-7
Cc1ccc(O)cc1NCC	3-ETHYLAMINO-4-METHYLPHENOL	3-ETHYLAMINO-4-METHYLPHENOL 3-ethylamino-4-methyl-phenol 120-37-6 CCRIS 4639 EINECS 204-391-0 Phenol, 3-(ethylamino)-4-methyl- ZINC00409228 3-(ethylamino)-4-methylphenol NCGC00091605-01 1-13-00-00227 (Beilstein Handbook Reference) 3-(Ethylamino)-p-cresol BRN 3241548	120-37-6
CCc1cccc(O)c1	3-Ethylphenol	3-Ethylphenol 620-17-7 1-Ethyl-3-hydroxybenzene 1-Hydroxy-3-ethylbenzene NSC8873 Phenol, 3-ethyl- Phenol, m-ethyl- m-Ethylphenol ZINC01648289 InChI=1/C8H10O/c1-2-7-4-3-5-8(9)6-7/h3-6,9H,2H2,1H 04688_FLUKA 36723_RIEDEL C14386 281417_ALDRICH AI3-19938 Benzene, 1-ethyl-3-hydroxy- EINECS 210-627-3 HSDB 5720 NSC 8873 Phenol, m-ethyl- (8CI) meta-Ethylphenol	620-17-7
CC1(C)COC(=O)C1O	3-hydroxy-4,4-dimethyloxolan-2-one	3-hydroxy-4,4-dimethyloxolan-2-one 3-hydroxy-4,4-dimethyl-tetrahydrofuran-2-one 3-hydroxy-4,4-dimethyl-2-tetrahydrofuranone 3-hydroxy-4,4-dimethyl-oxolan-2-one 79-50-5 52126-90-6 599-04-2 16562-48-4 631-68-5 beta,beta-Dimethyl-alpha-hydroxy-gamma-butyrolactone NSC8113 NSC8114 (3R)-dihydro-3-hydroxy-4,4-dimethyl-2(3H)-furanone (R)-Pantoyl lactone (R)-pantolactone PANTOYL-LACTONE pantoyl lactone 2(…	79-50-5 52126-90-6 599-04-2 16562-48-4 631-68-5
C[N+](C)(C)CC(O)CC([O-])=O	3-hydroxy-4-trimethylazaniumylbutanoate	3-hydroxy-4-trimethylazaniumylbutanoate 3-hydroxy-4-trimethylammonio-butanoate 3-HYDROXY-4-TRIMETHYLAMMONIOBUTANOATE 3-hydroxy-4-trimethylammonio-butyrate 3-hydroxy-4-trimethylazaniumyl-butanoate 406-76-8 541-14-0 541-15-1 461-06-3 (3-Carboxy-2-hydroxypropyl)trimethylammonium hydroxide inner salt Carnitina [INN-Spanish] Carnitine [INN] Carnitinum [INN-Latin] DL-Carnitine (+)-Carnitine 3-hydroxy-4…	406-76-8 541-14-0 541-15-1 461-06-3
[H]/N=C/CC#N	3-iminopropanenitrile	3-iminopropanenitrile 3-iminopropionitrile
CCCCNC(=O)OCC#CI	3-iodoprop-2-ynyl N-butylcarbamate	3-iodoprop-2-ynyl N-butylcarbamate N-butylcarbamic acid 3-iodoprop-2-ynyl ester 104732-42-5 161849-41-8 55406-53-6 84826-91-5 85045-09-6 BRN 2248232 Butyl-3-iodo-2-propynylcarbamate Carbamic acid, butyl-, 3-iodo-2-propynyl ester Carbamic acid, butyl-3-iodo-2-propynyl ester Caswell No. 501A EINECS 259-627-5 EPA Pesticide Chemical Code 107801 HSDB 7314 Iodopropynyl butylcarbamate Troysan KK-108A Tr…	104732-42-5 161849-41-8 55406-53-6 84826-91-5 85045-09-6
COC(C)CCO	3-Methoxybutan-1-ol	3-Methoxybutan-1-ol 2517-43-3 89378-53-0 CCRIS 8976 EINECS 219-741-8 NSC 65580 InChI=1/C5H12O2/c1-5(7-2)3-4-6/h5-6H,3-4H2,1-2H NCIOpen2_000145 M12207_ALDRICH 1-Butanol, 3-methoxy- 3-Methoxy-1-butanol 3-Methoxybutanol NSC65580 AI3-24920	2517-43-3 89378-53-0
Cc1c[nH]c2ccccc21	3-Methyl-1H-indole	3-Methyl-1H-indole 83-34-1 CHEBI:9171 W301906_ALDRICH M51458_ALDRICH 85460_FLUKA STK033388 1H-Indole, 3-methyl- 3-MI 3-Methyl-4,5-benzopyrrole AI3-24372 CCRIS 8961 EINECS 201-471-7 FEMA No. 3019 HSDB 3511 Indole, 3-methyl- NSC 122024 Scatole Skatol beta-Methylindole InChI=1/C9H9N/c1-7-6-10-9-5-3-2-4-8(7)9/h2-6,10H,1H .beta.-Methylindole NSC122024 WLN: T56 BMJ D1 3-Methylindole C08313 Skatole ZINC…	83-34-1
CC(C)C(O)Cc1ccccc1	3-Methyl-1-phenylbutan-2-ol	3-Methyl-1-phenylbutan-2-ol 3-methyl-1-phenyl-butan-2-ol 705-58-8 120442-22-0 Benzeneethanol, .alpha.-(1-methylethyl)- NSC68518 Phenethyl alcohol, .alpha.-isopropyl- 1-Phenyl-3-methyl-2-butanol AI3-05670 Benzeneethanol, alpha-(1-methylethyl)- EINECS 211-886-5 NSC 68518 Phenethyl alcohol, alpha-isopropyl- (8CI) alpha-Isopropylphenethyl alcohol	705-58-8 120442-22-0
CC1CCC(=O)C=1CC=CCC		3-methyl-2-pent-2-enylcyclopent-2-en-1-one 3-methyl-2-[(E)-pent-2-enyl]cyclopent-2-en-1-one 3-methyl-2-pent-2-enyl-cyclopent-2-en-1-one 3-methyl-2-pent-2-enyl-1-cyclopent-2-enone 3-methyl-2-[(E)-pent-2-enyl]-1-cyclopent-2-enone 6261-18-3 3-Methyl-2-(2-pentenyl)-2-cyclopenten-1-one 3-Methyl-(cis-2-penten-1-yl)-2-cyclopenten-1-one AIDS-032327 AIDS032327 3-Methyl-2-pent-2-enyl-cyclopent-2-enone 3-Me…	6261-18-3
CC(CCO)CCc1ccccc1	3-methyl-5-phenylpentan-1-ol	3-methyl-5-phenylpentan-1-ol 3-methyl-5-phenyl-pentan-1-ol 55066-48-3 72746-98-6 3-Methyl-5-phenylpentanol Benzenepentanol, 2-methyl- Benzenepentanol, gamma-methyl- EINECS 259-461-3 Phenylisohexanol gamma-Methylbenzenepentanol BB_NC-0136 3-Methyl-5-phenyl-1-pentanol 3-Methyl-5-phenyl-n-pentanol	55066-48-3 72746-98-6
CC(C)=CCO	3-Methylbut-2-en-1-ol	3-Methylbut-2-en-1-ol 135146-66-6 556-82-1 CHEBI:16019 butenol methyl 66093_FLUKA 162353_ALDRICH 3-Methyl-2-buten-1-ol C01390 Prenol 39121_FLUKA .gamma.,.gamma.-Dimethylallyl alcohol NSC158709 InChI=1/C5H10O/c1-5(2)3-4-6/h3,6H,4H2,1-2H W364703_ALDRICH ZINC00897129 2-Buten-1-ol, 3-methyl- 3,3-Dimethylallyl alcohol 3-Methyl-2-butenol 3-Methyl-2-butenyl alcohol 3-Methylcrotyl alcohol 4-01-00-02129 (…	135146-66-6 556-82-1
CC(C)C(C)=O	3-methylbutan-2-one	3-methylbutan-2-one 52325-52-7 563-80-4 46212_RIEDEL 59600_FLUKA 537721_SIAL 2-BUTANONE,3-METHYL METHYL ISOPROPYL KETONE InChI=1/C5H10O/c1-4(2)5(3)6/h4H,1-3H 2-Acetyl propane 2-Methyl-3-butanone 3-Methylbutan-2-one [UN2397] [Flammable liquid] 3-Methylbutanone AI3-24194 Caswell No. 555A EINECS 209-264-3 EPA Pesticide Chemical Code 044104 2-Acetylpropane Methylbutanone (VAN) 3-Methyl-2-butanone Iso…	52325-52-7 563-80-4
CC(C)CC=O	3-Methylbutanal	3-Methylbutanal 3-Methylbutyraldehyde 590-86-3 26140-47-6 146455_ALDRICH 1-Butanal, 3-methyl- 2-Methylbutanal-4 3-Methyl butyraldehyde 3-Methyl-1-butanal 3-Methylbutylaldehyde 3-Methylbutyraldehyde (natural) 4-01-00-03291 (Beilstein Handbook Reference) AI3-16106 Aldehyde isovalerianique [French] BRN 0773692 Butanal, 3-methyl- Butyraldehyde, 3-methyl- CCRIS 2945 C07329 Isovaleraldehyde HSDB 628 Is…	590-86-3 26140-47-6
CC(C)CCOCc1ccccc1		3-methylbutoxymethylbenzene isopentyloxymethylbenzene isoamoxymethylbenzene 122-73-6 3-06-00-01457 (Beilstein Handbook Reference) AI3-00750 BRN 2251737 Benzene, ((3-methylbutoxy)methyl)- EINECS 204-570-3 NSC 9294 Benzene, [(3-methylbutoxy)methyl]- Benzyl isoamyl ether Benzyl isopentyl ether Ether, benzyl isopentyl Isoamyl benzyl ether NSC9294 WLN: 1Y1&2O1R	122-73-6
CC(=CC)C(=O)OCCC(C)C	3-methylbutyl 2-methylbut-2-enoate 3-methylbutyl (E)-2-methylbut-2-enoate	3-methylbutyl 2-methylbut-2-enoate 3-methylbutyl (E)-2-methylbut-2-enoate isopentyl 2-methylbut-2-enoate isopentyl (E)-2-methylbut-2-enoate 2-methylbut-2-enoic acid isopentyl ester (E)-2-methylbut-2-enoic acid isopentyl ester (E)-2-methylbut-2-enoic acid isoamyl ester 2-methylbut-2-enoic acid isoamyl ester 41519-18-0 2-Butenoic acid, 2-methyl-, 3-methylbutyl ester, (2E)- 2-Butenoic acid, 2-methyl…	41519-18-0
CC(C)CC(=O)OCCC(C)C	3-Methylbutyl 3-methylbutanoate	3-Methylbutyl 3-methylbutanoate Isopentyl 3-methylbutanoate 3-methylbutanoic acid isopentyl ester 3-methylbutyric acid isoamyl ester 659-70-1 3-Methylbutyl 3-methylbutyrate Apple oil Butanoic acid, 3-methyl-, 3-methylbutyl ester Isoamyl valerianate Isopentyl 3-methylbutyrate Isopentyl isovalerate Isovaleric acid, isopentyl ester NSC6565 Solusterol WLN: 1Y1&2OV1Y1&1 iso-Amyl isovalerate LS-2395 4-…	659-70-1
CCCC(=O)OCCC(C)C	3-Methylbutyl butanoate	3-Methylbutyl butanoate Isopentyl butanoate butanoic acid isopentyl ester butyric acid isoamyl ester 106-27-4 LS-2364 W206008_ALDRICH W206016_ALDRICH InChI=1/C9H18O2/c1-4-5-9(10)11-7-6-8(2)3/h8H,4-7H2,1-3H 3-Methylbutyl butyrate Butanoic acid, 3-methylbutyl ester Butyric acid, isopentyl ester Isoamyl butanoate Isoamyl butylate Isoamyl butyrate Isopentyl butyrate NSC6548 4-02-00-00791 (Beilstein H…	106-27-4
CC(C)CCOC=O	3-Methylbutyl formate	3-Methylbutyl formate Isopentyl formate formic acid isopentyl ester formic acid isoamyl ester 3-methylbutyl methanoate 110-45-2 ST5409681 06530_FLUKA InChI=1/C6H12O2/c1-6(2)3-4-8-5-7/h5-6H,3-4H2,1-2H 3-Methyl-1-butyl formate 4-02-00-00030 (Beilstein Handbook Reference) AI3-15291 BRN 1739893 EINECS 203-769-2 FEMA No. 2069 NSC 6530 C12293 Isoamyl formate W206903_ALDRICH 1-Butanol, 3-methyl-, format…	110-45-2
CCCCCC(=O)OCCC(C)C		3-Methylbutyl hexanoate Isopentyl hexanoate hexanoic acid isopentyl ester hexanoic acid isoamyl ester 2198-61-0 3-02-00-00727 (Beilstein Handbook Reference) AI3-00573 BRN 1760611 EINECS 218-600-8 FEMA No. 2075 Hexanoic acid, 3-methylbutyl ester Hexanoic acid, isopentyl ester ISOAMYL HEXANOATE Isoamyl caproate Isoamyl hexanoate (natural) Isopentyl alcohol, hexanoate Isopentyl caproate Isopentyl-n-…	2198-61-0
CCC(=O)OCCC(C)C	3-Methylbutyl propanoate	3-Methylbutyl propanoate Isopentyl propanoate propanoic acid isopentyl ester propionic acid isoamyl ester 105-68-0 LS-2362 3-Methyl-1-butyl propanoate 4-02-00-00709 (Beilstein Handbook Reference) AI3-33594 BRN 1747359 EINECS 203-322-1 FEMA No. 2082 Isoamyl propionate (natural) NSC 7932 iso-Pentyl propionate 1-Butanol, 3-methyl-, propanoate 3-Methylbutyl propionate Isoamyl propanoate Isoamyl propi…	105-68-0
CCCCCC(C)(C=C)OC(C)=O	3-Methyloct-1-en-3-yl acetate	3-Methyloct-1-en-3-yl acetate (1-methyl-1-vinyl-hexyl) acetate acetic acid (1-methyl-1-vinylhexyl) ester acetic acid (1-amyl-1-methyl-prop-2-enyl) ester 3-methyloct-1-en-3-yl ethanoate 66008-66-0 EINECS 266-057-0 1-Octen-3-ol, 3-methyl-, acetate 3-Methyl-1-octen-3-yl acetate	66008-66-0
CC(CC=O)c1ccccc1	3-Phenylbutanal	3-Phenylbutanal 3-Phenylbutyraldehyde 108211-22-9 16251-77-7 65885-41-8 289027_ALDRICH .+/-.-3-Phenylbutyraldehyde Benzenepropanal, .beta.-methyl- InChI=1/C10H12O/c1-9(7-8-11)10-5-3-2-4-6-10/h2-6,8-9H,7H2,1H 3-Methyl-3-phenylpropanal Benzenepropanal, beta-methyl- EINECS 240-362-9
OCCCc1ccccc1	3-Phenylpropan-1-ol	3-Phenylpropan-1-ol 122-97-4 1335-12-2 W288500_ALDRICH 3-PHENYL-PROPAN-(1)-OL InChI=1/C9H12O/c10-8-4-7-9-5-2-1-3-6-9/h1-3,5-6,10H,4,7-8H 140856_ALDRICH 1-Propanol, phenyl- 79000_FLUKA NCGC00165987-01 1-Hydroxy-3-phenylpropane 3-Phenyl-1-propanol (natural) 3-Phenylpropanol-1 4-06-00-03198 (Beilstein Handbook Reference) AI3-02067 BRN 1857542 Benzylethyl alcohol CCRIS 3200 Dihydrocinnamal alcohol EI…	122-97-4 1335-12-2
CC(C)C(=O)OCCCc1ccccc1		3-Phenylpropyl 2-methylpropanoate 103-58-2 Propanoic acid, 2-methyl-, 3-phenylpropyl ester WLN: 1Y1&VO3R Phenylpropyl 2-methylpropanoate, beta- Phenylpropyl isobutyrate NSC404455 NSC 404455 4-06-00-03201 (Beilstein Handbook Reference) ZINC01687400 ST5405478 BRN 2454387 Hydrocinnamyl 2-methylpropanoate FEMA No. 2893 EINECS 203-125-0 W289302_ALDRICH 3-Phenylpropyl isobutyrate (natural) 3-Phenylprop…
CC(=O)OCCCc1ccccc1	3-Phenylpropyl acetate	3-Phenylpropyl acetate acetic acid 3-phenylpropyl ester 3-phenylpropyl ethanoate 122-72-5 1335-15-5 143601-14-3 ZINC01597265 Benzenepropyl acetate W289000_ALDRICH .gamma.-Phenylpropyl acetate NSC404453 WLN: 1VO3R (3-Acetoxypropyl)benzene 1-Acetoxy-3-phenylpropane 1-PROPANOL, 3-PHENYL-, ACETATE 3-Acetoxy-1-phenylpropane 3-Phenyl-1-propanol, acetate 3-Phenyl-1-propyl acetate 3-Phenylpropyl acetate …	122-72-5 1335-15-5 143601-14-3
O=COCCCc1ccccc1	3-Phenylpropyl formate	3-Phenylpropyl formate formic acid 3-phenylpropyl ester 3-Phenylpropyl methanoate 104-64-3 .gamma.-Phenylpropylformate 1-Propanol, 3-phenyl-, formate 3-Phenyl-1-propyl formate Benzenepropanol, formate Hydrocinnamyl formate NSC6010 Phenylpropyl formate WLN: VHO3R 1-Phenyl-3-formyloxypropane AI3-18532 BRN 2501915 EINECS 203-222-8 FEMA No. 2895 Hydrocinnamyl methanoate NSC 6010 gamma-Phenylpropyl fo…	104-64-3
CCC(=O)OCCCc1ccccc1	3-Phenylpropyl propanoate	3-Phenylpropyl propanoate propanoic acid 3-phenylpropyl ester propionic acid 3-phenylpropyl ester 122-74-7 3-Phenyl-1-propanol propionate AI3-18535 BRN 3272005 EINECS 204-571-9 FEMA No. 2897 Hydrocinnamyl propionate 1-Propanol, 3-phenyl-, propionate 3-Phenylpropyl propionate Benzenepropanol, propanoate NSC6032 NSC 6032 Phenylpropyl propionate 3-Phenyl propyl propionate W289701_ALDRICH ST5410149	122-74-7
C=CCSSCC=C		3-prop-2-enyldisulfanylprop-1-ene 3-allyldisulfanylprop-1-ene 2179-57-9 3,3'-disulfanediylbis(prop-1-ene) 3,3'-dithiobis(prop-1-ene) 3-(allyldisulfanyl)-1-propene 3-(prop-2-en-1-yldisulfanyl)prop-1-ene CHEBI:4488 Allyl disulfide Diallyl disulphide Disulfide, di-2-propenyl NSC29228 ZINC01531082 C08369 Diallyl disulfide SPECTRUM1505174 NCI60_002410 317691_ALDRICH 32621_FLUKA 2-Propenyl disulfide 2-…	2179-57-9
C=CCSCC=C	3-prop-2-enylsulfanylprop-1-ene	3-prop-2-enylsulfanylprop-1-ene 3-allylsulfanylprop-1-ene 3-(allylthio)prop-1-ene 132879-26-6 592-88-1 Spectrum3_001991 Spectrum2_000837 NCGC00095345-01 A35801_ALDRICH SPBio_000793 2-Propenyl sulphide 3,3-Thiobis(1-propene) 4-01-00-02097 (Beilstein Handbook Reference) AI3-18865 BRN 1736016 CCRIS 3252 Diallyl sulphide EINECS 209-775-1 FEMA No. 2042 NSC 20947 ZINC01531083 Allyl sulfide C08370 Diall…
CCCOCCCO		3-propoxypropan-1-ol 30136-13-1 EINECS 250-069-8 Propanol, 1(or 2)-propoxy- Propasol P Propoxypropanol Propylene glycol monopropyl ether n-Propoxypropanol n-Propoxypropanol (mixed isomers)
CCCSSCC=C	3-propyldisulfanylprop-1-ene	3-propyldisulfanylprop-1-ene 2179-59-1 4,5-Dithia-1-octene ALLYL PROPYL DISULFIDE Allyl propyl disulphide BRN 1744005 CCRIS 4571 Disulfide, 2-propenyl propyl Disulfide, allyl propyl EINECS 218-550-7 HSDB 2519 Propenyl propyl disulfide APDS 3-(propyldithio)prop-1-ene	2179-59-1
O=C1OCCC1S		3-sulfanyloxolan-2-one 3-sulfanyltetrahydrofuran-2-one 3-mercapto-2-tetrahydrofuranone 3-mercaptotetrahydrofuran-2-one 14032-62-3 Butyric acid, 4-hydroxy-2-mercapto-, .gamma.-lactone Butyric acid, 4-hydroxy-2-mercapto-, gamma-lactone
OC(=O)CCS	3-sulfanylpropanoic acid	3-sulfanylpropanoic acid 3-Mercaptopropanoic acid 3-Mercaptopropionic acid 68307-97-1 107-96-0 30232-12-3 2-Mercaptoethanecarboxylic acid 3-Mercaptopropionate 3-Thiopropanoic acid 3MPA 4-03-00-00726 (Beilstein Handbook Reference) AI3-26090 BRN 0773807 EINECS 203-537-0 HSDB 5381 NSC 437 Propionic acid, 3-mercpato- beta-Mercaptopropanoic acid beta-Mercaptopropionic acid beta-Thiopropionic acid .bet…	68307-97-1 107-96-0 30232-12-3
CCO[Si](CCCN)(OCC)OCC	3-triethoxysilylpropan-1-amine	3-triethoxysilylpropan-1-amine 3-triethoxysilylpropylamine 106096-79-1 12738-50-0 131641-77-5 143178-71-6 159778-17-3 204987-58-6 60000-97-7 71618-18-3 86836-28-4 919-30-2 96726-79-3 Silane amg-9 Silane, (3-aminopropyl)triethoxy- Silane, gamma-aminopropyltriethoxy- Silicone A-1100 Triethoxy(3-aminopropyl)silane Uc-A 1100 gamma-Aminopropyltriethoxysilane 3-(triethoxysilyl)propan-1-amine WLN: Z3-SI…	106096-79-1 12738-50-0 131641-77-5 143178-71-6 159778-17-3 204987-58-6 60000-97-7 71618-18-3 86836-28-4 919-30-2 96726-79-3
CC(=C)C(=O)OCCC[Si](OC)(OC)OC		3-trimethoxysilylpropyl 2-methylprop-2-enoate 2-methylprop-2-enoic acid 3-trimethoxysilylpropyl ester 2-methylacrylic acid 3-trimethoxysilylpropyl ester 82658-67-1 85256-86-6 96353-41-2 100662-14-4 114266-32-9 201732-58-3 2530-85-0 65323-94-6 65323-95-7 65324-72-3 79642-98-1 NCGC00164369-01 440159_ALDRICH Dow Corning product Z-6030 Silane A174 .alpha.-Methylacryloxypropyltrimethoxysilane .gamma.-…	82658-67-1 85256-86-6 96353-41-2 100662-14-4 114266-32-9 201732-58-3 2530-85-0 65323-94-6 65323-95-7 65324-72-3 79642-98-1
CC(=O)CCc1ccc2OCOc2c1		4-(1,3-Benzodioxol-5-yl)butan-2-one 55418-52-5 FR-0502 W270105_ALDRICH NSC405365 3,4-Methylenedioxybenzylacetone ZERO/000232 2-Butanone, 4-(1,3-benzodioxol-5-yl)- 4-(3,4-Methylenedioxyphenyl)-2-butanone AI3-20251 EINECS 259-630-1 FEMA No. 2701 NSC 405365 ZINC00052601
CN(C)c1ccc(cc1)N=[N+]=C1N(C)C=CN1C	4-(1,3-dimethylimidazol-1-ium-2-yl)diazenyl-N,N-dimethylaniline	4-(1,3-dimethylimidazol-1-ium-2-yl)diazenyl-N,N-dimethylaniline 4-(1,3-dimethylimidazol-1-ium-2-yl)azo-N,N-dimethyl-aniline 4-[(1,3-dimethyl-2-imidazol-1-iumyl)azo]-N,N-dimethylaniline [4-(1,3-dimethylimidazol-1-ium-2-yl)azophenyl]-dimethyl-amine 4-(1,3-dimethylimidazol-1-ium-2-yl)diazenyl-N,N-dimethyl-aniline
Oc1ccc(NCCO)c(c1)N(=O)=O	4-(2-hydroxyethylamino)-3-nitrophenol	4-(2-hydroxyethylamino)-3-nitrophenol 4-(2-hydroxyethylamino)-3-nitro-phenol 65235-31-6 EINECS 265-648-0 Phenol, 4-((2-hydroxyethyl)amino)-3-nitro- 3-Nitro-p-hydroxyethylaminophenol 4-((2-Hydroxyethyl)amino)-3-nitrophenol	65235-31-6
CC(O)CNc1ccc(O)cc1N(=O)=O	4-(2-hydroxypropylamino)-3-nitrophenol	4-(2-hydroxypropylamino)-3-nitrophenol 4-(2-hydroxypropylamino)-3-nitro-phenol
CC(=C)C(=O)OCCCCOC(=O)C(C)=C	4-(2-methylprop-2-enoyloxy)butyl 2-methylprop-2-enoate	4-(2-methylprop-2-enoyloxy)butyl 2-methylprop-2-enoate 2-methylprop-2-enoic acid 4-(2-methyl-1-oxoprop-2-enoxy)butyl ester 2-methylacrylic acid 4-methacryloyloxybutyl ester 151896-80-9 2082-81-7 148390-75-4 X 970 234958_ALDRICH 1,4-BUTANEDIOL DIMETHACRYLATE 1,4-Butylene dimethacrylate 1,4-Butylene glycol dimethacrylate 2-Propenoic acid, 2-methyl-, 1,4-butanediyl ester Butanediol dimethacrylate Bu…	151896-80-9 2082-81-7 148390-75-4
CC(=O)CCc1ccc(O)cc1	4-(4-Hydroxyphenyl)butan-2-one	4-(4-Hydroxyphenyl)butan-2-one 5471-51-2 1-(4-Hydroxyphenyl)-3-butanone 4-(3-Oxobutyl)phenol 4-(p-Hydroxyphenyl)-2-butanone (natural) 4-08-00-00506 (Beilstein Handbook Reference) AI3-31812 BRN 0776080 EINECS 226-806-4 FEMA No. 2588 Hydroxyphenylbutanone, p- NSC 26515 Rasketone p-Hydroxybenzyl acetone 56110_FLUKA ZINC00154632 (p-Hydroxybenzyl)acetone 1-(p-Hydroxyphenyl)-3-butanone 2-Butanone, 4-(4…	5471-51-2
Oc1ccc(cc1)Nc1ccccc1N(=O)=O	4-[(2-nitrophenyl)amino]phenol	4-[(2-nitrophenyl)amino]phenol 54381-08-7 4-((2-Nitrophenyl)amino)phenol EINECS 259-132-4 HC Orange no. 1 Phenol, 4-((2-nitrophenyl)amino)- p-((o-Nitrophenyl)amino)phenol MS-3693 ZINC04054876 4-(2-nitroanilino)benzenol MLS000736169 SMR000338719 2-Nitro-4'-hydroxydiphenylamine	54381-08-7
OC(=O)CCC(=O)OCCOCCO		4-[2-(2-hydroxyethoxy)ethoxy]-4-oxobutanoic acid 4-[2-(2-hydroxyethoxy)ethoxy]-4-oxo-butanoic acid 4-[2-(2-hydroxyethoxy)ethoxy]-4-keto-butyric acid 9050-18-4 Butanedioic acid, ester with 2,2'-oxybis(ethanol) Diethylene glycol succinate EINECS 232-938-3	9050-18-4
CC(=C)C(=O)OCCOC(=O)C=CC(O)=O		4-[2-(2-methylprop-2-enoyloxy)ethoxy]-4-oxobut-2-enoic acid (E)-4-[2-(2-methylprop-2-enoyloxy)ethoxy]-4-oxobut-2-enoic acid 4-[2-(2-methylprop-2-enoyloxy)ethoxy]-4-oxo-but-2-enoic acid (E)-4-[2-(2-methylprop-2-enoyloxy)ethoxy]-4-oxo-but-2-enoic acid (E)-4-[2-(2-methyl-1-oxoprop-2-enoxy)ethoxy]-4-oxobut-2-enoic acid 4-[2-(2-methyl-1-oxoprop-2-enoxy)ethoxy]-4-oxobut-2-enoic acid (E)-4-keto-4-(2-met…
CC1(C)c2c3ccccc3ccc2[N+](CCCCS(O)(=O)=O)=C1C=CC=CC=CC=C1N(CCCCS(O)(=O)=O)c2ccc3ccccc3c2C1(C)C		4-[2-[(1Z,3E,5E,7Z)-7-[1,1-dimethyl-3-(4-sulfobutyl)benzo[e]indol-2-ylidene]hepta-1,3,5-trienyl]-1,1-dimethylbenzo[e]indol-3-ium-3-yl]butane-1-sulfonic acid 4-[2-[(1E,3E,5E,7Z)-7-[1,1-dimethyl-3-(4-sulfobutyl)benzo[e]indol-2-ylidene]hepta-1,3,5-trienyl]-1,1-dimethylbenzo[e]indol-3-ium-3-yl]butane-1-sulfonic acid 4-[2-[7-[1,1-dimethyl-3-(4-sulfobutyl)benzo[e]indol-2-ylidene]hepta-1,3,5-trienyl]-1,…
CCCCCCC(O)CC=CCCCCCCCC(=O)NCCOC(=O)C(CC(O)=O)S(O)(=O)=O	4-[2-[[(E)-12-hydroxyoctadec-9-enoyl]amino]ethoxy]-4-oxo-3-sulfobutanoic acid	4-[2-[[(E)-12-hydroxyoctadec-9-enoyl]amino]ethoxy]-4-oxo-3-sulfobutanoic acid 4-[2-[[(E)-12-hydroxyoctadec-9-enoyl]amino]ethoxy]-4-oxo-3-sulfo-butanoic acid 4-[2-[[(E)-12-hydroxy-1-oxooctadec-9-enyl]amino]ethoxy]-4-oxo-3-sulfobutanoic acid 4-[2-[[(E)-12-hydroxyoctadec-9-enoyl]amino]ethoxy]-4-keto-3-sulfo-butyric acid
CCCCCCCCC=CCCCCCCCC(=O)NCCOCCOC(=O)CC(C(O)=O)S(O)(=O)=O		4-[2-[2-[[(E)-octadec-9-enoyl]amino]ethoxy]ethoxy]-4-oxo-2-sulfobutanoic acid 4-[2-[2-(octadec-9-enoylamino)ethoxy]ethoxy]-4-oxo-2-sulfobutanoic acid 4-[2-[2-(octadec-9-enoylamino)ethoxy]ethoxy]-4-oxo-2-sulfo-butanoic acid 4-[2-[2-[[(E)-octadec-9-enoyl]amino]ethoxy]ethoxy]-4-oxo-2-sulfo-butanoic acid 4-oxo-4-[2-[2-(1-oxooctadec-9-enylamino)ethoxy]ethoxy]-2-sulfobutanoic acid 4-oxo-4-[2-[2-[[(E)-1…
Nc1cc(N)c(cc1)OCCCOc1ccc(N)cc1N	4-[3-(2,4-diaminophenoxy)propoxy]benzene-1,3-diamine	4-[3-(2,4-diaminophenoxy)propoxy]benzene-1,3-diamine [5-amino-2-[3-(2,4-diaminophenoxy)propoxy]phenyl]amine
[H]/N=C(/N)\c1ccc(cc1)OCCCCCCOc1ccc(cc1)/C(/N)=N\[H]	4-[6-(4-carbamimidoylphenoxy)hexoxy]benzenecarboximidamide	4-[6-(4-carbamimidoylphenoxy)hexoxy]benzenecarboximidamide 4-[6-(4-carbamimidoylphenoxy)hexoxy]benzamidine 4-[6-(4-amidinophenoxy)hexoxy]benzamidine 3811-75-4 Hexamidine 1,6-Di(4-amidinophenoxy)hexane AIDS-007073 AIDS007073 4,4'-(1,6-Hexanediylbis(oxy))bis-benzenecarboximidamide Benzenecarboximidamide, 4,4'-(1,6-hexanediylbis(oxy))bis- Hexamidina [INN-Spanish] Hexamidine [DCF:INN] Hexamidinum [IN…	3811-75-4
NC1C=CN(C2OC(CO)C(O)C2O)C(=O)N=1	4-amino-1-[3,4-dihydroxy-5-(hydroxymethyl)oxolan-2-yl]pyrimidin-2-one	4-amino-1-[3,4-dihydroxy-5-(hydroxymethyl)oxolan-2-yl]pyrimidin-2-one 4-amino-1-[3,4-dihydroxy-5-(hydroxymethyl)tetrahydrofuran-2-yl]pyrimidin-2-one 4-amino-1-[3,4-dihydroxy-5-(hydroxymethyl)-2-tetrahydrofuranyl]-2-pyrimidinone 4-amino-1-(3,4-dihydroxy-5-methylol-tetrahydrofuran-2-yl)pyrimidin-2-one 65-46-3 7428-39-9 NCGC00094638-03 ChemDiv1_027335 SMP2_000209 1.beta.-D-Ribofuranosylcytosine NCI6…
NC1C=CNC(=O)N=1	4-amino-3H-pyrimidin-2-one	4-amino-3H-pyrimidin-2-one 71-30-7 118511-36-7 14987-28-1 26661-23-4 504-05-2 66322-75-6 AIDS-023056 AIDS023056 NCI60_012445 InChI=1/C4H5N3O/c5-3-1-2-6-4(8)7-3/h1-2H,(H3,5,6,7,8 AI3-52281 CYTOSINE NSC 27787 2(1H)-Pyrimidinone, 4-amino- (9CI) 4-amino-2-oxo-1,2-dihydropyrimidine EINECS 200-749-5 30430_FLUKA 4-aminopyrimidin-2(1H)-one CHEBI:16040 Cytosin Zytosin 2(1H)-Pyrimidinone, 4-amino- 4-Amino-…
Nc1ccc(O)cc1N(=O)=O	4-Amino-3-nitrophenol	4-Amino-3-nitrophenol 4-amino-3-nitro-phenol 610-81-1 08935_FLUKA 4-Hydroxy-2-nitroaniline ZINC04262549 3-Nitro-4-aminophenol EINECS 210-236-8 249319_ALDRICH Phenol, 4-amino-3-nitro- NSC 400380 Phenol, 4-amino-3-nitro NSC400380
CC(CC(CC)C(N)=O)C(O)=O		4-carbamoyl-2-methylhexanoic acid 4-carbamoyl-2-methyl-hexanoic acid 4-aminocarbonyl-2-methyl-hexanoic acid
Oc1ccc(Cl)cc1Sc1cc(Cl)ccc1O	4-chloro-2-(5-chloro-2-hydroxyphenyl)sulfanylphenol	4-chloro-2-(5-chloro-2-hydroxyphenyl)sulfanylphenol 4-chloro-2-(5-chloro-2-hydroxy-phenyl)sulfanyl-phenol 4-chloro-2-[(5-chloro-2-hydroxyphenyl)thio]phenol 4-chloro-2-[(5-chloro-2-hydroxy-phenyl)thio]phenol 97-24-5 D 25 D 25-Antimykotikum Fentichlor Fenticlor HL 1050 Meflorin NSC4112 Novex Oksid Ovitrol Ph 549 Phenol, 2,2'-thiobis[4-chloro- S 7 S 7 (antimycotic) WLN: QR DG BSR BQ EG component of …	97-24-5
COc1cc(C=C)ccc1O	4-ETHENYL-2-METHOXYPHENOL	4-ETHENYL-2-METHOXYPHENOL 2-METHOXY-4-VINYL-PHENOL 2-Methoxy-4-vinylphenol 4-ethenyl-2-methoxy-phenol 7786-61-0 31853-85-7 LS-2530 EUG W267511_ALDRICH 3-06-00-04981 (Beilstein Handbook Reference) 4-Hydroxy-3-methoxystyrene 4-Hydroxy-3-methoxyvinylbenzene BRN 2044521 CCRIS 548 EINECS 232-101-2 4-vinylguaiacol CPD-1072 Phenol, 2-methoxy-4-vinyl- Phenol, 4-ethenyl-2-methoxy- Vinylcatechol-O-methyl e…	7786-61-0 31853-85-7
CCc1ccc(C=O)cc1	4-ETHYLBENZALDEHYDE	4-ETHYLBENZALDEHYDE 4748-78-1 53951-50-1 Ethyl benzaldehyde ST5213337 BENZALDEHYDE,4-ETHYL InChI=1/C9H10O/c1-2-8-3-5-9(7-10)6-4-8/h3-7H,2H2,1H Benzaldehyde, 4-ethyl- Benzaldehyde, P-ethyl- EINECS 225-268-8 Ethylbenzaldehyde, p- FEMA No. 3756 ZINC02003388 233633_ALDRICH Benzaldehyde, ethyl- ETHYLBENZALDEHYDE W375608_ALDRICH p-Ethylbenzaldehyde	4748-78-1 53951-50-1
Cc1cc(F)c(N)cc1N	4-fluoro-6-methylbenzene-1,3-diamine	4-fluoro-6-methylbenzene-1,3-diamine 4-fluoro-6-methyl-benzene-1,3-diamine (5-amino-4-fluoro-2-methyl-phenyl)amine
CCC(=O)OCCCCO	4-hydroxybutyl propanoate	4-hydroxybutyl propanoate propanoic acid 4-hydroxybutyl ester propionic acid 4-hydroxybutyl ester
COCCC(C)(C)S	4-Methoxy-2-methylbutane-2-thiol	4-Methoxy-2-methylbutane-2-thiol 4-methoxy-2-methyl-butane-2-thiol 94087-83-9 4-Methoxy-2-methyl-2-butanethiol 4-Methoxy-2-methyl-2-mercaptobutane EINECS 301-977-9 2-Butanethiol, 4-methoxy-2-methyl-
COc1ccc(C=O)cc1		4-Methoxybenzaldehyde 26249-15-0 68894-36-0 123-11-5 50984-52-6 W267007_ALDRICH LS-2093 Anisaldehyde solution SRA1_SIAL 97063_FLUKA Aub+ pine BENZALDEHYDE,4-METHOXY MFC8 H8 O2 AI3-00223 CCRIS 821 Caswell No. 051E EINECS 204-602-6 FEMA No. 2670 Formylanisole, p- HSDB 2641 NSC 5590 p-Methoxybenzaldehyde (natural) NCGC00090807-01 ST5213373 4-Anisaldehyde ANISALDEHYDE Anisic aldehyde Aubepine Benzald…	26249-15-0 68894-36-0 123-11-5 50984-52-6
COc1ccc(cc1)C#N	4-Methoxybenzonitrile	4-Methoxybenzonitrile 874-90-8 721942-48-9 p-Anisylnitrile p-Cyanoanisole p-Methoxyphenyl cyanide p-Anisonitrile (8CI) 1-methoxy-4-cyano-benzene InChI=1/C8H7NO/c1-10-8-4-2-7(6-9)3-5-8/h2-5H,1H NSC71539 NCIOpen2_000576 T5215384 ZINC00159092 132470_ALDRICH AI3-11801 EINECS 212-871-6 NSC 3777 NSC 71539 4-Cyanoanisole Benzonitrile, 4-methoxy- NSC3777 P-METHOXYBENZONITRILE p-Anisonitrile
COCCCC=C1CCCCC1		4-methoxybutylidenecyclohexane 93777-41-4 (4-Methoxybutylidene)cyclohexane Cyclohexane, (4-methoxybutylidene)- EINECS 298-072-3	93777-41-4
CC1CCNc2ccccc21		4-methyl-1,2,3,4-tetrahydroquinoline 19343-78-3 74459-14-6 1,2,3,4-Tetrahydro-4-methylquinoline 1,2,3,4-Tetrahydrolepidine AI3-22251 EINECS 242-977-8 Lepidine, 1,2,3,4-tetrahydro- Quinoline, 1,2,3,4-tetrahydro-4-methyl-	19343-78-3 74459-14-6
CC(C1OCC(C)O1)c1ccccc1		4-Methyl-2-(1-phenylethyl)-1,3-dioxolane 67634-23-5 1,3-Dioxolane, 4-methyl-2-(1-phenylethyl)- 4-Methyl-2-(1-phenylethyl)-1,3-dioxolan NSC39434 2-(alpha-Methylbenzyl)-4-methyl-1,3-dioxolane 2-Phenylpropanal propylene glycol acetal 2-Phenylpropionaldehyde propylene glycol acetal 4-Methyl-2-(alpha-methylbenzyl)-1,3-dioxolane EINECS 266-828-1 Hydratropaldehyde propyleneglycol acetal Hydratropic alde…	67634-23-5
CN1(=O)CCOCC1		4-methyl-4-oxidomorpholin-4-ium 4-methyl-4-oxido-morpholin-4-ium 7529-22-8 70187-32-5 4-Methyl-1,4.lambda.~5~-oxazinan-4-ol AIDS-125463 AIDS125463 NCIOpen2_000398 4-Methylmorpholine 4-oxide monohydrate 4-Methylmorpholine N-oxide 4-Methylmorpholine-4-oxide EINECS 231-391-8 Methyl morpholine oxide NSC 73198 NSC 82153 NSC73198 258822_ALDRICH 4-Methylmorpholine N-oxide solution NMO solution Morpholin…	7529-22-8 70187-32-5
CC(=O)CC(C)(C)c1ccccc1		4-Methyl-4-phenylpentan-2-one 4-methyl-4-phenyl-pentan-2-one 7403-42-1 EINECS 231-007-9 4-Methyl-4-phenyl-2-pentanone NSC 54368 NSC 200696 NSC200696 2-Pentanone, 4-methyl-4-phenyl- 4-Phenyl-4-methylpentan-2-one Methyl 2-methyl-2-phenylpropyl ketone NSC54368 ST5410612 AI3-24796
CC(C)=CC(C)=O	4-Methylpent-3-en-2-one	4-Methylpent-3-en-2-one 141-79-7 2,2-Dimethylvinyl methyl ketone 2-Methyl-2-pentenone-4 2-Methyl-4-oxo-2-pentene 4-01-00-03471 (Beilstein Handbook Reference) 4-Methyl-3-penten-2-on [Dutch, German] 4-Metil-3-penten-2-one [Italian] AI3-07702 BRN 1361550 Caswell No. 547 EINECS 205-502-5 EPA Pesticide Chemical Code 052401 FEMA No. 3368 FEMA Number 3368 HSDB 1195 Isopropylidene acetone Mesityl oxide […	141-79-7
CC(=C)CC(C)OC(=O)C(C)C	4-methylpent-4-en-2-yl 2-methylpropanoate	4-methylpent-4-en-2-yl 2-methylpropanoate 1,3-dimethylbut-3-enyl 2-methylpropanoate 2-methylpropanoic acid 1,3-dimethylbut-3-enyl ester 2-methylpropionic acid 1,3-dimethylbut-3-enyl ester 80118-06-5 Propanoic acid, 2-methyl-, 1,3-dimethyl-3-butenyl ester 1,3-Dimethylbut-3-enyl isobutyrate 2-Methyl-propanoic acid, 1,3-dimethyl-3-butenyl ester EINECS 279-399-0	80118-06-5
CC(C)CC(C)=O	4-Methylpentan-2-one	4-Methylpentan-2-one 108-10-1 Methyl isobutyl ketone (NF) Isopropyl acetone NSC 5712 2-PENTANONE,4-METHYL METHYL,ISOBUTYL,KETONE Methyl isobutyl ketone [UN1245] [Flammable liquid] 58600_FLUKA Methyl-isobutyl-cetone [French] 4-01-00-03305 (Beilstein Handbook Reference) 4-Methyl-2-pentanon [Czech] 4-Methyl-2-pentanone (natural) 4-Methyl-pentan-2-on [Dutch, German] 4-Metilpentan-2-one [Italian] AI3-…
CC(C)CC(C)OC(=O)C=CC	4-methylpentan-2-yl (E)-but-2-enoate	4-methylpentan-2-yl (E)-but-2-enoate 1,3-dimethylbutyl (E)-but-2-enoate (E)-but-2-enoic acid 1,3-dimethylbutyl ester 35206-51-0 1,3-Dimethylbutyl 2-butenoate 2-Butenoic acid, 1,3-dimethylbutyl ester EINECS 252-438-9 Methylisobutylcarbinyl crotonate	35206-51-0
Nc1cc(ccc1N)N(=O)=O		4-nitrobenzene-1,2-diamine (2-amino-5-nitro-phenyl)amine 99-56-9 4-13-00-00075 (Beilstein Handbook Reference) 4-Nitro-1,2-fenylendiamin [Czech] 4-Nitro-o-phenylene-diamine 4-Nitro-para-phenylenediamine 4-Nitrophenylenediamine 4NDB AI3-52605 BRN 0608106 CCRIS 451 CI 76020 EINECS 202-766-3 HSDB 2895 NSC 5378 NCGC00091593-02 73630_FLUKA 108898_ALDRICH InChI=1/C6H7N3O2/c7-5-2-1-4(9(10)11)3-6(5)8/h1-3…	99-56-9
Oc1ccc(cc1)N(=O)=O	4-Nitrophenol	4-Nitrophenol 100-02-7 40056_SUPELCO 4-Hydroxynitrobenzene Niphen 4-Nitrofenol PNP NSC1317 Paranitrofenol Paranitrofenolo Paranitrophenol Phenol, 4-nitro- Phenol, p-nitro- WLN: WNR DQ p-Hydroxynitrobenzene NPO 4-Nitrophenol-UL-14C ST5214472 N2767_SIGMA 48549_SUPELCO SGCUT00249 35836_RIEDEL P-NITROPHENOL InChI=1/C6H5NO3/c8-6-3-1-5(2-4-6)7(9)10/h1-4,8 PHENOL,4-NITRO 4-Nitrofenol [Dutch] AI3-04856 C…	100-02-7
C=CCCCCCCCCC(=O)NCCOC(=O)CC(C(O)=O)S(O)(=O)=O		4-oxo-2-sulfo-4-[2-(undec-10-enoylamino)ethoxy]butanoic acid 4-oxo-4-[2-(1-oxoundec-10-enylamino)ethoxy]-2-sulfobutanoic acid 4-keto-2-sulfo-4-[2-(undec-10-enoylamino)ethoxy]butyric acid
CC(=O)CCC(O)=O		4-Oxopentanoic acid 4-Ketovaleric acid 123-76-2 PENTANOIC ACID,4-OXO MFC5 H8 O3 4-oxo-pentanoic acid LMFA01060006 Laevulinsaeure ST5213942 .beta.-Acetylpropionic acid .gamma.-Ketovaleric acid 3-Acetylpropionic acid 4-Oxovaleric acid Acetopropionic acid LEVA Laevulinic acid Levulic acid Levulinic acid NSC3716 Pentanoic acid, 4-oxo- Propionic acid, 3-acetyl- Usaf cz-1 VALERIC ACID, 4-OXO-(LEVULINIC…	123-76-2
CC(C)c1ccc(C=O)cc1		4-propan-2-ylbenzaldehyde 4-isopropylbenzaldehyde 122-03-2 C06577 ZINC00968248 ST5213395 135178_ALDRICH 4-(1-Methylethyl)benzaldehyde 4-07-00-00723 (Beilstein Handbook Reference) 4-Isopropylbenzenecarboxylate AI3-01853 BRN 0636547 EINECS 204-516-9 FEMA No. 2341 NSC 4886 p-Isopropylbenzenecarboxaldehyde CPD-1003 cumaldehyde cuminal cuminaldehyde cuminic aldehyde p-cumic aldehyde InChI=1/C10H12O/c1…	122-03-2
CC(C)c1ccc(cc1)C#N	4-propan-2-ylbenzonitrile	4-propan-2-ylbenzonitrile 4-Isopropylbenzonitrile 13816-33-6 EINECS 237-492-3 p-Cyanocumene p-Isopropylbenzonitrile SB 00932 ZINC02019441 3-Isopropylbenzonitrile 4-(1-Methylethyl)benzonitrile 4-09-00-01846 (Beilstein Handbook Reference) BENZONITRILE, p-ISOPROPYL- BRN 1932883 Benzonitrile, 4-(1-methylethyl)- Cuminic nitrile Cuminonitrile Cuminyl nitrile	13816-33-6
CC(C)(C)c1ccc(C=O)cc1	4-tert-Butylbenzaldehyde	4-tert-Butylbenzaldehyde 34032-41-2 939-97-9 AI3-37199 Benzaldehyde, 4-(1,1-dimethylethyl)- 19567_FLUKA EINECS 213-367-9 SBB008564 384038_ALDRICH p-t-Butylbenzaldehyde InChI=1/C11H14O/c1-11(2,3)10-6-4-9(8-12)5-7-10/h4-8H,1-3H ZINC01845477 4-(1,1-Dimethylethyl)-benzaldehyde AIDS-081349 AIDS081349 Benzaldehyde, p-tert-butyl-	34032-41-2 939-97-9
O=C(CCCCc1ccc2OCOc2c1)N1CCCCC1		5-(1,3-benzodioxol-5-yl)-1-piperidin-1-ylpentan-1-one 5-(1,3-benzodioxol-5-yl)-1-(1-piperidyl)pentan-1-one 5-(1,3-benzodioxol-5-yl)-1-piperidino-pentan-1-one 5-(1,3-benzodioxol-5-yl)-1-piperidin-1-yl-pentan-1-one 1-[5-(1,3-Benzodioxol-5-yl)pentanoyl]piperidine Piperidine, 1-[5-(1,3-benzodioxol-5-yl)-1-oxopentyl]-
Cc1ccc(cc1O)NCCO	5-(2-hydroxyethylamino)-2-methylphenol	5-(2-hydroxyethylamino)-2-methylphenol 5-(2-hydroxyethylamino)-2-methyl-phenol 55302-96-0 1-Methyl-2-hydroxy-4-(beta-hydroxyethyl)aminobenzene 2-Hydroxy-4-(beta-hydroxyethyl)aminotoluene 2-Methyl-5-(N-beta-hydroxyethylamino)phenol 2-Methyl-5-hydroxyethylaminophenol 5-((2-Hydroxyethyl)amino)-2-methylphenol 5-((2-Hydroxyethyl)amino)-o-cresol 6-Methyl-3-beta-hydroxyethylaminophenol CCRIS 3162 EINECS…	55302-96-0
OC(=O)CCCCC1SCC2NC(=O)NC21	5-(2-oxo-1,3,3a,4,6,6a-hexahydrothieno[3,4-d]imidazol-6-yl)pentanoic acid	5-(2-oxo-1,3,3a,4,6,6a-hexahydrothieno[3,4-d]imidazol-6-yl)pentanoic acid 5-(2-keto-1,3,3a,4,6,6a-hexahydrothieno[3,4-d]imidazol-6-yl)valeric acid 15720-24-8 22879-79-4 3672-05-7 58073-87-3 58-85-5 Medebiotin DivK1c_000311 SPECTRUM1503009 MLS000736711 SPBio_001559 IDI1_000311 5-(2-oxohexahydro-1H-thieno[3,4-d]imidazol-4-yl)pentanoic acid BSPBio_002329 KBio3_001549 SDCCGMLS-0066741.P001 KBio2_0007…
[H]/N=C(\N)/NCCCC(NC(=O)CCCCCCCCCCC)C(O)=O		5-(diaminomethylideneamino)-2-(dodecanoylamino)pentanoic acid 2-(dodecanoylamino)-5-guanidino-pentanoic acid 5-guanidino-2-(1-oxododecylamino)pentanoic acid 5-guanidino-2-(lauroylamino)valeric acid
CC(C)C1OCOCC1(C)C		5,5-dimethyl-4-propan-2-yl-1,3-dioxane 4-Isopropyl-5,5-dimethyl-1,3-dioxane 3583-00-4 NSC48577 m-Dioxane, 4-isopropyl-5,5-dimethyl- AI3-32376 EINECS 222-709-6 NSC 48577 1,3-Dioxane, 5,5-dimethyl-4-(1-methylethyl)-	3583-00-4
CC(CCC=C(C)C)CC(O)CC	5,9-dimethyldec-8-en-3-ol	5,9-dimethyldec-8-en-3-ol 19550-54-0 8-Decen-3-ol, 5,9-dimethyl- AI3-35820 EINECS 243-155-1 3,7-Dimethyl-6-nonen-1-ol 5,9-Dimethyl-8-decen-3-ol	19550-54-0
CCC=CCCC1(C)CCC(=O)O1	5-[(E)-hex-3-enyl]-5-methyloxolan-2-one	5-[(E)-hex-3-enyl]-5-methyloxolan-2-one 5-[(E)-hex-3-enyl]-5-methyl-tetrahydrofuran-2-one 5-[(E)-hex-3-enyl]-5-methyl-2-tetrahydrofuranone 5-[(E)-hex-3-enyl]-5-methyl-oxolan-2-one 70851-61-5 14252-84-7 4-Hydroxy-4-methyl-7-cis-decenoic acid lactone 4-Methyl-4-hydroxy-cis-7-decenoic acid lactone 4-Methyl-cis-decene gamma-lactone EINECS 274-942-8 Lactone of cis-jasmone 2(3H)-Furanone, 5-(3-hexenyl)…	70851-61-5 14252-84-7
COc1ccc(cc1)N1C(=O)c2ccc3c4c2c(ccc4c2ccc4c5c2c3ccc5C(=O)N(c2ccc(cc2)OC)C4=O)C1=O		52276-77-4 55777-33-8 60083-91-2 6424-77-7 2,9-Bis(p-anisyl)anthra(2,1,9-def:6,5,10-d'e'f')diisoquinoline-1,3,8,10(2H,9H)-tetrone Anthra(2,1,9-def:6,5,10-d'e'f')diisoquinoline-1,3,8,10(2H,9H)-tetrone, 2,9-bis(4-methoxyphenyl)- EINECS 229-187-9
CN1CCc2cc(OC)c(OC)c3c2C1Cc1cc(OC)c(cc1-3)OC		5630-11-5 EINECS 207-501-5 NSC 34396 (1)-5,6,6a,7-Tetrahydro-1,2,9,10-tetramethoxy-6-methyl-4H-dibenzo(de,g)quinoline 5,6,6a,7-Tetrahydro-1,2,9,10-tetramethoxy-6-methyl-4H-dibenzo(de,g)quinoline EINECS 227-068-6 Oprea1_787880 1,2,9,10-Tetramethoxy-6-methyl-5,6,6a,7-tetrahydro-4H-dibenzo[de,g]quinoline BAS 00674105 Oprea1_671613 ChemDiv1_020764 MLS000111916 SMR000107835 (S)-5,6,6a,7-Tetrahydro-1,2…	5630-11-5
O=C1c2c3Nc4c(Nc3c(Cl)cc2C(=O)c2ccccc12)c1c(cc4Cl)C(=O)c2ccccc2C1=O		57284-96-5 39456-82-1 130-20-1 61356-48-7 4-24-00-02195 (Beilstein Handbook Reference) 5,9,14,18-Anthrazinetetrone, 7,16-dichloro-6,15-dihydro-, 7,16-Dichloro-6,15-dihydro-5,9,14,18-anthrazinetetrone 7,16-Dichloro-6,15-dihydroanthrazine-5,9,14,18-tetrone BRN 0068486 CI 69825 CI Vat Blue 6 Carbantarene Blue BCF EINECS 204-980-2 HSDB 2933 Harmone B 79 Indo Blue WD 279 Indotoner Blue B 79 Intravat B…	57284-96-5 39456-82-1 130-20-1 61356-48-7
[H]/N=C(\N)/NCCCC(NC(=O)CCCCCCCCCCCCCCC)C(O)=O		58725-47-6 EINECS 261-410-5 N2-(1-Oxohexadecyl)-L-arginine	58725-47-6
O=N(=O)C1(Br)COCOC1	5-Bromo-5-nitro-1,3-dioxane	5-Bromo-5-nitro-1,3-dioxane 30007-47-7 1,3-Dioxane, 5-bromo-5-nitro- 5-Brom-5-nitro-1,3-dioxan [German] 5-Bromo-5-nitro-m-dioxane BRN 4668673 Bronidox EINECS 250-001-7 m-DIOXANE, 5-BROMO-5-NITRO- ZINC02011293 B8791_SIGMA	30007-47-7
CN1SC(Cl)=CC1=O	5-chloro-2-methyl-1,2-thiazol-3-one	5-chloro-2-methyl-1,2-thiazol-3-one 5-chloro-2-methyl-isothiazol-3-one 5-chloro-2-methyl-3-isothiazolone 137662-59-0 5-Chloro-2-methyl-2H-isothiazol-3-one 5-Chloro-2-methyl-4-isothiazolin-3-one BRN 1210149 EINECS 247-500-7 Kathon CG 5243 Methylchloroisothiazolinone 5-Chloro-2-methyl-3(2H)-isothiazolone 00344_FLUKA 5-Chloro-2-methyl-4-isothiazolin-3-one solution 3(2H)-Isothiazolone, 5-chloro-2-met…
CCOCCCC(=C)C(O)=O		5-ethoxy-2-methylidenepentanoic acid 5-ethoxy-2-methylene-pentanoic acid 5-ethoxy-2-methylenepentanoic acid 2-(3-ethoxypropyl)acrylic acid 5-ethoxy-2-methylidene-pentanoic acid
CC1=CC(=O)N(N1)c1ccccc1	5-methyl-2-phenyl-1H-pyrazol-3-one	5-methyl-2-phenyl-1H-pyrazol-3-one 942-32-5 19735-89-8 1H-Pyrazol-5-ol, 3-methyl-1-phenyl- 3-Methyl-1-phenyl-1H-pyrazol-5-ol EINECS 213-390-4 ZINC00281091 1,2-Dihydro-5-methyl-2-phenyl-3H-pyrazol-3-one EINECS 243-261-8 N-Demethylantipyrine 3H-Pyrazol-3-one, 1,2-dihydro-5-methyl-2-phenyl- AIDS-020257 AIDS020257 NCGC00164015-01 STK062417
CC(C)CC=C(C=O)c1ccccc1	5-Methyl-2-phenylhex-2-enal (Z)-5-methyl-2-phenylhex-2-enal	5-Methyl-2-phenylhex-2-enal (Z)-5-methyl-2-phenylhex-2-enal (Z)-5-methyl-2-phenyl-hex-2-enal 5-methyl-2-phenyl-hex-2-enal W319902_ALDRICH
Cc1cccc2C(=O)CCCc21	5-methyl-3,4-dihydro-2H-naphthalen-1-one	5-methyl-3,4-dihydro-2H-naphthalen-1-one 5-methyltetralin-1-one 5-methyl-1-tetralinone 6939-35-1 1(2H)-Naphthalenone, 3,4-dihydro-5-methyl- 5-Methyl-1-tetralone NSC57011 3,4-Dihydro-5-methylnaphthalen-1(2H)-one EINECS 230-073-6 NSC 57011
CCC(=O)CC(C)(C)c1ccccc1	5-Methyl-5-phenylhexan-3-one	5-Methyl-5-phenylhexan-3-one 5-methyl-5-phenyl-hexan-3-one ZINC02294896 STOCK1S-10337 3-Hexanone, 5-methyl-5-phenyl- 5-Phenyl-5-methylhexan-3-one EINECS 225-561-0 IBS-0008197
CC(CC(=O)CC)CC	5-Methylheptan-3-one	5-Methylheptan-3-one 541-85-5 57968-70-4 WLN: 2Y1&1V2 2-Methylbutyl ethyl ketone 3-Heptanone, 5-methyl- 3-Methyl-5-heptanone 4-01-00-03344 (Beilstein Handbook Reference) BRN 0506345 EINECS 208-793-7 Ethyl 2-methylbutyl ketone Ethyl sec-amyl ketone NSC 100734 67260_FLUKA 3-Octanone (natural) 3-Oxooctane 4-01-00-03341 (Beilstein Handbook Reference) 5-METHYL-3-HEPTANONE AI3-36116 BRN 1700021 EINECS …	541-85-5 57968-70-4
CC1CC(O)CN1		5-methylpyrrolidin-3-ol 5-methyl-3-pyrrolidinol
OCCCCCc1ccccc1		5-Phenylpentan-1-ol 10521-91-2 5-Phenylpentanol Benzenepentanol NSC6590 Pentanol, 5-phenyl- Phenylamyl alcohol Phenylpentanol ZINC01693667 W361801_ALDRICH 188220_ALDRICH ST5408124 1-Pentanol, 5-phenyl- (8CI) AI3-11231 EINECS 234-064-8 FEMA No. 3618 NSC 6590 Phenylpentanol (VAN) 1-Pentanol, 5-phenyl- 5-Phenyl-1-pentanol
CC(C)=CCC(C)(C)C(OC)OC	6,6-Dimethoxy-2,5,5-trimethylhex-2-ene	6,6-Dimethoxy-2,5,5-trimethylhex-2-ene 6,6-dimethoxy-2,5,5-trimethyl-hex-2-ene 67674-46-8 1,1-Dimethoxy-2,2,5-trimethylhex-4-ene 2-Hexene, 6,6-dimethoxy-2,5,5-trimethyl- EINECS 266-885-2	67674-46-8
CCC=CCCC1CCCC(=O)O1		6-[(E)-hex-3-enyl]oxan-2-one 6-[(E)-hex-3-enyl]tetrahydropyran-2-one 6-[(E)-hex-3-enyl]-2-tetrahydropyranone 68959-28-4 (Z)-6-(3-Hexenyl)tetrahydro-2H-pyran-2-one 2H-Pyran-2-one, 6-(3-hexenyl)tetrahydro-, (Z)- 2H-Pyran-2-one, 6-(3Z)-3-hexenyltetrahydro- 5-Hydroxy-8-undecenoic acid delta-lactone 5-Hydroxy-cis-8-undecenoic acid lactone 6-(3-Hexenyl)tetrahydro-2H-pyran-2-one, (Z)- EINECS 273-411-8 F…
CCC=CCC1CCCC(=O)O1		6-[(E)-pent-2-enyl]oxan-2-one 6-[(E)-pent-2-enyl]tetrahydropyran-2-one 6-[(E)-pent-2-enyl]-2-tetrahydropyranone 25524-95-2 68170-58-1 34686-71-0 5-Hydroxy-7(Z)-decenoic acid delta-lactone 5-Hydroxy-7(Z)-decenoic acid-delta-lactone 5-Hydroxy-7-decenoic acid delta-lactone EINECS 247-074-2 FEMA No. 3745 Jasmin lactone Jasmine lactone Jasmolactone, delta- Tetrahydro-6-(2-pentenyl)-2H-pyran-2-one, (Z)…
CC=CCCC1CCCC(=O)O1		6-[(E)-pent-3-enyl]oxan-2-one 6-[(E)-pent-3-enyl]tetrahydropyran-2-one 6-[(E)-pent-3-enyl]-2-tetrahydropyranone 32764-98-0 2H-Pyran-2-one, tetrahydro-6-(3-pentenyl)- EINECS 251-201-7 Tetrahydro-6-(3-pentenyl)-2H-pyran-2-one	32764-98-0
CC(=O)NCCCCCC(O)=O	6-Acetamidohexanoic acid	6-Acetamidohexanoic acid DivK1c_000473 NINDS_000473 Spectrum3_000949 IDI1_000473 KBio1_000473 Spectrum5_001172 KBio2_001760 SPBio_000865 T0516-8886 6-Acetamidohexansaeure 6-Acetylaminocaproic acid 6-Acetylaminohexansaeure 6-Acetymidohexanoic acid Acexamic acid [DCF:INN] Acide acexamique [INN-French] Acido acexamico [INN-Spanish] Acidum acexamicum [INN-Latin] EINECS 200-310-8 Hexanoic acid, 6-(ace…
NC(CCCCN)C(=O)NC(CCCCN)C(=O)NC(CCCCN)C(O)=O	6-amino-2-[[6-amino-2-(2,6-diaminohexanoylamino)hexanoyl]amino]hexanoic acid	6-amino-2-[[6-amino-2-(2,6-diaminohexanoylamino)hexanoyl]amino]hexanoic acid 6-amino-2-[[6-amino-2-[(2,6-diamino-1-oxohexyl)amino]-1-oxohexyl]amino]hexanoic acid Trilysine L8901_SIGMA Lys-Lys-Lys
CC(CCO)CC=C(CC)CC	6-Ethyl-3-methyloct-5-en-1-ol	6-Ethyl-3-methyloct-5-en-1-ol 6-ethyl-3-methyl-oct-5-en-1-ol 26330-64-3 3-Methyl-6-ethyl-5-octen-1-ol 5-Octen-1-ol, 6-ethyl-3-methyl- EINECS 247-615-2
CC(C)=CCCC(C)(O)C1CO1	6-methyl-2-(oxiran-2-yl)hept-5-en-2-ol	6-methyl-2-(oxiran-2-yl)hept-5-en-2-ol 6-methyl-2-(2-oxiranyl)hept-5-en-2-ol 11063-76-6 1365-19-1 EINECS 215-723-9 FEMA No. 3746 Linalool, epoxydihydro- Linalool, oxide .alpha.-Methyl-.alpha.-[4-methyl-3-pentenyl]oxiranemethanol	11063-76-6 1365-19-1
CC1=CC(=O)NS(=O)(=O)O1		6-methyl-2,2-dioxooxathiazin-4-one 6-methyl-2,2-dioxo-oxathiazin-4-one 6-methyl-2,2-dioxo-4-oxathiazinone 2,2-diketo-6-methyl-oxathiazin-4-one 6-methyl-2,2-dioxo-1,2,3-oxathiazin-4-one 1,2,3-Oxathiazin-4(3H)-one, 6-methyl-, 2,2-dioxide 3,4-Dihydro-6-methyl-1,2,3-oxathiazin-4-one-2,2-dioxide 6-Methyl-1,2,3-oxathiazin-4(3H)-on 2,2-dioxid 6-Methyl-1,2,3-oxathiazin-4(3H)-one 2,2-dioxide 6-Methyl-3,4-…
Cc1cc2CCCC(=O)c2cc1	6-methyl-3,4-dihydro-2H-naphthalen-1-one	6-methyl-3,4-dihydro-2H-naphthalen-1-one 6-methyltetralin-1-one 6-methyl-1-tetralinone 51015-29-3 ST5444736 3,4-Dihydro-6-methylnaphthalen-1(2H)-one EINECS 256-913-1 1(2H)-Naphthalenone, 3,4-dihydro-6-methyl-
CC(O)CCC=C(C)C	6-Methylhept-5-en-2-ol	6-Methylhept-5-en-2-ol 1569-60-4 4630-06-2 195871_ALDRICH CHEBI:15833 SBB008067 FR-0834 dl-6-Methyl-5-hepten-2-ol 2-Methyl-2-hepten-6-ol 6-Hydroxy-2-methyl-2-heptene AI3-25074 EINECS 216-377-1 NSC 66273 5-Hepten-2-ol, 6-methyl- NSC66273 6-Methyl-5-hepten-2-ol C07288 Sulcatol W511404_ALDRICH
Cc1cc2c(cc1C)N=C1C(=NC(=O)NC1=O)N2CC(O)C(O)C(O)CO		7,8-dimethyl-10-(2,3,4,5-tetrahydroxypentyl)benzo[g]pteridine-2,4-dione 7,8-dimethyl-10-(2,3,4,5-tetrahydroxypentyl)benzo[g]pteridine-2,4-quinone 83-88-5 13123-37-0 Maybridge1_006336 SR-01000640951-1 Lyxoflavine SPBio_002847 RIBOFLAVIN vitamin B2 Oprea1_416960 R4886_SIGMA Riboflavin-[3H(G)] NCGC00095174-01 NCGC00095174-02 A2194/0092321 ARONIS014453 Oprea1_626642 NCGC00095174-05 Prestwick0_000634 …	83-88-5 13123-37-0
OC1NC(=O)N=C2NC(=O)NC2=1	7,9-dihydro-3H-purine-2,6,8-trione	7,9-dihydro-3H-purine-2,6,8-trione uric acid 13154-20-6 33278-42-1 34318-07-5 42911-25-1 42911-27-3 42911-28-4 530-13-2 69-93-2 URC U2625_SIGMA 1H-Purine-2,6,8(3H)-trione, 7,9-dihydro- 1H-Purine-2,6,8-triol 2,6,8-Trioxopurine Lithic acid NSC3975 Purine-2,6,8(1H,3H,9H)-trione 8-hydroxyxanthine InChI=1/C5H4N4O3/c10-3-1-2(7-4(11)6-1)8-5(12)9-3/h(H4,6,7,8,9,10,11,12 CHEBI:17775 CHEBI:46817 2,6,8-trih…	13154-20-6 33278-42-1 34318-07-5 42911-25-1 42911-27-3 42911-28-4 530-13-2 69-93-2
CC(CCCC(C)(C)OC)C(C)O		7-Methoxy-3,7-dimethyloctan-2-ol 7-methoxy-3,7-dimethyl-octan-2-ol 41890-92-0 88401-58-5 2-Octanol, 3,7-dimethyl-7-methoxy- 2-Octanol, 7-methoxy-3,7-dimethyl- 3,7-Dimethyl-7-methoxy-2-octanol BRN 1921024 Dihydromethoxyelgenol EINECS 255-574-7 Elesant Methoxyelgenol Osirol	41890-92-0 88401-58-5
COC(C)(C)CCCC(C)CC=O		7-Methoxy-3,7-dimethyloctanal 7-methoxy-3,7-dimethyl-octanal 7-methoxy-3,7-dimethyl-caprylaldehyde 3613-30-7 53023-57-7 1-OCTANAL, 3,7-DIMETHYL-7-METHOXY- 3,7-Dimethyl-7-methoxy-1-octanal 7-Methoxycitronellal AI3-36183 BRN 1904467 EINECS 222-784-5 Hydroxycitronellal methyl ether Methoxycitronellal Methoxydihydrocitronellal Octanal, 7-methoxy-3,7-dimethyl-	3613-30-7 53023-57-7
Cc1ccc2CCCC(=O)c2c1	7-methyl-3,4-dihydro-2H-naphthalen-1-one	7-methyl-3,4-dihydro-2H-naphthalen-1-one 7-methyltetralin-1-one 7-methyl-1-tetralinone 22009-37-6 7-Methyl-alpha-tetralone EINECS 244-717-9 1(2H)-Naphthalenone, 3,4-dihydro-7-methyl- 7-Methyl-.alpha.-tetralone 7-Methyl-1-tetralone 7-Methyltetralone NSC115847 NSC 115847 ST5444121 3,4-Dihydro-7-methylnaphthalen-1(2H)-one	22009-37-6
CC(C)=CCCC(=C)CC=O	7-methyl-3-methylideneoct-6-enal	7-methyl-3-methylideneoct-6-enal 7-methyl-3-methylene-oct-6-enal 7-Methyl-3-methyleneoct-6-enal 7-methyl-3-methylidene-oct-6-enal 55050-40-3 6-Octenal, 7-methyl-3-methylene- EINECS 259-457-1	55050-40-3
CC(C)=CCCC(=C)C=C	7-methyl-3-methylideneocta-1,6-diene	7-methyl-3-methylideneocta-1,6-diene 7-methyl-3-methylene-octa-1,6-diene 7-Methyl-3-methyleneocta-1,6-diene 7-methyl-3-methylidene-octa-1,6-diene 123-35-3 2153-31-3 1,6-Octadiene, 7-methyl-3-methylene- 2-Methyl-6-methylene-2,7-octadiene 3-Methylene-7-methyl-1,6-octadiene 4-01-00-01108 (Beilstein Handbook Reference) 7-Methyl-3-methylene-1,6-octadiene AI3-00738 BRN 1719990 CCRIS 3725 EINECS 204-622…	123-35-3 2153-31-3
COC(C)OCCC(C)CCC=C(C)C	8-(1-Methoxyethoxy)-2,6-dimethyloct-2-ene	8-(1-Methoxyethoxy)-2,6-dimethyloct-2-ene 8-(1-methoxyethoxy)-2,6-dimethyl-oct-2-ene 1-(3,7-dimethyloct-6-enoxy)ethoxymethane 68039-24-7 Acetaldehyde citronellylmethyl acetal Acetaldehyde, 3,7-dimethyl-6-octenylmethyl acetal EINECS 268-243-7 2-Octene, 8-(1-methoxyethoxy)-2,6-dimethyl-	68039-24-7
CC(CCCC(C)(C)O)CC([n]1ccc2ccccc12)[n]1ccc2ccccc12		8,8-di(indol-1-yl)-2,6-dimethyloctan-2-ol 8,8-di(indol-1-yl)-2,6-dimethyl-octan-2-ol 8,8-bis(1-indolyl)-2,6-dimethyloctan-2-ol 67801-36-9 1H-Indole-1-heptanol, eta-1H-indol-1-yl-alpha,alpha, epsilon-trimethyl- 1H-Indole-1-heptanol, eta-1H-indol-1-yl-alpha,alpha,epsilon-trimethyl- 8,8-Bis(1H-indol-1-yl)-2,6-dimethyl-2-octanol EINECS 267-156-1 Hydroxycitronellal - indol (Schiff Base) Indol-hydroxyc…	67801-36-9
CC(CCC=C(C)C)CC(OC)OC	8,8-Dimethoxy-2,6-dimethyloct-2-ene	8,8-Dimethoxy-2,6-dimethyloct-2-ene 8,8-dimethoxy-2,6-dimethyl-oct-2-ene 133005-50-2 923-69-3 EINECS 213-098-7 2-Octene, 8,8-dimethoxy-2,6-dimethyl-	133005-50-2 923-69-3
CC(C)CCCCCCCOC(=O)CC(C)CC(C)(C)C	8-methylnonyl 3,5,5-trimethylhexanoate	8-methylnonyl 3,5,5-trimethylhexanoate 3,5,5-trimethylhexanoic acid 8-methylnonyl ester 59231-35-5 EINECS 261-674-1 Hexanoic acid, 3,5,5-trimethyl-, isodecyl ester Isodecyl 3,5,5-trimethylhexanoate Isodecyl isononanoate Isomeric trimethyl-1-heptyl 3,5,5-trimethylhexanoate	59231-35-5
CCC1OCC2(CC=CCC2)CO1	9-ethyl-8,10-dioxaspiro[5.5]undec-3-ene	9-ethyl-8,10-dioxaspiro[5.5]undec-3-ene 64165-57-7 EINECS 264-716-7 2,4-Dioxaspiro(5.5)undec-8-ene, 3-ethyl- 3-Ethyl-2,4-dioxaspiro(5.5)undec-8-ene	64165-57-7
C1c2ccccc2Sc2ccccc21	9H-thioxanthene	9H-thioxanthene 261-31-4 InChI=1/C13H10S/c1-3-7-12-10(5-1)9-11-6-2-4-8-13(11)14-12/h1-8H,9H 10H-Dibenzo(b,e)thiin EINECS 205-972-1 Thioxanthene	261-31-4
C1CN1		Aziridine Ethylenimine 81210-08-4 81210-09-5 99932-76-0 9077-52-5 92047-44-4 96956-22-8 96956-23-9 151-56-4 68130-98-3 96956-24-0 9002-98-6 68130-99-4 145379-92-6 39289-19-5 66456-64-2 69522-69-6 81210-07-3 1H-Azirine, dihydro- 5-20-01-00003 (Beilstein Handbook Reference) AI3-50324 Aethylenimin [German] Azacyclopropane Aziran Aziridin [German] BRN 0102380 CCRIS 296 Dihydro-1H-azirine Dihydroazire…	81210-08-4 81210-09-5 99932-76-0 9077-52-5 92047-44-4 96956-22-8 96956-23-9 151-56-4 68130-98-3 96956-24-0 9002-98-6 68130-99-4 145379-92-6 39289-19-5 66456-64-2 69522-69-6 81210-07-3
C[N+]12CN3CN(C1)CN(C2)C3		BAS 00170309 1-Methyl-3,5,7-triaza-1-azoniatricyclo(3.3.1.13,7)decane iodide EINECS 256-890-8
O=Cc1ccccc1	BENZALDEHYDE	BENZALDEHYDE 100-52-7 Artificial Almond Oil Benzadehyde Benzaldehyde FFC Benzenecarbonal Benzenecarboxaldehyde NCI-C56133 NSC7917 Oil of Bitter Almond Phenylmethanal WLN: VHR Benzaldehyde (NF) D02314 NCGC00091819-01 benzanoaldehyde 09143_FLUKA AI3-09931 Artificial essential oil of almond Benzaldehyde (natural) Benzaldehyde [UN1990] [Class 9] Benzaldehyde [USAN] Benzene carbaldehyde Benzene carbox…	100-52-7
c1ccccc1		BENZENE 27271-55-2 68956-52-5 26181-88-4 174973-66-1 54682-86-9 71-43-2 NCGC00090744-02 UN1114 Benzen [Polish] Benzene + aniline combo 270709_ALDRICH 311855_SIGMA Benzene (including benzene from gasoline) 676985_ALDRICH Benzene [UN1114] [Flammable liquid] 154628_SIAL Benzene, labeled with carbon-14 and tritium benzol benzole 322644_SIGMA Benzin (Obs.) InChI=1/C6H6/c1-2-4-6-5-3-1/h1-6 12540_FLUKA …	27271-55-2 68956-52-5 26181-88-4 174973-66-1 54682-86-9 71-43-2
N#Cc1ccccc1	Benzonitrile	Benzonitrile 100-47-0 UN2224 ZINC00899417 AIDS-045566 C6H5-CN CHEBI:27991 Benzonitrile [UN2224] [Poison] ST5214521 NCGC00091747-01 c0367 Benzoic acid nitrile AIDS045566 B8959_ALDRICH 270318_ALDRICH 294098_ALDRICH CCRIS 3184 AI3-24184 Benzenecarbonitrile Benzene, cyano- Benzenenitrile EINECS 202-855-7 NSC8039 WLN: NCR NSC 8039 Phenylcyanide Fenylkyanid [Czech] C09814 Cyanobenzene Phenyl cyanide HS…
O=C(Cl)c1ccccc1	BENZOYL CHLORIDE	BENZOYL CHLORIDE 98-88-4 12930_FLUKA InChI=1/C7H5ClO/c8-7(9)6-4-2-1-3-5-6/h1-5 240540_SIAL B12695_SIAL 320153_ALDRICH 259950_SIAL Benzaldehyde, .alpha.-chloro- BENZOIC ACID,CHLORIDE 4-09-00-00721 (Beilstein Handbook Reference) BRN 0471389 Benzaldehyde, alpha-chloro- Benzenecarbonyl chloride Benzoic acid, chloride Benzoyl chloride [UN1736] [Corrosive] CCRIS 802 EINECS 202-710-8 HSDB 383 UN1736 alp…
CC(C)COC(=O)CCCCC(=O)OCC(C)C	Bis(2-methylpropyl) hexanedioate	Bis(2-methylpropyl) hexanedioate Diisobutyl hexanedioate hexanedioic acid diisobutyl ester adipic acid diisobutyl ester 141-04-8 53659-85-1 68954-45-0 EINECS 273-244-0 Hexanedioic acid, di-C4-13-branched alkyl esters C14260 450588_ALDRICH Hexanedioic acid, diisobutyl ester NSC 6343 Plasthall DIBA 4-02-00-01962 (Beilstein Handbook Reference) AI3-00995 BRN 1791084 EINECS 205-450-3 HSDB 345 Adipic a…	141-04-8 53659-85-1 68954-45-0
CC(C)COC(=O)CCCC(=O)OCC(C)C	bis(2-methylpropyl) pentanedioate	bis(2-methylpropyl) pentanedioate diisobutyl pentanedioate pentanedioic acid diisobutyl ester glutaric acid diisobutyl ester 71195-64-7 Glutaric acid, diisobutyl ester Pentanedioic acid bis(2-methylpropyl) ester, diisobutyl glutarate Pentanedioic acid, bis(2-methylpropyl) ester Diisobutyl glutarate EINECS 275-257-7	71195-64-7
CCC=C		But-1-ene 61788-35-0 106-98-9 1735-75-7 33004-02-3 54366-07-3 172345-47-0 25038-50-0 9003-28-5 25167-67-3 Poly(1-butene), isotactic Actipol E6 .alpha.-Butene 1-BUTENE 1-Butylene Butene, 1- CCRIS 8970 EINECS 203-449-2 Ethylethylene HSDB 179 alpha-Butene alpha-Butylene BUTENE Butylene Butylene [UN1012] [Flammable gas] EINECS 246-689-3 HSDB 5127 UN1012 n-Butene n-Butylene 19061_FLUKA 189391_ALDRICH …	61788-35-0 106-98-9 1735-75-7 33004-02-3 54366-07-3 172345-47-0 25038-50-0 9003-28-5 25167-67-3
C=CCC(O)=O		But-3-enoic acid 625-38-7 LMFA01030004 134716_ALDRICH AI3-32117 EINECS 210-892-5 NSC 44546 beta-Butenoic acid 94990_FLUKA ethenylacetic acid .beta.-Butenoic acid 3-Butenoic acid Acetic acid, ethenyl- NSC44546 Vinylacetic acid AIDS017598 Vinyl acetic acid CHEBI:35897 AIDS-017598	625-38-7
CCC(C)=O	butan-2-one	butan-2-one 78-93-3 135311-02-3 NCGC00090973-01 33407_RIEDEL Oxobutane c0020 InChI=1/C4H8O/c1-3-4(2)5/h3H2,1-2H 40311_SUPELCO 230294_ALDRICH ghl.PD_Mitscher_leg0.417 2-Butanone C02845 Ethyl methyl ketone MEK Methyl ethyl ketone 04380_FLUKA 48877_SUPELCO W217018_ALDRICH 110264_SIAL ZINC00901514 676926_SIAL 02469_FLUKA 3-Butanone AI3-07540 AI3-07540 (USDA) Acetone, methyl- Aethylmethylketon [German…	78-93-3 135311-02-3
CC(=C)C(=O)OC(C)CC	butan-2-yl 2-methylprop-2-enoate	butan-2-yl 2-methylprop-2-enoate sec-butyl 2-methylprop-2-enoate 2-methylprop-2-enoic acid sec-butyl ester 2-methylacrylic acid sec-butyl ester 2998-18-7 2-Propenoic acid, 2-methyl-, 1-methylpropyl ester Methacrylic acid, sec-butyl ester NSC32630 sec-Butyl methacrylate EINECS 221-073-7	2998-18-7
CCCC=O		BUTANAL butyraldehyde 123-72-8 NCGC00091658-01 4-01-00-03229 (Beilstein Handbook Reference) AI3-24198 Aldehyde butyrique [French] Aldeide butirrica [Italian] BRN 0506061 Butylaldehyde Butyraldehyd [German] Butyraldehyde (crude) Butyraldehyde [UN1129] [Flammable liquid] CCRIS 3221 EINECS 204-646-6 FEMA Number 2219 HSDB 2798 NSC 62779 UN1129 ZINC01529195 W221902_ALDRICH W221910_ALDRICH BUTANAL N-BU…	123-72-8
CCCCOC(=O)c1ccccc1N	Butyl 2-aminobenzoate	Butyl 2-aminobenzoate 2-Aminobenzoic acid butyl ester 7756-96-9 ZINC01599253 NCGC00091623-01 2-Aminobenzoic acid, butyl ester NSC406509 AI3-03442 Anthranilic acid, butyl ester Anthranilic acid, butyl ester (6CI,7CI,8CI) BUTYL ANTHRANILATE Benzoic acid, 2-amino-, butyl ester Butyl O-aminobenzoate CCRIS 4759 EINECS 231-816-7 FEMA No. 2181 NSC 406509 n-Butyl anthranilate n-Butyl o-aminobenzoate W218…
CC(CCC)C(=O)OCCCC	butyl 2-methylpentanoate	butyl 2-methylpentanoate 2-methylpentanoic acid butyl ester 2-methylvaleric acid butyl ester 6297-41-2 Butyl 2-methylvalerate NSC17885 Valeric acid, 2-methyl-, butyl ester EINECS 228-569-2 NSC 17885 Pentanoic acid, 2-methyl-, butyl ester Valeric acid, 2-methyl-, butyl ester (8CI)
CCCCOC(=O)CS	butyl 2-sulfanylacetate	butyl 2-sulfanylacetate 2-mercaptoacetic acid butyl ester butyl 2-sulfanylethanoate 10047-28-6 ST5409775 EINECS 233-156-5 NSC 65453 Acetic acid, mercapto-, butyl ester Butyl 2-mercaptoacetate Butyl mercaptoacetate Butyl thioglycolate NSC65453 ZINC04501341 AI3-63085
CCCCOC(C)=O		Butyl acetate acetic acid butyl ester Butyl ethanoate 123-86-4 LS-684 InChI=1/C6H12O2/c1-3-4-5-8-6(2)7/h3-5H2,1-2H 33201_RIEDEL NCGC00091573-01 4-02-00-00143 (Beilstein Handbook Reference) AI3-00406 Acetate de butyle [French] Acetic acid n-butyl ester BRN 1741921 Butile (acetati di) [Italian] Butyl acetate, n- Butylacetat [German] Butylacetaten [Dutch] Butyle (acetate de) [French] Butylester kyse…	123-86-4
CCCCOC=O		Butyl formate formic acid butyl ester Butyl methanoate 592-84-7 4-02-00-00028 (Beilstein Handbook Reference) 261521_ALDRICH Butylester kyseliny mravenci [Czech] AI3-25265 BRN 1742108 Formic acid, butyl ester NSC6969 WLN: VHO4 n-Butyl formate n-Butyl methanoate FEMA No. 2196 NSC 6969 UN1128 n-Butyl formate [UN1128] [Flammable liquid] EINECS 209-772-5 InChI=1/C5H10O2/c1-2-3-4-7-5-6/h5H,2-4H2,1H W21…
CCCCOC(=O)C=C	butyl prop-2-enoate	butyl prop-2-enoate prop-2-enoic acid butyl ester Acrylic acid butyl ester 126492-54-4 220713-31-5 141-32-2 112790-39-3 164251-78-9 56257-66-0 62362-39-4 71343-67-4 81989-46-0 86090-89-3 9003-49-0 234923_ALDRICH NCGC00091107-01 01770_FLUKA 4-02-00-01463 (Beilstein Handbook Reference) AI3-15739 Acrylic acid butyl ester (8CI) Acrylic acid n-butyl ester BRN 1749970 Butyl acrylates, inhibited [UN2348…	126492-54-4 220713-31-5 141-32-2 112790-39-3 164251-78-9 56257-66-0 62362-39-4 71343-67-4 81989-46-0 86090-89-3 9003-49-0
CCCCOC(=O)CC	Butyl propanoate	Butyl propanoate propanoic acid butyl ester propionic acid butyl ester 590-01-2 307378_ALDRICH Butyl propionate NSC8449 Propanoic acid, butyl ester Propionic acid, butyl ester n-Butyl propanoate n-Butyl propionate 4-02-00-00708 (Beilstein Handbook Reference) AI3-24352 BRN 1700932 Butyl propionate (natural) Butyl propionate [UN1914] [Flammable liquid] EINECS 209-669-5 FEMA No. 2211 NSC 8449 UN1914…	590-01-2
CCCCOC(=O)CCCCCCCCC=C	Butyl undec-10-enoate	Butyl undec-10-enoate undec-10-enoic acid butyl ester 109-42-2 W221600_ALDRICH EINECS 203-670-4 AI3-05920 BRN 1776569 10-Undecenoic acid, butyl ester Butyl 10-undecenoate Butyl 10-undecylenate NSC2395 NSC 2395 FEMA No. 2216
O=C=O		carbon dioxide 18923-20-1 124-38-9 12181-60-1 122427-25-2 34496-91-8 39310-68-4 85540-96-1 AER Fixus After-damp Anhydride carbonique [French] Carbon Dioxide [USAN] Carbon dioxide [UN1013] [Nonflammable gas] Carbon dioxide, refrigerated liquid [UN2187] [Nonflammable gas] Carbon dioxide, solid or dry ice [UN1845] [Class 9] Carbon oxide, di- Carbonic acid anhydride Carbonica Caswell No. 163 Dioxido …	18923-20-1 124-38-9 12181-60-1 122427-25-2 34496-91-8 39310-68-4 85540-96-1
FC(F)Cl	chloro-difluoromethane	chloro-difluoromethane chloro-difluoro-methane 73666-77-0 75-45-6 134191-96-1 191542-01-5 Difluoromonochloromethane Dymel 22 EINECS 200-871-9 Electro-CF 22 Eskimon 22 F 22 F 22 (halocarbon) FC 22 FKW 22 Flugene 22 Fluorocarbon 22 Fluorocarbon-22 Forane 22 Forane 22 B Freon 22 Frigen Frigen 22 Genetron 22 HCFC 22 HCFC-22 HFA-22 HSDB 143 Haltron 22 Hydrochlorofluorocarbon 22 Isceon 22 Isotron 22 Kh…	73666-77-0 75-45-6 134191-96-1 191542-01-5
C=CCl		Chloroethene Chloroethylene 75-01-4 9002-86-2 Poly(vinyl chloride) 81387_FLUKA Vinyl chloride 387622_ALDRICH 81424_FLUKA 189553_ALDRICH 81388_FLUKA 346764_ALDRICH 81395_FLUKA 81428_FLUKA InChI=1/C2H3Cl/c1-2-3/h2H,1H 346772_ALDRICH 81392_FLUKA 81429_FLUKA PVC 81427_FLUKA 389293_ALDRICH c0358 81425_FLUKA 389323_ALDRICH Polyvinylchloride latex 81423_FLUKA 81431_FLUKA 4-01-00-00700 (Beilstein Handboo…	75-01-4 9002-86-2
O=C(Cc1ccccc1)OC1CCCCC1	cyclohexyl 2-phenylacetate	cyclohexyl 2-phenylacetate 2-phenylacetic acid cyclohexyl ester cyclohexyl 2-phenylethanoate 42288-75-5 AI3-11578 EINECS 255-751-9 NSC 406961 NSC406961 ZINC00396110 Benzeneacetic acid, cyclohexyl ester Cyclohexyl phenylacetate NSC67365	42288-75-5
C=CCCCCCCCC=O	dec-9-enal	dec-9-enal 39770-05-3 EINECS 254-624-5 9-Decenal	39770-05-3
CC(=O)OCCCCCCCCC=C		dec-9-enyl acetate acetic acid dec-9-enyl ester dec-9-enyl ethanoate 50816-18-7 Acetic acid 9-decenyl ester 4-02-00-00195 (Beilstein Handbook Reference) 9-Decen-1-ol, acetate 9-Decenyl acetate ACETIC ACID, 9-DECENYL ESTER AI3-34397 BRN 1765355 Decenyl acetate EINECS 256-784-1 9-Decen-1-yl acetate	50816-18-7
C=CCCCCCCC=C		deca-1,9-diene 1647-16-1 143000-98-0 118303_ALDRICH NSC102789 347841_ALDRICH decadiene-1,9 1,9-DECADIENE EINECS 216-711-6 NSC 102789 NCGC00090980-01 SBB008889 30469_FLUKA
OC(c1ccccc1)c1ccccc1	di(phenyl)methanol	di(phenyl)methanol 91-01-0 564192_ALDRICH Benzhydrol, polymer-bound Diphenylmethanol resin 42880_FLUKA ST5406336 AIDS-017542 InChI=1/C13H12O/c14-13(11-7-3-1-4-8-11)12-9-5-2-6-10-12/h1-10,13-14 Benzenemethanol, .alpha.-phenyl- Benzhydrol Benzhydryl alcohol Benzohydrol Diphenylcarbinol Diphenylmethanol Diphenylmethyl alcohol Hydroxydiphenylmethane NSC32150 B4856_ALDRICH 4-06-00-04648 (Beilstein Han…	91-01-0
O=C(c1ccccc1)c1ccccc1	di(phenyl)methanone	di(phenyl)methanone 119-61-9 CHEBI:41308 B9300_SIAL NCGC00090787-01 ZINC00968233 239852_SIAL UPCMLD-DP071:001 .alpha.-Oxodiphenylmethane .alpha.-Oxoditane Benzene, benzoyl- Benzoylbenzene Diphenylmethanone Ketone, diphenyl Methanone, diphenyl- NSC8077 Phenyl ketone WLN: RVR 427551_ALDRICH Benzophenone C06354 Diphenyl ketone NCGC00090787-03 W213403_ALDRICH NCGC00090787-04 442842_SUPELCO BENZOPHENO…	119-61-9
CC(CC)OC(=O)C(=O)OC(C)CC	dibutan-2-yl oxalate	dibutan-2-yl oxalate disec-butyl oxalate oxalic acid disec-butyl ester dibutan-2-yl ethanedioate 13784-89-9 Oxalic acid, di-sec-butyl ester Ethanedioic acid, bis(1-methylpropyl) ester Di-sec-butyl oxalate EINECS 237-442-0	13784-89-9
CCCCOC(=O)CCCCC(=O)OCCCC	Dibutyl hexanedioate	Dibutyl hexanedioate hexanedioic acid dibutyl ester Adipic acid dibutyl ester 105-99-7 Di-n-butyl adipate Dibutyl adipate Dibutyl adipinate Experimental Tick Repellent 3 Experimental Tick Repellent 3PS Hexanedioic acid, dibutyl ester NSC8086 WLN: 4OV4VO4 ST5214516 C14253 3PS 4-02-00-01961 (Beilstein Handbook Reference) AI3-00671 BRN 1790739 Cetiol B Di-butyl adipate Dibutylester kyseliny adipove …	105-99-7
CCCCOC(=O)C(=O)OCCCC		Dibutyl oxalate oxalic acid dibutyl ester dibutyl ethanedioate 2050-60-4 NSC 8468 InChI=1/C10H18O4/c1-3-5-7-13-9(11)10(12)14-8-6-4-2/h3-8H2,1-2H Oxalic acid, dibutyl ester (8CI) Butyl ethanedioate Butyl oxalate Di-n-butyl oxalate Ethanedioic acid, dibutyl ester NSC8468 Oxalic acid, dibutyl ester ZINC01586759 227137_ALDRICH AI3-06011 DI-N-BUTYLOXALATE EINECS 218-092-8
CCOC(=O)C(N)CC(=O)OCC	diethyl 2-aminobutanedioate	diethyl 2-aminobutanedioate 2-aminobutanedioic acid diethyl ester 2-aminosuccinic acid diethyl ester Aspartic acid, diethyl ester, l-(+)-
CCOC(=O)CCC(N)C(=O)OCC	diethyl 2-aminopentanedioate	diethyl 2-aminopentanedioate 2-aminopentanedioic acid diethyl ester 2-aminoglutaric acid diethyl ester Glutamic acid, diethyl ester, L-
CCOC(=O)CCC(=O)OCC		Diethyl butanedioate butanedioic acid diethyl ester succinic acid diethyl ester 68989-32-2 123-25-1 W237701_ALDRICH ZINC01648294 InChI=1/C8H14O4/c1-3-11-7(9)5-6-8(10)12-4-2/h3-6H2,1-2H 07429_FLUKA (C8-C26) Alkylalcohol succinate diester Butanedioic acid, di-C8-26-alkyl esters 112402_ALDRICH 4-02-00-01914 (Beilstein Handbook Reference) AI3-00682 BRN 0907645 Diethyl ethanedicarboxylate Diethylester…
CCOC(=O)CCCCC(=O)OCC	Diethyl hexanedioate	Diethyl hexanedioate hexanedioic acid diethyl ester adipic acid diethyl ester 68201-71-8 68989-29-7 68989-28-6 141-28-6 (C18-C28) Alcohol ester of adipic acid Hexanedioic acid, C18-28-alkyl esters 4-02-00-01960 (Beilstein Handbook Reference) AI3-00342 BRN 1780035 Diethylester kyseliny adipove [Czech] EINECS 205-477-0 Adipic acid, diethyl ester Diethyl adipate Ethyl .delta.-carboethoxyvalerate Eth…	68201-71-8 68989-29-7 68989-28-6 141-28-6
CCOC(=O)C(=O)OCC	Diethyl oxalate	Diethyl oxalate oxalic acid diethyl ester Diethyl ethanedioate 95-92-1 ZINC01648270 Ethanedioic acid, diethyl ester Ethyl oxalate NSC8851 Oxalic acid, diethyl ester WLN: 2OVVO2 135364_ALDRICH ST5214573 4-02-00-01848 (Beilstein Handbook Reference) BRN 0606350 Diethylester kyseliny stavelove [Czech] EINECS 202-464-1 Ethyl oxalate (VAN) Ethyl oxalate [UN2525] [Poison] HSDB 2131 NSC 8851 Oxalic ether…	95-92-1
CCOC(=O)CC(=O)OCC	Diethyl propanedioate	Diethyl propanedioate propanedioic acid diethyl ester malonic acid diethyl ester 145601-68-9 105-53-3 Ethyl malonate Malonic acid, diethyl ester Malonic ester Methanedicarboxylic acid, diethyl ester NSC8864 Propanedioic acid, diethyl ester WLN: 2OV1VO2 D97754_ALDRICH ST5214386 ZINC01648281 AI3-00656 EINECS 203-305-9 Ethyl malonate (VAN) Ethyl methanedicarboxylate Ethyl propanedioate FEMA No. 2375…	145601-68-9 105-53-3
C[N+](CCOCCCO)(CC)CC	diethyl-[2-(3-hydroxypropoxy)ethyl]-methylazanium	diethyl-[2-(3-hydroxypropoxy)ethyl]-methylazanium diethyl-[2-(3-hydroxypropoxy)ethyl]-methyl-ammonium diethyl-[2-(3-hydroxypropoxy)ethyl]-methylammonium diethyl-[2-(3-hydroxypropoxy)ethyl]-methyl-azanium
COCOC	Dimethoxymethane	Dimethoxymethane 109-87-5 47649_FLUKA InChI=1/C3H8O2/c1-4-3-5-2/h3H2,1-2H 2,4-Dioxapentane AI3-16096 Anesthenyl Bis(methoxy)methane Dimethyl formal EINECS 203-714-2 Formaldehyde dimethyl acetal Formaldehyde dimethylacetal Formaldehyde methyl ketal HSDB 1820 METHYLAL Methane, dimethoxy- Methoxymethyl methyl ether Methylal [UN1234] [Flammable liquid] Methylene dimethyl ether Metylal [Polish] UN1234…	109-87-5
COC(OC)c1ccccc1		Dimethoxymethylbenzene 1125-88-8 W212806_ALDRICH (dimethoxymethyl)benzene BENZALDEHYDE DIMETHYLACETAL InChI=1/C9H12O2/c1-10-9(11-2)8-6-4-3-5-7-8/h3-7,9H,1-2H BRN 2044501 381438_ALDRICH ZINC00389865 226076_ALDRICH 4-07-00-00513 (Beilstein Handbook Reference) AI3-36125 12025_FLUKA Benzaldehyde dimethyl acetal (natural) EINECS 214-413-0 FEMA No. 2128 NSC 286137 Toluene, alpha,alpha-dimethoxy- alpha,…	1125-88-8
COC(=O)C(C)CCC(=O)OC	dimethyl 2-methylpentanedioate	dimethyl 2-methylpentanedioate 2-methylpentanedioic acid dimethyl ester 2-methylglutaric acid dimethyl ester 33514-22-6 Dimethyl (R)-2-methylglutarate EINECS 251-552-6 Glutaric acid, 2-methyl-, dimethyl ester Pentanedioic acid, 2-methyl-, dimethyl ester	33514-22-6
COC(=O)CCC(=O)OC	Dimethyl butanedioate	Dimethyl butanedioate butanedioic acid dimethyl ester succinic acid dimethyl ester 106-65-0 14150_FLUKA ZINC01683870 AI3-02480 CCRIS 4803 Dimethylsuccinate EINECS 203-419-9 FEMA No. 2396 HSDB 5370 Methyl butanedioate NSC 52209 NCGC00091530-01 ST5214542 LS-406 112755_ALDRICH DBE-4 dibasic ester W239607_ALDRICH Butanedioic acid, dimethyl ester Dimethyl succinate Methyl succinate NSC52209 Succinic a…	106-65-0
COC(=O)OC		Dimethyl carbonate carbonic acid dimethyl ester 616-38-6 Carbonic acid, dimethyl ester Methyl carbonate Methyl carbonate ((MeO)2CO) NSC9371 WLN: 1OVO1 D152927_ALDRICH InChI=1/C3H6O3/c1-5-3(4)6-2/h1-2H CHEBI:36596 ZINC01699944 517127_ALDRICH AI3-14705 DIMETHYLCARBONATE Dimethyl carbonate [UN1161] [Flammable liquid] EINECS 210-478-4 HSDB 6928 NSC 9371 UN1161
COC(=O)C(=O)OC		Dimethyl oxalate Oxalic acid dimethyl ester dimethyl ethanedioate 553-90-2 135623_ALDRICH AI3-21214 EINECS 209-053-6 NSC 9374 ST5214504 C10900 Methyl oxalate Ethanedioic acid, dimethyl ester NSC9374 Oxalic acid, dimethyl ester 75752_FLUKA InChI=1/C4H6O4/c1-7-3(5)4(6)8-2/h1-2H ZINC01532047	553-90-2
C[N+](C)(Cc1ccccc1)CCOC(=O)C=C	dimethyl-(phenylmethyl)-(2-prop-2-enoyloxyethyl)azanium	dimethyl-(phenylmethyl)-(2-prop-2-enoyloxyethyl)azanium dimethyl-(phenylmethyl)-(2-prop-2-enoyloxyethyl)ammonium dimethyl-[2-(1-oxoprop-2-enoxy)ethyl]-(phenylmethyl)ammonium 2-acryloyloxyethyl-(benzyl)-dimethyl-ammonium
CC(C)(C)CC(C)(C)c1ccc(cc1)OCCOCC[N+](C)(C)Cc1ccccc1	dimethyl-(phenylmethyl)-[2-[2-[4-(2,4,4-trimethylpentan-2-yl)phenoxy]ethoxy]ethyl]azanium	dimethyl-(phenylmethyl)-[2-[2-[4-(2,4,4-trimethylpentan-2-yl)phenoxy]ethoxy]ethyl]azanium dimethyl-(phenylmethyl)-[2-[2-[4-(1,1,3,3-tetramethylbutyl)phenoxy]ethoxy]ethyl]ammonium benzyl-dimethyl-[2-[2-[4-(1,1,3,3-tetramethylbutyl)phenoxy]ethoxy]ethyl]ammonium Spectrum4_000248 KBioGR_000656 KBio2_005608 AIDS-018927 AIDS018927 Prestwick0_000708 KBio3_001406 BPBio1_000985 Spectrum_000072 NCI60_00169…
CC(C)CCCCCCCCCCCCCCC(=O)NCCC[N+](C)(C)CC1CO1	dimethyl-[3-(16-methylheptadecanoylamino)propyl]-(oxiran-2-ylmethyl)azanium	dimethyl-[3-(16-methylheptadecanoylamino)propyl]-(oxiran-2-ylmethyl)azanium dimethyl-[3-(16-methylheptadecanoylamino)propyl]-(oxiran-2-ylmethyl)ammonium dimethyl-[3-[(16-methyl-1-oxoheptadecyl)amino]propyl]-(2-oxiranylmethyl)ammonium glycidyl-dimethyl-[3-(16-methylheptadecanoylamino)propyl]ammonium
C[Si](C)(O[Si](C)(c1ccccc1)c1ccccc1)O[Si](C)(c1ccccc1)c1ccccc1	dimethyl-bis[(methyl-di(phenyl)silyl)oxy]silane	dimethyl-bis[(methyl-di(phenyl)silyl)oxy]silane 26746-40-7 3982-82-9 445975_ALDRICH Dow Corning silicone diffusion pump fluids 1,1,5,5-Tetraphenyl-1,3,3,5-tetramethyltrisiloxane 1,3,3,5-TETRAMETHYL-1,1,5,5-TETRAPHENYLTRISILO* 1,3,3,5-Tetramethyl-1,1,5,5-tetraphenyltrisiloxane EINECS 223-620-5 Trisiloxane, 1,3,3,5-tetramethyl-1,1,5,5-tetraphenyl-	26746-40-7 3982-82-9
CC(C)OC(=O)C(=O)OC(C)C	dipropan-2-yl oxalate	dipropan-2-yl oxalate Diisopropyl oxalate oxalic acid diisopropyl ester dipropan-2-yl ethanedioate 615-81-6 Ethanedioic acid, bis(1-methylethyl) ester NSC4877 InChI=1/C8H14O4/c1-5(2)11-7(9)8(10)12-6(3)4/h5-6H,1-4H AI3-11244 EINECS 210-448-0	615-81-6
CCCOC(=O)OCCC	Dipropyl carbonate	Dipropyl carbonate carbonic acid dipropyl ester 623-96-1 NSC166495 294934_ALDRICH Carbonic acid, dipropyl ester EINECS 210-822-3 NSC 166495 n-Propyl carbonate	623-96-1
CCCOC(=O)C(=O)OCCC		Dipropyl oxalate oxalic acid dipropyl ester dipropyl ethanedioate 615-98-5 Oxalic acid, dipropyl ester AI3-32501 Di-n-propyl oxalate Ethanedioic acid, dipropyl ester EINECS 210-456-4 NSC4878	615-98-5
C=C	Ethene	Ethene Ethylene 9002-88-4 68037-39-8 33060-30-9 87701-64-2 87701-65-3 74-85-1 81224_FLUKA 269352_ALDRICH 181900_ALDRICH Athylen 434264_ALDRICH POLYETHYLENE Acetene Athylen [German] Bicarburretted hydrogen Caswell No. 436 EINECS 200-815-3 EPA Pesticide Chemical Code 041901 Elayl Ethylene, compressed [UN1962] [Flammable gas] Ethylene, pure Ethylene, refrigerated liquid (cryogenic liquid) [UN1038] […
CC(=O)OC=C	Ethenyl acetate	Ethenyl acetate Vinyl acetate Acetic acid vinyl ester Ethenyl ethanoate 220713-36-0 61891-42-7 82041-23-4 108-05-4 85306-26-9 WLN: 1VO1U1 Zeset T 46060_FLUKA Acetoxyethylene Vinylester kyseliny octove [Czech] 1-Acetoxyethylene Acetate de vinyle [French] Acetic acid, ethylene ether Acetic acid, vinyl ester Acetoxyethene CCRIS 1306 EINECS 203-545-4 CHEBI:46916 Essigsaeurevinylester Vinylazetat HSDB…	220713-36-0 61891-42-7 82041-23-4 108-05-4 85306-26-9
C=Cc1ccccc1	Ethenylbenzene	Ethenylbenzene Vinylbenzene 79637-11-9 68441-35-0 68987-41-7 9003-53-6 100-42-5 12770-88-6 00952_FLUKA Ethylene, phenyl- NCI-C02200 NSC62785 00954_FLUKA 450383_ALDRICH Phenethylene Phenylethene Stirolo 81406_FLUKA 459356_ALDRICH Styreen 441147_ALDRICH Styrene (monomer) Styrene monomer, inhibited 53397_FLUKA 459364_ALDRICH Styrene monomer, inhibited [UN2055] [Flammable liquid] Styrol [German] UN20…	79637-11-9 68441-35-0 68987-41-7 9003-53-6 100-42-5 12770-88-6
CCOCC	Ethoxyethane	Ethoxyethane 60-29-7 74446-43-8 7578-39-4 69227-20-9 70131-58-7 68991-48-0 71011-10-4 69013-19-0 443549_SIAL 31700_FLUKA CHEBI:35702 Amines, C20-22-alkyl, ethoxylated (C20-C22)Alkylamine diethoxylate Alcohols, C8-22, ethoxylated Oxyde d'ethyle 31690_FLUKA Alcohols, C14-26, ethoxylated 34942_RIEDEL Ethylether Dwuetylowy eter Etere etilico Ether ethylique NSC100036 346144_ALDRICH WLN: 2O2 676837_SI…	60-29-7 74446-43-8 7578-39-4 69227-20-9 70131-58-7 68991-48-0 71011-10-4 69013-19-0
CCCCCC=CCC=CCC=CCC=CCCCC(=O)OCC	ethyl (5E,8E,11E,14E)-icosa-5,8,11,14-tetraenoate ethyl icosa-5,8,11,14-tetraenoate	ethyl (5E,8E,11E,14E)-icosa-5,8,11,14-tetraenoate ethyl icosa-5,8,11,14-tetraenoate (5E,8E,11E,14E)-icosa-5,8,11,14-tetraenoic acid ethyl ester icosa-5,8,11,14-tetraenoic acid ethyl ester
CCCCCC=CCC=CCCCCCCCC(=O)OCC	ethyl (9E,12E)-octadeca-9,12-dienoate ethyl octadeca-9,12-dienoate	ethyl (9E,12E)-octadeca-9,12-dienoate ethyl octadeca-9,12-dienoate (9E,12E)-octadeca-9,12-dienoic acid ethyl ester octadeca-9,12-dienoic acid ethyl ester 9,12-Octadecadienoic acid (Z,Z)-, ethyl ester (9CI) 9,12-Octadecadienoic acid ethyl ester 9,12-Octadecadienoic acid, ethyl ester EINECS 208-868-4 Ethyl linoleate [JAN] Ethyl linoleate, pure Linoleic acid, ethyl ester (8CI) NSC 50447 Ethyl linole…
CCOC(=O)CC=CCC		ethyl (E)-hex-3-enoate Ethyl hex-3-enoate (E)-hex-3-enoic acid ethyl ester hex-3-enoic acid ethyl ester 2396-83-0 26553-46-8 ZINC01850847 3-Hexenoic acid, ethyl ester, (3E)- 3-Hexenoic acid, ethyl ester, (E)- 340294_ALDRICH Ethyl (E)-3-hexenoate Ethyl (E)hex-3-enoate Ethyl trans-3-hexenoate EINECS 247-798-9 W334200_ALDRICH 3-Hexenoic acid, ethyl ester EINECS 219-257-7 ETHYL 3-HEXENOATE Ethyl 3-he…
CCOC(=O)CC1(C)OC(C)CO1	ethyl 2-(2,4-dimethyl-1,3-dioxolan-2-yl)acetate	ethyl 2-(2,4-dimethyl-1,3-dioxolan-2-yl)acetate 2-(2,4-dimethyl-1,3-dioxolan-2-yl)acetic acid ethyl ester ethyl 2-(2,4-dimethyl-1,3-dioxolan-2-yl)ethanoate 6290-17-1 1,3-Dioxolane-2-acetic acid, 2,4-dimethyl-, ethyl ester Acetoacetic acid, ethyl ester, 1,2-propylene ketal Ethyl 2,4-dimethyl-1,3-dioxolane-2-acetate NSC6547 EINECS 228-536-2 Ethyl acetoacetate propylene glycol ketal NSC 6547 Ethyl d…	6290-17-1
CCOC(=O)COc1ccccc1	ethyl 2-(phenoxy)acetate	ethyl 2-(phenoxy)acetate 2-(phenoxy)acetic acid ethyl ester ethyl 2-(phenoxy)ethanoate 2555-49-9 ETHYL PHENOXYACETATE ZINC00397506 ST5405873 462934_ALDRICH AIDS-017858 AIDS017858 Phenoxyacetic acid, ethyl ester AI3-04110 Acetic acid, phenoxy-, ethyl ester EINECS 219-867-3	2555-49-9
CC1CCC(CNc2ccccc2C(=O)OCC)C(C)C=1	ethyl 2-[(2,4-dimethyl-1-cyclohex-3-enyl)methylamino]benzoate	ethyl 2-[(2,4-dimethyl-1-cyclohex-3-enyl)methylamino]benzoate 2-[(2,4-dimethyl-1-cyclohex-3-enyl)methylamino]benzoic acid ethyl ester 68228-09-1 EINECS 269-404-4 Ethyl 2-(((2,4(or3,5)-dimethyl-3-cyclohexen-1-yl)methyl)amino)benzoate Anthranilic acid, N-(2,4(or 3,5)-dimethyl-3-cyclohexen-1-yl)-, ethyl ester (Schiff base) Benzoic acid, 2-(((2,4(or 3,5)-dimethyl-3-cyclohexen-1-yl)methyl)amino)-, eth…	68228-09-1
CCOC(=O)c1ccccc1N	Ethyl 2-aminobenzoate	Ethyl 2-aminobenzoate 2-Aminobenzoic acid ethyl ester 87-25-2 NCGC00091211-01 2-(Ethoxycarbonyl)aniline 2-Carboethoxyaniline 4-14-00-01008 (Beilstein Handbook Reference) AI3-02377 Anthranilic acid, ethyl ester (6CI,7CI,8CI) BRN 0878874 CCRIS 6238 EINECS 201-735-1 FEMA No. 2421 HSDB 404 NSC 4146 2-Aminobenzoic acid, ethyl ester Anthranilic acid, ethyl ester Benzoic acid, 2-amino-, ethyl ester Benz…
CCOC(=O)C(=C)C#N	ethyl 2-cyanoprop-2-enoate	ethyl 2-cyanoprop-2-enoate 2-cyanoprop-2-enoic acid ethyl ester 2-cyanoacrylic acid ethyl ester 25067-30-5 54500-42-4 106717-55-9 111940-93-3 112002-50-3 7085-85-0 2-Cyano-2-propenoic acid, ethylester, homopolymer 2-Propenoic acid, 2-cyano-, ethyl ester, homopolymer Cyacrin Poly(ethyl 2-cyanoacrylate) 2-Propenoic acid, 2-cyano-, ethyl ester Acrylic acid, 2-cyano-, ethyl ester CCRIS 1693 EINECS 23…	25067-30-5 54500-42-4 106717-55-9 111940-93-3 112002-50-3 7085-85-0
CC(CC)C(=O)OCC		Ethyl 2-methylbutanoate 2-methylbutanoic acid ethyl ester 2-methylbutyric acid ethyl ester 7452-79-1 53956-13-1 306886_ALDRICH InChI=1/C7H14O2/c1-4-6(3)7(8)9-5-2/h6H,4-5H2,1-3H Butanoic acid, 2-methyl-, ethyl ester, (.+-.)- Butanoic acid, 2-methyl-, ethyl ester Butyric acid, 2-methyl-, ethyl ester Ethyl .alpha.-methylbutyrate Ethyl 2-methylbutyrate NSC1103 AI3-35155 Butyric acid, 2-methyl-, ethyl…	7452-79-1 53956-13-1
CCOC(=O)C(C)CCC	Ethyl 2-methylpentanoate	Ethyl 2-methylpentanoate 2-methylpentanoic acid ethyl ester 2-methylvaleric acid ethyl ester 39255-32-8 AI3-33618 EINECS 254-384-1 Ethyl 2-methylvalerate Ethyl alpha-methylvalerate FEMA No. 3488 Pentanoic acid, 2-methyl-, ethyl ester W348805_ALDRICH Ethyl .alpha.-methylvalerate	39255-32-8
CC(=C)C(=O)OCC	ethyl 2-methylprop-2-enoate	ethyl 2-methylprop-2-enoate 2-methylprop-2-enoic acid ethyl ester 2-methylacrylic acid ethyl ester 133775-64-1 137431-11-9 179799-95-2 187170-02-1 61584-93-8 9003-42-3 97-63-2 128440-92-6 182087_ALDRICH Poly(ethyl methacrylate) 183350_ALDRICH ZINC01608906 2-Propenoic acid, 2-methyl, homopolymer, ethyl ester 81587_FLUKA 65852_FLUKA 2-Methylacrylic acid, ethyl ester 2-Propenoic acid, 2-methyl-, eth…	133775-64-1 137431-11-9 179799-95-2 187170-02-1 61584-93-8 9003-42-3 97-63-2 128440-92-6
CCOC(=O)C(C)C		Ethyl 2-methylpropanoate 2-methylpropanoic acid ethyl ester 2-methylpropionic acid ethyl ester 97-62-1 InChI=1/C6H12O2/c1-4-8-6(7)5(2)3/h5H,4H2,1-3H W242802_ALDRICH W242810_ALDRICH ZINC00391109 4-02-00-00846 (Beilstein Handbook Reference) AI3-06121 BRN 0773846 EINECS 202-595-4 ETHYL ISOBUTYRATE Ethyl 2,2-dimethylacetate Ethyl 2-methylpropionate Ethyl isobutanoate Ethyl isobutyrate (natural) Ethyl…	97-62-1
CCOC(=O)Cc1ccccc1	ethyl 2-phenylacetate	ethyl 2-phenylacetate 2-phenylacetic acid ethyl ester Ethyl 2-phenylethanoate 101-97-3 Benzeneacetic acid, ethyl ester Ethyl .alpha.-toluate Ethyl benzeneacetate Ethyl phenacetate Ethyl phenylacetate Ethyl phenylethanoate NSC8894 Phenylacetic acid, ethyl ester WLN: 2OV1R 239445_ALDRICH InChI=1/C10H12O2/c1-2-12-10(11)8-9-6-4-3-5-7-9/h3-7H,2,8H2,1H PHENYL-ACETIC ACID,ETHYL ESTER AIDS-017650 AIDS017…
CCOC(=O)CS	ethyl 2-sulfanylacetate	ethyl 2-sulfanylacetate 2-mercaptoacetic acid ethyl ester ethyl 2-sulfanylethanoate 623-51-8 AIDS-018223 AIDS018223 Mercaptoacetic acid, ethyl ester 4-03-00-00616 (Beilstein Handbook Reference) AI3-23030 BRN 0605581 EINECS 210-800-3 Mercaptoacetic acid ethyl ester NSC 8834 ACETIC ACID,MERCAPTO,ETHYL ESTER InChI=1/C4H8O2S/c1-2-6-4(5)3-7/h7H,2-3H2,1H Thioglycolic acid ethyl ester Thioglykolsaeure-a…	623-51-8
CC(=O)N(CCCC)CCC(=O)OCC	ethyl 3-(acetyl-butylamino)propanoate	ethyl 3-(acetyl-butylamino)propanoate ethyl 3-(acetyl-butyl-amino)propanoate 3-(acetyl-butylamino)propanoic acid ethyl ester 3-(acetyl-butyl-amino)propionic acid ethyl ester ethyl 3-(butyl-ethanoyl-amino)propanoate 362607-57-6 52304-36-6 N-Acetyl-N-butyl-beta-alanine, ethyl ester Repellent 3535 beta-alanine, N-acetyl-N-butyl-, ethyl ester 3-(N-n-Butyl-N-acetyl)aminopropionic acid ethyl ester AI 3…	362607-57-6 52304-36-6
CCOC(=O)CC(C)CC(C)(C)C	Ethyl 3,5,5-trimethylhexanoate	Ethyl 3,5,5-trimethylhexanoate 3,5,5-trimethylhexanoic acid ethyl ester 67707-75-9 3,5,5-Trimethyl-ethylcapronate EINECS 266-959-4 Hexanoic acid, 3,5,5-trimethyl-, ethyl ester	67707-75-9
CCOC(=O)CC(=O)c1ccccc1	Ethyl 3-oxo-3-phenylpropanoate	Ethyl 3-oxo-3-phenylpropanoate ethyl 3-oxo-3-phenyl-propanoate 3-oxo-3-phenylpropanoic acid ethyl ester 3-keto-3-phenyl-propionic acid ethyl ester 94-02-0 ST5214357 3-OXO,3-PHENYL-PROPANOIC ACID,ETHYL ESTER InChI=1/C11H12O3/c1-2-14-11(13)8-10(12)9-6-4-3-5-7-9/h3-7H,2,8H2,1H W242306_ALDRICH 12990_FLUKA 281492_ALDRICH 1-Ethoxy-3-phenylpropane-1,3-dione 4-10-00-02756 (Beilstein Handbook Reference) A…	94-02-0
CC(=O)CCC(=O)OCC	Ethyl 4-oxopentanoate	Ethyl 4-oxopentanoate 4-oxopentanoic acid ethyl ester 4-ketovaleric acid ethyl ester 539-88-8 122629_ALDRICH ZINC03860971 W244201_ALDRICH 61395_FLUKA NSC24876 4-03-00-01562 (Beilstein Handbook Reference) AI3-00677 BRN 0507641 EINECS 208-728-2 Ethyl acetylpropanoate Ethyl ketovalerate Ethyl levulinate (natural) FEMA No. 2442 NSC 24876 ELA Ethyl 3-acetylpropionate Ethyl 4-ketovalerate Ethyl 4-oxova…	539-88-8
CCOC(=O)C1CCC(=O)N1	ethyl 5-oxopyrrolidine-2-carboxylate	ethyl 5-oxopyrrolidine-2-carboxylate 5-oxo-2-pyrrolidinecarboxylic acid ethyl ester 5-ketopyrrolidine-2-carboxylic acid ethyl ester 66183-71-9 7149-65-7 2-Pyrrolidinecarboxylic acid-5-oxo-, ethyl ester Ethyl 5-oxo-L-prolinate NCIOpen2_000435 EINECS 230-480-9 NSC166529 NSC72279 EINECS 266-226-9 Ethyl 5-oxo-DL-prolinate	66183-71-9 7149-65-7
CCOC(=O)C1C(=C)C=CCC1(C)C	ethyl 6,6-dimethyl-2-methylidenecyclohex-3-ene-1-carboxylate	ethyl 6,6-dimethyl-2-methylidenecyclohex-3-ene-1-carboxylate ethyl 6,6-dimethyl-2-methylene-cyclohex-3-ene-1-carboxylate 6,6-dimethyl-2-methylene-1-cyclohex-3-enecarboxylic acid ethyl ester 6,6-dimethyl-2-methylene-cyclohex-3-ene-1-carboxylic acid ethyl ester ethyl 6,6-dimethyl-2-methylidene-cyclohex-3-ene-1-carboxylate 35044-58-7 3-Cyclohexene-1-carboxylic acid, 6,6-dimethyl-2-methylene-, ethyl …
CC(=O)OCCCCCC(=O)OCC	ethyl 6-acetyloxyhexanoate	ethyl 6-acetyloxyhexanoate Ethyl 6-acetoxyhexanoate 6-acetoxyhexanoic acid ethyl ester 104986-28-9 Hexanoic acid, 6-(acetyloxy)-, ethyl ester	104986-28-9
CCOC(C)=O	Ethyl acetate	Ethyl acetate Acetic acid ethyl ester Ethyl ethanoate 141-78-6 HSDB 83 NSC 70930 Octan etylu [Polish] RCRA waste no. U112 RCRA waste number U112 UN1173 676810_SIAL ST5214347 1-acetoxyethane 45767_FLUKA NCGC00091766-01 33211_RIEDEL Acetic ester 09652_FLUKA EEE 34490_RIEDEL LS-831 320307_ALDRICH InChI=1/C4H8O2/c1-3-6-4(2)5/h3H2,1-2H 154857_SIAL ZINC00895412 319902_SIAL Ethyl acetate (NF) 650528_ALD…
CCOC(=O)CCC	Ethyl butanoate	Ethyl butanoate Butanoic acid ethyl ester butyric acid ethyl ester 105-54-4 LS-2361 W242705_ALDRICH W242713_ALDRICH E15701_ALDRICH Butanoic acid, ethyl ester Butyric acid, ethyl ester Butyric ester Butyric ether Ethyl butyrate Ethyl n-butyrate NSC8857 WLN: 3VO2 75563_FLUKA InChI=1/C6H12O2/c1-3-5-6(7)8-4-2/h3-5H2,1-2H ZINC00404390 4-02-00-00787 (Beilstein Handbook Reference) AI3-18427 BRN 0506331 …
CCOC=O	Ethyl formate	Ethyl formate formic acid ethyl ester Ethyl methanoate 109-94-4 AI3-00407 Aethylformiat [German] Carboxylic acid oxaethane Caswell No. 443A EINECS 203-721-0 EPA Pesticide Chemical Code 043102 Ethyl formate (natural) Ethyl formate [UN1190] [Flammable liquid] Ethyle (formiate d') [French] Ethylester kyseliny mravenci [Czech] Ethylformiaat [Dutch] Etile (formiato di) [Italian] FEMA No. 2434 FEMA Num…	109-94-4
CCC(=O)OCC	Ethyl propanoate	Ethyl propanoate 105-37-3 ZINC00388078 W245615_ALDRICH Propanoic acid, ethyl ester LS-2360 Ethylester kyseliny propionove [Czech] FEMA No. 2456 96727_FLUKA HSDB 5366 NSC 8848 Ethylpropionate WLN: 2VO2 UN1195 81920_FLUKA CA1 InChI=1/C5H10O2/c1-3-5(6)7-4-2/h3-4H2,1-2H 112305_ALDRICH 4-02-00-00705 (Beilstein Handbook Reference) AI3-24354 Ethyl propionate NSC8848 Ethyl propionate [UN1195] [Flammable …
CCc1ccccc1	Ethylbenzene	Ethylbenzene 70955-17-8 68908-88-3 100-41-4 28213-80-1 CHEBI:16101 alpha-methyltoluene 03080_FLUKA 48534_SUPELCO c0116 LS-303 ST5214487 296848_ALDRICH AI3-09057 Aethylbenzol [German] Benzene, ethyl- CCRIS 916 EB EINECS 202-849-4 Ethyl benzene Ethylbenzeen [Dutch] Ethylbenzene [UN1175] [Flammable liquid] Etilbenzene [Italian] Etylobenzen [Polish] HSDB 84 NCI-C56393 NSC 406903 UN1175 48621_SUPELCO …	70955-17-8 68908-88-3 100-41-4 28213-80-1
CC[N+](C)(C)CCCNC(=O)CCCCCCCCCCCCCCC(C)C		ethyl-dimethyl-[3-(16-methylheptadecanoylamino)propyl]azanium ethyl-dimethyl-[3-(16-methylheptadecanoylamino)propyl]ammonium ethyl-dimethyl-[3-[(16-methyl-1-oxoheptadecyl)amino]propyl]ammonium
CCCCCCCCCCCCCCCCCC(=O)NCCC[N+](C)(C)CC		ethyl-dimethyl-[3-(octadecanoylamino)propyl]azanium ethyl-dimethyl-[3-(octadecanoylamino)propyl]ammonium ethyl-dimethyl-[3-(1-oxooctadecylamino)propyl]ammonium ethyl-dimethyl-(3-stearamidopropyl)ammonium
CC[Si](C)(O[Si](C)(C)C)O[Si](C)(C)C	ethyl-methyl-bis(trimethylsilyloxy)silane	ethyl-methyl-bis(trimethylsilyloxy)silane 17861-60-8 Trisiloxane, 3-ethyl-1,1,1,3,5,5,5-heptamethyl-
O=Cc1ccco1	furan-2-carbaldehyde	furan-2-carbaldehyde 2-Furancarboxaldehyde FURFURAL 98-01-1 UN1199 2-Furil-metanale [Italian] 2-Furylcarboxaldehyde 185914_ALDRICH 2-Furaldehyde, purified Furan-2-carboxaldehyde 5-17-09-00292 (Beilstein Handbook Reference) 2-Formylofuran [Polish] .alpha.-Furole 2-Formylfuran 2-Furaldehyde 2-Furanaldehyde 2-Furancarbonal 2-Furfural 2-Furfuraldehyde 2-Furil-metanale 2-Furyl-methanal 2-Furylaldehyde…	98-01-1
OCc1ccco1	furan-2-ylmethanol	furan-2-ylmethanol 2-Furylmethanol 88161-36-8 93793-62-5 98-00-0 25212-86-6 2-Furfurylalkohol [Czech] 2-Hydroxymethylfuran 5-17-03-00338 (Beilstein Handbook Reference) AI3-01171 BRN 0106291 CCRIS 2922 EINECS 202-626-1 FEMA No. 2491 Furfural alcohol Furfuranol Furfuryl alcohol [UN2874] [Poison] Furfurylcarb Furylcarbinol (VAN) HSDB 711 NSC 8843 UN2874 alpha-Furylcarbinol SBB004373 185930_ALDRICH (…
NC(N)=N		GUANIDINE GAI NCIOpen2_007946 50-01-1 (HCL) 593-85-1 (CARBONATE, 2:1) 594-14-9 (SULFATE, 2:1) AIDS-122342 AIDS122342 Guanidine, Hydrochloride NSC7296 (SULFATE, 2:1) 4-03-00-00148 (Beilstein Handbook Reference) Aminoformamidine Aminomethanamidine BRN 0506044 Carbamamidine Carbamidine EINECS 204-021-8 Imidourea Iminourea CHEBI:42820 Gu Guanidin H2N-C(=NH)-NH2
CCCCCCCOC(=O)CS		heptyl 2-sulfanylacetate 2-mercaptoacetic acid heptyl ester heptyl 2-sulfanylethanoate 39583-10-3 Heptyl mercaptoacetate Acetic acid, mercapto-, heptyl ester EINECS 254-530-4	39583-10-3
CCCCC=C	hex-1-ene	hex-1-ene 153522-12-4 33004-04-5 68526-99-8 592-41-6 68783-15-3 1-Hexene [UN2370] [Flammable liquid] AI3-28797 Butyl ethylene Dialene 6 EINECS 209-753-1 HSDB 1079 Hexene Hexylene NSC 74121 UN2370 (C6-C7) alpha olefins(petroleum) Alkenes, C6-7 alpha- EINECS 272-188-4 InChI=1/C6H12/c1-3-5-6-4-2/h3H,1,4-6H2,2H 240761_ALDRICH 230545_ALDRICH Alkenes, C6-9 alpha- EINECS 271-244-5 alpha olefins (petrole…	153522-12-4 33004-04-5 68526-99-8 592-41-6 68783-15-3
CCCC(=O)OCC=CCCC	hex-2-enyl butanoate [(E)-hex-2-enyl] butanoate	hex-2-enyl butanoate [(E)-hex-2-enyl] butanoate butanoic acid hex-2-enyl ester butanoic acid [(E)-hex-2-enyl] ester butyric acid hex-2-enyl ester butyric acid [(E)-hex-2-enyl] ester 53398-83-7 EINECS 258-515-3 (E)-Hex-2-enyl butyrate AI3-35967 Butanoic acid, (2E)-2-hexenyl ester Butanoic acid, 2-hexenyl ester, (E)- W392618_ALDRICH trans-2-Hexenyl butyrate (Z)-2-Hexenyl butanoate
CC(=CC)C(=O)OCCC=CCC		hex-3-enyl 2-methylbut-2-enoate [(E)-hex-3-enyl] (E)-2-methylbut-2-enoate 2-methylbut-2-enoic acid hex-3-enyl ester (E)-2-methylbut-2-enoic acid [(E)-hex-3-enyl] ester 84060-80-0 cis-3-Hexenyl angelate (Z,Z)-3-Hexenyl 2-methyl-2-butenoate EINECS 281-904-4	84060-80-0
CCC=CCCOC(=O)CC(C)C		hex-3-enyl 3-methylbutanoate [(E)-hex-3-enyl] 3-methylbutanoate 3-methylbutanoic acid hex-3-enyl ester 3-methylbutanoic acid [(E)-hex-3-enyl] ester 3-methylbutyric acid hex-3-enyl ester 3-methylbutyric acid [(E)-hex-3-enyl] ester
CCC=CCCOC(C)=O		Hex-3-enyl acetate [(E)-hex-3-enyl] acetate acetic acid [(E)-hex-3-enyl] ester acetic acid hex-3-enyl ester [(E)-hex-3-enyl] ethanoate hex-3-enyl ethanoate 3681-82-1 1708-82-3 (E)-Hex-3-enyl acetate 3-Hexen-1-ol, acetate, (3E)- 3-Hexen-1-ol, acetate, (E)- AI3-33358 EINECS 222-962-2 3-HEXENE-1-OL ACETATE 3-Hexen-1-ol, acetate EINECS 216-965-8 trans-3-Hexenyl acetate (3E)-3-Hexenyl acetate	3681-82-1 1708-82-3
CCC=CCCOC(=O)c1ccccc1	Hex-3-enyl benzoate [(E)-hex-3-enyl] benzoate	Hex-3-enyl benzoate [(E)-hex-3-enyl] benzoate benzoic acid [(E)-hex-3-enyl] ester benzoic acid hex-3-enyl ester 72200-74-9 EINECS 276-454-0 3-Hexen-1-ol, benzoate (E)-3-Hexenyl benzoate (E)-hex-3-enyl benzoate
CCC=CCCOC(=O)CCC		hex-3-enyl butanoate [(E)-hex-3-enyl] butanoate butanoic acid [(E)-hex-3-enyl] ester butanoic acid hex-3-enyl ester butyric acid [(E)-hex-3-enyl] ester butyric acid hex-3-enyl ester 53398-84-8 Butanoic acid, (3E)-3-hexenyl ester Butanoic acid, 3-hexenyl ester, (E)- EINECS 258-516-9 3-Hexen-1-ol, butanoate 3-Hexenyl butyrate trans-3-Hexenyl Butyrate (E)-Hex-3-enyl butyrate 3-Hexenyl butyrate (E) A…
CCC=CCCOC(=O)CCCCC		Hex-3-enyl hexanoate [(E)-hex-3-enyl] hexanoate hexanoic acid hex-3-enyl ester hexanoic acid [(E)-hex-3-enyl] ester 84434-19-5 56922-82-8 (Z)-3-Hexen-1-ol, hexanoate Cyclohexylethyl N,N-diisopropylphosphoramidocyanidate Hexanoic acid, 3-hexenyl ester EINECS 282-819-5 (E)-3-Hexen-1-ol, hexanoate (E)-Hex-3-enyl hexanoate EINECS 260-444-8 Hexanoic acid, 3-hexenyl ester, (E)-
CC=CC=CCOC(=O)C(C)C	hexa-2,4-dienyl 2-methylpropanoate [(2E,4E)-hexa-2,4-dienyl] 2-methylpropanoate	hexa-2,4-dienyl 2-methylpropanoate [(2E,4E)-hexa-2,4-dienyl] 2-methylpropanoate 2-methylpropanoic acid [(2E,4E)-hexa-2,4-dienyl] ester 2-methylpropanoic acid hexa-2,4-dienyl ester 2-methylpropionic acid [(2E,4E)-hexa-2,4-dienyl] ester 2-methylpropionic acid hexa-2,4-dienyl ester 73545-16-1 Propanoic acid, 2-methyl-, (2E,4E)-2,4-hexadienyl ester Propanoic acid, 2-methyl-, 2,4-hexadienyl ester, (E,…	73545-16-1
CC(=O)CCC(C)=O		hexane-2,5-dione 110-13-4 ST5214379 ZINC01683671 2,5-Hexandione 4-01-00-03688 (Beilstein Handbook Reference) AI3-02399 Acetonylacetone BRN 0506525 CCRIS 2919 EINECS 203-738-3 NSC 7621 alpha,beta-Diacetylethane NCGC00091466-01 165131_ALDRICH 15972_FLUKA InChI=1/C6H10O2/c1-5(7)3-4-6(2)8/h3-4H2,1-2H 10890_FLUKA 00770_FLUKA .alpha.,.beta.-Diacetylethane 1,2-Diacetylethane 2,5-Diketohexane 2,5-Hexadio…	110-13-4
CCCCCCOC(=O)C(C)(C)C	Hexyl 2,2-dimethylpropanoate	Hexyl 2,2-dimethylpropanoate 2,2-dimethylpropanoic acid hexyl ester 2,2-dimethylpropionic acid hexyl ester 5434-57-1 1-Hexyl pivalate Hexyl neopentanoate Hexyl pivalate NSC15684 Pivalic acid, hexyl ester Propanoic acid, 2,2-dimethyl-, hexyl ester EINECS 226-602-5 Hexyl 2,2-dimethylpropionate NSC 15684 Propanoic acid, 2,2-dimethyl-, n-hexyl ester AI3-20486 BRN 2205493	5434-57-1
CCCCCCOC(=O)C(C)CC		Hexyl 2-methylbutanoate 2-methylbutanoic acid hexyl ester 2-methylbutyric acid hexyl ester 10032-15-2 144810-17-3 AI3-33623 BRN 1856407 BUTYRIC ACID, 2-METHYL-, HEXYL ESTER Butanoic acid, 2-methyl-, hexyl ester EINECS 233-106-2 FEMA No. 3499 Hexyl 2-methylbutanoate (natural) Hexyl 2-methylbutyrate W349909_ALDRICH 2-Methylbutanoic acid, n-hexyl ester	10032-15-2 144810-17-3
CCCCCCOC(=O)CC(C)C	Hexyl 3-methylbutanoate	Hexyl 3-methylbutanoate 3-methylbutanoic acid hexyl ester 3-Methylbutyric acid hexyl ester 10032-13-0 W350001_ALDRICH n-Hexyl iso-valerate AI3-33585 BRN 1759161 Butanoic acid, 3-methyl-, hexyl ester EINECS 233-105-7 FEMA No. 3500 Hexyl 3-methyl butanoate Hexyl 3-methylbutanoate (natural) Hexyl isopentanoate Hexyl isovalerate Hexyl isovalerianate Hexyl isovaleriate Isovaleric acid, hexyl ester Iso…	10032-13-0
CCC=CCC=CCC=CCC=CCC=CCCCC(O)=O	icosa-5,8,11,14,17-pentaenoic acid (5E,8E,11E,14E,17E)-icosa-5,8,11,14,17-pentaenoic acid	icosa-5,8,11,14,17-pentaenoic acid (5E,8E,11E,14E,17E)-icosa-5,8,11,14,17-pentaenoic acid 1553-41-9 KBio2_000048 KBio2_002616 CBiol_001944 KBio2_005184 Bio1_000230 KBioSS_000048 Bio1_001208 Bio2_000048 5,8,11,14,17-EICOSAPENTAENOIC ACID KBio3_000096 5, 8, 11, 14, 17-icosapentaenoic acid LMFA01030181 Bio2_000528 KBioGR_000048 Bio1_000719 KBio3_000095
CCCCCC=CCC=CCC=CCC=CCCCC(O)=O	Icosa-5,8,11,14-tetraenoic acid (5E,8E,11E,14E)-icosa-5,8,11,14-tetraenoic acid	Icosa-5,8,11,14-tetraenoic acid (5E,8E,11E,14E)-icosa-5,8,11,14-tetraenoic acid 506-32-1 7771-44-0 CCRIS 6312 EINECS 208-033-4 SpecPlus_000727 KBio2_000511 KBio2_003079 Spectrum4_000905 KBio2_000259 KBio2_002827 KBio2_005395 Bio2_000259 KBio3_000517 KBio3_000518 CBiol_001948 5,8,11,14-Eicosatetraenoic acid / 5,8,11,14-icosatetraenoic acid LMFA01030393 KBio1_001767 Eicosanetetraenoic acid Spectrum…	506-32-1 7771-44-0
O=C1NCCN1		imidazolidin-2-one 4,5-didehydro-1,3-dihydroimidazol-2-one 2-Imidazolidinone 120-93-4 121325-67-5 76895-63-1 03850_FLUKA 45731_RIEDEL 2-Oxomidazolidine AI3-22151 EINECS 204-436-4 Ethylene urea HSDB 4021 1,3-Ethyleneurea 2-Imidazolidone 2-Oxoimidazolidine Ethyleneurea Imidazolid-2-one N,N'-Ethyleneurea NSC3338 SD 6073 Urea, 1,3-ethylene- Urea, N,N'-(1,2-ethanediyl)- WLN: T5MVMTJ CHEBI:37001 Monoet…	120-93-4 121325-67-5 76895-63-1
COC=C	Methoxyethene	Methoxyethene Methoxyethylene 56258-15-2 9003-09-2 107-25-5 132697-29-1 51109-47-8 Ethene, methoxy-, homopolymer Gantre M-154 Gantrez M Gantrez M 093 Gantrez M 094 Gantrez M 154 Gantrez M 574 Gantrez M555 Lutonal M-40 InChI=1/C3H6O/c1-3-4-2/h3H,1H2,2H Methyl vinyl ether homopolymer Methyl vinyl ether polymer Poly(methyl vinyl ether) Poly(vinyl methyl ether) Polyvinyl Methyl Ether Texapret WL Viny…	56258-15-2 9003-09-2 107-25-5 132697-29-1 51109-47-8
COCc1ccccc1	METHOXYMETHYLBENZENE	METHOXYMETHYLBENZENE 538-86-3 InChI=1/C8H10O/c1-9-7-8-5-3-2-4-6-8/h2-6H,7H2,1H ZINC01586379 AI3-21993 EINECS 208-705-7 Ether, benzyl methyl (8CI) NSC 8058 alpha-Methoxytoluene (methoxymethyl)benzene FR-1351 476730_ALDRICH .alpha.-Methoxytoluene Benzene, (methoxymethyl)- Benzyl methyl ether Ether, benzyl methyl Methyl benzyl ether NSC8058 ST5410734	538-86-3
CCC=CCC=CCC=CCCCCCCCC(=O)OC	methyl (9E,12E,15E)-octadeca-9,12,15-trienoate methyl octadeca-9,12,15-trienoate	methyl (9E,12E,15E)-octadeca-9,12,15-trienoate methyl octadeca-9,12,15-trienoate (9E,12E,15E)-octadeca-9,12,15-trienoic acid methyl ester octadeca-9,12,15-trienoic acid methyl ester 7361-80-0 9,12,15-Octadecatrienoic acid, methyl ester Methyl 9,12,15-octadecatrienoate Linolenic acid methyl ester NSC607759 NCI60_004707	7361-80-0
CC(=O)OC(CC=CCCCCCCCC(=O)OC)CCCCCC	methyl (E)-12-acetyloxyoctadec-9-enoate methyl 12-acetyloxyoctadec-9-enoate	methyl (E)-12-acetyloxyoctadec-9-enoate methyl 12-acetyloxyoctadec-9-enoate methyl (E)-12-acetoxyoctadec-9-enoate methyl 12-acetoxyoctadec-9-enoate 12-acetoxyoctadec-9-enoic acid methyl ester (E)-12-acetoxyoctadec-9-enoic acid methyl ester 4648-28-6 NSC163485	4648-28-6
CCCCCCC(O)CC=CCCCCCCCC(=O)OC		methyl 12-hydroxyoctadec-9-enoate methyl (E)-12-hydroxyoctadec-9-enoate 12-hydroxyoctadec-9-enoic acid methyl ester (E)-12-hydroxyoctadec-9-enoic acid methyl ester Methyl trans-12-hydroxy-9-octadecenoate R8500_SIGMA Ricinelaidic acid methyl ester Methyl ricinelaidate
CC1CCC(=CNc2ccccc2C(=O)OC)C(C)C=1	methyl 2-[[(E)-(2,4-dimethyl-1-cyclohex-3-enylidene)methyl]amino]benzoate	methyl 2-[[(E)-(2,4-dimethyl-1-cyclohex-3-enylidene)methyl]amino]benzoate 2-[[(E)-(2,4-dimethyl-1-cyclohex-3-enylidene)methyl]amino]benzoic acid methyl ester 68738-99-8 Methyl 2-(((2,4(or 3,5)-dimethyl-3-cyclohexen-1-yl)methylene)amino)benzoate Benzoic acid, 2-(((2,4(or 3,5)-dimethyl-3-cyclohexen-1-yl)methylene)amino)-, methyl ester EINECS 272-124-5 Methyl (3,5-dimethyl-3-cyclohexene-1-yl)methyle…	68738-99-8
CC(Cc1ccc(cc1)C(C)(C)C)=CNc1ccccc1C(=O)OC	methyl 2-[[(E)-3-(4-tert-butylphenyl)-2-methylprop-1-enyl]amino]benzoate	methyl 2-[[(E)-3-(4-tert-butylphenyl)-2-methylprop-1-enyl]amino]benzoate methyl 2-[[(E)-3-(4-tert-butylphenyl)-2-methyl-prop-1-enyl]amino]benzoate 2-[[(E)-3-(4-tert-butylphenyl)-2-methylprop-1-enyl]amino]benzoic acid methyl ester 2-[[(E)-3-(4-tert-butylphenyl)-2-methyl-prop-1-enyl]amino]benzoic acid methyl ester
CCC=CCC1C(CC(=O)OC)CCC1=O	methyl 2-[3-oxo-2-[(E)-pent-2-enyl]cyclopentyl]acetate methyl 2-(3-oxo-2-pent-2-enylcyclopentyl)acetate	methyl 2-[3-oxo-2-[(E)-pent-2-enyl]cyclopentyl]acetate methyl 2-(3-oxo-2-pent-2-enylcyclopentyl)acetate methyl 2-(3-oxo-2-pent-2-enyl-cyclopentyl)acetate 2-[3-oxo-2-[(E)-pent-2-enyl]cyclopentyl]acetic acid methyl ester 2-(3-oxo-2-pent-2-enylcyclopentyl)acetic acid methyl ester 2-(3-keto-2-pent-2-enyl-cyclopentyl)acetic acid methyl ester 2-[3-keto-2-[(E)-pent-2-enyl]cyclopentyl]acetic acid methyl …	39924-52-2
COC(=O)C(N)CSSCC(N)C(=O)OC	methyl 2-amino-3-(2-amino-3-methoxy-3-oxopropyl)disulfanylpropanoate	methyl 2-amino-3-(2-amino-3-methoxy-3-oxopropyl)disulfanylpropanoate methyl 2-amino-3-(2-amino-3-methoxy-3-oxo-propyl)disulfanyl-propanoate 2-amino-3-(2-amino-3-methoxy-3-oxopropyl)disulfanylpropanoic acid methyl ester 2-amino-3-(2-amino-3-keto-3-methoxy-propyl)disulfanyl-propionic acid methyl ester 1069-29-0 32854-09-4 (HYDROCHLORIDE SALT) AIDS-157354 AIDS157354 NSC638592 (HYDROCHLORIDE SALT) l-…	1069-29-0
COC(=O)c1ccccc1N	Methyl 2-aminobenzoate	Methyl 2-aminobenzoate 2-Aminobenzoic acid methyl ester 134-20-3 2-(Methoxycarbonyl)aniline Anthranilic acid methyl ester Anthranilic acid, methyl ester Benzoic acid, 2-amino-, methyl ester Methyl anthranilate Methyl o-aminobenzoate NSC3109 Nevoli oil WLN: ZR BVO1 o-Aminobenzoic acid, methyl ester o-Carbomethoxyaniline PS2055_SUPELCO 2-Aminobenzoic acid, methyl ester 2-Carbomethoxyaniline AI3-010…	134-20-3
COC(=O)C=C1CCCC1	methyl 2-cyclopentylideneacetate	methyl 2-cyclopentylideneacetate 2-cyclopentylideneacetic acid methyl ester methyl 2-cyclopentylideneethanoate 40203-73-4 Acetic acid, cyclopentylidene-, methyl ester Cyclopentylideneacetic acid, methyl ester EINECS 254-837-3 Methyl cyclopentylideneacetate
COC(=O)c1ccccc1NC=O		methyl 2-formamidobenzoate 2-formamidobenzoic acid methyl ester 41270-80-8 Benzoic acid, 2-(formylamino)-, methyl ester EINECS 255-287-7 Methyl 2-(formylamino)benzoate Methyl 2-formylaminobenzoate Methyl N-formylanthranilate	41270-80-8
COC(=O)C(C)O	Methyl 2-hydroxypropanoate	Methyl 2-hydroxypropanoate 2-Hydroxypropanoic acid methyl ester 2-hydroxypropionic acid methyl ester 17392-83-5 2155-30-8 547-64-8 Propanoic acid, 2-hydroxy-, methyl ester, (R)- Lactic acid, methyl ester, (.+/-.)- Propanoic acid, 2-hydroxy-, methyl ester, (.+/-.)- NCIOpen2_003771 EINECS 241-420-6 Methyl (R)-lactate Propanoic acid, 2-hydroxy-, methyl ester (+-)-Methyl 2-hydroxypropanoate (+-)-Meth…	17392-83-5 2155-30-8 547-64-8
CNc1ccccc1C(=O)OC	methyl 2-methylaminobenzoate	methyl 2-methylaminobenzoate 2-methylaminobenzoic acid methyl ester 85-91-6 ZINC00157414 4-14-00-01016 (Beilstein Handbook Reference) AI3-03340 BRN 0607217 CCRIS 2846 Dimethyl anthranilate (natural) EINECS 201-642-6 FEMA No. 2718 HSDB 2784 Methyl 2-(methylamino)benzoate Methyl-N-methylanthranilate NSC 9406 MLS000515990 SMR000112458 2-Methylaminomethyl benzoate Anthranilic acid, N-methyl-, methyl …	85-91-6
CCC(C)C(=O)OC		METHYL 2-METHYLBUTANOATE 2-methylbutanoic acid methyl ester 2-methylbutyric acid methyl ester 53955-81-0 868-57-5 AI3-34461 Butanoic acid, 2-methyl-, methyl ester Butyric acid, 2-methyl-, methyl ester EINECS 212-778-0 FEMA No. 2719 Methyl 2-methylbutyrate Methyl 2-methylbutyrate (natural) Methyl alpha-methylbutanoate Methyl alpha-methylbutyrate Butanoic acid, 2-methyl-, methyl ester, ( )- 277452_…	53955-81-0 868-57-5
CC(=C)C(=O)OC	methyl 2-methylprop-2-enoate	methyl 2-methylprop-2-enoate 2-methylprop-2-enoic acid methyl ester 2-methylacrylic acid methyl ester 9065-11-6 80-62-6 162221-54-7 220713-32-6 64200_FLUKA M55909_ALDRICH NCGC00091089-01 InChI=1/C5H8O2/c1-4(2)5(6)7-3/h1H2,2-3H PROPENOIC ACID,2-METHYL,METHYLESTER (METHACRYLATE METHYLESTER) methyl 2-methylacrylate C14527 2-(Methoxycarbonyl)-1-propene 2-Methyl-2-propenoic acid methyl ester 4-02-00-0…	9065-11-6 80-62-6 162221-54-7 220713-32-6
COC(=O)CS	methyl 2-sulfanylacetate	methyl 2-sulfanylacetate 2-mercaptoacetic acid methyl ester methyl 2-sulfanylethanoate 2365-48-2 64807-90-5 4-03-00-00614 (Beilstein Handbook Reference) BRN 0506259 Acetic acid, mercapto-, methyl ester Methanethiol, methoxy- Methyl 2-mercaptoacetate Methyl mercaptoacetate Methyl thioglycolate NSC75117 Thioglycolic acid methyl ester Usaf ek-7119 WLN: SH1VO1 Thioglykolsaeure-methylester [German] EI…
COC(=O)CC(C)C		Methyl 3-methylbutanoate 3-methylbutanoic acid methyl ester 3-methylbutyric acid methyl ester 556-24-1 BRN 1699922 Butanoic acid, 3-methyl-, methyl ester EINECS 209-117-3 FEMA No. 2753 Isovaleric acid, methyl ester METHYL (3-METHYL)BUTANOATE Methyl 3-methylbutyrate Methyl isopentanoate Methyl isovalerate Methyl isovalerate (natural) Methyl isovalerate [UN2400] [Flammable liquid] Methyl isovaleria…
COC(=O)CCc1ccccc1		Methyl 3-phenylpropanoate 3-phenylpropanoic acid methyl ester 3-phenylpropionic acid methyl ester 103-25-3 ST5407904 .beta.-Phenylpropionic acid methyl ester ZINC00396313 Hydrocinnamic acid, methyl ester Methyl .beta.-phenylpropionate Methyl 3-phenylpropionate Methyl hydrocinnamate NSC10128 NSC404188 Benzenepropanoic acid, methyl ester W274100_ALDRICH AI3-02453 EINECS 203-092-2 FEMA No. 2741 Hydr…	103-25-3
COC(=O)CCC(=O)CN	methyl 5-amino-4-oxopentanoate	methyl 5-amino-4-oxopentanoate methyl 5-amino-4-oxo-pentanoate 5-Amino-4-oxopentanoic acid methyl ester 5-amino-4-keto-valeric acid methyl ester 33320-16-0 Pentanoic acid, 5-amino-4-oxo-, methyl ester Aminolevulinic acid methyl ester Levulinic acid, 5-amino-, methyl ester Metvix
CCCC(=O)OC	Methyl butanoate	Methyl butanoate butanoic acid methyl ester butyric acid methyl ester 623-42-7 ZINC00404765 19358_FLUKA 246093_ALDRICH W269328_ALDRICH InChI=1/C5H10O2/c1-3-4-5(6)7-2/h3-4H2,1-2H Butanoic acid, methyl ester Butyric acid, methyl ester Methyl butyrate Methyl n-butyrate NSC9380 WLN: 3VO1 W269301_ALDRICH 2-Methyl butyric acid 4-02-00-00786 (Beilstein Handbook Reference) AI3-06009 BRN 1740743 EINECS 21…	623-42-7
COC(=O)c1ccco1	methyl furan-2-carboxylate	methyl furan-2-carboxylate 2-furancarboxylic acid methyl ester furan-2-carboxylic acid methyl ester 611-13-2 AIDS-018154 AIDS018154 48050_FLUKA ZINC00388192 129852_ALDRICH Furoic acid, methyl ester W270318_ALDRICH 2-Furancarboxylic acid, methyl ester 2-Furoic acid methyl ester 2-Furoic acid, methyl ester Methyl 2-furancarboxylate Methyl 2-furoate Methyl furoate Methyl pyromucate NSC35551 Pyromuci…	611-13-2
CCCCCCC(=O)OC	METHYL HEPTANOATE	METHYL HEPTANOATE heptanoic acid methyl ester enanthic acid methyl ester 106-73-0 AI3-33581 BRN 1747147 EINECS 203-428-8 FEMA No. 2705 Heptanoic acid, methyl ester Methyl enanthate Methyl heptoate Methyl heptylate Methyl heptylate (natural) Methyl n-heptylate Methyl oenanthylate 75218_FLUKA W270504_ALDRICH 46227_RIEDEL 149004_ALDRICH ZINC02041110 W270512_ALDRICH 75220_FLUKA	106-73-0
CCCCCC=CCC(=O)OC	Methyl non-3-enoate methyl (E)-non-3-enoate	Methyl non-3-enoate methyl (E)-non-3-enoate (E)-non-3-enoic acid methyl ester non-3-enoic acid methyl ester 13481-87-3 36781-67-6 ZINC01850695 W371009_ALDRICH 3-Nonenoic acid, methyl ester EINECS 236-786-9 FEMA No. 3710 Methyl 3-nonenoate	13481-87-3 36781-67-6
CCCCCC=CCC=CCCCCCCCC(=O)OC		Methyl octadeca-9,12-dienoate Methyl (9E,12E)-octadeca-9,12-dienoate (9E,12E)-octadeca-9,12-dienoic acid methyl ester octadeca-9,12-dienoic acid methyl ester 2566-97-4 2462-85-3 11068-03-4 9,12-OCTADECADIENOIC ACID (Z,Z)-, METHYL ESTER, HYDROPEROXIDE 9,12-Octadecadienoic acid (9Z,12Z)-, methyl ester, hydroperoxide Methyl linoleate hydroperoxide EINECS 219-560-4 L2251_SIGMA 62155_FLUKA Linolelaidi…	2566-97-4 2462-85-3 11068-03-4
CCCCC(=O)OC	Methyl pentanoate	Methyl pentanoate pentanoic acid methyl ester valeric acid methyl ester 624-24-8 148997_ALDRICH 46242_RIEDEL 94562_FLUKA W275204_ALDRICH ZINC02034321 94560_FLUKA InChI=1/C6H12O2/c1-3-4-5-6(7)8-2/h3-5H2,1-2H 4-02-00-00871 (Beilstein Handbook Reference) BRN 1741905 EINECS 210-838-0 FEMA No. 2752 METHYL VALERATE Methyl n-valerate Methyl valerianate Pentanoic acid, methyl ester Valeric acid, methyl e…
COC(=O)CCCCCCCCC=C	Methyl undec-10-enoate	Methyl undec-10-enoate undec-10-enoic acid methyl ester 25339-67-7 111-81-9 EINECS 203-910-8 NSC 1273 NCGC00166231-01 10-Undecenoic acid methyl ester 115126_ALDRICH Undecylenic acid methyl ester ST5409672 W425301_ALDRICH U8502_SIGMA 10-Undecenoic acid, methyl ester Methyl 10-undecenate Methyl 10-undecenoate Methyl undecenate Methyl undecenoate NSC1273 Undecenoic acid, methyl ester Undecylenic aci…	25339-67-7 111-81-9
C[Si](O[Si](C)(O[Si](C)(c1ccccc1)c1ccccc1)c1ccccc1)(O[Si](C)(c1ccccc1)c1ccccc1)c1ccccc1		methyl-(methyl-di(phenyl)silyl)oxy-[methyl-(methyl-di(phenyl)silyl)oxy-phenylsilyl]oxy-phenylsilane methyl-(methyl-di(phenyl)silyl)oxy-[methyl-(methyl-di(phenyl)silyl)oxy-phenyl-silyl]oxy-phenyl-silane 38421-40-8 1,3,5,7-TETRAMETHYL-1,1,3,5,7,7-HEXAPHENYLTETR* 1,3,5,7-Tetramethyl-1,1,3,5,7,7-hexaphenyltetrasiloxane EINECS 253-922-2 Tetrasiloxane, 1,3,5,7-tetramethyl-1,1,3,5,7,7-hexaphenyl-
Cc1ccccc1	methylbenzene	methylbenzene 3101-08-4 50643-04-4 108-88-3 TOLUENE antisal 1a methacide methylbenzol monomethyl benzene phenyl methane tolu-sol toluol 314358_SIGMA Toluene-(ring-UL-14C) Toluolo [Italian] Benzene, methyl 89677_FLUKA UN 1294 UN1294 89680_FLUKA 89681_FLUKA WLN: 1R 34866_SIAL 155004_SIAL MBN C01455 179965_ALDRICH 32249_RIEDEL NSC406333 Toluene [UN1294] [Flammable liquid] Tolueen Otoline 322245_SIGM…	3101-08-4 50643-04-4 108-88-3
C[Si](O[Si](C)(c1ccccc1)c1ccccc1)(O[Si](C)(c1ccccc1)c1ccccc1)c1ccccc1	methyl-bis[(methyl-di(phenyl)silyl)oxy]-phenylsilane	methyl-bis[(methyl-di(phenyl)silyl)oxy]-phenylsilane methyl-bis[(methyl-di(phenyl)silyl)oxy]-phenyl-silane 3390-61-2 1,3,5-Trimethyl-1,1,3,5,5-pentaphenyltrisiloxane EINECS 222-222-9 Trisiloxane, 1,3,5-trimethyl-1,1,3,5,5-pentaphenyl-	3390-61-2
CCCCCCCC[Si](C)(O[Si](C)(C)C)O[Si](C)(C)C	methyl-octyl-bis(trimethylsilyloxy)silane	methyl-octyl-bis(trimethylsilyloxy)silane 17955-88-3 1,1,1,3,5,5,5-Heptamethyl-3-octyltrisiloxane EINECS 241-881-3 Trisiloxane, 1,1,1,3,5,5,5-heptamethyl-3-octyl-	17955-88-3
CC(C)(C)CC(C)(C)NC(=O)C=C		N-(2,4,4-trimethylpentan-2-yl)prop-2-enamide N-(1,1,3,3-tetramethylbutyl)prop-2-enamide N-(1,1,3,3-Tetramethylbutyl)acrylamide 4223-03-4 2-Propenamide, N-(1,1,3,3-tetramethylbutyl)- Acrylamide, N-(1,1,3,3-tetramethylbutyl)- N-tert-Octylacrylamide NSC9035 tert-Octylacrylamide	4223-03-4
CC(=O)NCCO	N-(2-Hydroxyethyl)acetamide	N-(2-Hydroxyethyl)acetamide N-(2-hydroxyethyl)ethanamide 142-26-7 FR-0645 4-04-00-01535 (Beilstein Handbook Reference) ACETYLETHANOLAMINE AI3-02836 Acetamide MEA Acetic acid amide, N-(2-hydroxyethyl)- BRN 1811708 EINECS 205-530-8 HSDB 2713 Hydroxyethyl acetamide N-Acetyl ethanolamine N-beta-Hydroxyethylacetamide NSC 5999 beta-Hydroxyethylacetamide SBB007954 100455_ALDRICH .beta.-Hydroxyethylaceta…	142-26-7
CCCCCC=CCC=CCCCCCCCC(=O)NCCO	N-(2-hydroxyethyl)octadeca-9,12-dienamide (9E,12E)-N-(2-hydroxyethyl)octadeca-9,12-dienamide	N-(2-hydroxyethyl)octadeca-9,12-dienamide (9E,12E)-N-(2-hydroxyethyl)octadeca-9,12-dienamide CBiol_001716 Bio1_000491 KBio3_000497 KBio3_000498 KBio2_000249 KBio2_002817 KBio2_005385 KBioGR_000249 Bio2_000729 Bio2_000249 KBioSS_000249 Bio1_000980 Bio1_000002
CCCCCCCC(=O)NCCO	N-(2-hydroxyethyl)octanamide	N-(2-hydroxyethyl)octanamide N-(2-hydroxyethyl)caprylamide 69227-24-3 Amides, C8-18 and C18-unsatd, N-(hydroxyethyl) C8-C18 And C18 unsaturated alkylcarboxylic acid amide monoethanol EINECS 273-927-3 SDA 01-022-00 Caprylic acid monoethanol amide Octanamide, N-(2-hydroxyethyl)-	69227-24-3
C=CCCCCCCCCC(=O)NCCO	N-(2-Hydroxyethyl)undec-10-enamide	N-(2-Hydroxyethyl)undec-10-enamide 20545-92-0 25377-63-3 51000-85-2 10-Undecenamide, N-(2-hydroxyethyl)- EINECS 243-870-9 N-(2-Hydroxyethyl)undecenamide N-(2-Hydroxyethyl)undecylenamide Undecenamide, N-(2-hydroxyethyl)- Undecylenamide MEA Undecylenic acid monoethanolamide Undecylenoyl monoethanolamide	20545-92-0 25377-63-3 51000-85-2
NCCCCNCCCN	N-(3-aminopropyl)butane-1,4-diamine	N-(3-aminopropyl)butane-1,4-diamine 4-aminobutyl-(3-aminopropyl)amine 124-20-9 BPBio1_001276 1,4-Diaminobutane, N-(3-aminopropyl)- Spectrum3_000977 1,4-Butanediamine, N-(3-aminopropyl)- IDI1_001007 124-20-9 (FREE BASE) 1,8-Diamino-4-azaoctane 85558_FLUKA N-(3-Aminopropyl)-1,4-diaminobutane 1,5,10-Triazadecane 4-04-00-01300 (Beilstein Handbook Reference) 4-Azaoctamethylenediamine AI3-26636 BRN 169…	124-20-9
CCCCCCCCCCCCN(CCCN)CCCN		N-(3-Aminopropyl)-N-dodecylpropane-1,3-diamine N-(3-aminopropyl)-N-dodecyl-propane-1,3-diamine bis(3-aminopropyl)-lauryl-amine 2372-82-9 AIDS-006135 AIDS006135 Lonzabec-12 N-(3-Aminopropyl)-N-dodecyl-1,3-propanediamine 1,3-Propanediamine, N-(3-aminopropyl)-N-dodecyl 1,3-Propanediamine, N-(3-aminopropyl)-N-dodecyl- Bis(aminopropyl)laurylamine EINECS 219-145-8 Laurylamine dipropylenediamine
NCCCNCCCN		N-(3-aminopropyl)propane-1,3-diamine Bis(3-aminopropyl)amine 56-18-8 3,3'-azanediyldi(propanamine) CHEBI:16841 3,3'-Iminodi(propylamine) 3,3'-Iminodipropylamine [UN2269] [Corrosive] 3,3-Diaminodipropylamine 4-04-00-01278 (Beilstein Handbook Reference) AI3-25361 BRN 1071254 Bis-(3-aminopropyl)amine CCRIS 4826 Dipropylenetriamine (VAN) Dipropylentriamin [German] EINECS 200-261-2 IMINOBIS(3-PROPYLAM…	56-18-8
CC(C)CCCCCCCCCCCCCCC(=O)NCCCN(C)C	N-(3-dimethylaminopropyl)-16-methylheptadecanamide	N-(3-dimethylaminopropyl)-16-methylheptadecanamide N-(3-dimethylaminopropyl)-16-methyl-heptadecanamide 67799-04-6 N-(3-(Dimethylamino)propyl)isooctadecan-1-amide N-(3-(Dimethylamino)propyl)isooctadecanamide EINECS 267-101-1 Isooctadecanamide, N-(3-(dimethylamino)propyl)- Isostearamidopropyl dimethylamine
CCCCCCCCCCCCCC(=O)NCCCN(C)C	N-(3-dimethylaminopropyl)tetradecanamide	N-(3-dimethylaminopropyl)tetradecanamide N-(3-dimethylaminopropyl)myristamide 45267-19-4 Dimethylaminopropyl myristamide EINECS 256-214-1 Myristamidopropyl dimethylamine Myristic 3-dimethylaminopropylamide N,N-Dimethyl-(3-tetradecylamidopropyl)amine N-(3-(Dimethylamino)propyl)myristamide N-(3-(Dimethylamino)propyl)tetradecanamide Tetradecanamide, N-(3-(dimethylamino)propyl)- ST5433829	45267-19-4
CCOCCCNC(=O)C(O)C(C)(C)CO		N-(3-ethoxypropyl)-2,4-dihydroxy-3,3-dimethylbutanamide N-(3-ethoxypropyl)-2,4-dihydroxy-3,3-dimethyl-butanamide N-(3-ethoxypropyl)-2,4-dihydroxy-3,3-dimethyl-butyramide
CC(=O)Nc1ccc(cc1)OCC	N-(4-Ethoxyphenyl)acetamide	N-(4-Ethoxyphenyl)acetamide N-(4-ethoxyphenyl)ethanamide 62-44-2 KBio2_003830 314005_SIGMA BSPBio_003048 Phenacetin-ring-UL-14C Tetracydin Spectrum5_001902 4&#8242;-Ethoxyacetanilide-ring-UL-14C BSPBio_000545 Prestwick3_000533 N-[4-(ethyloxy)phenyl]acetamide KBioGR_001089 SPBio_001979 Prestwick2_000533 RCRA waste no. U187 235830_ALDRICH 4&#8242;-Ethoxyacetanilide Sinutabs Spectrum_000782 RCRA was…
CC(=O)Nc1ccc(O)cc1	N-(4-Hydroxyphenyl)acetamide	N-(4-Hydroxyphenyl)acetamide N-(4-hydroxyphenyl)ethanamide 8055-08-1 103-90-2 Tazamol Termacet Termalgin Termalgine Termofren Tiffy Titralgan Toximer P Treupel N Treupel mon Treuphadol Triaminic Sore Throat Formula Tricoton Tylex Tylex CD Tylol Tymol Upsanol Utragin Veralgina Vermidon Verpol Viclor Richet Vips Viruflu Vivimed Volpan Zatinol Zolben p-Acetylaminophenol A3035_SIAL BSPBio_001786 N-(4…	8055-08-1 103-90-2
CNC(=O)C(C)(C(C)C)C(C)C	N,2,3-trimethyl-2-propan-2-ylbutanamide	N,2,3-trimethyl-2-propan-2-ylbutanamide 2-isopropyl-N,2,3-trimethyl-butanamide 2-Isopropyl-N,2,3-trimethylbutanamide 2-isopropyl-N,2,3-trimethyl-butyramide N,2,3-trimethyl-2-propan-2-yl-butanamide 51115-67-4 2-Isopropyl-N,2,3-trimethylbutyramide Butanamide, N,2,3-trimethyl-2-(1-methylethyl)- EINECS 256-974-4 Methyl diisopropyl propionamide N,2,3-Trimethyl-2-(1-methylethyl)butanamide N,2,3-Trimeth…	51115-67-4
CN(C(=O)C(C)CC)c1ccccc1	N,2-dimethyl-N-phenylbutanamide	N,2-dimethyl-N-phenylbutanamide N,2-dimethyl-N-phenyl-butanamide N,2-dimethyl-N-phenyl-butyramide 84434-18-4 Butanamide, N,2-dimethyl-N-phenyl- EINECS 282-817-4 N,2-Dimethyl-N-phenylbutyramide N-Methyl-N-phenyl-2-methylbutyramide	84434-18-4
NCCCNCCCCNCCCN	N,N'-bis(3-aminopropyl)butane-1,4-diamine	N,N'-bis(3-aminopropyl)butane-1,4-diamine 3-aminopropyl-[4-(3-aminopropylamino)butyl]amine 115-04-8 71-44-3 Biomol-NT_000213 306-67-2 (TETRAHYDROCHLORIDE) 71-44-3 (FREE BASE) AIDS-005222 AIDS005222 NSC268508 (FREE BASE) NSC69852 (TETRAHYDROCHLORIDE) S3256_SIGMA 85588_FLUKA N,N'-Bis(3-aminopropyl)-1,4-butane-diamine SPERMINE diaminopropyl-tetramethylenediamine gerontine musculamine neuridine NCI60…	115-04-8 71-44-3
CCCCCCCCCCCC(=O)NC(CCC(=O)NCCCC)C(=O)NCCCC	N,N'-dibutyl-2-(dodecanoylamino)pentanediamide	N,N'-dibutyl-2-(dodecanoylamino)pentanediamide N,N'-dibutyl-2-(1-oxododecylamino)pentanediamide N,N'-dibutyl-2-(lauroylamino)glutaramide
C[N+]1c2ccccc2C(C)(C)C=1C=Cc1ccc(cc1)N(CC)CC	N,N-diethyl-4-[(E)-2-(1,3,3-trimethylindol-1-ium-2-yl)ethenyl]aniline N,N-diethyl-4-[2-(1,3,3-trimethylindol-1-ium-2-yl)ethenyl]aniline	N,N-diethyl-4-[(E)-2-(1,3,3-trimethylindol-1-ium-2-yl)ethenyl]aniline N,N-diethyl-4-[2-(1,3,3-trimethylindol-1-ium-2-yl)ethenyl]aniline N,N-diethyl-4-[2-(1,3,3-trimethylindol-1-ium-2-yl)vinyl]aniline N,N-diethyl-4-[(E)-2-(1,3,3-trimethylindol-1-ium-2-yl)vinyl]aniline N,N-diethyl-4-[2-(1,3,3-trimethyl-2-indol-1-iumyl)vinyl]aniline N,N-diethyl-4-[(E)-2-(1,3,3-trimethyl-2-indol-1-iumyl)vinyl]aniline…
CCCCCCCC(=O)N(CC)CC	N,N-Diethyloctanamide	N,N-Diethyloctanamide N,N-diethylcaprylamide 996-97-4 AI3-31056 EINECS 213-639-7 NSC 3916 Caprylic acid diethylamide N,N-Diethyloctamide N,N-Diethyloctylamide NSC3916 Octanamide, N,N-diethyl-
CCCCCCCCCCCCCCCCCC(=O)NCCC[N+](C)(C)[O-]	N,N-dimethyl-3-(octadecanoylamino)propan-1-amine oxide	N,N-dimethyl-3-(octadecanoylamino)propan-1-amine oxide N,N-dimethyl-3-(1-oxooctadecylamino)propan-1-amine oxide N,N-dimethyl-3-stearamido-propan-1-amine oxide 25066-20-0 372973-82-5 Octadecanamide, N-(3-(dimethyloxidoamino)propyl)- Stearamidopropylamine oxide Stearylamidopropyl-N,N-dimethylamine, oxide Amides, stearic, N-(3-(dimethylamino)propyl), N-oxide EINECS 246-598-9 N-(3-(Dimethylamino)prop…	25066-20-0 372973-82-5
CCCCCCCCCCCCCC(=O)NCCC[N+](C)(C)[O-]	N,N-dimethyl-3-(tetradecanoylamino)propan-1-amine oxide	N,N-dimethyl-3-(tetradecanoylamino)propan-1-amine oxide N,N-dimethyl-3-(1-oxotetradecylamino)propan-1-amine oxide 67806-10-4 Myristamidopropylamine oxide Myristylamidopropyl-N,N-dimethylamine, oxide N-(3-(Dimethylamino)propyl)myristamide N-oxide N-(3-(Dimethylamino)propyl)tetradecanamide-N-oxide Tetradecanamide, N-(3-(dimethylamino)propyl)-, N-oxide Tetradecanamide, N-(3-(dimethyloxidoamino)propy…	67806-10-4
CCCCCCCCCC[N+](C)(C)[O-]	N,N-dimethyldecan-1-amine oxide	N,N-dimethyldecan-1-amine oxide 2605-79-0 40105_FLUKA N,N-Dimethyldecylamine-N-oxide solution DECYLAMINE-N,N-DIMETHYL-N-OXIDE N,N-Dimethyldecylamine-N-oxide 40103_FLUKA 1-Decanamine, N,N-dimethyl-, N-oxide Capric dimethyl amine oxide Decyl dimethyl amine oxide Decylamine oxide EINECS 220-020-5 N,N-Dimethyl-1-decanamine-N-oxide N,N-Dimethyldecylamine N-oxide N,N-Dimethyldecylamine oxide Alkyldimet…	2605-79-0
C[N+](C)(C)[O-]	N,N-dimethylmethanamine oxide	N,N-dimethylmethanamine oxide 1184-78-7 317594_ALDRICH ZINC00895494 TRIMENTHLAMINE-N-O trimethylamine-N-oxide N,N-dimethylmethanamine oxide (IUPAC) c1219 AI3-60110 EINECS 214-675-6 Methanamine, N,N-dimethyl-, N-oxide N,N-Dimethylmethanamine N-oxide NSC 408426 Trimethylamine, N-oxide (8CI) Trimethyloxamine Triox NSC408426 TMAO Trimethylamine oxide Trimethylamine, N-oxide (CH3)3NO C01104 Trimethyla…
COc1cc(CNC(=O)CCCCC=CC(C)C)ccc1O	N-[(4-hydroxy-3-methoxyphenyl)methyl]-8-methylnon-6-enamide (E)-N-[(4-hydroxy-3-methoxyphenyl)methyl]-8-methylnon-6-enamide	N-[(4-hydroxy-3-methoxyphenyl)methyl]-8-methylnon-6-enamide (E)-N-[(4-hydroxy-3-methoxyphenyl)methyl]-8-methylnon-6-enamide N-[(4-hydroxy-3-methoxy-phenyl)methyl]-8-methyl-non-6-enamide (E)-N-[(4-hydroxy-3-methoxy-phenyl)methyl]-8-methyl-non-6-enamide N-(4-hydroxy-3-methoxy-benzyl)-8-methyl-non-6-enamide (E)-N-(4-hydroxy-3-methoxy-benzyl)-8-methyl-non-6-enamide 404-86-4 UPCMLD-DP092:002 NINDS_000…	404-86-4
CCCCCCCCC=CCCCCCCCC(=O)NCCNC(=O)CCCCCCCC=CCCCCCCCC	N-[2-(octadec-9-enoylamino)ethyl]octadec-9-enamide (E)-N-[2-[[(E)-octadec-9-enoyl]amino]ethyl]octadec-9-enamide	N-[2-(octadec-9-enoylamino)ethyl]octadec-9-enamide (E)-N-[2-[[(E)-octadec-9-enoyl]amino]ethyl]octadec-9-enamide N-[2-(1-oxooctadec-9-enylamino)ethyl]octadec-9-enamide (E)-N-[2-[[(E)-1-oxooctadec-9-enyl]amino]ethyl]octadec-9-enamide N,N'-Ethylenebisoleamide (oleic acid-ethylenediamine condensate), amine/acid ratio = 1/2 NSC131419 Oleamide, N,N'-ethylenebis-
CCCCCCCCCCCCNCCCN	N-Dodecylpropane-1,3-diamine	N-Dodecylpropane-1,3-diamine 3-aminopropyl-lauryl-amine 52907-39-8 5538-95-4 EINECS 226-902-6 NSC40165 1,3-Propanediamine, N-dodecyl- Diam 21 Laurylaminopropylamine N-(3-Aminopropyl)dodecylamine N-Dodecyl-1,3-propanediamine N-Dodecyltrimethylenediamine N-Lauryl-1,3-diaminopropane N-Lauryl-1,3-propanediamine N-Lauryltrimethylenediamine NSC30892 RC 5635 NSC 40165	52907-39-8 5538-95-4
CNC(=O)c1ccccc1SSc1ccccc1C(=O)NC	N-methyl-2-[2-(methylcarbamoyl)phenyl]disulfanylbenzamide	N-methyl-2-[2-(methylcarbamoyl)phenyl]disulfanylbenzamide N-methyl-2-[2-(methylcarbamoyl)phenyl]disulfanyl-benzamide 2527-58-4 2,2'-Dithiobis[N-(methyl)benzamide] AIDS-044678 AIDS044678 2,2'-Dithiobis(N-methylbenzamide) Benzamide, 2,2'-dithiobis(N-methyl- EINECS 219-768-5	2527-58-4
CNc1ccccc1N	N-Methylbenzene-1,2-diamine	N-Methylbenzene-1,2-diamine (2-aminophenyl)-methyl-amine 4760-34-3 4-13-00-00041 (Beilstein Handbook Reference) ST5433903 1,2-Benzenediamine, N-methyl- 2-(Methylamino)aniline 2-Amino-N-methylaniline N-Methyl-1,2-phenylenediamine BRN 0636586 EINECS 225-297-6 N-Methyl-o-phenylenediamine o-Phenylenediamine, N-methyl- 398985_ALDRICH ZINC00395550
CCCCCCC(O)C=C		non-1-en-3-ol 21964-44-3 79605-61-1 1-Vinylheptanol Hexyl vinyl carbinol NSC 102782 1-Nonen-3-ol EINECS 244-686-1 Hexylvinylcarbinol NSC102782
CCCCCCC=CC=O	Non-2-enal (E)-Non-2-enal	Non-2-enal (E)-Non-2-enal 18829-56-6 30551-15-6 LMFA06000041 SBB006609 Nonenal (E)-2-Nonenal 3-Hexyl-2-propenal 3-Hexylacrolein AI3-36268 CCRIS 3326 EINECS 219-562-5 FEMA No. 3213 Heptylideneacetaldehyde NSC 20746 alpha-Nonenyl aldehyde beta-Hexylacrolein trans-2-Nonenal (natural) W321303_ALDRICH 255653_ALDRICH 2-Nonenal, (2E)- 2-Nonenal, (E)- 4-01-00-03502 (Beilstein Handbook Reference) BRN 1722…	18829-56-6 30551-15-6
CC(=O)Nc1ccccc1	N-Phenylacetamide	N-Phenylacetamide 103-84-4 Spectrum2_001434 AH-034/32461060 Acetamide, N-phenyl- Acetamidobenzene Acetanil Acetanilid Acetic acid anilide Acetoanilide Acetylaminobenzene Acetylaniline Aniline, N-acetyl- Antifebrin Benzenamine, N-acetyl- N-Acetylaniline NSC7636 Phenalgene Phenalgin Usaf ek-3 WLN: 1VMR SPBio_001568 Spectrum5_000989 KBio3_001970 Acetanilide C07565 KBio2_003226 ST040202 KBio2_000658 …	103-84-4
Nc1ccc(cc1)Nc1ccccc1		N-phenylbenzene-1,4-diamine (4-aminophenyl)-phenyl-amine 12227-74-6 101-54-2 NSC 3401 Rodol Gray B base p-Aminodifenylamin [Czech] 1,4-Benzenediamine, N-phenyl- 4-Aminodiphenylamine Acna Black DF Base Azosalt R C.I. 37240 C.I. 76085 C.I. Azoic Diazo Component 22 C.I. Developer 15 C.I. Oxidation Base 2 Diphenyl Black Diphenylamine, 4-amino- Diphenylamine, p-amino- Fast Blue R Salt Luxan Black R N-…
COc1cc2c(cc1OC)N1C3C4C(CC1=O)OCC=C1CN5CCC23C5CC14		NSC123398 Strychnidin-10-one, 2,3-dimethoxy- SBB006454 Isobrucine
CCCCCC(O)C=C		Oct-1-en-3-ol 50999-79-6 3391-86-4 O5284_ALDRICH Vinyl amyl carbinol WLN: QY5&1U1 mushroom alcohol octene-1-ol-3 vinyl hexanol 1-Octen-3-ol 3-Hydroxy-1-octene Amyl vinyl carbinol 1-Octen-3-ol (natural) NSC87563 3-Octenol AI3-28627 Amylvinylcarbinol BRN 1744110 EINECS 222-226-0 EPA Pesticide Chemical Code 069037 FEMA No. 2805 Matsuica alcohol Matsutake alcohol [Japanese] NSC 87563 Oct-1-ene-3-ol P…	50999-79-6 3391-86-4
CCC=CCC=CCC=CCCCCCCCC(O)=O	Octadeca-9,12,15-trienoic acid (9E,12E,15E)-octadeca-9,12,15-trienoic acid	Octadeca-9,12,15-trienoic acid (9E,12E,15E)-octadeca-9,12,15-trienoic acid 1955-33-5 463-40-1 28290-79-1 85392-75-2 Bio1_000727 LINOLENIC_ACID linolenate linolenic acid Bio2_000576 BB_NC-0378 EINECS 217-792-0 delta9,12,15-Octadecatrienoic acid Bio2_000096 (E,E,E)-9,12,15-Octadecatrienoic acid 9,12,15-Octadecatrienoic acid, (E,E,E)- 9E,12E,15E-octadecatrienoic acid Elaidolinoleic acid LMFA01030153…	1955-33-5 463-40-1 28290-79-1 85392-75-2
CCCCCC=CCC=CCCCCCCCC(O)=O	octadeca-9,12-dienoic acid (9E,12E)-octadeca-9,12-dienoic acid	octadeca-9,12-dienoic acid (9E,12E)-octadeca-9,12-dienoic acid trans-9,trans-12-Linoleic acid Bio1_001258 Bio1_000280 Bio2_000094 9,12-Linoleic acid 9,12-Octadecadienoic acid 9,12-Octadecadienoic acid (Z,Z)- 9,12-Octadecadienoic acid, (Z)- 9,12-Octadecadienoic acid, (Z,Z)- Emersol 310 Emersol 315 Grape seed oil Leinoleic acid Linoleic Linolic acid NSC281243 Polylin No. 515 Telfairic acid Unifac 6…
Cc1cc(ccc1)N(C)C(=S)Oc1cc2ccccc2cc1	O-naphthalen-2-yl [methyl-(3-methylphenyl)amino]methanethioate	O-naphthalen-2-yl [methyl-(3-methylphenyl)amino]methanethioate O-(2-naphthyl) [methyl-(3-methylphenyl)amino]methanethioate [methyl-(3-methylphenyl)amino]methanethioic acid O-(2-naphthyl) ester 94256-64-1 2398-96-1 Tolnaftate [USAN:BAN:INN:JAN] Tolnaftato [DCIT] Tolnaftato [INN-Spanish] Tolnaftatum [INN-Latin] Tolnaphthate Tritin m,N-Dimethylthiocarbanilic acid O-2-naphthyl ester T6638_SIGMA Prest…	94256-64-1 2398-96-1
O=C1CCCC2C3CCCN4CCCC(CN12)C43		Oprea1_680866 SMR000011610 MLS000029265 Dodecahydro-3a,7a-diaza-benzo[de]anthracen-8-one Isomatrine NSC318810 6.beta.,7.beta.-Matrine NEW BASE STRUCTURE NSC143088 Oprea1_860679 Isosophoridine BAS 02913238 Matridin-15-one
CCC(O)C=C	pent-1-en-3-ol	pent-1-en-3-ol 616-25-1 67928-92-1 77010_FLUKA 1-Penten-3-ol 1-Pentene-3-ol Ethyl vinyl carbinol NSC65446 1-Ethylallyl alcohol AI3-28606 EINECS 210-472-1 FEMA No. 3584 NSC 65446 Vinyl ethyl carbinol alpha-Ethylallyl alcohol P8602_ALDRICH 1-penten-3-ol (E) W358401_ALDRICH
CCC(=O)CC	pentan-3-one	pentan-3-one 96-22-0 345121_ALDRICH 02471_FLUKA 127604_ALDRICH LMFA12000001 W510106_ALDRICH NCGC00166068-01 DIETHYLKETONE InChI=1/C5H10O/c1-3-5(6)4-2/h3-4H2,1-2H AI3-24337 Diethyl ketone [UN1156] [Flammable liquid] Diethylcetone [French] EINECS 202-490-3 Ethyl propionyl HSDB 5301 NSC 8653 UN1156 ZINC01648158 270334_ALDRICH 3-Pentanone DEK Diethyl ketone Diethylcetone Dimethylacetone Ethyl ketone …	96-22-0
CCCCC=O	Pentanal	Pentanal Valeraldehyde 110-62-3 PNO ZINC01667603 W309818_ALDRICH PTL Amylaldehyde Butyl formal NSC35404 Valeral Valerianic aldehyde Valeric acid aldehyde Valeric aldehyde Valeryl aldehyde WLN: VH4 n-Pentanal n-Valeraldehyde InChI=1/C5H10O/c1-2-3-4-5-6/h5H,2-4H2,1H 94512_FLUKA NCGC00091722-01 4-01-00-03268 (Beilstein Handbook Reference) AI3-16105 Amyl aldehyde BRN 1616304 CCRIS 3220 EINECS 203-784…
CCCCCOC(=O)C(C)C		pentyl 2-methylpropanoate 2-methylpropanoic acid pentyl ester 2-methylpropionic acid amyl ester 2445-72-9 AI3-06017 EINECS 219-494-6 Pentyl isobutyrate Propanoic acid, 2-methyl-, pentyl ester Isobutyric acid, pentyl ester	2445-72-9
CCCCCOC(=O)Cc1ccccc1	pentyl 2-phenylacetate	pentyl 2-phenylacetate 2-phenylacetic acid pentyl ester 2-phenylacetic acid amyl ester pentyl 2-phenylethanoate 5137-52-0 Amyl phenylacetate Amylphenyl acetate Benzeneacetic acid, pentyl ester NSC46135 Pentyl phenylacetate AI3-24154 Acetic acid, phenyl-, pentyl ester (8CI) EINECS 225-895-7 NSC 46135 n-Amyl phenylacetate Acetic acid, phenyl-, pentyl ester	5137-52-0
CCCCCOC(=O)CC(C)C	pentyl 3-methylbutanoate	pentyl 3-methylbutanoate 3-methylbutanoic acid pentyl ester 3-methylbutyric acid amyl ester 25415-62-7 NSC 46107 Pentyl isovalerate 76677_FLUKA AI3-33587 n-Amyl isovalerate 1-Pentyl isovalerate Amyl isovalerate Butanoic acid, 3-methyl-, pentyl ester Isovaleric acid, pentyl ester NSC46107 Pentyl 3-methylbutyrate EINECS 246-954-3 Isovaleric acid, pentyl ester (8CI)	25415-62-7
c1ccccc1Oc1ccccc1	Phenoxybenzene	Phenoxybenzene 101-84-8 32576-61-7 ZINC01504642 ST5214374 NCGC00091303-01 NCGC00091303-02 1,1'-Oxybis(benzene) 4-06-00-00568 (Beilstein Handbook Reference) AI3-00749 BRN 1364620 CCRIS 5912 Chemcryl JK-EB EINECS 202-981-2 Ether, diphenyl FEMA No. 3667 Geranium crystals HSDB 934 NSC 19311 Oxybisbenzene Oxydiphenyl Phenyl ether (8CI) Phenyl ether, vapor 1,1'-oxybisbenzene Diphenylaether CHEBI:39258 …	101-84-8 32576-61-7
CC(C)C(=O)OCc1ccccc1	Phenylmethyl 2-methylpropanoate	Phenylmethyl 2-methylpropanoate 2-methylpropanoic acid phenylmethyl ester 2-methylpropionic acid benzyl ester 103-28-6 ST5407931 NSC406201 AI3-02944 W214108_ALDRICH Benzyl 2-methylpropionate Benzyl isobutanoate Benzyl isobutyrate Isobutyric acid, benzyl ester NSC46112 Propanoic acid, 2-methyl-, phenylmethyl ester WLN: 1Y1 & VO1R 4-06-00-02266 (Beilstein Handbook Reference) ZINC01677783 BRN 186929…	103-28-6
CC(C)CC(=O)OCc1ccccc1		Phenylmethyl 3-methylbutanoate 3-methylbutanoic acid phenylmethyl ester 3-methylbutyric acid benzyl ester 103-38-8 Benzyl 3-methylbutanoate Benzyl 3-methylbutyrate Benzyl isovalerate Butanoic acid, 3-methyl-, phenylethyl ester Butanoic acid, 3-methyl-, phenylmethyl ester Isopentanoic acid, phenylmethyl ester Isopropyl acetic acid, benzyl ester Isovaleric acid, benzyl ester NSC46124 WLN: 1Y1&1VO1R…	103-38-8
O=C1CCC(N1)C(=O)OCc1ccccc1	phenylmethyl 5-oxopyrrolidine-2-carboxylate	phenylmethyl 5-oxopyrrolidine-2-carboxylate 5-oxo-2-pyrrolidinecarboxylic acid phenylmethyl ester 5-ketopyrrolidine-2-carboxylic acid benzyl ester 60555-57-9 T0510-5456 IDI1_007231 Benzyl 5-oxoprolinate MLS000564812 SMR000152026 Oprea1_130188 EINECS 262-291-2 Enamine_003588	60555-57-9
CC(=O)OCc1ccccc1	Phenylmethyl acetate	Phenylmethyl acetate acetic acid phenylmethyl ester acetic acid benzyl ester Phenylmethyl ethanoate 140-11-4 Benzyl acetate + glycine combination 50475_FLUKA NCGC00090779-02 W213500_ALDRICH NCGC00090779-01 Benzylester kyseliny octove [Czech] InChI=1/C9H10O2/c1-8(10)11-7-9-5-3-2-4-6-9/h2-6H,7H2,1H CCRIS 1423 Acetic acid, phenylmethyl ester AI3-01996 Benzyl acetate (natural) .alpha.-Acetoxytoluene …	140-11-4
CCCCC(=O)OCc1ccccc1	phenylmethyl pentanoate	phenylmethyl pentanoate pentanoic acid phenylmethyl ester valeric acid benzyl ester 10361-39-4 AI3-02946 Benzyl n-valerate Benzyl valerate Pentanoic acid, phenylmethyl ester Valeric acid, benzyl ester EINECS 233-789-7 49337_FLUKA
CCC(=O)OCc1ccccc1	Phenylmethyl propanoate	Phenylmethyl propanoate propanoic acid phenylmethyl ester propionic acid benzyl ester 122-63-4 NSC46100 Propanoic acid, phenylmethyl ester Propionic acid, benzyl ester AI3-02952 Benzyl propanoate Benzyl propionate (natrual) EINECS 204-559-3 FEMA No. 2150 NSC 46100 Phenylmethyl propionate Propionic acid, benzyl ester (6CI,7CI,8CI) W215007_ALDRICH W215015_ALDRICH ST5405461 ZINC00394884 Benzyl propi…	122-63-4
CC(=C)c1ccccc1		prop-1-en-2-ylbenzene Isopropenylbenzene 98-83-9 25014-31-7 42612-14-6 NSC9400 Styrene, .alpha.-methyl- WLN: 1YR & U1 as-Methylphenylethylene 81514_FLUKA 81517_FLUKA 81518_FLUKA 69168_FLUKA alpha-Methylstyrene monomer C14395 81519_FLUKA 81520_FLUKA 81522_FLUKA 81524_FLUKA 2-phenyl-2-propene 69170_FLUKA (1-Methylethenyl)benzene 1-Methyl-1-phenylethene 1-MethylethenylBenzine 1-Methylethylenebenzene…	98-83-9 25014-31-7 42612-14-6
C=CC(O)=O		prop-2-enoic acid Acrylic acid 29862-29-1 55927-87-2 101360-15-0 104922-39-6 105913-47-1 11132-69-7 125857-68-3 165724-08-3 174594-09-3 25987-55-7 37241-23-9 39341-22-5 51142-25-7 54578-44-8 54990-82-8 56747-65-0 59233-19-1 65742-16-7 71767-27-6 71767-28-7 81031-52-9 82446-45-5 87913-02-8 88650-89-9 9003-03-6 79-10-7 54182-57-9 9007-20-9 Carbomer 934P (NF) Carbopol 934P (TN) D03394 Carbomer 940 (…
CC(C)CCOCC(=O)OCC=C	prop-2-enyl 2-(3-methylbutoxy)acetate	prop-2-enyl 2-(3-methylbutoxy)acetate allyl 2-isopentyloxyacetate 2-isopentyloxyacetic acid allyl ester 2-isoamoxyacetic acid allyl ester prop-2-enyl 2-(3-methylbutoxy)ethanoate 67634-00-8 Acetic acid, (3-methylbutoxy)-, 2-propenyl ester Allyl (3-methylbutoxy)acetate EINECS 266-803-5 Glycolic acid 2-pentyloxy allyl ester Glycolic acid 2-pentyloxy allyl ester (natural) Isoamyloxyacetic acid, allyl…	67634-00-8
C=CCOC(=O)COc1ccccc1	prop-2-enyl 2-(phenoxy)acetate	prop-2-enyl 2-(phenoxy)acetate allyl 2-(phenoxy)acetate 2-(phenoxy)acetic acid allyl ester prop-2-enyl 2-(phenoxy)ethanoate 7493-74-5 EINECS 231-335-2 FEMA No. 2038 NSC 408892 ZINC01600957 ST5405462 W203807_ALDRICH NSC408892 2-Propenyl phenoxyacetate ACETIC ACID, PHENOXY-, ALLYL ESTER AI3-22347 Acetate P.A. Acetate pa Acetic acid, phenoxy-, 2-propenyl ester Allyl phenoxyacetate BRN 2102680	7493-74-5
C=CCOC(=O)Cc1ccccc1	prop-2-enyl 2-phenylacetate	prop-2-enyl 2-phenylacetate allyl 2-phenylacetate 2-phenylacetic acid allyl ester prop-2-enyl 2-phenylethanoate 1797-74-6 NSC6574 Phenylacetic acid allyl ester WLN: 1U2OV1R 2-Propenyl benzeneacetate 3-09-00-02181 (Beilstein Handbook Reference) AI3-22225 Allyl alpha-toluate BRN 1867491 EINECS 217-281-2 FEMA No. 2039 NSC 6574 W203904_ALDRICH 2-Propenyl phenylacetate Acetic acid, phenyl-, allyl este…	1797-74-6
CC(CC(=O)OCC=C)CC(C)(C)C		prop-2-enyl 3,5,5-trimethylhexanoate Allyl 3,5,5-trimethylhexanoate 3,5,5-Trimethylhexanoic acid allyl ester 71500-37-3 71500-21-5 Allyl trimethylhexanoate BRN 2079208 HEXANOIC ACID, 3,5,5-TRIMETHYL-, ALLYL ESTER EINECS 275-536-3 Hexanoic acid, 3,5,5-trimethyl-, 2-propenyl ester 2-Propenyl 3,5,5-trimethylhexanoate
CC(C)CC(=O)OCC=C	prop-2-enyl 3-methylbutanoate	prop-2-enyl 3-methylbutanoate Allyl 3-methylbutanoate 3-methylbutanoic acid allyl ester 3-methylbutyric acid allyl ester 2835-39-4 Allyl isovalerate Butanoic acid, 3-methyl-, 2-propenyl ester Butyric acid, 3-methyl-, allyl ester Isovaleric acid, allyl ester NCI-C54717 NSC18606 WLN: 1Y1&1VO2U1 NCGC00164414-01 W204501_ALDRICH 2-Propenyl 3-methylbutanoate 2-Propenyl isopentanoate 2-Propenyl isovaler…
CCC(C)(C)CCCC(=O)OCC=C	prop-2-enyl 5,5-dimethylheptanoate	prop-2-enyl 5,5-dimethylheptanoate allyl 5,5-dimethylheptanoate 5,5-dimethylheptanoic acid allyl ester 5,5-dimethylenanthic acid allyl ester 68132-80-9 Allyl isononylate Allyl trimethylhexoate EINECS 268-648-9 Hexanoic acid, trimethyl-, 2-propenyl ester
CCCCCCC(=O)OCC=C	prop-2-enyl heptanoate	prop-2-enyl heptanoate Allyl heptanoate heptanoic acid allyl ester enanthic acid allyl ester 142-19-8 W203106_ALDRICH EINECS 205-527-1 NSC 20969 FEMA No. 2031 AI3-36009 2-Propenyl heptanoate Allyl enanthate Allyl heptoate Allyl heptylate Heptanoic acid, 2-propenyl ester Heptanoic acid, allyl ester NSC20969 WLN: 6VO2U1 ZINC01577282 Allyl heptanoate (natural) Allylester kyseliny enanthove [Czech]	142-19-8
CCCCCC#CC(=O)OCC=C		prop-2-enyl oct-2-ynoate Allyl oct-2-ynoate oct-2-ynoic acid allyl ester 73157-43-4 2-Octynoic acid, 2-propenyl ester EINECS 277-303-1
CCCCCCCC(=O)OCC=C	prop-2-enyl octanoate	prop-2-enyl octanoate Allyl octanoate octanoic acid allyl ester caprylic acid allyl ester 4230-97-1 Allyl octylate AllOCOHep W203718_ALDRICH AIDS-005097 2-Propenyl octanoate EINECS 224-184-9 Allyl caprylate NSC32645 Octanoic acid, 2-propenyl ester Octanoic acid, allyl ester WLN: 7VO2U1 BRN 1768774 InChI=1/C11H20O2/c1-3-5-6-7-8-9-11(12)13-10-4-2/h4H,2-3,5-10H2,1H FEMA No. 2037 NSC 32645 3-02-00-00…	4230-97-1
CCC(=O)OCC=C	prop-2-enyl propanoate	prop-2-enyl propanoate Allyl propanoate propanoic acid allyl ester propionic acid allyl ester 2408-20-0 Allyl propionate NSC7620 Propanoic acid, 2-propenyl ester Propionic acid, allyl ester EINECS 219-307-8 FEMA No. 2040 NSC 7620 2-Propenyl propanoate Propionic acid, allyl ester (8CI) AI3-24478 W204005_ALDRICH	2408-20-0
CC(C)OC(=O)C(=C)C#N		propan-2-yl 2-cyanoprop-2-enoate isopropyl 2-cyanoprop-2-enoate 2-cyanoprop-2-enoic acid isopropyl ester 2-cyanoacrylic acid isopropyl ester 10586-17-1 2-Propenoic acid, 2-cyano-, 1-methylethyl ester Acrylic acid, 2-cyano-, isopropyl ester EINECS 234-188-2 Isopropyl 2-cyanoacrylate Isopropyl alpha-cyanoacrylate Isopropyl cyanoacrylate	10586-17-1
CC(C)OC(=O)CS	propan-2-yl 2-sulfanylacetate	propan-2-yl 2-sulfanylacetate isopropyl 2-sulfanylacetate 2-mercaptoacetic acid isopropyl ester propan-2-yl 2-sulfanylethanoate 7383-61-1 EINECS 230-956-6 Isopropyl mercaptoacetate
CC(C)OC(=O)CC(C)C	propan-2-yl 3-methylbutanoate	propan-2-yl 3-methylbutanoate Isopropyl 3-methylbutanoate 3-methylbutanoic acid isopropyl ester 3-methylbutyric acid isopropyl ester 32665-23-9 626-54-0 1-Methylethyl 3-methylbutanoate AI3-33617 Butanoic acid, 3-methyl-, 1-methylethyl ester EINECS 251-145-3 FEMA No. 2961 Isopropyl 3-methylbutyrate Isopropyl isopentanoate Isopropyl isovalerate Isopropyl isovalianate Isovaleric acid, isopropyl este…
CCC=O	propanal	propanal Propionaldehyde 123-38-6 LS-679 1-Propanone FEMA Number 2923 HSDB 1193 NCI-C61029 NSC 6493 Propionaldehyde (natural) Propionaldehyde [UN1275] [Flammable liquid] AI3-16114 Methylacetaldehyde NSC6493 Propaldehyde Propanaldehyde Propional Propionic aldehyde Propylaldehyde Propylic aldehyde WLN: VH2 n-Propanal Propyl aldehyde UN1275 NCGC00091772-01 Propanalaldehyde UN 1275 c0207 n-Propionald…	123-38-6
CC(=C)C(=O)OCCC	propyl 2-methylprop-2-enoate	propyl 2-methylprop-2-enoate 2-methylprop-2-enoic acid propyl ester 2-methylacrylic acid propyl ester 30110-61-3 2210-28-8 propyl 2-methylacrylate 2-Propenoic acid, 2-methyl-, propyl ester Methacrylic acid, propyl ester NSC32624 Propyl 2-methyl-2-propenoate Propyl methacrylate WLN: 3OVY1&U1 n-Propyl methacrylate AI3-14513 BRN 1744849 CCRIS 4864 EINECS 218-639-0 HSDB 5455 NSC 32624 4-02-00-01524 (…	30110-61-3 2210-28-8
CCCOC(C)=O		Propyl acetate acetic acid propyl ester Propyl ethanoate 109-60-4 40858_FLUKA W292516_ALDRICH ZINC01697403 1-Acetoxypropane 1-Propyl acetate Acetate de propyle normal Acetic acid, n-propyl ester Acetic acid, propyl ester NSC72025 Octan propylu WLN: 3OV1 n-Propyl acetate n-Propyl ethanoate ACETIC ACID,PROPYL ESTER InChI=1/C5H10O2/c1-3-4-7-5(2)6/h3-4H2,1-2H 4-02-00-00138 (Beilstein Handbook Referen…	109-60-4
CCCOC(=O)CCC	Propyl butanoate	Propyl butanoate butanoic acid propyl ester butyric acid propyl ester 105-66-8 291838_ALDRICH 1-Propyl butyrate 4-02-00-00788 (Beilstein Handbook Reference) AI3-06123 BRN 1745552 Butanoic acid, propyl ester Butyric acid, propyl ester EINECS 203-320-0 FEMA No. 2934 PROPYLBUTYRATE Propyl butyrate Propyl butyrate (natural) Propyl n-butyrate Propylester kyseliny maselne [Czech] W293407_ALDRICH 19370_…
O=C1CCCN1	pyrrolidin-2-one	pyrrolidin-2-one 2-Pyrrolidinone 2-Pyrrolidone 22580-55-8 616-45-5 .alpha.-Pyrrolidinone .alpha.-Pyrrolidone .gamma.-Aminobutyric lactam .gamma.-Aminobutyrolactam .gamma.-Butyrolactam 2-Oxopyrrolidine 2-Pyrol 4-Aminobutyric acid lactam Butanoic acid, 4-amino-, lactam Butyrolactam NSC4593 Pyrrolidon Pyrrolidone WLN: T5MVTJ 2-PYRROLIDONE MFC4 H7 N1 O1 InChI=1/C4H7NO/c6-4-2-1-3-5-4/h1-3H2,(H,5,6 ZIN…	22580-55-8 616-45-5
CC(C)CC(=O)SC(C)CC	S-butan-2-yl 3-methylbutanethioate	S-butan-2-yl 3-methylbutanethioate S-sec-Butyl 3-methylbutanethioate 3-methylbutanethioic acid S-sec-butyl ester 2432-91-9 73003-63-1 Butyric acid, 3-methy,lthio-, S-sec-butyl ester Butanethioic acid, 3-methyl-, S-(1-methylpropyl) ester EINECS 219-416-0 S-1-Methylpropyl 3-methylbutanethioate S-sec-Butyl thioisovalerate S-sec-Butylthioisovalerate sec-Butyl 3-methylbutanethioate sec-Butyl thioisova…
CC(C)=CC(=O)SC(C)C	S-propan-2-yl 3-methylbut-2-enethioate	S-propan-2-yl 3-methylbut-2-enethioate S-Isopropyl 3-methylbut-2-enethioate 3-methylbut-2-enethioic acid S-isopropyl ester 34365-79-2 2-Butenethioic acid, 3-methyl-, S-(1-methylethyl) ester EINECS 251-966-7 S-1-Methylethyl 3-methylbut-2-enethioate S-Isopropyl 3-methylthiocrotonate	34365-79-2
CC(C)SC(=O)CC(C)C		S-propan-2-yl 3-methylbutanethioate S-Isopropyl 3-methylbutanethioate 3-methylbutanethioic acid S-isopropyl ester 34322-06-0 3-Methylthiobutyric acid, S-isopropyl ester Butanethioic acid, 3-methyl-, S-(1-methylethyl) ester EINECS 251-936-3 S-1-Methylethyl 3-methylbutanethioate S-Isopropyl 3-methylthiobutyrate	34322-06-0
CC(=C)C(=O)OC(C)(C)C	tert-butyl 2-methylprop-2-enoate	tert-butyl 2-methylprop-2-enoate 2-methylprop-2-enoic acid tert-butyl ester 2-methylacrylic acid tert-butyl ester 585-07-9 Poly(tert-butyl methacrylate) 81477_FLUKA 81478_FLUKA 81479_FLUKA 81481_FLUKA 81482_FLUKA 81483_FLUKA 2-Propenoic acid, 2-methyl-, 1,1-dimethylethyl ester Methacrylic acid, tert-butyl ester NSC20957 tert-Butyl methacrylate T-BUTYL METHACRYLATE 81485_FLUKA 463353_ALDRICH 81486…	585-07-9
CO[Si](OC)(OC)OC	Tetramethoxysilane	Tetramethoxysilane 12547-31-8 681-84-5 113837-65-3 12002-26-5 136959-63-2 143478-32-4 188853-76-1 213778-75-7 251638-46-7 25498-02-6 294858-92-7 299177-59-6 340701-13-5 Silicic acid, methyl ester Silicon methylate Silres MSE 100 Tetramethoxysilane homopolymer Tetramethoxysilane polymer Methyl orthosilicate Methyl silicate Methyl silicate ((CH3)4SiO4) Methyl silicate ((MeO)4Si) NSC67383 Silane, te…
N#CS		thiocyanic acid 31782-33-9 42402-57-3 56925-41-8 60773-52-6 60930-21-4 80864-27-3 463-56-9 134932-16-4 EINECS 207-337-4 SCN HSCN hydrogen thiocyanate C01755 CHEBI:29200 HS-C#N N#C-SH [C(N)(SH)] [CN(SH)] nitridosulfanidocarbon	31782-33-9 42402-57-3 56925-41-8 60773-52-6 60930-21-4 80864-27-3 463-56-9 134932-16-4
O=C1CSCCN1		Thiomorpholin-3-one 3-Thiomorpholinone 20196-21-8 1,4-Tetrahydrothiazine-3-one 4-27-00-02550 (Beilstein Handbook Reference) BRN 0107799 EINECS 243-581-8 NSC 27540 Thiomorpholinone STOCK3S-42649 3-Oxothiomorpholine NSC27540 ZINC04137257 InChI=1/C4H7NOS/c6-4-3-7-2-1-5-4/h1-3H2,(H,5,6	20196-21-8
CCCCCCCCCCC=CC=O	tridec-2-enal (E)-tridec-2-enal	tridec-2-enal (E)-tridec-2-enal 7774-82-5 7069-41-2 2-TRIDECENAL 3-Decylacrolein EINECS 231-883-2 FEMA No. 3082 trans-2-Tridecenal EINECS 230-362-7 (E)-Tridecen-2-al (2E)-2-Tridecenal 2-Tridecenal, (E)- W308218_ALDRICH NSC617616 LMFA06000075 NCI60_005309	7774-82-5 7069-41-2
CCO[Si](CCC(F)(F)C(F)(F)C(F)(F)C(F)(F)C(F)(F)C(F)(F)F)(OCC)OCC	triethoxy-(3,3,4,4,5,5,6,6,7,7,8,8,8-tridecafluorooctyl)silane	triethoxy-(3,3,4,4,5,5,6,6,7,7,8,8,8-tridecafluorooctyl)silane 295329-01-0 51851-37-7 Triethoxy(3,3,4,4,5,5,6,6,7,7,8,8,8-tridecafluorooctyl)silane 1H,1H,2H,2H-Perfluorooctyltriethoxysilane 667420_ALDRICH Triethoxy(1H,1H,2H,2H-perfluoro-1-octyl)silane Triethoxy(3,3,4,4,5,5,6,6,7,7,8,8,8-tridecafluoro-1-octyl)silane EINECS 257-473-3 Silane, triethoxy(3,3,4,4,5,5,6,6,7,7,8,8,8-tridecafluorooctyl)- …	295329-01-0 51851-37-7
CCOP(=O)(OCC)OCC		triethoxy-hydroxyphosphanium Triethyl phosphate triethoxy-hydroxy-phosphonium phosphoric acid triethyl ester triethoxy-hydroxyphosphonium triethoxy-hydroxy-phosphanium 78-40-0 90530_FLUKA TEP InChI=1/C6H15O4P/c1-4-8-11(7,9-5-2)10-6-3/h4-6H2,1-3H ZINC01641077 538728_ALDRICH NCGC00091606-02 NCGC00091606-01 4-01-00-01339 (Beilstein Handbook Reference) AI3-00653 BRN 1705772 CCRIS 4882 EINECS 201-114-…
CCCCCCCC[Si](OCC)(OCC)OCC		triethoxy-octylsilane triethoxy-octyl-silane 2943-75-1 NSC42964 Octyl(triethoxy)silane Octyltriethoxysilane Silane, triethoxyoctyl- n-Octyltriethoxysilane Prosil 9234 440213_ALDRICH Dow Corning product Z-6341 Triethoxy(octyl)silane Triethoxyoctylsilane Silquest A 137 NCGC00164371-01 Prosil 9202 Y 9187 NSC 42964 A 137 (coupling agent) Dynasylan OCTEO EINECS 220-941-2 679305_ALDRICH	2943-75-1
CC[N+](Cc1ccccc1)(CC)CC		triethyl-(phenylmethyl)azanium triethyl-(phenylmethyl)ammonium benzyl-triethyl-ammonium 16652-03-2 ZINC01496993 Ammonium, benzyltriethyl- Triethylbenzylammonium InChI=1/C13H22N/c1-4-14(5-2,6-3)12-13-10-8-7-9-11-13/h7-11H,4-6,12H2,1-3H3/q+	16652-03-2
CO[Si](CCCOCC1CO1)(OC)OC	trimethoxy-[3-(oxiran-2-ylmethoxy)propyl]silane	trimethoxy-[3-(oxiran-2-ylmethoxy)propyl]silane trimethoxy-[3-(2-oxiranylmethoxy)propyl]silane 3-glycidoxypropyl-trimethoxy-silane 26348-10-7 51938-40-0 53029-18-8 65323-93-5 88385-40-4 25704-87-4 108727-79-3 120026-01-9 138590-36-0 163035-07-2 2530-83-8 Silicone A-187 Silicone KBM 403 Union carbide A-187 Y 4087 Z 6040 gamma-Glycidoxypropyltrimethoxysilane ((2,3-Epoxypropoxy)propyl)trimethoxysila…	26348-10-7 51938-40-0 53029-18-8 65323-93-5 88385-40-4 25704-87-4 108727-79-3 120026-01-9 138590-36-0 163035-07-2 2530-83-8
C[Si](OC)(OC)OC	trimethoxy-methylsilane	trimethoxy-methylsilane trimethoxy-methyl-silane 106153-30-4 1185-55-3 120250-60-4 Dow Corning product Z-6070 246174_ALDRICH 69471_FLUKA NSC93883 WLN: 1O-SI-1&O1&O1 679232_ALDRICH 440175_ALDRICH EINECS 214-685-0 Methyltrimethoxysilane NSC 93883 SILANE, METHYLTRIMETHOXY- Silane A-163 Silane, trimethoxymethyl- Trimethoxy(methyl)silane Trimethoxymethylsilane Union carbide A-163 Z 6070	106153-30-4 1185-55-3 120250-60-4
CC(=C)C(=O)OCC[N+](C)(C)C	trimethyl-[2-(2-methylprop-2-enoyloxy)ethyl]azanium	trimethyl-[2-(2-methylprop-2-enoyloxy)ethyl]azanium trimethyl-[2-(2-methylprop-2-enoyloxy)ethyl]ammonium trimethyl-[2-(2-methyl-1-oxoprop-2-enoxy)ethyl]ammonium 2-methacryloyloxyethyl-trimethyl-ammonium NCGC00164165-01 Methacrylylcholine ZINC02528019 N,N,N-Trimethyl-2-((2-methyl-1-oxo-2-propenyl)oxy)ethanaminium
CC(=C)C(=O)NCCC[N+](C)(C)C		trimethyl-[3-(2-methylprop-2-enoylamino)propyl]azanium trimethyl-[3-(2-methylprop-2-enoylamino)propyl]ammonium trimethyl-[3-[(2-methyl-1-oxoprop-2-enyl)amino]propyl]ammonium 3-methacrylamidopropyl-trimethyl-ammonium
CCCCCCCCCCCCCCCCCC(=O)NCCC[N+](C)(C)C	trimethyl-[3-(octadecanoylamino)propyl]azanium	trimethyl-[3-(octadecanoylamino)propyl]azanium trimethyl-[3-(octadecanoylamino)propyl]ammonium trimethyl-[3-(1-oxooctadecylamino)propyl]ammonium trimethyl-(3-stearamidopropyl)ammonium
C[N+](C)(C)CCCNC(=O)CCCCCCCCC=C	trimethyl-[3-(undec-10-enoylamino)propyl]azanium	trimethyl-[3-(undec-10-enoylamino)propyl]azanium trimethyl-[3-(undec-10-enoylamino)propyl]ammonium trimethyl-[3-(1-oxoundec-10-enylamino)propyl]ammonium
C[Si](C)(C)OCC(=O)O[Si](C)(C)C	trimethylsilyl 2-trimethylsilyloxyacetate	trimethylsilyl 2-trimethylsilyloxyacetate 2-trimethylsilyloxyacetic acid trimethylsilyl ester trimethylsilyl 2-trimethylsilyloxyethanoate 33581-77-0 EINECS 251-580-9 Trimethylsilyl ((trimethylsilyl)oxy)acetate Acetic acid, (trimethylsiloxy)-, trimethylsilyl ester Acetic acid, [(trimethylsilyl)oxy]-, trimethylsilyl ester 92743_FLUKA 276189_ALDRICH Trimethylsilyl trimethylsiloxyacetate	33581-77-0
O=P(Oc1ccccc1)(Oc1ccccc1)Oc1ccccc1	Triphenyl phosphate hydroxy-tris(phenoxy)phosphanium	Triphenyl phosphate hydroxy-tris(phenoxy)phosphanium hydroxy-tris(phenoxy)phosphonium phosphoric acid triphenyl ester 402955-02-6 115-86-6 93080_FLUKA 4-06-00-00720 (Beilstein Handbook Reference) AI3-04491 BRN 1888236 CCRIS 4888 EINECS 204-112-2 HSDB 2536 NSC 57868 Trifenylfosfat [Czech] Triphenylphosphate 442829_SUPELCO 48064_SUPELCO Triphenyl phosphate solution NCGC00164033-01 551392_ALDRICH C1…	402955-02-6 115-86-6
CC(=O)OCCCCCCCCCC=C		Undec-10-enyl acetate acetic acid undec-10-enyl ester undec-10-enyl ethanoate 112-19-6 FEMA No. 3096 NSC 525 1-Undecen-11-yl acetate 10-Hendecen-1-yl acetate 10-Undecen-1-ol acetate 10-Undecen-1-ol, acetate 10-Undecen-1-yl acetate 10-Undecenyl acetate Acetate C-11 NSC525 Undecenyl acetate WLN: 1VO10U1 Undecylenyl acetate 10-Hendecenyl acetate AI3-03928 BRN 1769966 EINECS 203-944-3	112-19-6
CCCCCCCCC=CC=O	Undec-2-enal (E)-Undec-2-enal	Undec-2-enal (E)-Undec-2-enal 2463-77-6 53448-07-0 1337-83-3 Aldehyde iso C-11 Undecenal EINECS 258-559-3 2-Undecenal, (E)- EINECS 215-656-5 (2E)-2-Undecenal W342300_ALDRICH trans-2-Undecenal 2-UNDECENAL 2-Undecen-1-al AI3-36265 EINECS 219-564-6 FEMA No. 3423 LMFA06000065
CCC=CCCCCCCC=O	undec-8-enal (E)-undec-8-enal	undec-8-enal (E)-undec-8-enal
NC(N)=O	UREA	UREA 4744-36-9 57-13-6 173144-80-4 173994-65-5 174693-33-5 175276-38-7 30535-50-3 37955-36-5 Urea perhydrate Urepeal Spectrum4_001168 Spectrum5_001862 Urepeal L NCGC00090892-02 NCGC00090892-03 Elaqua XX Carbamimic acid U4883_SIGMA U4884_SIGMA carbamide carmol BSPBio_003341 Carbamimidic acid (VAN) U5128_SIAL ARF KBioSS_001152 U5378_SIGMA 51465_FLUKA KBio2_001152 KBio2_003720 KBio2_006288 KBio1_000…	4744-36-9 57-13-6 173144-80-4 173994-65-5 174693-33-5 175276-38-7 30535-50-3 37955-36-5
