# Supplementary material for: QSAR models of human data can enrich or replace LLNA testing for human skin sensitization
Source: Royal Society of Chemistry journal article supplement (doi:10.1039/c6gc01836j), 2016-01-01
Supplement: c6gc01836j3.pdf [file c6gc01836j3.pdf]

## Supplemental Materials

# QSAR models of human data can enrich or replace LLNA testing for human skin sensitization

*Vinicius M. Alves,<sup>a,b</sup> Stephen J. Capuzzi,<sup>a</sup> Eugene Muratov,<sup>a,c</sup> Rodolpho C. Braga,<sup>b</sup> Thomas Thornton,<sup>a</sup> Denis Fourches,<sup>d</sup> Judy Strickland,<sup>e</sup> Nicole Kleinstreuer,<sup>f</sup> Carolina H. Andrade,<sup>b</sup> and Alexander Tropsha.<sup>a,\*</sup>*

<sup>a</sup> Laboratory for Molecular Modeling, Division of Chemical Biology and Medicinal Chemistry, UNC Eshelman School of Pharmacy, University of North Carolina, Chapel Hill, NC, 27599, USA.

<sup>b</sup> Laboratory for Molecular Modeling and Design, Faculty of Pharmacy, Federal University of Goias, Goiania, GO, 74605-170, Brazil.

<sup>c</sup> Department of Chemical Technology, Odessa National Polytechnic University, Odessa, 65000, Ukraine.

<sup>d</sup> Department of Chemistry, Bioinformatics Research Center, North Carolina State University, Raleigh, NC, 27695, USA.

<sup>e</sup> Integrated Laboratory Systems, Inc., P.O. Box 13501, Research Triangle Park, NC, 27709, USA.

<sup>f</sup> National Institutes of Environmental Health Sciences, Research Triangle Park, NC, 27709, USA.

## Corresponding Author

\* Address for correspondence: 100K Beard Hall, UNC Eshelman School of Pharmacy, University of North Carolina, Chapel Hill, NC, 27599, USA; Telephone: (919) 966-2955; FAX: (919) 966-0204; E-mail: [alex\\_tropsha@unc.edu](mailto:alex_tropsha@unc.edu).

## Table of Contents

|                                                                                                                                                                                                  |    |
|--------------------------------------------------------------------------------------------------------------------------------------------------------------------------------------------------|----|
| <b>Cluster analysis</b> .....                                                                                                                                                                    | 3  |
| <b>Table S1.</b> Number of records, assay outcome, and QSAR prediction for the 62 substances with multiple records present in the human skin sensitization dataset (Dataset A). .....            | 7  |
| <b>Table S2.</b> Number of records and the data outcome for the 19 substances with different annotations between the records present in the murine skin sensitization dataset (Dataset B). ..... | 10 |
| <b>Table S3.</b> List of chemical compounds predicted as sensitizers and confirmed in the literature. .....                                                                                      | 11 |
| <b>REFERENCES</b> .....                                                                                                                                                                          | 12 |

## Cluster analysis

In Cluster 1, there are four sensitizers and four non-sensitizers. All sensitizers were predicted correctly by QSAR. Similar to outliers in previous sections, benzyl alcohol (sensitizer) has a high  $DSA_{05}$  of  $48.67 \mu\text{g}/\text{cm}^2$  ( $45.06 \text{ mol}/\text{m}^2$ ) and a NOEL of  $5,906 \mu\text{g}/\text{cm}^2$  ( $5.47 \text{ mol}/\text{m}^2$ ). The very low skin sensitization potency may be the reason for the wrong prediction by our QSAR model. Propylidene phthalate was also mispredicted. The other two sensitizers (2-mercaptobenzothiazole and benzisothiazole) were correctly predicted. Human non-sensitizers benzoic acid, salicylic acid, methyl salicylate, and resorcinol were correctly predicted by QSAR. Of those, the only compound correctly predicted by LLNA was benzoic acid. In a recent study <sup>1</sup>, resorcinol is labeled as a human sensitizer, but no NOEL is available. It is used at high levels in hair dyes and skin preparations, but is not considered to be dangerous, since it has a low frequency of human sensitization.

Pyridine, one of the outliers detected in the previous section, is in the cluster of aromatic amines (Cluster 2). Within this cluster, sulfanilamide (human sensitizer) was the only compound mispredicted by the LLNA. The two non-sensitizers (p-aminobenzoic acid and sulfanilic acid) were mispredicted by QSAR model. Sulfanilamide has a similar structure to sulfanilic acid, with Tanimoto coefficient equal to 0.83. The substitution of a sulfo group or a carboxyl in the *para*-position of aniline decreases sensitization potency, while another amine preserves it.

Phenyl benzoate was also identified as an outlier, due to the high  $DSA_{05}$ , which shows that this compound is safe at low concentrations in most of the tested population. All of the non-sensitizers in this cluster (Cluster 3) were mispredicted by the LLNA and correctly predicted by QSAR: benzyl cinnamate, benzyl benzoate, benzyl salicylate, and hexyl salicylate. The sensitizers

benzoyl peroxide and phenyl benzoate were mispredicted and correctly predicted, respectively. Both compounds were correctly predicted by the LLNA.

In Cluster 8,  $\alpha$ -amylcinnamyl alcohol is the only human sensitizer. This compound was predicted as a non-sensitizer by LLNA and QSAR. All other compounds ( $\alpha$ -amylcinnamic aldehyde, hexyl cinnamic aldehyde, and hexyl salicylate) were human non-sensitizers and were mispredicted by LLNA correctly predicted by QSAR. In a recent publication <sup>1</sup>, hexyl salicylate and  $\alpha$ -amylcinnamic aldehyde are labeled as human sensitizers. The first has a NOELs as 35,433 (15.96 mol/m<sup>2</sup>), which indicates low sensitization rates in the tested populations at relatively high doses, while the second is in fact a strong sensitizer, with DSA<sub>05</sub> of 23.622 ( $\mu$ g/cm<sup>2</sup>) 0.01 (mol/m<sup>2</sup>).

In the Cluster 11, lilial was the only compound correctly predicted by QSAR models. This compound is labeled as a sensitizer; however, it has a high DSA<sub>05</sub>, since at the LOEL of 29.53  $\mu$ g/cm<sup>2</sup> it was positive in only one out of 225 people. Cyclamen aldehyde (non-sensitizer) was mispredicted, while bourgeonal (sensitizer) and majantal (non-sensitizer) were predicted as sensitizers. All the compounds in this cluster, except cyclamen aldehyde, were correctly predicted by LLNA.

**Table S1.** Number of records, assay outcome, and QSAR prediction for the 62 substances with multiple records present in the human skin sensitization dataset (Dataset A).

| #  | Compound name                          | CASRN                   | No. of records | No. of sensitizers | No. of non-sensitizers | QSAR           |
|----|----------------------------------------|-------------------------|----------------|--------------------|------------------------|----------------|
| 1  | (Chloro)methylisothiazolinone (Kathon) | 26172-55-4              | 14             | 4                  | 10                     | Not predicted  |
| 2  | Hydroxycitronellal                     | 107-75-5                | 12             | 8                  | 4                      | Sensitizer     |
| 3  | Cinnamyl alcohol                       | 104-54-1                | 10             | 6                  | 4                      | Sensitizer     |
| 4  | Cinnamic aldehyde                      | 104-55-2                | 8              | 5                  | 3                      | Sensitizer     |
| 5  | Citral                                 | 5392-40-5               | 7              | 5                  | 2                      | Non-sensitizer |
| 6  | Streptomycin                           | 3810-74-0               | 6              | 6                  | 0                      | Sensitizer     |
| 7  | Phenylacetaldehyde                     | 122-78-1                | 6              | 5                  | 1                      | Non-sensitizer |
| 8  | Geraniol                               | 106-24-1                | 6              | 2                  | 4                      | Sensitizer     |
| 9  | Benzoyl peroxide                       | 94-36-0                 | 5              | 5                  | 0                      | Non-sensitizer |
| 10 | Neomycin sulfate                       | 1405-10-3               | 5              | 5                  | 0                      | Sensitizer     |
| 11 | Penicillin G                           | 61-33-6                 | 5              | 4                  | 1                      | Sensitizer     |
| 12 | Benzocaine                             | 94-09-7                 | 5              | 4                  | 1                      | Sensitizer     |
| 13 | Ethyl acrylate                         | 140-88-5                | 5              | 3                  | 2                      | Sensitizer     |
| 14 | Methylisothiazolinone                  | 2682-20-4               | 5              | 2                  | 3                      | Sensitizer     |
| 15 | Coumarin                               | 91-64-5                 | 5              | 2                  | 3                      | Sensitizer     |
| 16 | Eugenol                                | 97-53-0                 | 5              | 1                  | 4                      | Sensitizer     |
| 17 | <i>dl</i> -Citronellol                 | 26489-01-0              | 5              | 1                  | 4                      | Non-sensitizer |
| 18 | 4-Phenylenediamine                     | 106-50-3                | 4              | 4                  | 0                      | Sensitizer     |
| 19 | Methylhexanedione                      | 13706-86-0              | 4              | 4                  | 0                      | Non-sensitizer |
| 20 | Tetrachlorosalicylanilide              | 1154-59-2               | 4              | 4                  | 0                      | Sensitizer     |
| 21 | Isoeugenol                             | 97-54-1                 | 4              | 2                  | 2                      | Non-sensitizer |
| 22 | Lilial                                 | 80-54-6                 | 4              | 1                  | 3                      | Sensitizer     |
| 23 | Cinnamyl nitrile                       | 4360-47-8               | 4              | 1                  | 3                      | Sensitizer     |
| 24 | Potassium dichromate                   | 7778-50-9               | 3              | 3                  | 0                      | Not predicted  |
| 25 | Thioglycerol                           | 96-27-5                 | 3              | 3                  | 0                      | Non-sensitizer |
| 26 | Nickel (II) salts                      | 7718-54-9;<br>7786-81-4 | 3              | 3                  | 0                      | Not predicted  |
| 27 | Formaldehyde                           | 50-00-0                 | 3              | 2                  | 1                      | Sensitizer     |
| 28 | Tetramethylthiuram-                    | 137-26-8                | 3              | 2                  | 1                      | Sensitizer     |

|    |                                        |                                      |   |   |   |                |
|----|----------------------------------------|--------------------------------------|---|---|---|----------------|
|    | disulfide                              |                                      |   |   |   |                |
| 29 | Propylidene phthalate                  | 17369-59-4                           | 3 | 1 | 2 | Non-sensitizer |
| 30 | $\alpha$ -amylcinnamyl alcohol         | 101-85-9                             | 3 | 1 | 2 | Non-sensitizer |
| 31 | Benzyl alcohol                         | 100-51-6                             | 3 | 1 | 2 | Non-sensitizer |
| 32 | Oakmoss                                | 68917-10-2                           | 3 | 1 | 2 | Not predicted  |
| 33 | Treemoss                               | 68648-41-9                           | 3 | 1 | 2 | Not predicted  |
| 34 | Linalool                               | 78-70-6                              | 3 | 0 | 3 | Non-sensitizer |
| 35 | Clove oil (bud, leaf, stem)            | 8000-34-8                            | 3 | 0 | 3 | Not predicted  |
| 36 | 2,4-Dinitrochlorobenzene               | 97-00-7                              | 2 | 2 | 0 | Sensitizer     |
| 37 | 2-Mercaptobenzothiazole                | 149-30-4                             | 2 | 2 | 0 | Sensitizer     |
| 38 | Benzylidene acetone                    | 122-57-6                             | 2 | 2 | 0 | Non-sensitizer |
| 39 | Diethylmaleate                         | 141-05-9                             | 2 | 2 | 0 | Sensitizer     |
| 40 | Dihydrocoumarin                        | 119-84-6                             | 2 | 2 | 0 | Non-sensitizer |
| 41 | Cobalt (II) salts                      | 7646-79-9;<br>10124-43-3             | 2 | 2 | 0 | Not predicted  |
| 42 | Mercuric (II) chloride                 | 7487-94-7                            | 2 | 2 | 0 | Not predicted  |
| 43 | Benzoisothiazolione                    | 2634-33-5                            | 2 | 1 | 1 | Sensitizer     |
| 44 | Farnesol                               | 4602-84-0                            | 2 | 1 | 1 | Sensitizer     |
| 45 | Glutaraldehyde                         | 111-30-8                             | 2 | 1 | 1 | Sensitizer     |
| 46 | Imidazolidinyl urea                    | 39236-46-9                           | 2 | 1 | 1 | Sensitizer     |
| 47 | Isocyclogeraniol                       | 68527-77-5                           | 2 | 1 | 1 | Non-sensitizer |
| 48 | Methyl 2-nonynoate                     | 111-80-8                             | 2 | 1 | 1 | Sensitizer     |
| 49 | Methyl 2-octynoate                     | 111-12-6                             | 2 | 1 | 1 | Sensitizer     |
| 50 | <i>p</i> -methylhydrocinnamic aldehyde | 5406-12-2                            | 2 | 1 | 1 | Sensitizer     |
| 51 | <i>t</i> -2-Hexenal                    | 6728-26-3                            | 2 | 1 | 1 | Sensitizer     |
| 52 | Ylang Ylang                            | 8006-81-3;<br>68606-83-7; 83863-30-3 | 2 | 1 | 1 | Not predicted  |
| 53 | $\alpha$ -methyl cinnamic aldehyde     | 101-39-3                             | 2 | 0 | 2 | Non-sensitizer |
| 54 | Benzyl cinnamate                       | 103-41-3                             | 2 | 0 | 2 | Non-sensitizer |

|    |                       |            |   |   |   |                |
|----|-----------------------|------------|---|---|---|----------------|
| 55 | Benzyl salicylate     | 118-58-1   | 2 | 0 | 2 | Non-sensitizer |
| 56 | Benzylbenzoate        | 120-51-4   | 2 | 0 | 2 | Non-sensitizer |
| 57 | <i>d</i> -Limonene    | 5989-27-5  | 2 | 0 | 2 | Sensitizer     |
| 58 | Isocyclocitral        | 1335-66-6  | 2 | 0 | 2 | Non-sensitizer |
| 59 | Lyrar                 | 31906-04-4 | 2 | 0 | 2 | Sensitizer     |
| 60 | Propylene glycol      | 57-55-6    | 2 | 0 | 2 | Sensitizer     |
| 61 | $\beta$ -damascone    | 23726-91-2 | 2 | 0 | 2 | Non-sensitizer |
| 62 | Benzalkonium chloride | 8001-54-5  | 2 | 0 | 2 | Not predicted  |

**Table S2.** Number of records and the data outcome for the 19 substances with different annotations between the records present in the murine skin sensitization dataset (Dataset B).

| #  | Compound name                | CASRN                | No. of records | No. of sensitizers | No. of non-sensitizers |
|----|------------------------------|----------------------|----------------|--------------------|------------------------|
| 1  | Hexyl cinnamic aldehyde      | 101-86-0             | 44             | 42                 | 2                      |
| 2  | Eugenol                      | 97-53-0              | 31             | 30                 | 1                      |
| 3  | Benzocaine                   | 94-09-7              | 24             | 7                  | 17                     |
| 4  | Nickel (II) salts            | 7718-54-9; 7786-81-4 | 16             | 5                  | 11                     |
| 5  | Methyl salicylate            | 119-36-8             | 14             | 2                  | 12                     |
| 6  | Sodium lauryl sulfate        | 151-21-3             | 11             | 10                 | 1                      |
| 7  | Aniline                      | 62-53-3              | 11             | 6                  | 5                      |
| 8  | Potassium dichromate         | 7778-50-9            | 10             | 9                  | 1                      |
| 9  | 2-Mercaptobenzothiazole      | 149-30-4             | 8              | 6                  | 2                      |
| 10 | Geraniol                     | 106-24-1             | 7              | 6                  | 1                      |
| 11 | Tetramethylthiuram disulfide | 137-26-8             | 7              | 6                  | 1                      |
| 12 | Streptomycin                 | 3810-74-0            | 6              | 2                  | 4                      |
| 13 | Coumarin                     | 91-64-5              | 4              | 2                  | 2                      |
| 14 | Ethyl acrylate               | 140-88-5             | 3              | 2                  | 1                      |
| 15 | Zinc sulfate                 | 7733-02-0            | 3              | 2                  | 1                      |
| 16 | Resorcinol                   | 108-46-3             | 3              | 1                  | 2                      |
| 17 | Benzyl benzoate              | 120-51-4             | 2              | 1                  | 1                      |
| 18 | Ethylenediamine              | 107-15-3             | 2              | 1                  | 1                      |
| 19 | Salicylic acid               | 69-72-7              | 2              | 1                  | 1                      |



**Table S3.** List of chemical compounds predicted as sensitizers and confirmed in the literature.

| <b>Compound name</b>              | <b>CASRN</b> | <b>Function</b>                        | <b>Reference</b> |
|-----------------------------------|--------------|----------------------------------------|------------------|
| Styrene                           | 100-42-5     | Perfuming                              | 2                |
| Benzonitrile                      | 100-47-0     | Perfuming                              | 3                |
| <i>p</i> -aminodiphenylamine      | 101-54-2     | Hair dyeing                            | 4                |
| Triethylene glycol dimethacrylate | 109-16-0     | Nail conditioning                      | 5,6              |
| Ethanolamine                      | 141-43-5     | Buffering                              | 7                |
| Diallyl disulfide                 | 2179-57-9    | Perfuming                              | 8                |
| Diethylene glycol dimethacrylate  | 2358-84-1    | Nail conditioning, film forming        | 5                |
| Laureth-9, polidocanol            | 3055-99-0    | Emulsifying                            | 9                |
| Glyceryl monothioglycolate        | 30618-84-9   | Hair waivening or straightening        | 10               |
| Iodopropynyl butylcarbamate       | 55406-53-6   | Preservative                           | 11               |
| Chlorhexidine                     | 55-56-1      | Antimicrobial, oral care, preservative | 12               |
| C.I. Solvent Red 3                | 6535-42-8    | Colorant                               | 13               |
| Ethyl cyanoacrylate               | 7085-85-0    | Film forming                           | 6,14             |
| Trichloroethane                   | 71-55-6      | Solvent                                | 15               |
| Chloroacetamide                   | 79-07-2      | Preservative                           | 16               |
| Methyl methacrylate               | 80-62-6      | Anticaking, opacifying                 | 6,17             |
| Ethyleneglycol dimethacrylate     | 97-90-5      | Nail conditioning                      | 6,18             |

## REFERENCES

- 1 D. A. Basketter, N. Alépée, T. Ashikaga, J. Barroso, N. Gilmour, C. Goebel, J. Hibatallah, S. Hoffmann, P. Kern, S. Martinozzi-Teissier, G. Maxwell, K. Reisinger, H. Sakaguchi, A. Schepky, M. Tailhardat and M. Templier, *Dermat. contact, atopic, Occup. drug*, 2014, **25**, 11–21.
- 2 S. Sjöborg, S. Fregert and L. Trulsson, *Contact Dermatitis*, 1984, **10**, 94–96.
- 3 L.-F. Li, S. A. Sujan and Q. X. Li, *Contact Dermatitis*, 2004, **50**, 377–378.
- 4 C. Skudlik, E. Meyer, H. Allmers, E. Domagalski and S. M. John, *Hautarzt.*, 2011, **62**, 765–769.
- 5 L. Perale, S. De Marchi, E. Cecchin and L. A. Sechi, *Contact Dermatitis*, 2005, **53**, 181–182.
- 6 S. Shanmugam and M. Wilkinson, *Contact Dermatitis*, 2012, **67**, 309–310.
- 7 M. Bhushan, N. M. Craven and M. H. Beck, *Contact Dermatitis*, 1998, **39**, 321.
- 8 M. T. Bordel-Gómez and A. Miranda-Romero, *Contact Dermatitis*, 2008, **59**, 125–126.
- 9 R. Gallo, M. Basso, S. Voltolini and M. Guarrera, *Contact Dermatitis*, 2001, **45**, 356–357.
- 10 T. Leino, T. Estlander and L. Kanerva, *Contact Dermatitis*, 1998, **38**, 166–167.
- 11 J. P. Thyssen, K. Engkilde, M. D. Lundov, B. C. Carlsen, T. Menné and J. D. Johansen, *Contact Dermatitis*, 2010, **62**, 102–108.
- 12 R. Toholka and R. Nixon, *Australas. J. Dermatol.*, 2013, **54**, 303–306.
- 13 F. Wantke, M. Götz and R. Jarisch, *Contact Dermatitis*, 1992, **27**, 346–347.
- 14 R. R. Tomb, J. P. Lepoittevin, F. Durepaire and E. Grosshans, *Contact Dermatitis*, 1993, **28**, 206–208.
- 15 J. Mallon, M. T. Chu and H. I. Maibach, *Contact Dermatitis*, 2001, **45**, 107.

- 16 J. M. Taran and T. A. Delaney, *Australas. J. Dermatol.*, 1997, **38**, 95–96.
- 17 L. Strazzula, S. Das, V. E. Nambudiri and D. Kroshinsky, *JAMA dermatology*, 2014, **150**, 784–785.
- 18 K. Aalto-Korte, K. Alanko, O. Kuuliala and R. Jolanki, *Contact Dermatitis*, 2008, **58**, 340–346.
