# Supplementary material for: QSAR models of human data can enrich or replace LLNA testing for human skin sensitization
Source: Royal Society of Chemistry journal article supplement (doi:10.1039/c6gc01836j), 2016-01-01
Supplement: c6gc01836j4.pdf [file c6gc01836j4.pdf]

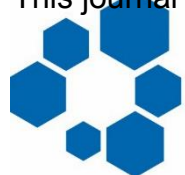

**UFG**  
UNIVERSIDADE  
FEDERAL DE GOIÁS

**LabMol**

Laboratório de Planejamento de  
Fármacos e Modelagem Molecular

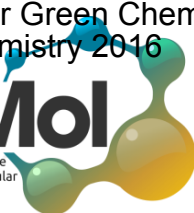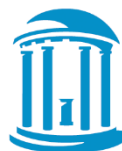

THE UNIVERSITY  
of NORTH CAROLINA  
at CHAPEL HILL

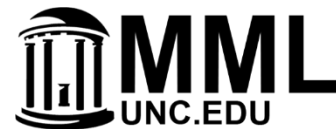

# QSAR models of human data can enrich or replace LLNA testing for human skin sensitization

*Vinicius M. Alves,<sup>a,b</sup> Stephen J. Capuzzi,<sup>a</sup> Eugene Muratov,<sup>a</sup> Rodolpho C. Braga,<sup>b</sup> Thomas Thornton,<sup>a</sup> Denis Fourches,<sup>c</sup> Judy Strickland,<sup>d</sup> Nicole Kleinstreuer,<sup>d</sup> Carolina H. Andrade,<sup>b</sup> and Alexander Tropsha<sup>a,\*</sup>*

<sup>a</sup> University of North Carolina, Chapel Hill, USA

<sup>b</sup> Federal University of Goiás, Goiás, Brazil

<sup>c</sup> North Carolina State University, Raleigh, USA

<sup>d</sup> ILS NIEHS, RTP, USA

**CLUSTER ANALYSIS OF  
HUMAN SKIN SENSITIZATION  
DATASET**

No. of compounds = 109

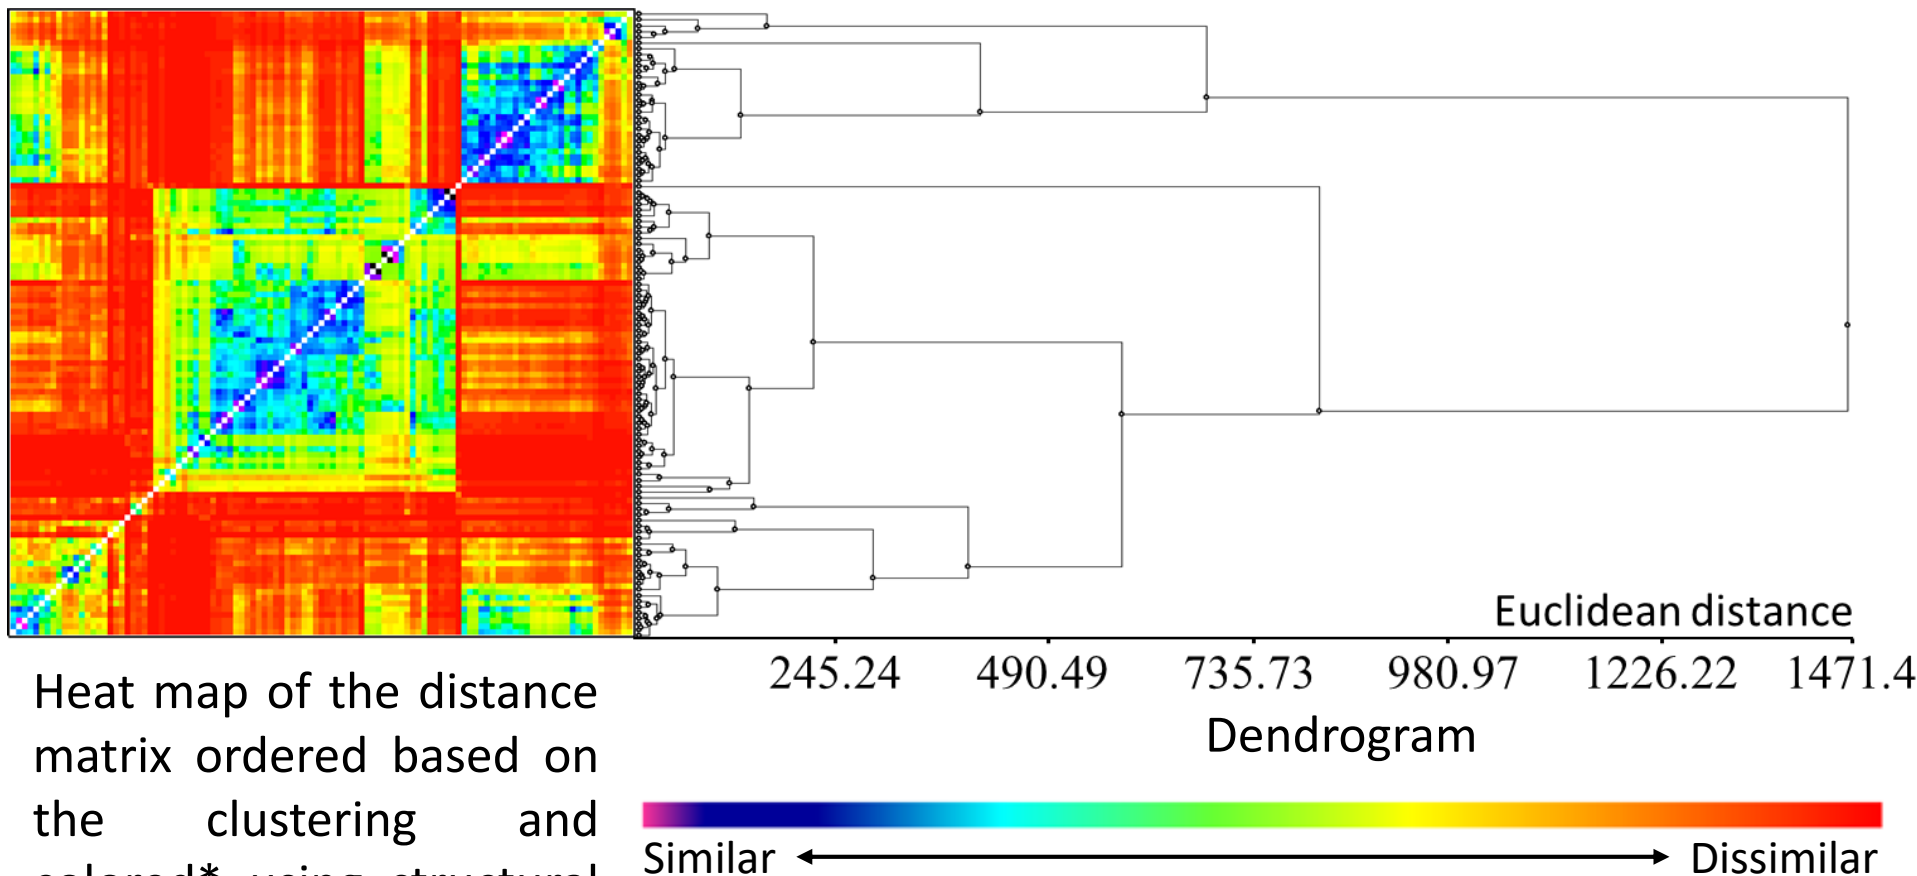

# CLUSTER 1

4

Conflicting  
experimental  
annotation  
between  
duplicates

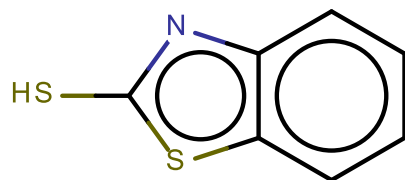

2-Mercaptobenzothiazole

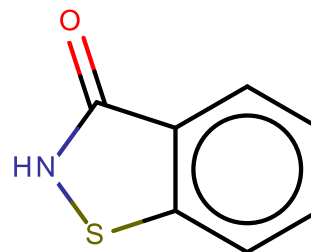

Benzisothiazolone

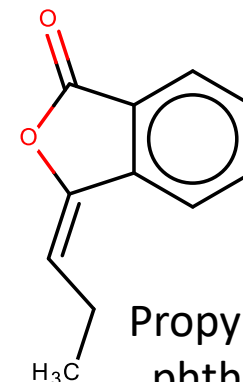

Propylidene  
phthalate

Sensitizer

Sensitizer

Sensitizer

Sensitizer

Sensitizer

Sensitizer

Sensitizer

Sensitizer

Non-sensitizer

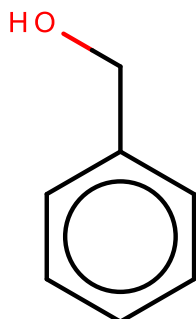

Benzyl  
alcohol

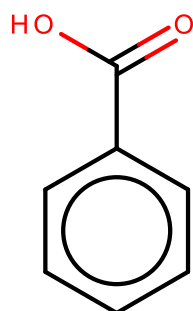

Benzoic  
acid

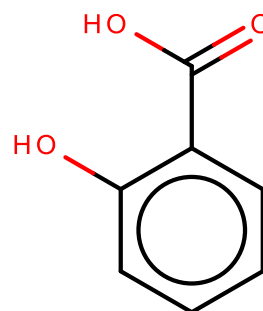

Salicylic  
acid

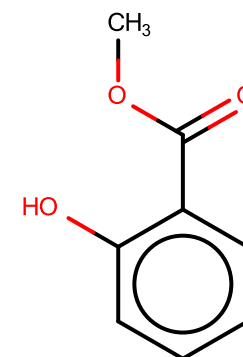

Methyl  
salicylate

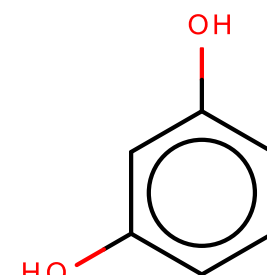

Resorcinol

Sensitizer

Non-sensitizer

Non-sensitizer

Non-sensitizer

Non-sensitizer

Non-sensitizer

Non-sensitizer

Sensitizer

Sensitizer

Sensitizer

Non-sensitizer

Non-sensitizer

Non-sensitizer

Non-sensitizer

Non-sensitizer

Human

LLNA

QSAR

Human

LLNA

QSAR

# CLUSTER 2 - AROMATIC AMINES

5

Human  
LLNA  
QSAR

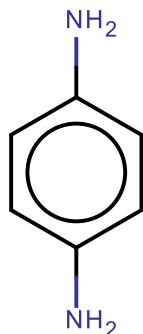

4-phenylenediamine

Sensitizer

Sensitizer

Sensitizer

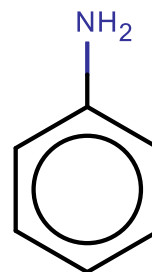

Aniline

Sensitizer

Sensitizer

Sensitizer

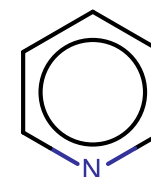

Pyridine

Sensitizer

Sensitizer

Sensitizer

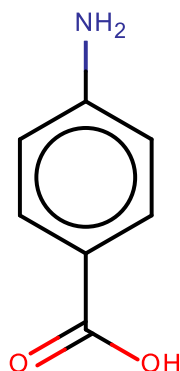

*p*-aminobenzoic acid

Non-sensitizer

Non-sensitizer

Sensitizer

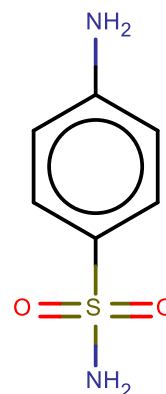

Sulfanilamide

Sensitizer

Non-sensitizer

Sensitizer

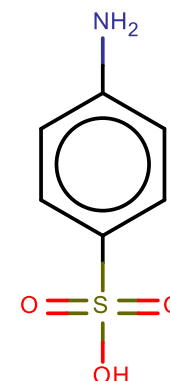

Sulfanilic acid

Non-sensitizer

Non-sensitizer

Sensitizer

Human  
LLNA  
QSAR

# CLUSTER 3 - ESTERS OF BENZOIC ACID

6

Human  
LLNA  
QSAR

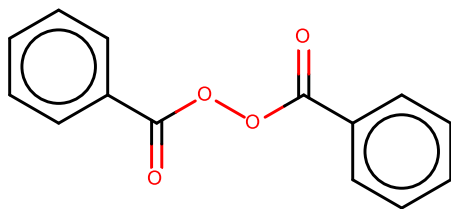

Benzoyl peroxide

Sensitizer

Sensitizer

Non-sensitizer

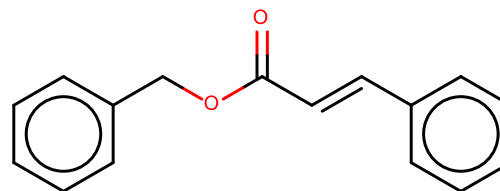

Benzyl cinnamate

Non-sensitizer

Sensitizer

Non-sensitizer

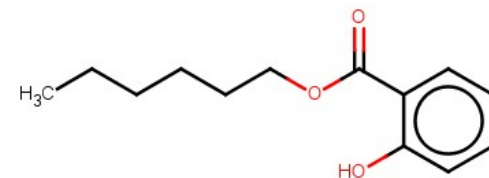

Hexyl salicylate

Non-sensitizer

Sensitizer

Non-sensitizer

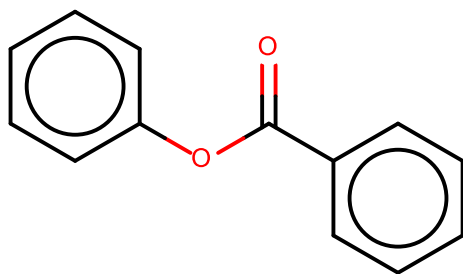

Phenyl benzoate

Sensitizer

Sensitizer

Sensitizer

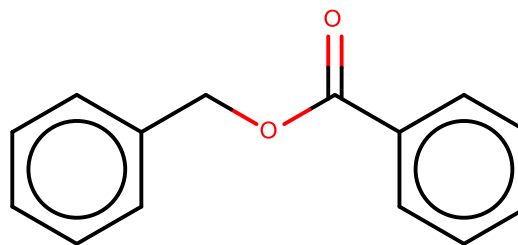

Benzyl benzoate

Non-sensitizer

Sensitizer

Non-sensitizer

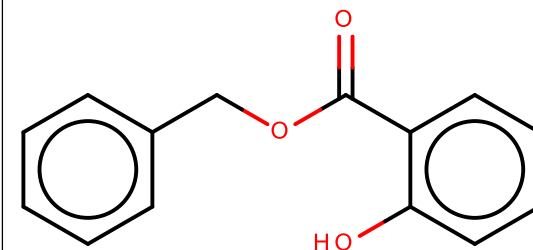

Benzyl salicylate

Non-sensitizer

Sensitizer

Non-sensitizer

Human  
LLNA  
QSAR

# CLUSTER 4 - CINNAMYL DERIVATIVES

7

Conflicting  
experimental  
annotation  
between  
duplicates

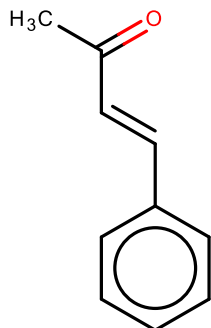

Benzylidene acetone

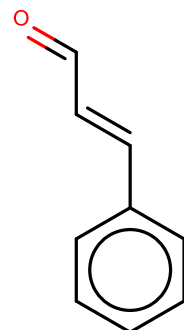

Cinnamic aldehyde

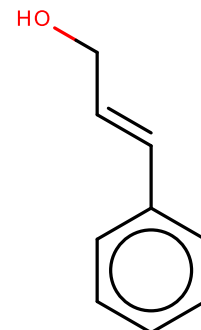

Cinnamyl alcohol

Human

Sensitizer

Sensitizer

Sensitizer

LLNA

Sensitizer

Sensitizer

Sensitizer

QSAR

Non-sensitizer

Sensitizer

Sensitizer

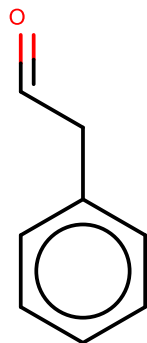

Phenylacetaldehyde

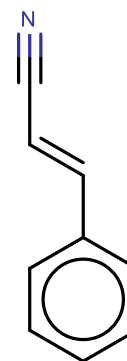

Cinnamyl nitrile

Human

Sensitizer

Sensitizer

LLNA

Sensitizer

Non-sensitizer

QSAR

Non-sensitizer

Sensitizer

# CLUSTER 5

8

Human  
LLNA  
QSAR

|                                                                                   |                                                                                    |                                                                                     |
|-----------------------------------------------------------------------------------|------------------------------------------------------------------------------------|-------------------------------------------------------------------------------------|
| 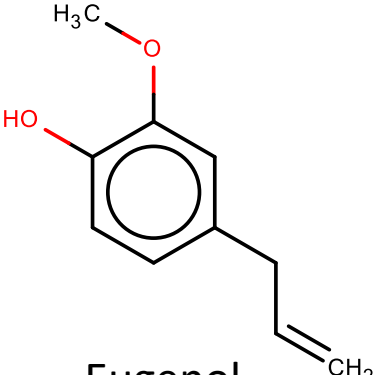 |  |  |
| Eugenol                                                                           | Isoeugenol                                                                         | Methylchavicol acetone                                                              |
| Sensitizer                                                                        | Sensitizer                                                                         | Sensitizer                                                                          |
| Sensitizer                                                                        | Sensitizer                                                                         | Sensitizer                                                                          |
| Sensitizer                                                                        | Non-sensitizer                                                                     | Sensitizer                                                                          |

Human  
LLNA  
QSAR

|                                                                                    |                                                                                     |                                                                                      |                                                                                      |
|------------------------------------------------------------------------------------|-------------------------------------------------------------------------------------|--------------------------------------------------------------------------------------|--------------------------------------------------------------------------------------|
| 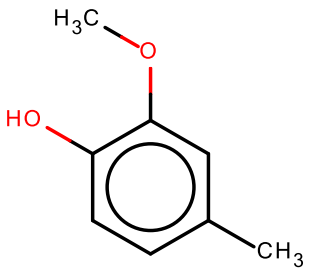 |  |  |  |
| 2-Methoxy-4-methylphenol                                                           | 4-Methoxyacetophenone                                                               | Anisyl alcohol                                                                       | Ethyl vanillin                                                                       |
| Non-sensitizer                                                                     | Non-sensitizer                                                                      | Non-sensitizer                                                                       | Non-sensitizer                                                                       |
| Sensitizer                                                                         | Non-sensitizer                                                                      | Sensitizer                                                                           | Non-sensitizer                                                                       |
| Non-sensitizer                                                                     | Sensitizer                                                                          | Non-sensitizer                                                                       | Non-sensitizer                                                                       |



# CLUSTER 6

9

Conflicting  
experimental  
annotation  
between  
duplicates

|       |                                                                                    |                                                                                      |                                                                                      |
|-------|------------------------------------------------------------------------------------|--------------------------------------------------------------------------------------|--------------------------------------------------------------------------------------|
|       | 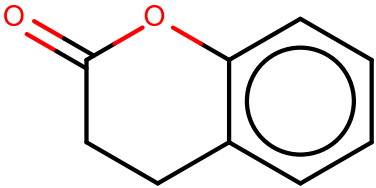  |    |   |
|       | 3,4-dihydrocoumarin                                                                | Coumarin                                                                             | 6-methylcoumarin                                                                     |
| Human | Sensitizer                                                                         | Sensitizer                                                                           | Non-sensitizer                                                                       |
| LLNA  | Sensitizer                                                                         | Sensitizer                                                                           | Non-sensitizer                                                                       |
| QSAR  | Non-sensitizer                                                                     | Sensitizer                                                                           | Non-sensitizer                                                                       |
|       |  |  |  |
|       | <i>p</i> -methylhydrocinnamic aldehyde                                             | Phenylpropionaldehyde                                                                | Xylene                                                                               |
| Human | Sensitizer                                                                         | Sensitizer                                                                           | Non-sensitizer                                                                       |
| LLNA  | Sensitizer                                                                         | Sensitizer                                                                           | Sensitizer                                                                           |
| QSAR  | Non-sensitizer                                                                     | Non-sensitizer                                                                       | Non-sensitizer                                                                       |

# CLUSTER 7

10

Conflicting  
experimental  
annotation  
between  
duplicates

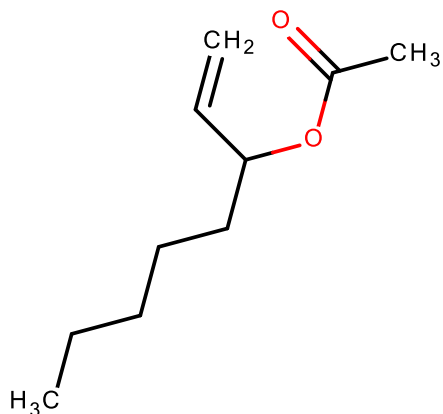

1-Octen-3-yl acetate

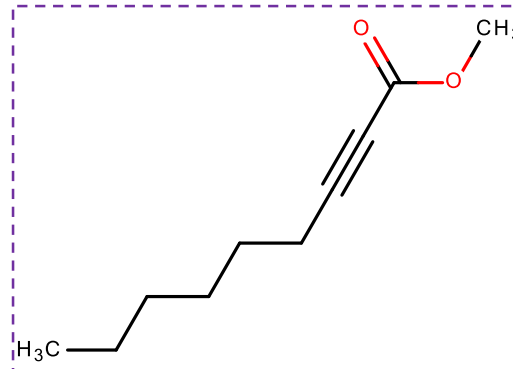

Methyl 2-nonynoate

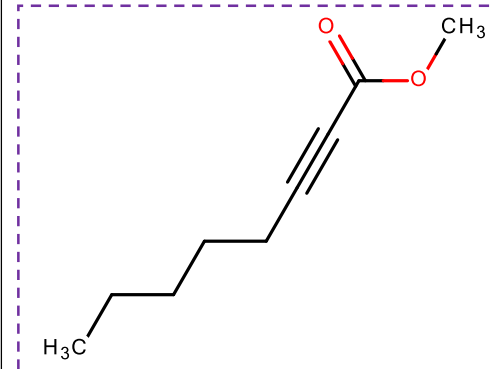

Methyl 2-octynoate

Sensitizer

Sensitizer

Sensitizer

Non-sensitizer

Sensitizer

Sensitizer

Non-sensitizer

Sensitizer

Sensitizer

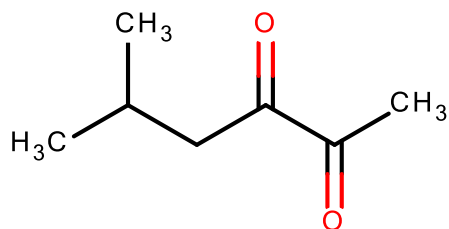

Methylhexanedione

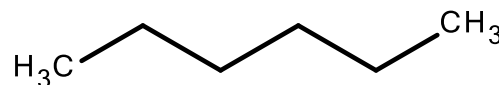

Hexane

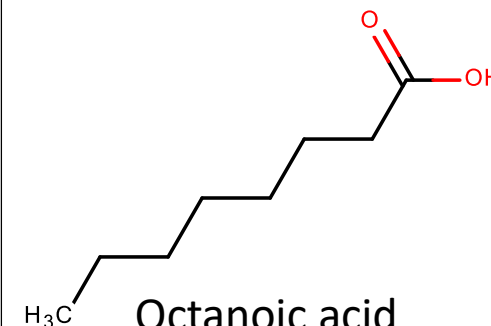

Octanoic acid

Sensitizer

Non-sensitizer

Non-sensitizer

Sensitizer

Non-sensitizer

Non-sensitizer

Non-sensitizer

Non-sensitizer

Non-sensitizer

Human

LLNA

QSAR

Human

LLNA

QSAR

# CLUSTER 8 - CINNAMYL DERIVATIVES

11

Human  
LLNA  
QSAR

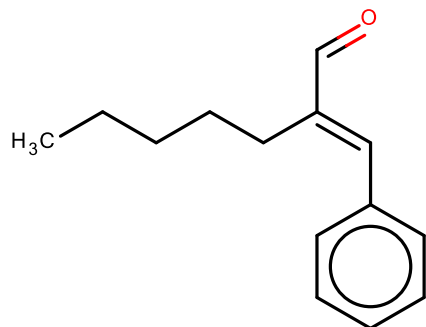

$\alpha$ -amylcinnamic aldehyde

Non-sensitizer

Sensitizer

Non-sensitizer

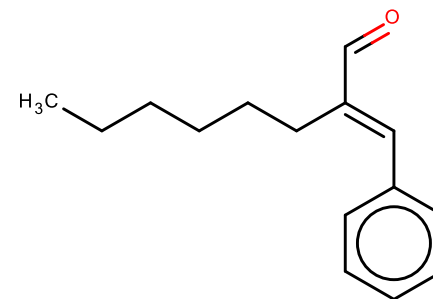

Hexyl cinnamic aldehyde

Non-sensitizer

Sensitizer

Non-sensitizer

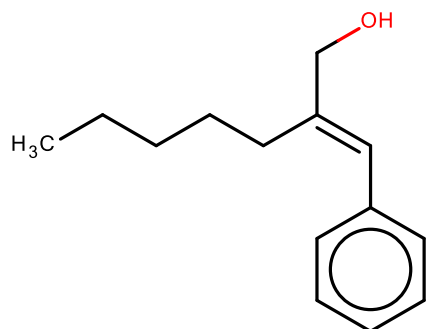

$\alpha$ -amylcinnamyl alcohol

Sensitizer

Non-sensitizer

Non-sensitizer

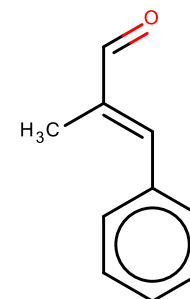

$\alpha$ -methyl cinnamic aldehyde

Non-sensitizer

Sensitizer

Non-sensitizer

Human  
LLNA  
QSAR

# CLUSTER 9 - TERPENES

12

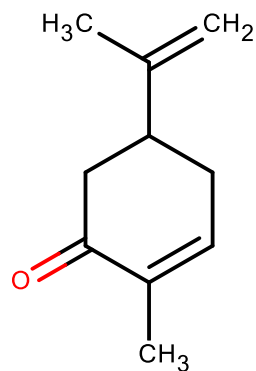

Carvone

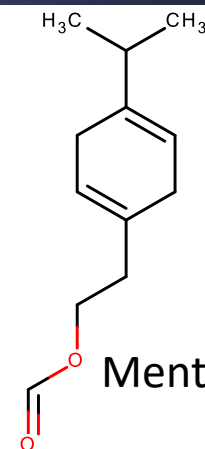

Menthadiene-7-methyl formate

Sensitizer

Sensitizer

Sensitizer

Non-sensitizer

Non-sensitizer

Non-sensitizer

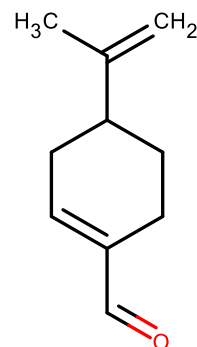

Perillaldehyde

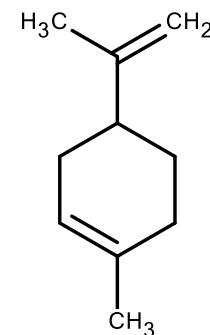

d-Limonene

Sensitizer

Non-sensitizer

Sensitizer

Sensitizer

Sensitizer

Sensitizer

Human

LLNA

QSAR

Human

LLNA

QSAR

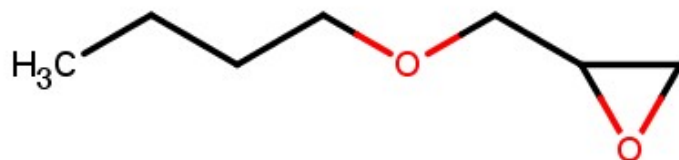

Butyl glycidyl ether

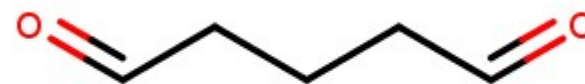

Glutaraldehyde

Human

Sensitizer

Sensitizer

LLNA

Sensitizer

Sensitizer

QSAR

Non-sensitizer

Sensitizer

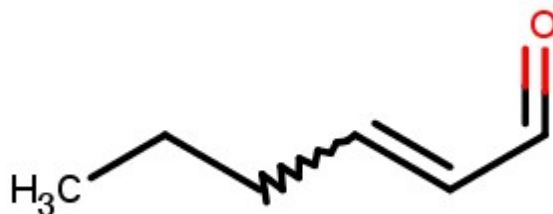*t*-2-hexenal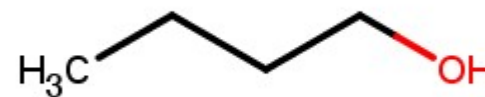

Butanol

Human

Sensitizer

Non-sensitizer

LLNA

Sensitizer

Non-sensitizer

QSAR

Sensitizer

Non-sensitizer

# CLUSTER 11

14

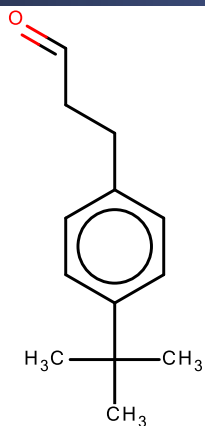

Bourgeonal

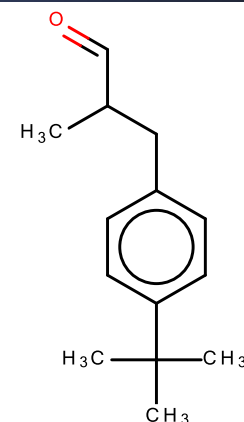

Lilial

Sensitizer

Sensitizer

Sensitizer

Sensitizer

Sensitizer

Sensitizer

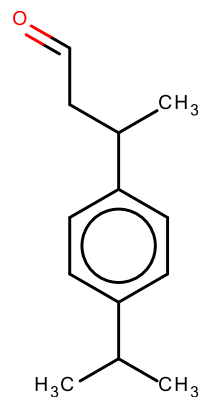

Cyclamen  
aldehyde

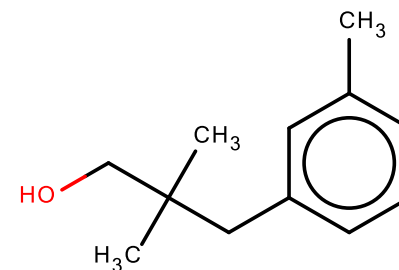

Majantal

Non-sensitizer

Non-sensitizer

Sensitizer

Non-sensitizer

Sensitizer

Sensitizer

Human

LLNA

QSAR

Human

LLNA

QSAR

# CLUSTER 12

15

Conflicting  
experimental  
annotation  
between  
duplicates

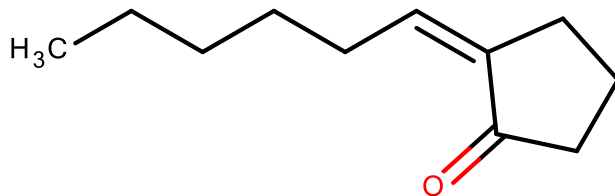

2-Hexylidene cyclopentanone

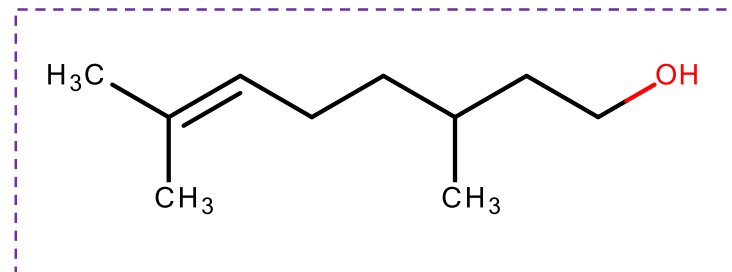

*dl*-Citronellol

Sensitizer

Sensitizer

Sensitizer

Sensitizer

Non-sensitizer

Non-sensitizer

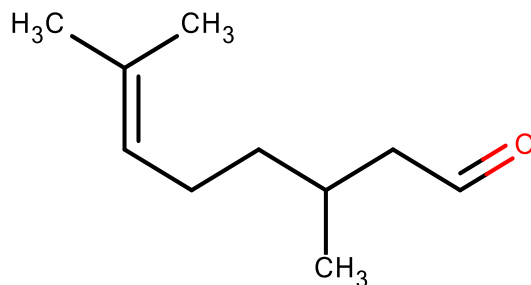

Citronella oil

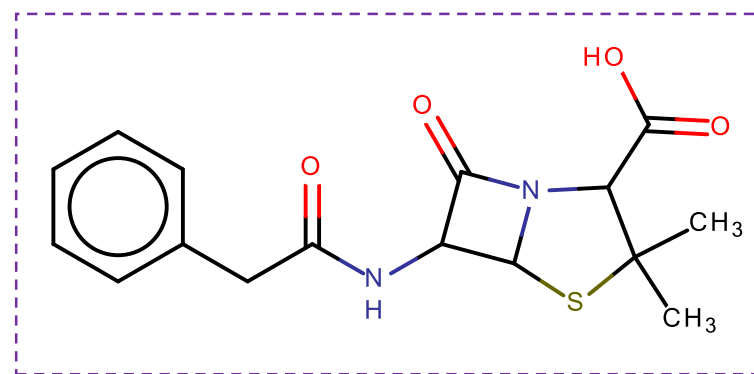

Penicillin G

Non-sensitizer

Sensitizer

Non-sensitizer

Sensitizer

Non-sensitizer

Sensitizer

Human

LLNA

QSAR

Human

LLNA

QSAR

# CLUSTER 13 - OTHER TERPENOIDS

16

Conflicting  
experimental  
annotation  
between  
duplicates

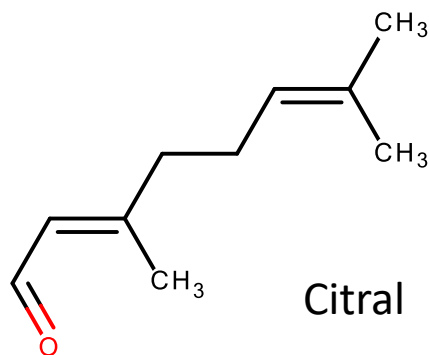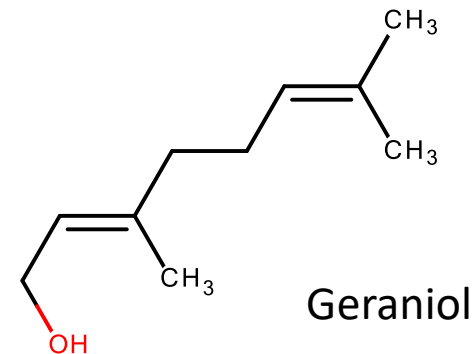

Sensitizer

Sensitizer

Sensitizer

Sensitizer

Non-sensitizer

Sensitizer

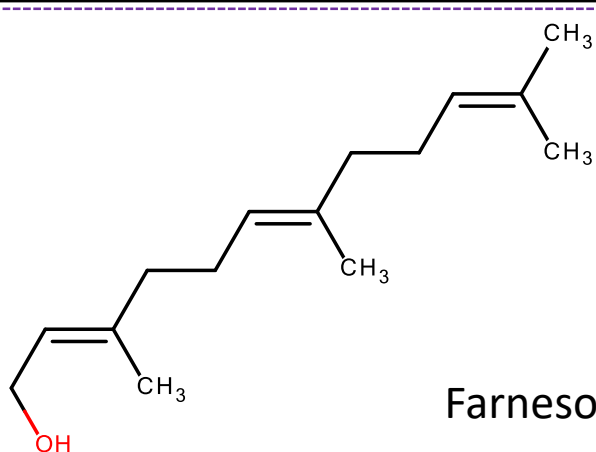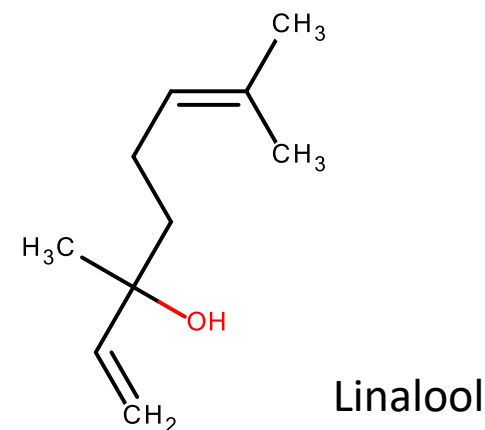

Sensitizer

Non-sensitizer

Sensitizer

Non-sensitizer

Sensitizer

Non-sensitizer

Human

LLNA

QSAR

Human

LLNA

QSAR



# CLUSTER 14 - DAMASCONES

17

Human

LLNA

QSAR

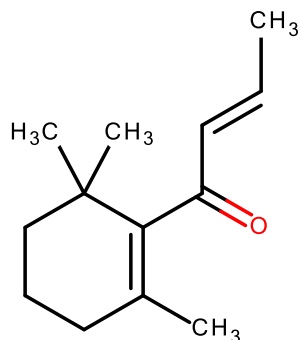

Damascone

Non-sensitizer

Sensitizer

Non-sensitizer

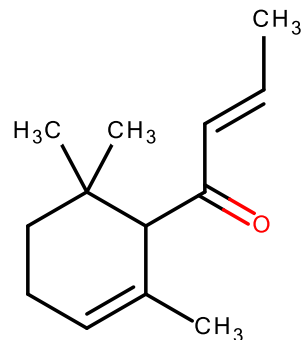

$\alpha$  Damascone

Non-sensitizer

Sensitizer

Non-sensitizer

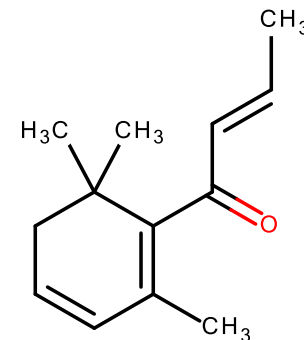

$\beta$  Damascone

Non-sensitizer

Sensitizer

Non-sensitizer

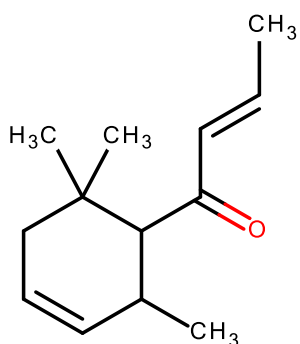

$\delta$  Damascone

Sensitizer

Sensitizer

Non-sensitizer

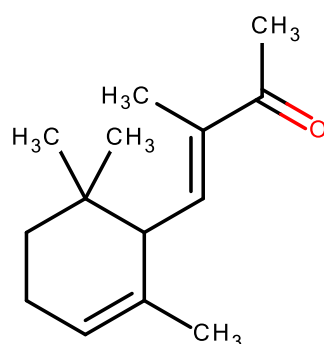

Isomethyl- $\alpha$ -ionone

Non-sensitizer

Sensitizer

Non-sensitizer

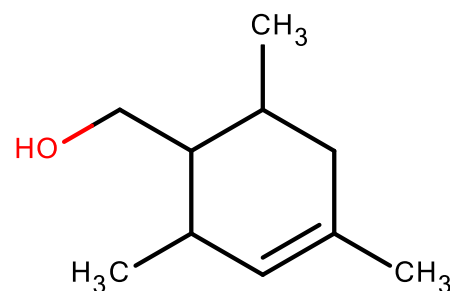

Isocyclogeraniol

Sensitizer

Non-sensitizer

Non-sensitizer

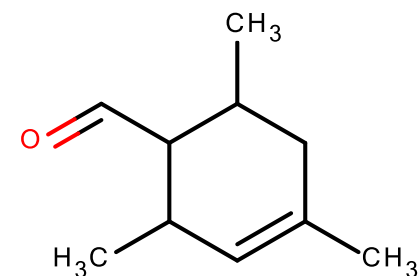

Isocyclocitral

Non-sensitizer

Sensitizer

Non-sensitizer

Human

LLNA

QSAR

# CLUSTER 15

18

Conflicting  
experimental  
annotation  
between  
duplicates

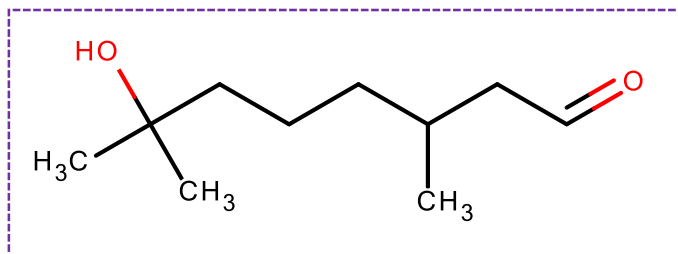

Hydroxycitronellal

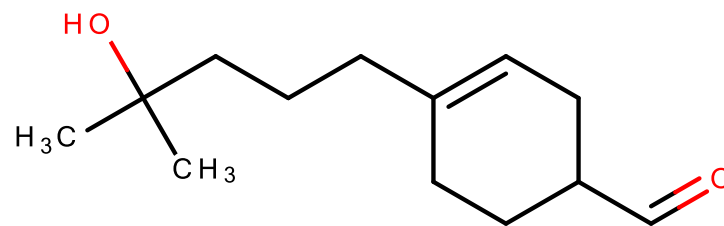

Lyrar

Human

Sensitizer

Non-sensitizer

LLNA

Sensitizer

Sensitizer

QSAR

Non-sensitizer

Non-sensitizer

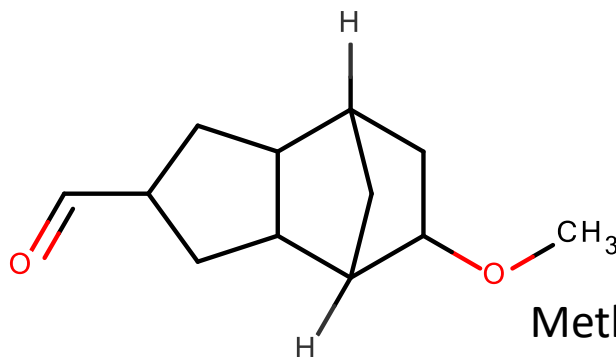

Methoxy dicyclopentadiene  
carboxaldehyde

Human

Non-sensitizer

LLNA

Non-sensitizer

QSAR

Sensitizer

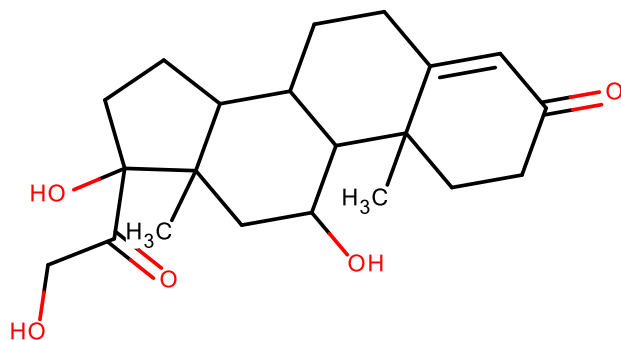

Hydrocortisone

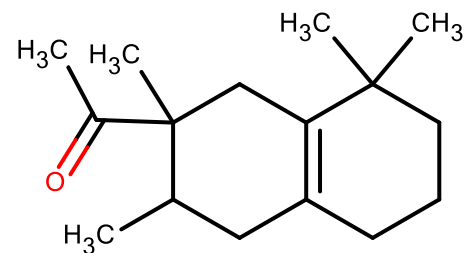

Isocyclemone E

Human  
LLNA  
QSAR

Non-sensitizer

Non-sensitizer

Non-sensitizer

Sensitizer

Non-sensitizer

Sensitizer

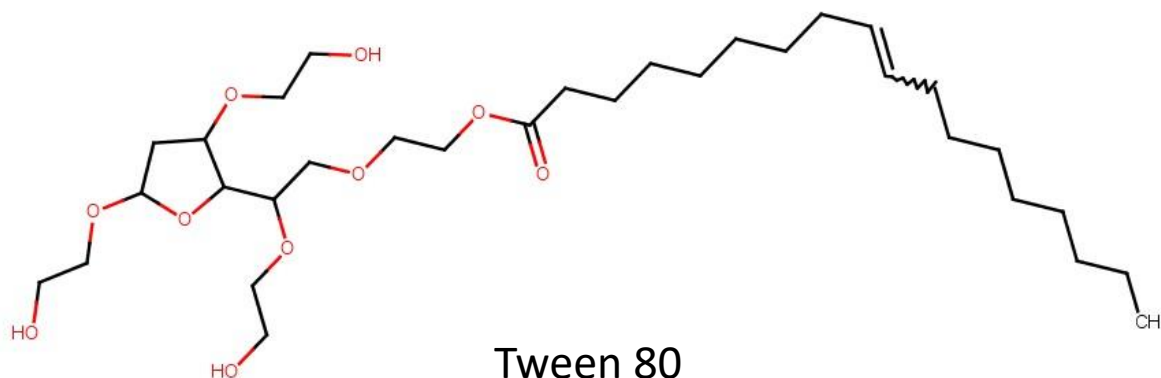

Tween 80

Human  
LLNA  
QSAR

Non-sensitizer

Non-sensitizer

Sensitizer

# CLUSTER 17 - AMINOGLYCOSIDES

20

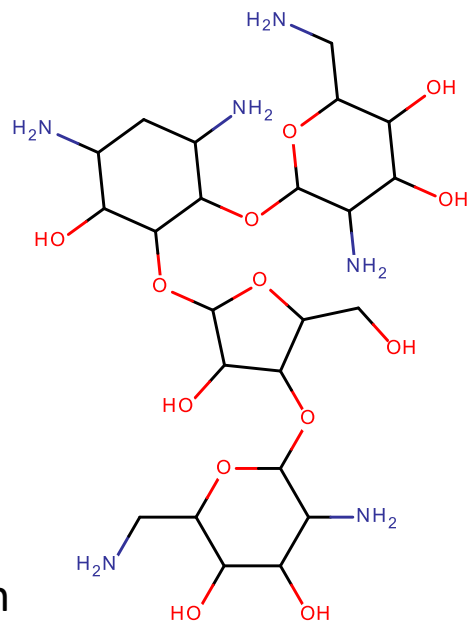

Neomycin

Sensitizer

Non-sensitizer

Sensitizer

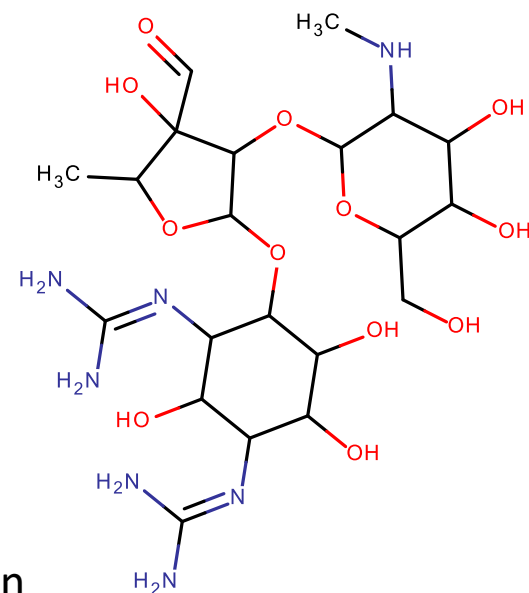

Streptomycin

Sensitizer

Non-sensitizer

Sensitizer

Kanamycin

Sensitizer

Non-sensitizer

Sensitizer

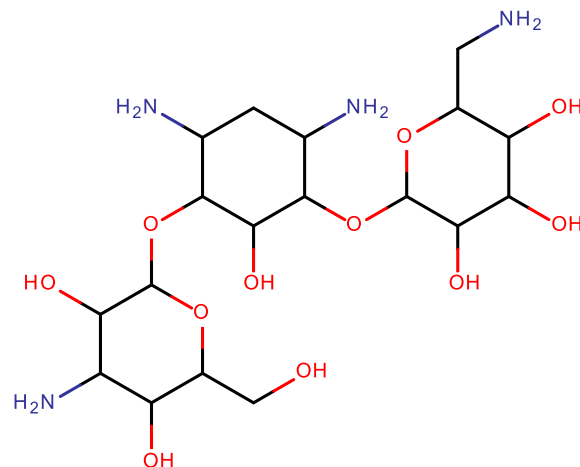

Human  
LLNA  
QSAR

Human  
LLNA  
QSAR

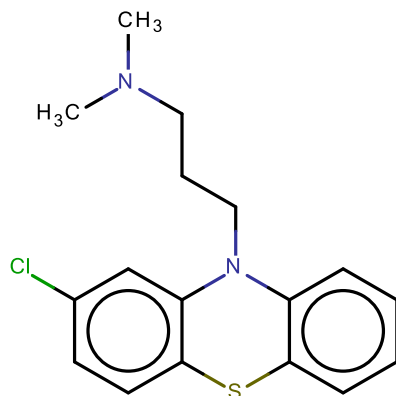

Chlorpromazine

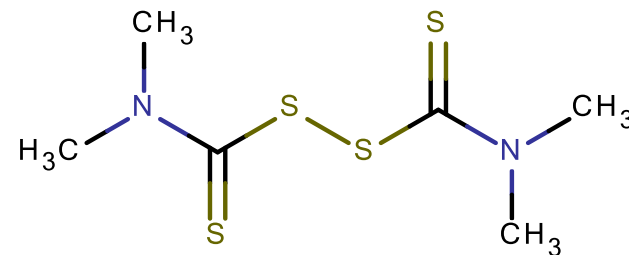

Tetramethylthiuram-disulfide

Human

Sensitizer

Sensitizer

LLNA

Sensitizer

Sensitizer

QSAR

Sensitizer

Sensitizer

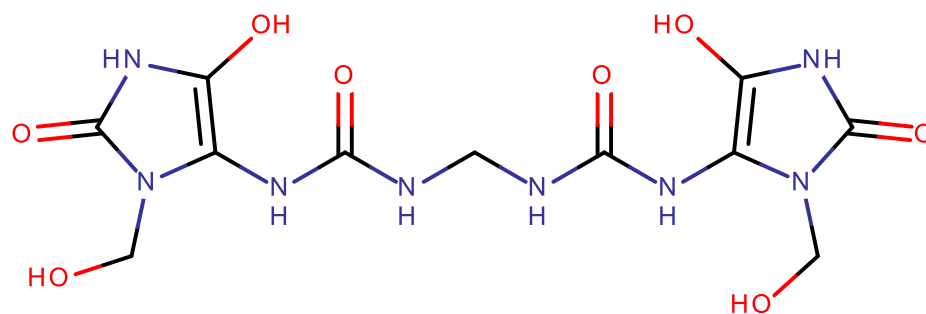

Imidazolidinyl urea

Human

Sensitizer

LLNA

Sensitizer

QSAR

Sensitizer

Conflicting  
experimental  
annotation  
between  
duplicates

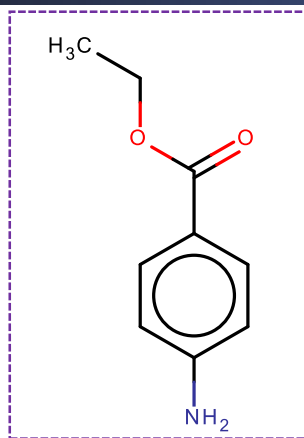

Benzocaine

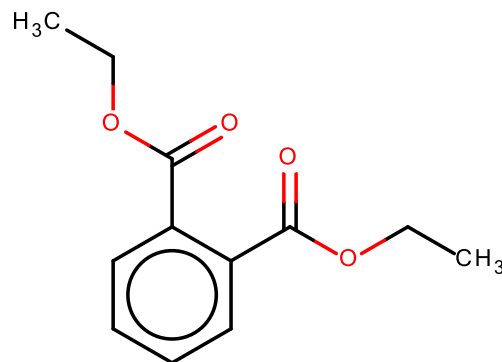

Diethyl phthalate

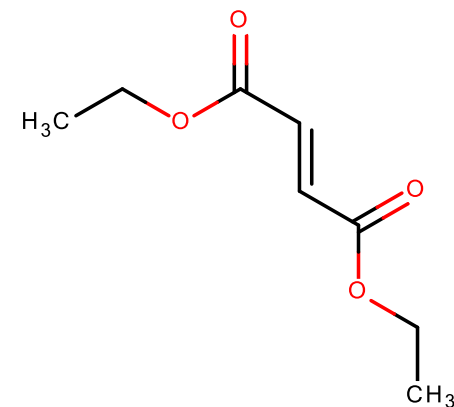

Diethylmaleate

Sensitizer

Non-sensitizer

Sensitizer

Sensitizer

Non-sensitizer

Sensitizer

Sensitizer

Sensitizer

Sensitizer

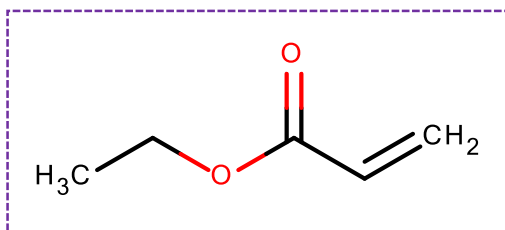

Ethyl acrylate

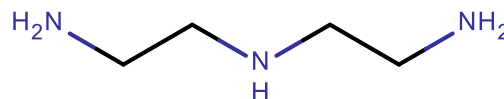

Diethylenetriamine

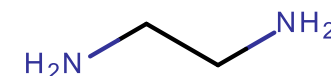

Ethylenediamine

Sensitizer

Sensitizer

Sensitizer

Sensitizer

Sensitizer

Sensitizer

Sensitizer

Sensitizer

Sensitizer

Human

LLNA

QSAR

Human

LLNA

QSAR

Conflicting  
experimental  
annotation  
between  
duplicates

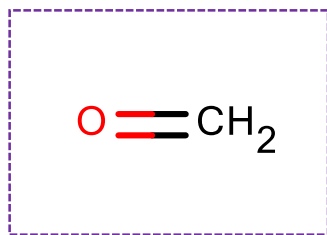

Formaldehyde

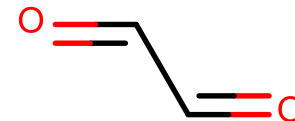

Glyoxal

Sensitizer

Sensitizer

Sensitizer

Sensitizer

Sensitizer

Sensitizer

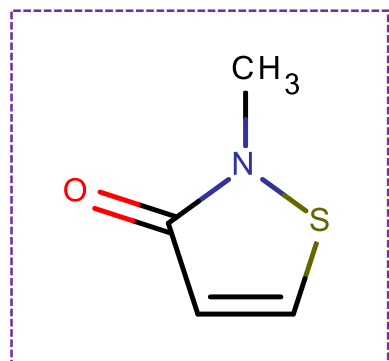

Methylisothiazolinone

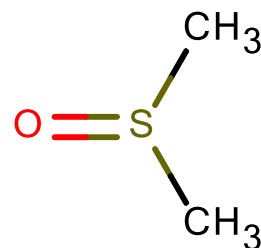

Dimethyl sulfoxide

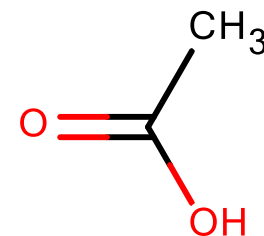

Lead acetate

Sensitizer

Non-sensitizer

Non-sensitizer

Sensitizer

Sensitizer

Non-sensitizer

Sensitizer

Sensitizer

Non-sensitizer

Human

LLNA

QSAR

Human

LLNA

QSAR

# CLUSTER 21

24

Human

LLNA

QSAR

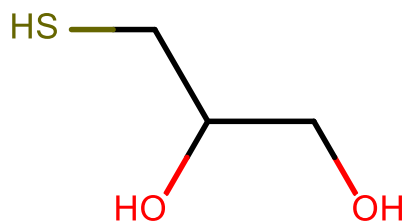

Thioglycerol

Sensitizer

Sensitizer

Non-sensitizer

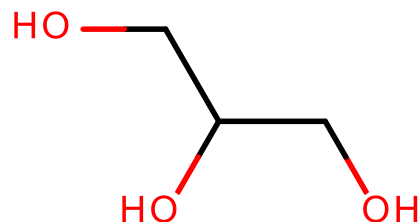

Glycerol

Non-sensitizer

Non-sensitizer

Non-sensitizer

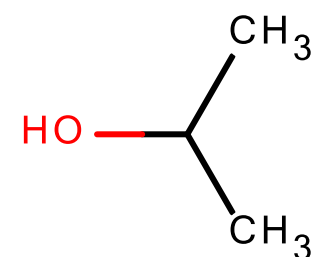

Isopropanol

Non-sensitizer

Non-sensitizer

Non-sensitizer

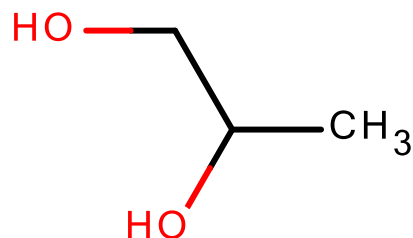

Propylene glycol

Non-sensitizer

Non-sensitizer

Non-sensitizer

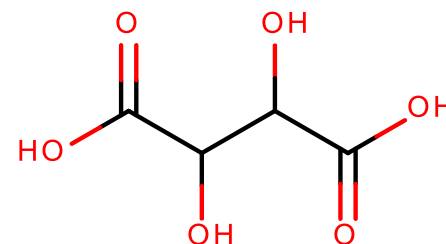

Tartaric acid

Non-sensitizer

Non-sensitizer

Non-sensitizer

Human

LLNA

QSAR



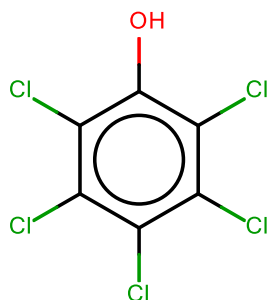

Pentachlorophenol

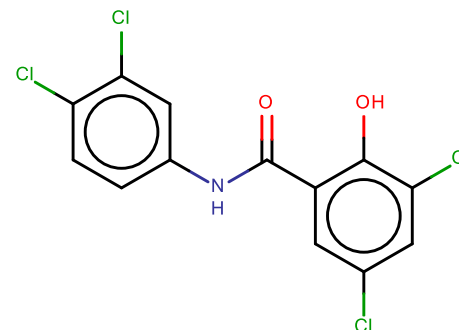

3,3',4',5-Tetrachlorosalicylanilide

Sensitizer

Sensitizer

Sensitizer

Sensitizer

Sensitizer

Sensitizer

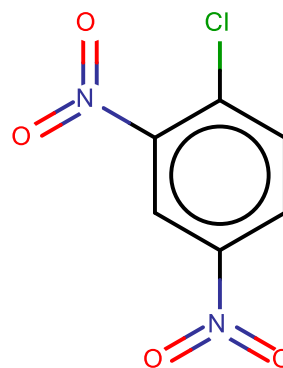

2,4-Dinitrochlorobenzene

Sensitizer

Sensitizer

Sensitizer

Conflicting  
experimental  
annotation  
between  
duplicates

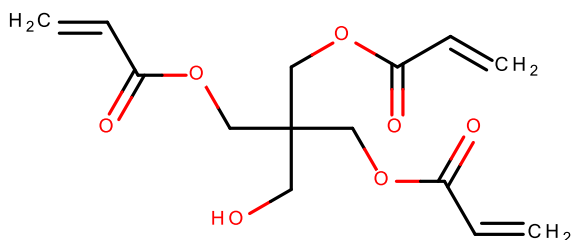

Pentaerythritol  
triacylate

Sensitizer

Non-sensitizer

Sensitizer

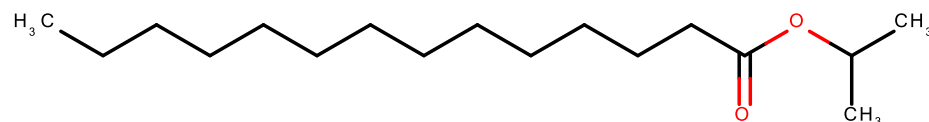

Isopropyl myristate

Non-sensitizer

Sensitizer

Non-sensitizer

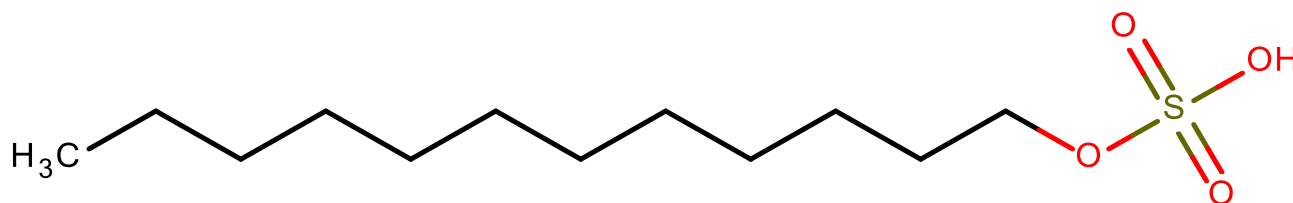

Sodium lauryl sulfate

Non-sensitizer

Sensitizer

Non-sensitizer

Human

LLNA

QSAR

Human

LLNA

QSAR
